# Supplementary material for: Confirmation of Organized Modularity in the Yeast Interactome
Source: PLOS journal article supplement (doi:10.1371/journal.pbio.0050153), 2007-06-08
Supplement: S1 (10.1371/journal.pbio.0050153.s001) [file journal.pbio.0050153.s001]

<?xml version="1.0"?>
<?mso-application progid="Excel.Sheet"?>
<Workbook xmlns="urn:schemas-microsoft-com:office:spreadsheet"
 xmlns:o="urn:schemas-microsoft-com:office:office"
 xmlns:x="urn:schemas-microsoft-com:office:excel"
 xmlns:ss="urn:schemas-microsoft-com:office:spreadsheet"
 xmlns:html="http://www.w3.org/TR/REC-html40">
 <DocumentProperties xmlns="urn:schemas-microsoft-com:office:office">
  <Version>11.8107</Version>
 </DocumentProperties>
 <ExcelWorkbook xmlns="urn:schemas-microsoft-com:office:excel">
  <WindowHeight>10005</WindowHeight>
  <WindowWidth>10005</WindowWidth>
  <WindowTopX>120</WindowTopX>
  <WindowTopY>135</WindowTopY>
  <ProtectStructure>False</ProtectStructure>
  <ProtectWindows>False</ProtectWindows>
 </ExcelWorkbook>
 <Styles>
  <Style ss:ID="Default" ss:Name="Normal">
   <Alignment ss:Vertical="Bottom"/>
   <Borders/>
   <Font/>
   <Interior/>
   <NumberFormat/>
   <Protection/>
  </Style>
 </Styles>
 <Worksheet ss:Name="Table1">
  <Names>
   <NamedRange ss:Name="Print_Area" ss:RefersTo="=Table1!R1C1:R22348C4"/>
  </Names>
  <Table ss:ExpandedColumnCount="4" ss:ExpandedRowCount="22348" x:FullColumns="1"
   x:FullRows="1">
   <Column ss:AutoFitWidth="0" ss:Width="110.25" ss:Span="2"/>
   <Row>
    <Cell><Data ss:Type="String">ORFA</Data><NamedCell ss:Name="Print_Area"/></Cell>
    <Cell><Data ss:Type="String">ORFB</Data><NamedCell ss:Name="Print_Area"/></Cell>
    <Cell><Data ss:Type="String">method</Data><NamedCell ss:Name="Print_Area"/></Cell>
    <Cell><Data ss:Type="String">pmid</Data><NamedCell ss:Name="Print_Area"/></Cell>
   </Row>
   <Row>
    <Cell><Data ss:Type="String">Q0045</Data><NamedCell ss:Name="Print_Area"/></Cell>
    <Cell><Data ss:Type="String">Q0250</Data><NamedCell ss:Name="Print_Area"/></Cell>
    <Cell><Data ss:Type="String">insilico</Data><NamedCell ss:Name="Print_Area"/></Cell>
    <Cell><Data ss:Type="Number">12000970</Data><NamedCell ss:Name="Print_Area"/></Cell>
   </Row>
   <Row>
    <Cell><Data ss:Type="String">Q0045</Data><NamedCell ss:Name="Print_Area"/></Cell>
    <Cell><Data ss:Type="String">Q0250</Data><NamedCell ss:Name="Print_Area"/></Cell>
    <Cell><Data ss:Type="String">cofractionation</Data><NamedCell
      ss:Name="Print_Area"/></Cell>
    <Cell><Data ss:Type="Number">15921494</Data><NamedCell ss:Name="Print_Area"/></Cell>
   </Row>
   <Row>
    <Cell><Data ss:Type="String">Q0045</Data><NamedCell ss:Name="Print_Area"/></Cell>
    <Cell><Data ss:Type="String">Q0275</Data><NamedCell ss:Name="Print_Area"/></Cell>
    <Cell><Data ss:Type="String">insilico</Data><NamedCell ss:Name="Print_Area"/></Cell>
    <Cell><Data ss:Type="Number">12000970</Data><NamedCell ss:Name="Print_Area"/></Cell>
   </Row>
   <Row>
    <Cell><Data ss:Type="String">Q0045</Data><NamedCell ss:Name="Print_Area"/></Cell>
    <Cell><Data ss:Type="String">Q0275</Data><NamedCell ss:Name="Print_Area"/></Cell>
    <Cell><Data ss:Type="String">cofractionation</Data><NamedCell
      ss:Name="Print_Area"/></Cell>
    <Cell><Data ss:Type="Number">15921494</Data><NamedCell ss:Name="Print_Area"/></Cell>
   </Row>
   <Row>
    <Cell><Data ss:Type="String">YAL001C</Data><NamedCell ss:Name="Print_Area"/></Cell>
    <Cell><Data ss:Type="String">YBR123C</Data><NamedCell ss:Name="Print_Area"/></Cell>
    <Cell><Data ss:Type="String">cofractionation</Data><NamedCell
      ss:Name="Print_Area"/></Cell>
    <Cell><Data ss:Type="Number">9584160</Data><NamedCell ss:Name="Print_Area"/></Cell>
   </Row>
   <Row>
    <Cell><Data ss:Type="String">YAL001C</Data><NamedCell ss:Name="Print_Area"/></Cell>
    <Cell><Data ss:Type="String">YBR123C</Data><NamedCell ss:Name="Print_Area"/></Cell>
    <Cell><Data ss:Type="String">affinitycapturewestern</Data><NamedCell
      ss:Name="Print_Area"/></Cell>
    <Cell><Data ss:Type="Number">7688737</Data><NamedCell ss:Name="Print_Area"/></Cell>
   </Row>
   <Row>
    <Cell><Data ss:Type="String">YAL001C</Data><NamedCell ss:Name="Print_Area"/></Cell>
    <Cell><Data ss:Type="String">YBR123C</Data><NamedCell ss:Name="Print_Area"/></Cell>
    <Cell><Data ss:Type="String">affinitycapturems</Data><NamedCell
      ss:Name="Print_Area"/></Cell>
    <Cell><Data ss:Type="Number">16429126</Data><NamedCell ss:Name="Print_Area"/></Cell>
   </Row>
   <Row>
    <Cell><Data ss:Type="String">YAL001C</Data><NamedCell ss:Name="Print_Area"/></Cell>
    <Cell><Data ss:Type="String">YBR123C</Data><NamedCell ss:Name="Print_Area"/></Cell>
    <Cell><Data ss:Type="String">affinitycapturems</Data><NamedCell
      ss:Name="Print_Area"/></Cell>
    <Cell><Data ss:Type="Number">16554755</Data><NamedCell ss:Name="Print_Area"/></Cell>
   </Row>
   <Row>
    <Cell><Data ss:Type="String">YAL001C</Data><NamedCell ss:Name="Print_Area"/></Cell>
    <Cell><Data ss:Type="String">YBR123C</Data><NamedCell ss:Name="Print_Area"/></Cell>
    <Cell><Data ss:Type="String">affinitycapturems</Data><NamedCell
      ss:Name="Print_Area"/></Cell>
    <Cell><Data ss:Type="Number">11805826</Data><NamedCell ss:Name="Print_Area"/></Cell>
   </Row>
   <Row>
    <Cell><Data ss:Type="String">YAL001C</Data><NamedCell ss:Name="Print_Area"/></Cell>
    <Cell><Data ss:Type="String">YBR123C</Data><NamedCell ss:Name="Print_Area"/></Cell>
    <Cell><Data ss:Type="String">affinitycapturewestern</Data><NamedCell
      ss:Name="Print_Area"/></Cell>
    <Cell><Data ss:Type="Number">9584160</Data><NamedCell ss:Name="Print_Area"/></Cell>
   </Row>
   <Row>
    <Cell><Data ss:Type="String">YAL001C</Data><NamedCell ss:Name="Print_Area"/></Cell>
    <Cell><Data ss:Type="String">YDR362C</Data><NamedCell ss:Name="Print_Area"/></Cell>
    <Cell><Data ss:Type="String">affinitycapturewestern</Data><NamedCell
      ss:Name="Print_Area"/></Cell>
    <Cell><Data ss:Type="Number">9584160</Data><NamedCell ss:Name="Print_Area"/></Cell>
   </Row>
   <Row>
    <Cell><Data ss:Type="String">YAL001C</Data><NamedCell ss:Name="Print_Area"/></Cell>
    <Cell><Data ss:Type="String">YDR362C</Data><NamedCell ss:Name="Print_Area"/></Cell>
    <Cell><Data ss:Type="String">unknown</Data><NamedCell ss:Name="Print_Area"/></Cell>
    <Cell><Data ss:Type="Number">9418847</Data><NamedCell ss:Name="Print_Area"/></Cell>
   </Row>
   <Row>
    <Cell><Data ss:Type="String">YAL001C</Data><NamedCell ss:Name="Print_Area"/></Cell>
    <Cell><Data ss:Type="String">YDR362C</Data><NamedCell ss:Name="Print_Area"/></Cell>
    <Cell><Data ss:Type="String">affinitycapturems</Data><NamedCell
      ss:Name="Print_Area"/></Cell>
    <Cell><Data ss:Type="Number">16554755</Data><NamedCell ss:Name="Print_Area"/></Cell>
   </Row>
   <Row>
    <Cell><Data ss:Type="String">YAL001C</Data><NamedCell ss:Name="Print_Area"/></Cell>
    <Cell><Data ss:Type="String">YGR047C</Data><NamedCell ss:Name="Print_Area"/></Cell>
    <Cell><Data ss:Type="String">affinitycapturewestern</Data><NamedCell
      ss:Name="Print_Area"/></Cell>
    <Cell><Data ss:Type="Number">9584160</Data><NamedCell ss:Name="Print_Area"/></Cell>
   </Row>
   <Row>
    <Cell><Data ss:Type="String">YAL001C</Data><NamedCell ss:Name="Print_Area"/></Cell>
    <Cell><Data ss:Type="String">YGR047C</Data><NamedCell ss:Name="Print_Area"/></Cell>
    <Cell><Data ss:Type="String">affinitycapturems</Data><NamedCell
      ss:Name="Print_Area"/></Cell>
    <Cell><Data ss:Type="Number">16554755</Data><NamedCell ss:Name="Print_Area"/></Cell>
   </Row>
   <Row>
    <Cell><Data ss:Type="String">YAL001C</Data><NamedCell ss:Name="Print_Area"/></Cell>
    <Cell><Data ss:Type="String">YOR110W</Data><NamedCell ss:Name="Print_Area"/></Cell>
    <Cell><Data ss:Type="String">affinitycapturewestern</Data><NamedCell
      ss:Name="Print_Area"/></Cell>
    <Cell><Data ss:Type="Number">9584160</Data><NamedCell ss:Name="Print_Area"/></Cell>
   </Row>
   <Row>
    <Cell><Data ss:Type="String">YAL001C</Data><NamedCell ss:Name="Print_Area"/></Cell>
    <Cell><Data ss:Type="String">YOR110W</Data><NamedCell ss:Name="Print_Area"/></Cell>
    <Cell><Data ss:Type="String">affinitycapturems</Data><NamedCell
      ss:Name="Print_Area"/></Cell>
    <Cell><Data ss:Type="Number">16429126</Data><NamedCell ss:Name="Print_Area"/></Cell>
   </Row>
   <Row>
    <Cell><Data ss:Type="String">YAL001C</Data><NamedCell ss:Name="Print_Area"/></Cell>
    <Cell><Data ss:Type="String">YOR110W</Data><NamedCell ss:Name="Print_Area"/></Cell>
    <Cell><Data ss:Type="String">affinitycapturems</Data><NamedCell
      ss:Name="Print_Area"/></Cell>
    <Cell><Data ss:Type="Number">16554755</Data><NamedCell ss:Name="Print_Area"/></Cell>
   </Row>
   <Row>
    <Cell><Data ss:Type="String">YAL002W</Data><NamedCell ss:Name="Print_Area"/></Cell>
    <Cell><Data ss:Type="String">YLR396C</Data><NamedCell ss:Name="Print_Area"/></Cell>
    <Cell><Data ss:Type="String">affinitycapturems</Data><NamedCell
      ss:Name="Print_Area"/></Cell>
    <Cell><Data ss:Type="Number">16429126</Data><NamedCell ss:Name="Print_Area"/></Cell>
   </Row>
   <Row>
    <Cell><Data ss:Type="String">YAL002W</Data><NamedCell ss:Name="Print_Area"/></Cell>
    <Cell><Data ss:Type="String">YLR396C</Data><NamedCell ss:Name="Print_Area"/></Cell>
    <Cell><Data ss:Type="String">affinitycapturems</Data><NamedCell
      ss:Name="Print_Area"/></Cell>
    <Cell><Data ss:Type="Number">11805826</Data><NamedCell ss:Name="Print_Area"/></Cell>
   </Row>
   <Row>
    <Cell><Data ss:Type="String">YAL002W</Data><NamedCell ss:Name="Print_Area"/></Cell>
    <Cell><Data ss:Type="String">YLR396C</Data><NamedCell ss:Name="Print_Area"/></Cell>
    <Cell><Data ss:Type="String">affinitycapturewestern</Data><NamedCell
      ss:Name="Print_Area"/></Cell>
    <Cell><Data ss:Type="Number">15047864</Data><NamedCell ss:Name="Print_Area"/></Cell>
   </Row>
   <Row>
    <Cell><Data ss:Type="String">YAL002W</Data><NamedCell ss:Name="Print_Area"/></Cell>
    <Cell><Data ss:Type="String">YMR231W</Data><NamedCell ss:Name="Print_Area"/></Cell>
    <Cell><Data ss:Type="String">affinitycapturewestern</Data><NamedCell
      ss:Name="Print_Area"/></Cell>
    <Cell><Data ss:Type="Number">15047864</Data><NamedCell ss:Name="Print_Area"/></Cell>
   </Row>
   <Row>
    <Cell><Data ss:Type="String">YAL002W</Data><NamedCell ss:Name="Print_Area"/></Cell>
    <Cell><Data ss:Type="String">YMR231W</Data><NamedCell ss:Name="Print_Area"/></Cell>
    <Cell><Data ss:Type="String">affinitycapturems</Data><NamedCell
      ss:Name="Print_Area"/></Cell>
    <Cell><Data ss:Type="Number">11805826</Data><NamedCell ss:Name="Print_Area"/></Cell>
   </Row>
   <Row>
    <Cell><Data ss:Type="String">YAL002W</Data><NamedCell ss:Name="Print_Area"/></Cell>
    <Cell><Data ss:Type="String">YMR231W</Data><NamedCell ss:Name="Print_Area"/></Cell>
    <Cell><Data ss:Type="String">affinitycapturems</Data><NamedCell
      ss:Name="Print_Area"/></Cell>
    <Cell><Data ss:Type="Number">16429126</Data><NamedCell ss:Name="Print_Area"/></Cell>
   </Row>
   <Row>
    <Cell><Data ss:Type="String">YAL002W</Data><NamedCell ss:Name="Print_Area"/></Cell>
    <Cell><Data ss:Type="String">YPL045W</Data><NamedCell ss:Name="Print_Area"/></Cell>
    <Cell><Data ss:Type="String">affinitycapturems</Data><NamedCell
      ss:Name="Print_Area"/></Cell>
    <Cell><Data ss:Type="Number">16429126</Data><NamedCell ss:Name="Print_Area"/></Cell>
   </Row>
   <Row>
    <Cell><Data ss:Type="String">YAL002W</Data><NamedCell ss:Name="Print_Area"/></Cell>
    <Cell><Data ss:Type="String">YPL045W</Data><NamedCell ss:Name="Print_Area"/></Cell>
    <Cell><Data ss:Type="String">affinitycapturems</Data><NamedCell
      ss:Name="Print_Area"/></Cell>
    <Cell><Data ss:Type="Number">11805826</Data><NamedCell ss:Name="Print_Area"/></Cell>
   </Row>
   <Row>
    <Cell><Data ss:Type="String">YAL002W</Data><NamedCell ss:Name="Print_Area"/></Cell>
    <Cell><Data ss:Type="String">YPL045W</Data><NamedCell ss:Name="Print_Area"/></Cell>
    <Cell><Data ss:Type="String">affinitycapturewestern</Data><NamedCell
      ss:Name="Print_Area"/></Cell>
    <Cell><Data ss:Type="Number">15047864</Data><NamedCell ss:Name="Print_Area"/></Cell>
   </Row>
   <Row>
    <Cell><Data ss:Type="String">YAL003W</Data><NamedCell ss:Name="Print_Area"/></Cell>
    <Cell><Data ss:Type="String">YBR118W</Data><NamedCell ss:Name="Print_Area"/></Cell>
    <Cell><Data ss:Type="String">unknown</Data><NamedCell ss:Name="Print_Area"/></Cell>
    <Cell><Data ss:Type="Number">11134944</Data><NamedCell ss:Name="Print_Area"/></Cell>
   </Row>
   <Row>
    <Cell><Data ss:Type="String">YAL003W</Data><NamedCell ss:Name="Print_Area"/></Cell>
    <Cell><Data ss:Type="String">YBR118W</Data><NamedCell ss:Name="Print_Area"/></Cell>
    <Cell><Data ss:Type="String">cocrystalstructure</Data><NamedCell
      ss:Name="Print_Area"/></Cell>
    <Cell><Data ss:Type="Number">11134944</Data><NamedCell ss:Name="Print_Area"/></Cell>
   </Row>
   <Row>
    <Cell><Data ss:Type="String">YAL003W</Data><NamedCell ss:Name="Print_Area"/></Cell>
    <Cell><Data ss:Type="String">YBR118W</Data><NamedCell ss:Name="Print_Area"/></Cell>
    <Cell><Data ss:Type="String">unknown</Data><NamedCell ss:Name="Print_Area"/></Cell>
    <Cell><Data ss:Type="Number">8647386</Data><NamedCell ss:Name="Print_Area"/></Cell>
   </Row>
   <Row>
    <Cell><Data ss:Type="String">YAL003W</Data><NamedCell ss:Name="Print_Area"/></Cell>
    <Cell><Data ss:Type="String">YBR118W</Data><NamedCell ss:Name="Print_Area"/></Cell>
    <Cell><Data ss:Type="String">affinitycapturems</Data><NamedCell
      ss:Name="Print_Area"/></Cell>
    <Cell><Data ss:Type="Number">16429126</Data><NamedCell ss:Name="Print_Area"/></Cell>
   </Row>
   <Row>
    <Cell><Data ss:Type="String">YAL003W</Data><NamedCell ss:Name="Print_Area"/></Cell>
    <Cell><Data ss:Type="String">YBR118W</Data><NamedCell ss:Name="Print_Area"/></Cell>
    <Cell><Data ss:Type="String">affinitycapturems</Data><NamedCell
      ss:Name="Print_Area"/></Cell>
    <Cell><Data ss:Type="Number">11805826</Data><NamedCell ss:Name="Print_Area"/></Cell>
   </Row>
   <Row>
    <Cell><Data ss:Type="String">YAL003W</Data><NamedCell ss:Name="Print_Area"/></Cell>
    <Cell><Data ss:Type="String">YKL081W</Data><NamedCell ss:Name="Print_Area"/></Cell>
    <Cell><Data ss:Type="String">unknown</Data><NamedCell ss:Name="Print_Area"/></Cell>
    <Cell><Data ss:Type="Number">8041634</Data><NamedCell ss:Name="Print_Area"/></Cell>
   </Row>
   <Row>
    <Cell><Data ss:Type="String">YAL003W</Data><NamedCell ss:Name="Print_Area"/></Cell>
    <Cell><Data ss:Type="String">YKL081W</Data><NamedCell ss:Name="Print_Area"/></Cell>
    <Cell><Data ss:Type="String">affinitycapturems</Data><NamedCell
      ss:Name="Print_Area"/></Cell>
    <Cell><Data ss:Type="Number">11805826</Data><NamedCell ss:Name="Print_Area"/></Cell>
   </Row>
   <Row>
    <Cell><Data ss:Type="String">YAL003W</Data><NamedCell ss:Name="Print_Area"/></Cell>
    <Cell><Data ss:Type="String">YKL081W</Data><NamedCell ss:Name="Print_Area"/></Cell>
    <Cell><Data ss:Type="String">affinitycapturems</Data><NamedCell
      ss:Name="Print_Area"/></Cell>
    <Cell><Data ss:Type="Number">16429126</Data><NamedCell ss:Name="Print_Area"/></Cell>
   </Row>
   <Row>
    <Cell><Data ss:Type="String">YAL003W</Data><NamedCell ss:Name="Print_Area"/></Cell>
    <Cell><Data ss:Type="String">YPR080W</Data><NamedCell ss:Name="Print_Area"/></Cell>
    <Cell><Data ss:Type="String">unknown</Data><NamedCell ss:Name="Print_Area"/></Cell>
    <Cell><Data ss:Type="Number">11134944</Data><NamedCell ss:Name="Print_Area"/></Cell>
   </Row>
   <Row>
    <Cell><Data ss:Type="String">YAL003W</Data><NamedCell ss:Name="Print_Area"/></Cell>
    <Cell><Data ss:Type="String">YPR080W</Data><NamedCell ss:Name="Print_Area"/></Cell>
    <Cell><Data ss:Type="String">cocrystalstructure</Data><NamedCell
      ss:Name="Print_Area"/></Cell>
    <Cell><Data ss:Type="Number">11134944</Data><NamedCell ss:Name="Print_Area"/></Cell>
   </Row>
   <Row>
    <Cell><Data ss:Type="String">YAL005C</Data><NamedCell ss:Name="Print_Area"/></Cell>
    <Cell><Data ss:Type="String">YAR002W</Data><NamedCell ss:Name="Print_Area"/></Cell>
    <Cell><Data ss:Type="String">reconstitutedcomplex</Data><NamedCell
      ss:Name="Print_Area"/></Cell>
    <Cell><Data ss:Type="Number">11387327</Data><NamedCell ss:Name="Print_Area"/></Cell>
   </Row>
   <Row>
    <Cell><Data ss:Type="String">YAL005C</Data><NamedCell ss:Name="Print_Area"/></Cell>
    <Cell><Data ss:Type="String">YAR002W</Data><NamedCell ss:Name="Print_Area"/></Cell>
    <Cell><Data ss:Type="String">affinitycapturems</Data><NamedCell
      ss:Name="Print_Area"/></Cell>
    <Cell><Data ss:Type="Number">11387327</Data><NamedCell ss:Name="Print_Area"/></Cell>
   </Row>
   <Row>
    <Cell><Data ss:Type="String">YAL005C</Data><NamedCell ss:Name="Print_Area"/></Cell>
    <Cell><Data ss:Type="String">YAR002W</Data><NamedCell ss:Name="Print_Area"/></Cell>
    <Cell><Data ss:Type="String">reconstitutedcomplex</Data><NamedCell
      ss:Name="Print_Area"/></Cell>
    <Cell><Data ss:Type="Number">11535617</Data><NamedCell ss:Name="Print_Area"/></Cell>
   </Row>
   <Row>
    <Cell><Data ss:Type="String">YAL005C</Data><NamedCell ss:Name="Print_Area"/></Cell>
    <Cell><Data ss:Type="String">YAR002W</Data><NamedCell ss:Name="Print_Area"/></Cell>
    <Cell><Data ss:Type="String">affinitycapturewestern</Data><NamedCell
      ss:Name="Print_Area"/></Cell>
    <Cell><Data ss:Type="Number">11535617</Data><NamedCell ss:Name="Print_Area"/></Cell>
   </Row>
   <Row>
    <Cell><Data ss:Type="String">YAL005C</Data><NamedCell ss:Name="Print_Area"/></Cell>
    <Cell><Data ss:Type="String">YDR172W</Data><NamedCell ss:Name="Print_Area"/></Cell>
    <Cell><Data ss:Type="String">reconstitutedcomplex</Data><NamedCell
      ss:Name="Print_Area"/></Cell>
    <Cell><Data ss:Type="Number">15545639</Data><NamedCell ss:Name="Print_Area"/></Cell>
   </Row>
   <Row>
    <Cell><Data ss:Type="String">YAL005C</Data><NamedCell ss:Name="Print_Area"/></Cell>
    <Cell><Data ss:Type="String">YDR172W</Data><NamedCell ss:Name="Print_Area"/></Cell>
    <Cell><Data ss:Type="String">affinitycapturewestern</Data><NamedCell
      ss:Name="Print_Area"/></Cell>
    <Cell><Data ss:Type="Number">15545639</Data><NamedCell ss:Name="Print_Area"/></Cell>
   </Row>
   <Row>
    <Cell><Data ss:Type="String">YAL005C</Data><NamedCell ss:Name="Print_Area"/></Cell>
    <Cell><Data ss:Type="String">YDR192C</Data><NamedCell ss:Name="Print_Area"/></Cell>
    <Cell><Data ss:Type="String">reconstitutedcomplex</Data><NamedCell
      ss:Name="Print_Area"/></Cell>
    <Cell><Data ss:Type="Number">11387327</Data><NamedCell ss:Name="Print_Area"/></Cell>
   </Row>
   <Row>
    <Cell><Data ss:Type="String">YAL005C</Data><NamedCell ss:Name="Print_Area"/></Cell>
    <Cell><Data ss:Type="String">YDR192C</Data><NamedCell ss:Name="Print_Area"/></Cell>
    <Cell><Data ss:Type="String">affinitycapturems</Data><NamedCell
      ss:Name="Print_Area"/></Cell>
    <Cell><Data ss:Type="Number">11387327</Data><NamedCell ss:Name="Print_Area"/></Cell>
   </Row>
   <Row>
    <Cell><Data ss:Type="String">YAL005C</Data><NamedCell ss:Name="Print_Area"/></Cell>
    <Cell><Data ss:Type="String">YDR510W</Data><NamedCell ss:Name="Print_Area"/></Cell>
    <Cell><Data ss:Type="String">affinitycapturems</Data><NamedCell
      ss:Name="Print_Area"/></Cell>
    <Cell><Data ss:Type="Number">15292183</Data><NamedCell ss:Name="Print_Area"/></Cell>
   </Row>
   <Row>
    <Cell><Data ss:Type="String">YAL005C</Data><NamedCell ss:Name="Print_Area"/></Cell>
    <Cell><Data ss:Type="String">YDR510W</Data><NamedCell ss:Name="Print_Area"/></Cell>
    <Cell><Data ss:Type="String">affinitycapturems</Data><NamedCell
      ss:Name="Print_Area"/></Cell>
    <Cell><Data ss:Type="Number">15590687</Data><NamedCell ss:Name="Print_Area"/></Cell>
   </Row>
   <Row>
    <Cell><Data ss:Type="String">YAL005C</Data><NamedCell ss:Name="Print_Area"/></Cell>
    <Cell><Data ss:Type="String">YER165W</Data><NamedCell ss:Name="Print_Area"/></Cell>
    <Cell><Data ss:Type="String">affinitycapturewestern</Data><NamedCell
      ss:Name="Print_Area"/></Cell>
    <Cell><Data ss:Type="Number">11279042</Data><NamedCell ss:Name="Print_Area"/></Cell>
   </Row>
   <Row>
    <Cell><Data ss:Type="String">YAL005C</Data><NamedCell ss:Name="Print_Area"/></Cell>
    <Cell><Data ss:Type="String">YER165W</Data><NamedCell ss:Name="Print_Area"/></Cell>
    <Cell><Data ss:Type="String">reconstitutedcomplex</Data><NamedCell
      ss:Name="Print_Area"/></Cell>
    <Cell><Data ss:Type="Number">11279042</Data><NamedCell ss:Name="Print_Area"/></Cell>
   </Row>
   <Row>
    <Cell><Data ss:Type="String">YAL005C</Data><NamedCell ss:Name="Print_Area"/></Cell>
    <Cell><Data ss:Type="String">YLL024C</Data><NamedCell ss:Name="Print_Area"/></Cell>
    <Cell><Data ss:Type="String">affinitycapturems</Data><NamedCell
      ss:Name="Print_Area"/></Cell>
    <Cell><Data ss:Type="Number">16219770</Data><NamedCell ss:Name="Print_Area"/></Cell>
   </Row>
   <Row>
    <Cell><Data ss:Type="String">YAL005C</Data><NamedCell ss:Name="Print_Area"/></Cell>
    <Cell><Data ss:Type="String">YLL024C</Data><NamedCell ss:Name="Print_Area"/></Cell>
    <Cell><Data ss:Type="String">cofractionation</Data><NamedCell
      ss:Name="Print_Area"/></Cell>
    <Cell><Data ss:Type="Number">16219770</Data><NamedCell ss:Name="Print_Area"/></Cell>
   </Row>
   <Row>
    <Cell><Data ss:Type="String">YAL005C</Data><NamedCell ss:Name="Print_Area"/></Cell>
    <Cell><Data ss:Type="String">YLR310C</Data><NamedCell ss:Name="Print_Area"/></Cell>
    <Cell><Data ss:Type="String">unknown</Data><NamedCell ss:Name="Print_Area"/></Cell>
    <Cell><Data ss:Type="Number">10094633</Data><NamedCell ss:Name="Print_Area"/></Cell>
   </Row>
   <Row>
    <Cell><Data ss:Type="String">YAL005C</Data><NamedCell ss:Name="Print_Area"/></Cell>
    <Cell><Data ss:Type="String">YLR310C</Data><NamedCell ss:Name="Print_Area"/></Cell>
    <Cell><Data ss:Type="String">reconstitutedcomplex</Data><NamedCell
      ss:Name="Print_Area"/></Cell>
    <Cell><Data ss:Type="Number">10094633</Data><NamedCell ss:Name="Print_Area"/></Cell>
   </Row>
   <Row>
    <Cell><Data ss:Type="String">YAL005C</Data><NamedCell ss:Name="Print_Area"/></Cell>
    <Cell><Data ss:Type="String">YLR310C</Data><NamedCell ss:Name="Print_Area"/></Cell>
    <Cell><Data ss:Type="String">affinitycapturewestern</Data><NamedCell
      ss:Name="Print_Area"/></Cell>
    <Cell><Data ss:Type="Number">10094633</Data><NamedCell ss:Name="Print_Area"/></Cell>
   </Row>
   <Row>
    <Cell><Data ss:Type="String">YAL005C</Data><NamedCell ss:Name="Print_Area"/></Cell>
    <Cell><Data ss:Type="String">YLR335W</Data><NamedCell ss:Name="Print_Area"/></Cell>
    <Cell><Data ss:Type="String">reconstitutedcomplex</Data><NamedCell
      ss:Name="Print_Area"/></Cell>
    <Cell><Data ss:Type="Number">11387327</Data><NamedCell ss:Name="Print_Area"/></Cell>
   </Row>
   <Row>
    <Cell><Data ss:Type="String">YAL005C</Data><NamedCell ss:Name="Print_Area"/></Cell>
    <Cell><Data ss:Type="String">YLR335W</Data><NamedCell ss:Name="Print_Area"/></Cell>
    <Cell><Data ss:Type="String">affinitycapturems</Data><NamedCell
      ss:Name="Print_Area"/></Cell>
    <Cell><Data ss:Type="Number">11387327</Data><NamedCell ss:Name="Print_Area"/></Cell>
   </Row>
   <Row>
    <Cell><Data ss:Type="String">YAL005C</Data><NamedCell ss:Name="Print_Area"/></Cell>
    <Cell><Data ss:Type="String">YLR347C</Data><NamedCell ss:Name="Print_Area"/></Cell>
    <Cell><Data ss:Type="String">affinitycapturewestern</Data><NamedCell
      ss:Name="Print_Area"/></Cell>
    <Cell><Data ss:Type="Number">11535617</Data><NamedCell ss:Name="Print_Area"/></Cell>
   </Row>
   <Row>
    <Cell><Data ss:Type="String">YAL005C</Data><NamedCell ss:Name="Print_Area"/></Cell>
    <Cell><Data ss:Type="String">YLR347C</Data><NamedCell ss:Name="Print_Area"/></Cell>
    <Cell><Data ss:Type="String">reconstitutedcomplex</Data><NamedCell
      ss:Name="Print_Area"/></Cell>
    <Cell><Data ss:Type="Number">11535617</Data><NamedCell ss:Name="Print_Area"/></Cell>
   </Row>
   <Row>
    <Cell><Data ss:Type="String">YAL005C</Data><NamedCell ss:Name="Print_Area"/></Cell>
    <Cell><Data ss:Type="String">YNL007C</Data><NamedCell ss:Name="Print_Area"/></Cell>
    <Cell><Data ss:Type="String">affinitycapturewestern</Data><NamedCell
      ss:Name="Print_Area"/></Cell>
    <Cell><Data ss:Type="Number">11743879</Data><NamedCell ss:Name="Print_Area"/></Cell>
   </Row>
   <Row>
    <Cell><Data ss:Type="String">YAL005C</Data><NamedCell ss:Name="Print_Area"/></Cell>
    <Cell><Data ss:Type="String">YNL007C</Data><NamedCell ss:Name="Print_Area"/></Cell>
    <Cell><Data ss:Type="String">reconstitutedcomplex</Data><NamedCell
      ss:Name="Print_Area"/></Cell>
    <Cell><Data ss:Type="Number">11743879</Data><NamedCell ss:Name="Print_Area"/></Cell>
   </Row>
   <Row>
    <Cell><Data ss:Type="String">YAL005C</Data><NamedCell ss:Name="Print_Area"/></Cell>
    <Cell><Data ss:Type="String">YNL007C</Data><NamedCell ss:Name="Print_Area"/></Cell>
    <Cell><Data ss:Type="String">cocrystalstructure</Data><NamedCell
      ss:Name="Print_Area"/></Cell>
    <Cell><Data ss:Type="Number">11743879</Data><NamedCell ss:Name="Print_Area"/></Cell>
   </Row>
   <Row>
    <Cell><Data ss:Type="String">YAL005C</Data><NamedCell ss:Name="Print_Area"/></Cell>
    <Cell><Data ss:Type="String">YNL007C</Data><NamedCell ss:Name="Print_Area"/></Cell>
    <Cell><Data ss:Type="String">affinitycapturewestern</Data><NamedCell
      ss:Name="Print_Area"/></Cell>
    <Cell><Data ss:Type="Number">11279042</Data><NamedCell ss:Name="Print_Area"/></Cell>
   </Row>
   <Row>
    <Cell><Data ss:Type="String">YAL005C</Data><NamedCell ss:Name="Print_Area"/></Cell>
    <Cell><Data ss:Type="String">YNL007C</Data><NamedCell ss:Name="Print_Area"/></Cell>
    <Cell><Data ss:Type="String">unknown</Data><NamedCell ss:Name="Print_Area"/></Cell>
    <Cell><Data ss:Type="Number">11743879</Data><NamedCell ss:Name="Print_Area"/></Cell>
   </Row>
   <Row>
    <Cell><Data ss:Type="String">YAL005C</Data><NamedCell ss:Name="Print_Area"/></Cell>
    <Cell><Data ss:Type="String">YNL007C</Data><NamedCell ss:Name="Print_Area"/></Cell>
    <Cell><Data ss:Type="String">proteinpeptide</Data><NamedCell
      ss:Name="Print_Area"/></Cell>
    <Cell><Data ss:Type="Number">11743879</Data><NamedCell ss:Name="Print_Area"/></Cell>
   </Row>
   <Row>
    <Cell><Data ss:Type="String">YAL005C</Data><NamedCell ss:Name="Print_Area"/></Cell>
    <Cell><Data ss:Type="String">YNL064C</Data><NamedCell ss:Name="Print_Area"/></Cell>
    <Cell><Data ss:Type="String">affinitycapturewestern</Data><NamedCell
      ss:Name="Print_Area"/></Cell>
    <Cell><Data ss:Type="Number">15082786</Data><NamedCell ss:Name="Print_Area"/></Cell>
   </Row>
   <Row>
    <Cell><Data ss:Type="String">YAL005C</Data><NamedCell ss:Name="Print_Area"/></Cell>
    <Cell><Data ss:Type="String">YNL064C</Data><NamedCell ss:Name="Print_Area"/></Cell>
    <Cell><Data ss:Type="String">affinitycapturewestern</Data><NamedCell
      ss:Name="Print_Area"/></Cell>
    <Cell><Data ss:Type="Number">9792686</Data><NamedCell ss:Name="Print_Area"/></Cell>
   </Row>
   <Row>
    <Cell><Data ss:Type="String">YAL005C</Data><NamedCell ss:Name="Print_Area"/></Cell>
    <Cell><Data ss:Type="String">YNL064C</Data><NamedCell ss:Name="Print_Area"/></Cell>
    <Cell><Data ss:Type="String">biochemicalactivity</Data><NamedCell
      ss:Name="Print_Area"/></Cell>
    <Cell><Data ss:Type="Number">8144572</Data><NamedCell ss:Name="Print_Area"/></Cell>
   </Row>
   <Row>
    <Cell><Data ss:Type="String">YAL005C</Data><NamedCell ss:Name="Print_Area"/></Cell>
    <Cell><Data ss:Type="String">YNL064C</Data><NamedCell ss:Name="Print_Area"/></Cell>
    <Cell><Data ss:Type="String">affinitycapturewestern</Data><NamedCell
      ss:Name="Print_Area"/></Cell>
    <Cell><Data ss:Type="Number">1400408</Data><NamedCell ss:Name="Print_Area"/></Cell>
   </Row>
   <Row>
    <Cell><Data ss:Type="String">YAL005C</Data><NamedCell ss:Name="Print_Area"/></Cell>
    <Cell><Data ss:Type="String">YNL064C</Data><NamedCell ss:Name="Print_Area"/></Cell>
    <Cell><Data ss:Type="String">cofractionation</Data><NamedCell
      ss:Name="Print_Area"/></Cell>
    <Cell><Data ss:Type="Number">7673245</Data><NamedCell ss:Name="Print_Area"/></Cell>
   </Row>
   <Row>
    <Cell><Data ss:Type="String">YAL005C</Data><NamedCell ss:Name="Print_Area"/></Cell>
    <Cell><Data ss:Type="String">YNL064C</Data><NamedCell ss:Name="Print_Area"/></Cell>
    <Cell><Data ss:Type="String">affinitycapturewestern</Data><NamedCell
      ss:Name="Print_Area"/></Cell>
    <Cell><Data ss:Type="Number">8144572</Data><NamedCell ss:Name="Print_Area"/></Cell>
   </Row>
   <Row>
    <Cell><Data ss:Type="String">YAL005C</Data><NamedCell ss:Name="Print_Area"/></Cell>
    <Cell><Data ss:Type="String">YNL064C</Data><NamedCell ss:Name="Print_Area"/></Cell>
    <Cell><Data ss:Type="String">reconstitutedcomplex</Data><NamedCell
      ss:Name="Print_Area"/></Cell>
    <Cell><Data ss:Type="Number">9792686</Data><NamedCell ss:Name="Print_Area"/></Cell>
   </Row>
   <Row>
    <Cell><Data ss:Type="String">YAL005C</Data><NamedCell ss:Name="Print_Area"/></Cell>
    <Cell><Data ss:Type="String">YNL064C</Data><NamedCell ss:Name="Print_Area"/></Cell>
    <Cell><Data ss:Type="String">copurification</Data><NamedCell
      ss:Name="Print_Area"/></Cell>
    <Cell><Data ss:Type="Number">7673245</Data><NamedCell ss:Name="Print_Area"/></Cell>
   </Row>
   <Row>
    <Cell><Data ss:Type="String">YAL005C</Data><NamedCell ss:Name="Print_Area"/></Cell>
    <Cell><Data ss:Type="String">YNL064C</Data><NamedCell ss:Name="Print_Area"/></Cell>
    <Cell><Data ss:Type="String">affinitycapturewestern</Data><NamedCell
      ss:Name="Print_Area"/></Cell>
    <Cell><Data ss:Type="Number">11014801</Data><NamedCell ss:Name="Print_Area"/></Cell>
   </Row>
   <Row>
    <Cell><Data ss:Type="String">YAL005C</Data><NamedCell ss:Name="Print_Area"/></Cell>
    <Cell><Data ss:Type="String">YNL064C</Data><NamedCell ss:Name="Print_Area"/></Cell>
    <Cell><Data ss:Type="String">unknown</Data><NamedCell ss:Name="Print_Area"/></Cell>
    <Cell><Data ss:Type="Number">1400408</Data><NamedCell ss:Name="Print_Area"/></Cell>
   </Row>
   <Row>
    <Cell><Data ss:Type="String">YAL005C</Data><NamedCell ss:Name="Print_Area"/></Cell>
    <Cell><Data ss:Type="String">YOR027W</Data><NamedCell ss:Name="Print_Area"/></Cell>
    <Cell><Data ss:Type="String">twohybrid</Data><NamedCell ss:Name="Print_Area"/></Cell>
    <Cell><Data ss:Type="Number">12716905</Data><NamedCell ss:Name="Print_Area"/></Cell>
   </Row>
   <Row>
    <Cell><Data ss:Type="String">YAL005C</Data><NamedCell ss:Name="Print_Area"/></Cell>
    <Cell><Data ss:Type="String">YOR027W</Data><NamedCell ss:Name="Print_Area"/></Cell>
    <Cell><Data ss:Type="String">reconstitutedcomplex</Data><NamedCell
      ss:Name="Print_Area"/></Cell>
    <Cell><Data ss:Type="Number">12716905</Data><NamedCell ss:Name="Print_Area"/></Cell>
   </Row>
   <Row>
    <Cell><Data ss:Type="String">YAL005C</Data><NamedCell ss:Name="Print_Area"/></Cell>
    <Cell><Data ss:Type="String">YOR027W</Data><NamedCell ss:Name="Print_Area"/></Cell>
    <Cell><Data ss:Type="String">affinitycapturewestern</Data><NamedCell
      ss:Name="Print_Area"/></Cell>
    <Cell><Data ss:Type="Number">16219779</Data><NamedCell ss:Name="Print_Area"/></Cell>
   </Row>
   <Row>
    <Cell><Data ss:Type="String">YAL005C</Data><NamedCell ss:Name="Print_Area"/></Cell>
    <Cell><Data ss:Type="String">YOR098C</Data><NamedCell ss:Name="Print_Area"/></Cell>
    <Cell><Data ss:Type="String">affinitycapturems</Data><NamedCell
      ss:Name="Print_Area"/></Cell>
    <Cell><Data ss:Type="Number">11387327</Data><NamedCell ss:Name="Print_Area"/></Cell>
   </Row>
   <Row>
    <Cell><Data ss:Type="String">YAL005C</Data><NamedCell ss:Name="Print_Area"/></Cell>
    <Cell><Data ss:Type="String">YOR098C</Data><NamedCell ss:Name="Print_Area"/></Cell>
    <Cell><Data ss:Type="String">reconstitutedcomplex</Data><NamedCell
      ss:Name="Print_Area"/></Cell>
    <Cell><Data ss:Type="Number">11387327</Data><NamedCell ss:Name="Print_Area"/></Cell>
   </Row>
   <Row>
    <Cell><Data ss:Type="String">YAL005C</Data><NamedCell ss:Name="Print_Area"/></Cell>
    <Cell><Data ss:Type="String">YPL106C</Data><NamedCell ss:Name="Print_Area"/></Cell>
    <Cell><Data ss:Type="String">affinitycapturewestern</Data><NamedCell
      ss:Name="Print_Area"/></Cell>
    <Cell><Data ss:Type="Number">16219770</Data><NamedCell ss:Name="Print_Area"/></Cell>
   </Row>
   <Row>
    <Cell><Data ss:Type="String">YAL005C</Data><NamedCell ss:Name="Print_Area"/></Cell>
    <Cell><Data ss:Type="String">YPL106C</Data><NamedCell ss:Name="Print_Area"/></Cell>
    <Cell><Data ss:Type="String">reconstitutedcomplex</Data><NamedCell
      ss:Name="Print_Area"/></Cell>
    <Cell><Data ss:Type="Number">16221677</Data><NamedCell ss:Name="Print_Area"/></Cell>
   </Row>
   <Row>
    <Cell><Data ss:Type="String">YAL005C</Data><NamedCell ss:Name="Print_Area"/></Cell>
    <Cell><Data ss:Type="String">YPL106C</Data><NamedCell ss:Name="Print_Area"/></Cell>
    <Cell><Data ss:Type="String">affinitycapturems</Data><NamedCell
      ss:Name="Print_Area"/></Cell>
    <Cell><Data ss:Type="Number">16219770</Data><NamedCell ss:Name="Print_Area"/></Cell>
   </Row>
   <Row>
    <Cell><Data ss:Type="String">YAL005C</Data><NamedCell ss:Name="Print_Area"/></Cell>
    <Cell><Data ss:Type="String">YPL106C</Data><NamedCell ss:Name="Print_Area"/></Cell>
    <Cell><Data ss:Type="String">affinitycapturewestern</Data><NamedCell
      ss:Name="Print_Area"/></Cell>
    <Cell><Data ss:Type="Number">16221677</Data><NamedCell ss:Name="Print_Area"/></Cell>
   </Row>
   <Row>
    <Cell><Data ss:Type="String">YAL005C</Data><NamedCell ss:Name="Print_Area"/></Cell>
    <Cell><Data ss:Type="String">YPL106C</Data><NamedCell ss:Name="Print_Area"/></Cell>
    <Cell><Data ss:Type="String">cofractionation</Data><NamedCell
      ss:Name="Print_Area"/></Cell>
    <Cell><Data ss:Type="Number">16219770</Data><NamedCell ss:Name="Print_Area"/></Cell>
   </Row>
   <Row>
    <Cell><Data ss:Type="String">YAL005C</Data><NamedCell ss:Name="Print_Area"/></Cell>
    <Cell><Data ss:Type="String">YPL240C</Data><NamedCell ss:Name="Print_Area"/></Cell>
    <Cell><Data ss:Type="String">affinitycapturems</Data><NamedCell
      ss:Name="Print_Area"/></Cell>
    <Cell><Data ss:Type="Number">15766533</Data><NamedCell ss:Name="Print_Area"/></Cell>
   </Row>
   <Row>
    <Cell><Data ss:Type="String">YAL005C</Data><NamedCell ss:Name="Print_Area"/></Cell>
    <Cell><Data ss:Type="String">YPL240C</Data><NamedCell ss:Name="Print_Area"/></Cell>
    <Cell><Data ss:Type="String">unknown</Data><NamedCell ss:Name="Print_Area"/></Cell>
    <Cell><Data ss:Type="Number">7929182</Data><NamedCell ss:Name="Print_Area"/></Cell>
   </Row>
   <Row>
    <Cell><Data ss:Type="String">YAL005C</Data><NamedCell ss:Name="Print_Area"/></Cell>
    <Cell><Data ss:Type="String">YPL240C</Data><NamedCell ss:Name="Print_Area"/></Cell>
    <Cell><Data ss:Type="String">reconstitutedcomplex</Data><NamedCell
      ss:Name="Print_Area"/></Cell>
    <Cell><Data ss:Type="Number">10564510</Data><NamedCell ss:Name="Print_Area"/></Cell>
   </Row>
   <Row>
    <Cell><Data ss:Type="String">YAL005C</Data><NamedCell ss:Name="Print_Area"/></Cell>
    <Cell><Data ss:Type="String">YPL240C</Data><NamedCell ss:Name="Print_Area"/></Cell>
    <Cell><Data ss:Type="String">reconstitutedcomplex</Data><NamedCell
      ss:Name="Print_Area"/></Cell>
    <Cell><Data ss:Type="Number">7929182</Data><NamedCell ss:Name="Print_Area"/></Cell>
   </Row>
   <Row>
    <Cell><Data ss:Type="String">YAL007C</Data><NamedCell ss:Name="Print_Area"/></Cell>
    <Cell><Data ss:Type="String">YAR002C-A</Data><NamedCell ss:Name="Print_Area"/></Cell>
    <Cell><Data ss:Type="String">cofractionation</Data><NamedCell
      ss:Name="Print_Area"/></Cell>
    <Cell><Data ss:Type="Number">10359606</Data><NamedCell ss:Name="Print_Area"/></Cell>
   </Row>
   <Row>
    <Cell><Data ss:Type="String">YAL007C</Data><NamedCell ss:Name="Print_Area"/></Cell>
    <Cell><Data ss:Type="String">YAR002C-A</Data><NamedCell ss:Name="Print_Area"/></Cell>
    <Cell><Data ss:Type="String">cofractionation</Data><NamedCell
      ss:Name="Print_Area"/></Cell>
    <Cell><Data ss:Type="Number">11157978</Data><NamedCell ss:Name="Print_Area"/></Cell>
   </Row>
   <Row>
    <Cell><Data ss:Type="String">YAL007C</Data><NamedCell ss:Name="Print_Area"/></Cell>
    <Cell><Data ss:Type="String">YAR002C-A</Data><NamedCell ss:Name="Print_Area"/></Cell>
    <Cell><Data ss:Type="String">affinitycapturewestern</Data><NamedCell
      ss:Name="Print_Area"/></Cell>
    <Cell><Data ss:Type="Number">10359606</Data><NamedCell ss:Name="Print_Area"/></Cell>
   </Row>
   <Row>
    <Cell><Data ss:Type="String">YAL007C</Data><NamedCell ss:Name="Print_Area"/></Cell>
    <Cell><Data ss:Type="String">YAR002C-A</Data><NamedCell ss:Name="Print_Area"/></Cell>
    <Cell><Data ss:Type="String">affinitycapturems</Data><NamedCell
      ss:Name="Print_Area"/></Cell>
    <Cell><Data ss:Type="Number">11805826</Data><NamedCell ss:Name="Print_Area"/></Cell>
   </Row>
   <Row>
    <Cell><Data ss:Type="String">YAL007C</Data><NamedCell ss:Name="Print_Area"/></Cell>
    <Cell><Data ss:Type="String">YAR002C-A</Data><NamedCell ss:Name="Print_Area"/></Cell>
    <Cell><Data ss:Type="String">affinitycapturems</Data><NamedCell
      ss:Name="Print_Area"/></Cell>
    <Cell><Data ss:Type="Number">16429126</Data><NamedCell ss:Name="Print_Area"/></Cell>
   </Row>
   <Row>
    <Cell><Data ss:Type="String">YAL009W</Data><NamedCell ss:Name="Print_Area"/></Cell>
    <Cell><Data ss:Type="String">YHR004C</Data><NamedCell ss:Name="Print_Area"/></Cell>
    <Cell><Data ss:Type="String">affinitycapturewestern</Data><NamedCell
      ss:Name="Print_Area"/></Cell>
    <Cell><Data ss:Type="Number">9822591</Data><NamedCell ss:Name="Print_Area"/></Cell>
   </Row>
   <Row>
    <Cell><Data ss:Type="String">YAL009W</Data><NamedCell ss:Name="Print_Area"/></Cell>
    <Cell><Data ss:Type="String">YHR004C</Data><NamedCell ss:Name="Print_Area"/></Cell>
    <Cell><Data ss:Type="String">reconstitutedcomplex</Data><NamedCell
      ss:Name="Print_Area"/></Cell>
    <Cell><Data ss:Type="Number">9822591</Data><NamedCell ss:Name="Print_Area"/></Cell>
   </Row>
   <Row>
    <Cell><Data ss:Type="String">YAL009W</Data><NamedCell ss:Name="Print_Area"/></Cell>
    <Cell><Data ss:Type="String">YHR004C</Data><NamedCell ss:Name="Print_Area"/></Cell>
    <Cell><Data ss:Type="String">affinitycapturems</Data><NamedCell
      ss:Name="Print_Area"/></Cell>
    <Cell><Data ss:Type="Number">16429126</Data><NamedCell ss:Name="Print_Area"/></Cell>
   </Row>
   <Row>
    <Cell><Data ss:Type="String">YAL009W</Data><NamedCell ss:Name="Print_Area"/></Cell>
    <Cell><Data ss:Type="String">YHR004C</Data><NamedCell ss:Name="Print_Area"/></Cell>
    <Cell><Data ss:Type="String">copurification</Data><NamedCell
      ss:Name="Print_Area"/></Cell>
    <Cell><Data ss:Type="Number">9822591</Data><NamedCell ss:Name="Print_Area"/></Cell>
   </Row>
   <Row>
    <Cell><Data ss:Type="String">YAL009W</Data><NamedCell ss:Name="Print_Area"/></Cell>
    <Cell><Data ss:Type="String">YHR004C</Data><NamedCell ss:Name="Print_Area"/></Cell>
    <Cell><Data ss:Type="String">unknown</Data><NamedCell ss:Name="Print_Area"/></Cell>
    <Cell><Data ss:Type="Number">9822591</Data><NamedCell ss:Name="Print_Area"/></Cell>
   </Row>
   <Row>
    <Cell><Data ss:Type="String">YAL009W</Data><NamedCell ss:Name="Print_Area"/></Cell>
    <Cell><Data ss:Type="String">YHR004C</Data><NamedCell ss:Name="Print_Area"/></Cell>
    <Cell><Data ss:Type="String">affinitycapturems</Data><NamedCell
      ss:Name="Print_Area"/></Cell>
    <Cell><Data ss:Type="Number">11805826</Data><NamedCell ss:Name="Print_Area"/></Cell>
   </Row>
   <Row>
    <Cell><Data ss:Type="String">YAL011W</Data><NamedCell ss:Name="Print_Area"/></Cell>
    <Cell><Data ss:Type="String">YDR334W</Data><NamedCell ss:Name="Print_Area"/></Cell>
    <Cell><Data ss:Type="String">affinitycapturems</Data><NamedCell
      ss:Name="Print_Area"/></Cell>
    <Cell><Data ss:Type="Number">14645854</Data><NamedCell ss:Name="Print_Area"/></Cell>
   </Row>
   <Row>
    <Cell><Data ss:Type="String">YAL011W</Data><NamedCell ss:Name="Print_Area"/></Cell>
    <Cell><Data ss:Type="String">YDR334W</Data><NamedCell ss:Name="Print_Area"/></Cell>
    <Cell><Data ss:Type="String">affinitycapturems</Data><NamedCell
      ss:Name="Print_Area"/></Cell>
    <Cell><Data ss:Type="Number">15045029</Data><NamedCell ss:Name="Print_Area"/></Cell>
   </Row>
   <Row>
    <Cell><Data ss:Type="String">YAL011W</Data><NamedCell ss:Name="Print_Area"/></Cell>
    <Cell><Data ss:Type="String">YDR334W</Data><NamedCell ss:Name="Print_Area"/></Cell>
    <Cell><Data ss:Type="String">affinitycapturems</Data><NamedCell
      ss:Name="Print_Area"/></Cell>
    <Cell><Data ss:Type="Number">16554755</Data><NamedCell ss:Name="Print_Area"/></Cell>
   </Row>
   <Row>
    <Cell><Data ss:Type="String">YAL011W</Data><NamedCell ss:Name="Print_Area"/></Cell>
    <Cell><Data ss:Type="String">YJL081C</Data><NamedCell ss:Name="Print_Area"/></Cell>
    <Cell><Data ss:Type="String">affinitycapturems</Data><NamedCell
      ss:Name="Print_Area"/></Cell>
    <Cell><Data ss:Type="Number">16554755</Data><NamedCell ss:Name="Print_Area"/></Cell>
   </Row>
   <Row>
    <Cell><Data ss:Type="String">YAL011W</Data><NamedCell ss:Name="Print_Area"/></Cell>
    <Cell><Data ss:Type="String">YJL081C</Data><NamedCell ss:Name="Print_Area"/></Cell>
    <Cell><Data ss:Type="String">affinitycapturems</Data><NamedCell
      ss:Name="Print_Area"/></Cell>
    <Cell><Data ss:Type="Number">15610740</Data><NamedCell ss:Name="Print_Area"/></Cell>
   </Row>
   <Row>
    <Cell><Data ss:Type="String">YAL011W</Data><NamedCell ss:Name="Print_Area"/></Cell>
    <Cell><Data ss:Type="String">YOL012C</Data><NamedCell ss:Name="Print_Area"/></Cell>
    <Cell><Data ss:Type="String">affinitycapturems</Data><NamedCell
      ss:Name="Print_Area"/></Cell>
    <Cell><Data ss:Type="Number">14645854</Data><NamedCell ss:Name="Print_Area"/></Cell>
   </Row>
   <Row>
    <Cell><Data ss:Type="String">YAL011W</Data><NamedCell ss:Name="Print_Area"/></Cell>
    <Cell><Data ss:Type="String">YOL012C</Data><NamedCell ss:Name="Print_Area"/></Cell>
    <Cell><Data ss:Type="String">affinitycapturems</Data><NamedCell
      ss:Name="Print_Area"/></Cell>
    <Cell><Data ss:Type="Number">15045029</Data><NamedCell ss:Name="Print_Area"/></Cell>
   </Row>
   <Row>
    <Cell><Data ss:Type="String">YAL014C</Data><NamedCell ss:Name="Print_Area"/></Cell>
    <Cell><Data ss:Type="String">YER133W</Data><NamedCell ss:Name="Print_Area"/></Cell>
    <Cell><Data ss:Type="String">twohybrid</Data><NamedCell ss:Name="Print_Area"/></Cell>
    <Cell><Data ss:Type="Number">8754819</Data><NamedCell ss:Name="Print_Area"/></Cell>
   </Row>
   <Row>
    <Cell><Data ss:Type="String">YAL014C</Data><NamedCell ss:Name="Print_Area"/></Cell>
    <Cell><Data ss:Type="String">YER133W</Data><NamedCell ss:Name="Print_Area"/></Cell>
    <Cell><Data ss:Type="String">twohybrid</Data><NamedCell ss:Name="Print_Area"/></Cell>
    <Cell><Data ss:Type="Number">10790385</Data><NamedCell ss:Name="Print_Area"/></Cell>
   </Row>
   <Row>
    <Cell><Data ss:Type="String">YAL014C</Data><NamedCell ss:Name="Print_Area"/></Cell>
    <Cell><Data ss:Type="String">YMR197C</Data><NamedCell ss:Name="Print_Area"/></Cell>
    <Cell><Data ss:Type="String">unknown</Data><NamedCell ss:Name="Print_Area"/></Cell>
    <Cell><Data ss:Type="Number">12453154</Data><NamedCell ss:Name="Print_Area"/></Cell>
   </Row>
   <Row>
    <Cell><Data ss:Type="String">YAL014C</Data><NamedCell ss:Name="Print_Area"/></Cell>
    <Cell><Data ss:Type="String">YMR197C</Data><NamedCell ss:Name="Print_Area"/></Cell>
    <Cell><Data ss:Type="String">affinitycapturewestern</Data><NamedCell
      ss:Name="Print_Area"/></Cell>
    <Cell><Data ss:Type="Number">12453154</Data><NamedCell ss:Name="Print_Area"/></Cell>
   </Row>
   <Row>
    <Cell><Data ss:Type="String">YAL014C</Data><NamedCell ss:Name="Print_Area"/></Cell>
    <Cell><Data ss:Type="String">YOR036W</Data><NamedCell ss:Name="Print_Area"/></Cell>
    <Cell><Data ss:Type="String">unknown</Data><NamedCell ss:Name="Print_Area"/></Cell>
    <Cell><Data ss:Type="Number">12453154</Data><NamedCell ss:Name="Print_Area"/></Cell>
   </Row>
   <Row>
    <Cell><Data ss:Type="String">YAL014C</Data><NamedCell ss:Name="Print_Area"/></Cell>
    <Cell><Data ss:Type="String">YOR036W</Data><NamedCell ss:Name="Print_Area"/></Cell>
    <Cell><Data ss:Type="String">affinitycapturewestern</Data><NamedCell
      ss:Name="Print_Area"/></Cell>
    <Cell><Data ss:Type="Number">12453154</Data><NamedCell ss:Name="Print_Area"/></Cell>
   </Row>
   <Row>
    <Cell><Data ss:Type="String">YAL016W</Data><NamedCell ss:Name="Print_Area"/></Cell>
    <Cell><Data ss:Type="String">YDL134C</Data><NamedCell ss:Name="Print_Area"/></Cell>
    <Cell><Data ss:Type="String">unknown</Data><NamedCell ss:Name="Print_Area"/></Cell>
    <Cell><Data ss:Type="Number">9154823</Data><NamedCell ss:Name="Print_Area"/></Cell>
   </Row>
   <Row>
    <Cell><Data ss:Type="String">YAL016W</Data><NamedCell ss:Name="Print_Area"/></Cell>
    <Cell><Data ss:Type="String">YDL134C</Data><NamedCell ss:Name="Print_Area"/></Cell>
    <Cell><Data ss:Type="String">affinitycapturems</Data><NamedCell
      ss:Name="Print_Area"/></Cell>
    <Cell><Data ss:Type="Number">11805837</Data><NamedCell ss:Name="Print_Area"/></Cell>
   </Row>
   <Row>
    <Cell><Data ss:Type="String">YAL016W</Data><NamedCell ss:Name="Print_Area"/></Cell>
    <Cell><Data ss:Type="String">YDL134C</Data><NamedCell ss:Name="Print_Area"/></Cell>
    <Cell><Data ss:Type="String">affinitycapturems</Data><NamedCell
      ss:Name="Print_Area"/></Cell>
    <Cell><Data ss:Type="Number">16429126</Data><NamedCell ss:Name="Print_Area"/></Cell>
   </Row>
   <Row>
    <Cell><Data ss:Type="String">YAL016W</Data><NamedCell ss:Name="Print_Area"/></Cell>
    <Cell><Data ss:Type="String">YDL134C</Data><NamedCell ss:Name="Print_Area"/></Cell>
    <Cell><Data ss:Type="String">affinitycapturewestern</Data><NamedCell
      ss:Name="Print_Area"/></Cell>
    <Cell><Data ss:Type="Number">10329624</Data><NamedCell ss:Name="Print_Area"/></Cell>
   </Row>
   <Row>
    <Cell><Data ss:Type="String">YAL016W</Data><NamedCell ss:Name="Print_Area"/></Cell>
    <Cell><Data ss:Type="String">YDL134C</Data><NamedCell ss:Name="Print_Area"/></Cell>
    <Cell><Data ss:Type="String">affinitycapturems</Data><NamedCell
      ss:Name="Print_Area"/></Cell>
    <Cell><Data ss:Type="Number">11805826</Data><NamedCell ss:Name="Print_Area"/></Cell>
   </Row>
   <Row>
    <Cell><Data ss:Type="String">YAL016W</Data><NamedCell ss:Name="Print_Area"/></Cell>
    <Cell><Data ss:Type="String">YDL134C</Data><NamedCell ss:Name="Print_Area"/></Cell>
    <Cell><Data ss:Type="String">affinitycapturems</Data><NamedCell
      ss:Name="Print_Area"/></Cell>
    <Cell><Data ss:Type="Number">16554755</Data><NamedCell ss:Name="Print_Area"/></Cell>
   </Row>
   <Row>
    <Cell><Data ss:Type="String">YAL016W</Data><NamedCell ss:Name="Print_Area"/></Cell>
    <Cell><Data ss:Type="String">YDL134C</Data><NamedCell ss:Name="Print_Area"/></Cell>
    <Cell><Data ss:Type="String">affinitycapturewestern</Data><NamedCell
      ss:Name="Print_Area"/></Cell>
    <Cell><Data ss:Type="Number">14551259</Data><NamedCell ss:Name="Print_Area"/></Cell>
   </Row>
   <Row>
    <Cell><Data ss:Type="String">YAL016W</Data><NamedCell ss:Name="Print_Area"/></Cell>
    <Cell><Data ss:Type="String">YDL134C</Data><NamedCell ss:Name="Print_Area"/></Cell>
    <Cell><Data ss:Type="String">affinitycapturewestern</Data><NamedCell
      ss:Name="Print_Area"/></Cell>
    <Cell><Data ss:Type="Number">11038366</Data><NamedCell ss:Name="Print_Area"/></Cell>
   </Row>
   <Row>
    <Cell><Data ss:Type="String">YAL016W</Data><NamedCell ss:Name="Print_Area"/></Cell>
    <Cell><Data ss:Type="String">YDL134C</Data><NamedCell ss:Name="Print_Area"/></Cell>
    <Cell><Data ss:Type="String">copurification</Data><NamedCell
      ss:Name="Print_Area"/></Cell>
    <Cell><Data ss:Type="Number">9154823</Data><NamedCell ss:Name="Print_Area"/></Cell>
   </Row>
   <Row>
    <Cell><Data ss:Type="String">YAL016W</Data><NamedCell ss:Name="Print_Area"/></Cell>
    <Cell><Data ss:Type="String">YDL188C</Data><NamedCell ss:Name="Print_Area"/></Cell>
    <Cell><Data ss:Type="String">affinitycapturewestern</Data><NamedCell
      ss:Name="Print_Area"/></Cell>
    <Cell><Data ss:Type="Number">11060018</Data><NamedCell ss:Name="Print_Area"/></Cell>
   </Row>
   <Row>
    <Cell><Data ss:Type="String">YAL016W</Data><NamedCell ss:Name="Print_Area"/></Cell>
    <Cell><Data ss:Type="String">YDL188C</Data><NamedCell ss:Name="Print_Area"/></Cell>
    <Cell><Data ss:Type="String">affinitycapturems</Data><NamedCell
      ss:Name="Print_Area"/></Cell>
    <Cell><Data ss:Type="Number">11805837</Data><NamedCell ss:Name="Print_Area"/></Cell>
   </Row>
   <Row>
    <Cell><Data ss:Type="String">YAL016W</Data><NamedCell ss:Name="Print_Area"/></Cell>
    <Cell><Data ss:Type="String">YDL188C</Data><NamedCell ss:Name="Print_Area"/></Cell>
    <Cell><Data ss:Type="String">affinitycapturems</Data><NamedCell
      ss:Name="Print_Area"/></Cell>
    <Cell><Data ss:Type="Number">16429126</Data><NamedCell ss:Name="Print_Area"/></Cell>
   </Row>
   <Row>
    <Cell><Data ss:Type="String">YAL016W</Data><NamedCell ss:Name="Print_Area"/></Cell>
    <Cell><Data ss:Type="String">YDL188C</Data><NamedCell ss:Name="Print_Area"/></Cell>
    <Cell><Data ss:Type="String">affinitycapturewestern</Data><NamedCell
      ss:Name="Print_Area"/></Cell>
    <Cell><Data ss:Type="Number">10329624</Data><NamedCell ss:Name="Print_Area"/></Cell>
   </Row>
   <Row>
    <Cell><Data ss:Type="String">YAL016W</Data><NamedCell ss:Name="Print_Area"/></Cell>
    <Cell><Data ss:Type="String">YDL188C</Data><NamedCell ss:Name="Print_Area"/></Cell>
    <Cell><Data ss:Type="String">affinitycapturewestern</Data><NamedCell
      ss:Name="Print_Area"/></Cell>
    <Cell><Data ss:Type="Number">11129046</Data><NamedCell ss:Name="Print_Area"/></Cell>
   </Row>
   <Row>
    <Cell><Data ss:Type="String">YAL016W</Data><NamedCell ss:Name="Print_Area"/></Cell>
    <Cell><Data ss:Type="String">YDL188C</Data><NamedCell ss:Name="Print_Area"/></Cell>
    <Cell><Data ss:Type="String">affinitycapturems</Data><NamedCell
      ss:Name="Print_Area"/></Cell>
    <Cell><Data ss:Type="Number">11805826</Data><NamedCell ss:Name="Print_Area"/></Cell>
   </Row>
   <Row>
    <Cell><Data ss:Type="String">YAL016W</Data><NamedCell ss:Name="Print_Area"/></Cell>
    <Cell><Data ss:Type="String">YGL190C</Data><NamedCell ss:Name="Print_Area"/></Cell>
    <Cell><Data ss:Type="String">affinitycapturewestern</Data><NamedCell
      ss:Name="Print_Area"/></Cell>
    <Cell><Data ss:Type="Number">10329624</Data><NamedCell ss:Name="Print_Area"/></Cell>
   </Row>
   <Row>
    <Cell><Data ss:Type="String">YAL016W</Data><NamedCell ss:Name="Print_Area"/></Cell>
    <Cell><Data ss:Type="String">YGL190C</Data><NamedCell ss:Name="Print_Area"/></Cell>
    <Cell><Data ss:Type="String">affinitycapturems</Data><NamedCell
      ss:Name="Print_Area"/></Cell>
    <Cell><Data ss:Type="Number">16429126</Data><NamedCell ss:Name="Print_Area"/></Cell>
   </Row>
   <Row>
    <Cell><Data ss:Type="String">YAL016W</Data><NamedCell ss:Name="Print_Area"/></Cell>
    <Cell><Data ss:Type="String">YGL190C</Data><NamedCell ss:Name="Print_Area"/></Cell>
    <Cell><Data ss:Type="String">affinitycapturewestern</Data><NamedCell
      ss:Name="Print_Area"/></Cell>
    <Cell><Data ss:Type="Number">15347656</Data><NamedCell ss:Name="Print_Area"/></Cell>
   </Row>
   <Row>
    <Cell><Data ss:Type="String">YAL016W</Data><NamedCell ss:Name="Print_Area"/></Cell>
    <Cell><Data ss:Type="String">YGL190C</Data><NamedCell ss:Name="Print_Area"/></Cell>
    <Cell><Data ss:Type="String">affinitycapturems</Data><NamedCell
      ss:Name="Print_Area"/></Cell>
    <Cell><Data ss:Type="Number">11805826</Data><NamedCell ss:Name="Print_Area"/></Cell>
   </Row>
   <Row>
    <Cell><Data ss:Type="String">YAL016W</Data><NamedCell ss:Name="Print_Area"/></Cell>
    <Cell><Data ss:Type="String">YGL190C</Data><NamedCell ss:Name="Print_Area"/></Cell>
    <Cell><Data ss:Type="String">affinitycapturems</Data><NamedCell
      ss:Name="Print_Area"/></Cell>
    <Cell><Data ss:Type="Number">11805837</Data><NamedCell ss:Name="Print_Area"/></Cell>
   </Row>
   <Row>
    <Cell><Data ss:Type="String">YAL016W</Data><NamedCell ss:Name="Print_Area"/></Cell>
    <Cell><Data ss:Type="String">YIL153W</Data><NamedCell ss:Name="Print_Area"/></Cell>
    <Cell><Data ss:Type="String">affinitycapturewestern</Data><NamedCell
      ss:Name="Print_Area"/></Cell>
    <Cell><Data ss:Type="Number">15689491</Data><NamedCell ss:Name="Print_Area"/></Cell>
   </Row>
   <Row>
    <Cell><Data ss:Type="String">YAL016W</Data><NamedCell ss:Name="Print_Area"/></Cell>
    <Cell><Data ss:Type="String">YOR014W</Data><NamedCell ss:Name="Print_Area"/></Cell>
    <Cell><Data ss:Type="String">affinitycapturems</Data><NamedCell
      ss:Name="Print_Area"/></Cell>
    <Cell><Data ss:Type="Number">16554755</Data><NamedCell ss:Name="Print_Area"/></Cell>
   </Row>
   <Row>
    <Cell><Data ss:Type="String">YAL016W</Data><NamedCell ss:Name="Print_Area"/></Cell>
    <Cell><Data ss:Type="String">YOR014W</Data><NamedCell ss:Name="Print_Area"/></Cell>
    <Cell><Data ss:Type="String">affinitycapturems</Data><NamedCell
      ss:Name="Print_Area"/></Cell>
    <Cell><Data ss:Type="Number">11805826</Data><NamedCell ss:Name="Print_Area"/></Cell>
   </Row>
   <Row>
    <Cell><Data ss:Type="String">YAL016W</Data><NamedCell ss:Name="Print_Area"/></Cell>
    <Cell><Data ss:Type="String">YOR014W</Data><NamedCell ss:Name="Print_Area"/></Cell>
    <Cell><Data ss:Type="String">unknown</Data><NamedCell ss:Name="Print_Area"/></Cell>
    <Cell><Data ss:Type="Number">9154823</Data><NamedCell ss:Name="Print_Area"/></Cell>
   </Row>
   <Row>
    <Cell><Data ss:Type="String">YAL016W</Data><NamedCell ss:Name="Print_Area"/></Cell>
    <Cell><Data ss:Type="String">YOR014W</Data><NamedCell ss:Name="Print_Area"/></Cell>
    <Cell><Data ss:Type="String">affinitycapturems</Data><NamedCell
      ss:Name="Print_Area"/></Cell>
    <Cell><Data ss:Type="Number">16429126</Data><NamedCell ss:Name="Print_Area"/></Cell>
   </Row>
   <Row>
    <Cell><Data ss:Type="String">YAL016W</Data><NamedCell ss:Name="Print_Area"/></Cell>
    <Cell><Data ss:Type="String">YPL152W</Data><NamedCell ss:Name="Print_Area"/></Cell>
    <Cell><Data ss:Type="String">affinitycapturems</Data><NamedCell
      ss:Name="Print_Area"/></Cell>
    <Cell><Data ss:Type="Number">11805826</Data><NamedCell ss:Name="Print_Area"/></Cell>
   </Row>
   <Row>
    <Cell><Data ss:Type="String">YAL016W</Data><NamedCell ss:Name="Print_Area"/></Cell>
    <Cell><Data ss:Type="String">YPL152W</Data><NamedCell ss:Name="Print_Area"/></Cell>
    <Cell><Data ss:Type="String">affinitycapturewestern</Data><NamedCell
      ss:Name="Print_Area"/></Cell>
    <Cell><Data ss:Type="Number">15689491</Data><NamedCell ss:Name="Print_Area"/></Cell>
   </Row>
   <Row>
    <Cell><Data ss:Type="String">YAL016W</Data><NamedCell ss:Name="Print_Area"/></Cell>
    <Cell><Data ss:Type="String">YPL152W</Data><NamedCell ss:Name="Print_Area"/></Cell>
    <Cell><Data ss:Type="String">affinitycapturems</Data><NamedCell
      ss:Name="Print_Area"/></Cell>
    <Cell><Data ss:Type="Number">16429126</Data><NamedCell ss:Name="Print_Area"/></Cell>
   </Row>
   <Row>
    <Cell><Data ss:Type="String">YAL016W</Data><NamedCell ss:Name="Print_Area"/></Cell>
    <Cell><Data ss:Type="String">YPL152W</Data><NamedCell ss:Name="Print_Area"/></Cell>
    <Cell><Data ss:Type="String">affinitycapturems</Data><NamedCell
      ss:Name="Print_Area"/></Cell>
    <Cell><Data ss:Type="Number">16554755</Data><NamedCell ss:Name="Print_Area"/></Cell>
   </Row>
   <Row>
    <Cell><Data ss:Type="String">YAL019W</Data><NamedCell ss:Name="Print_Area"/></Cell>
    <Cell><Data ss:Type="String">YBR160W</Data><NamedCell ss:Name="Print_Area"/></Cell>
    <Cell><Data ss:Type="String">reconstitutedcomplex</Data><NamedCell
      ss:Name="Print_Area"/></Cell>
    <Cell><Data ss:Type="Number">14574415</Data><NamedCell ss:Name="Print_Area"/></Cell>
   </Row>
   <Row>
    <Cell><Data ss:Type="String">YAL019W</Data><NamedCell ss:Name="Print_Area"/></Cell>
    <Cell><Data ss:Type="String">YBR160W</Data><NamedCell ss:Name="Print_Area"/></Cell>
    <Cell><Data ss:Type="String">biochemicalactivity</Data><NamedCell
      ss:Name="Print_Area"/></Cell>
    <Cell><Data ss:Type="Number">14574415</Data><NamedCell ss:Name="Print_Area"/></Cell>
   </Row>
   <Row>
    <Cell><Data ss:Type="String">YAL020C</Data><NamedCell ss:Name="Print_Area"/></Cell>
    <Cell><Data ss:Type="String">YKR048C</Data><NamedCell ss:Name="Print_Area"/></Cell>
    <Cell><Data ss:Type="String">affinitycapturewestern</Data><NamedCell
      ss:Name="Print_Area"/></Cell>
    <Cell><Data ss:Type="Number">13680156</Data><NamedCell ss:Name="Print_Area"/></Cell>
   </Row>
   <Row>
    <Cell><Data ss:Type="String">YAL020C</Data><NamedCell ss:Name="Print_Area"/></Cell>
    <Cell><Data ss:Type="String">YKR048C</Data><NamedCell ss:Name="Print_Area"/></Cell>
    <Cell><Data ss:Type="String">twohybrid</Data><NamedCell ss:Name="Print_Area"/></Cell>
    <Cell><Data ss:Type="Number">13680156</Data><NamedCell ss:Name="Print_Area"/></Cell>
   </Row>
   <Row>
    <Cell><Data ss:Type="String">YAL021C</Data><NamedCell ss:Name="Print_Area"/></Cell>
    <Cell><Data ss:Type="String">YCR093W</Data><NamedCell ss:Name="Print_Area"/></Cell>
    <Cell><Data ss:Type="String">affinitycapturems</Data><NamedCell
      ss:Name="Print_Area"/></Cell>
    <Cell><Data ss:Type="Number">16429126</Data><NamedCell ss:Name="Print_Area"/></Cell>
   </Row>
   <Row>
    <Cell><Data ss:Type="String">YAL021C</Data><NamedCell ss:Name="Print_Area"/></Cell>
    <Cell><Data ss:Type="String">YCR093W</Data><NamedCell ss:Name="Print_Area"/></Cell>
    <Cell><Data ss:Type="String">affinitycapturems</Data><NamedCell
      ss:Name="Print_Area"/></Cell>
    <Cell><Data ss:Type="Number">11733989</Data><NamedCell ss:Name="Print_Area"/></Cell>
   </Row>
   <Row>
    <Cell><Data ss:Type="String">YAL021C</Data><NamedCell ss:Name="Print_Area"/></Cell>
    <Cell><Data ss:Type="String">YCR093W</Data><NamedCell ss:Name="Print_Area"/></Cell>
    <Cell><Data ss:Type="String">affinitycapturewestern</Data><NamedCell
      ss:Name="Print_Area"/></Cell>
    <Cell><Data ss:Type="Number">9463387</Data><NamedCell ss:Name="Print_Area"/></Cell>
   </Row>
   <Row>
    <Cell><Data ss:Type="String">YAL021C</Data><NamedCell ss:Name="Print_Area"/></Cell>
    <Cell><Data ss:Type="String">YCR093W</Data><NamedCell ss:Name="Print_Area"/></Cell>
    <Cell><Data ss:Type="String">twohybrid</Data><NamedCell ss:Name="Print_Area"/></Cell>
    <Cell><Data ss:Type="Number">9463387</Data><NamedCell ss:Name="Print_Area"/></Cell>
   </Row>
   <Row>
    <Cell><Data ss:Type="String">YAL021C</Data><NamedCell ss:Name="Print_Area"/></Cell>
    <Cell><Data ss:Type="String">YCR093W</Data><NamedCell ss:Name="Print_Area"/></Cell>
    <Cell><Data ss:Type="String">affinitycapturems</Data><NamedCell
      ss:Name="Print_Area"/></Cell>
    <Cell><Data ss:Type="Number">11805837</Data><NamedCell ss:Name="Print_Area"/></Cell>
   </Row>
   <Row>
    <Cell><Data ss:Type="String">YAL021C</Data><NamedCell ss:Name="Print_Area"/></Cell>
    <Cell><Data ss:Type="String">YCR093W</Data><NamedCell ss:Name="Print_Area"/></Cell>
    <Cell><Data ss:Type="String">affinitycapturewestern</Data><NamedCell
      ss:Name="Print_Area"/></Cell>
    <Cell><Data ss:Type="Number">10490603</Data><NamedCell ss:Name="Print_Area"/></Cell>
   </Row>
   <Row>
    <Cell><Data ss:Type="String">YAL021C</Data><NamedCell ss:Name="Print_Area"/></Cell>
    <Cell><Data ss:Type="String">YCR093W</Data><NamedCell ss:Name="Print_Area"/></Cell>
    <Cell><Data ss:Type="String">affinitycapturems</Data><NamedCell
      ss:Name="Print_Area"/></Cell>
    <Cell><Data ss:Type="Number">11805826</Data><NamedCell ss:Name="Print_Area"/></Cell>
   </Row>
   <Row>
    <Cell><Data ss:Type="String">YAL021C</Data><NamedCell ss:Name="Print_Area"/></Cell>
    <Cell><Data ss:Type="String">YCR093W</Data><NamedCell ss:Name="Print_Area"/></Cell>
    <Cell><Data ss:Type="String">copurification</Data><NamedCell
      ss:Name="Print_Area"/></Cell>
    <Cell><Data ss:Type="Number">11733989</Data><NamedCell ss:Name="Print_Area"/></Cell>
   </Row>
   <Row>
    <Cell><Data ss:Type="String">YAL021C</Data><NamedCell ss:Name="Print_Area"/></Cell>
    <Cell><Data ss:Type="String">YCR093W</Data><NamedCell ss:Name="Print_Area"/></Cell>
    <Cell><Data ss:Type="String">affinitycapturewestern</Data><NamedCell
      ss:Name="Print_Area"/></Cell>
    <Cell><Data ss:Type="Number">11023781</Data><NamedCell ss:Name="Print_Area"/></Cell>
   </Row>
   <Row>
    <Cell><Data ss:Type="String">YAL021C</Data><NamedCell ss:Name="Print_Area"/></Cell>
    <Cell><Data ss:Type="String">YCR093W</Data><NamedCell ss:Name="Print_Area"/></Cell>
    <Cell><Data ss:Type="String">copurification</Data><NamedCell
      ss:Name="Print_Area"/></Cell>
    <Cell><Data ss:Type="Number">9463387</Data><NamedCell ss:Name="Print_Area"/></Cell>
   </Row>
   <Row>
    <Cell><Data ss:Type="String">YAL021C</Data><NamedCell ss:Name="Print_Area"/></Cell>
    <Cell><Data ss:Type="String">YCR093W</Data><NamedCell ss:Name="Print_Area"/></Cell>
    <Cell><Data ss:Type="String">affinitycapturems</Data><NamedCell
      ss:Name="Print_Area"/></Cell>
    <Cell><Data ss:Type="Number">14759368</Data><NamedCell ss:Name="Print_Area"/></Cell>
   </Row>
   <Row>
    <Cell><Data ss:Type="String">YAL021C</Data><NamedCell ss:Name="Print_Area"/></Cell>
    <Cell><Data ss:Type="String">YDL165W</Data><NamedCell ss:Name="Print_Area"/></Cell>
    <Cell><Data ss:Type="String">affinitycapturewestern</Data><NamedCell
      ss:Name="Print_Area"/></Cell>
    <Cell><Data ss:Type="Number">10490603</Data><NamedCell ss:Name="Print_Area"/></Cell>
   </Row>
   <Row>
    <Cell><Data ss:Type="String">YAL021C</Data><NamedCell ss:Name="Print_Area"/></Cell>
    <Cell><Data ss:Type="String">YDL165W</Data><NamedCell ss:Name="Print_Area"/></Cell>
    <Cell><Data ss:Type="String">copurification</Data><NamedCell
      ss:Name="Print_Area"/></Cell>
    <Cell><Data ss:Type="Number">11733989</Data><NamedCell ss:Name="Print_Area"/></Cell>
   </Row>
   <Row>
    <Cell><Data ss:Type="String">YAL021C</Data><NamedCell ss:Name="Print_Area"/></Cell>
    <Cell><Data ss:Type="String">YDL165W</Data><NamedCell ss:Name="Print_Area"/></Cell>
    <Cell><Data ss:Type="String">affinitycapturems</Data><NamedCell
      ss:Name="Print_Area"/></Cell>
    <Cell><Data ss:Type="Number">11733989</Data><NamedCell ss:Name="Print_Area"/></Cell>
   </Row>
   <Row>
    <Cell><Data ss:Type="String">YAL021C</Data><NamedCell ss:Name="Print_Area"/></Cell>
    <Cell><Data ss:Type="String">YDL165W</Data><NamedCell ss:Name="Print_Area"/></Cell>
    <Cell><Data ss:Type="String">twohybrid</Data><NamedCell ss:Name="Print_Area"/></Cell>
    <Cell><Data ss:Type="Number">9463387</Data><NamedCell ss:Name="Print_Area"/></Cell>
   </Row>
   <Row>
    <Cell><Data ss:Type="String">YAL021C</Data><NamedCell ss:Name="Print_Area"/></Cell>
    <Cell><Data ss:Type="String">YDL165W</Data><NamedCell ss:Name="Print_Area"/></Cell>
    <Cell><Data ss:Type="String">affinitycapturewestern</Data><NamedCell
      ss:Name="Print_Area"/></Cell>
    <Cell><Data ss:Type="Number">9463387</Data><NamedCell ss:Name="Print_Area"/></Cell>
   </Row>
   <Row>
    <Cell><Data ss:Type="String">YAL021C</Data><NamedCell ss:Name="Print_Area"/></Cell>
    <Cell><Data ss:Type="String">YDR443C</Data><NamedCell ss:Name="Print_Area"/></Cell>
    <Cell><Data ss:Type="String">affinitycapturewestern</Data><NamedCell
      ss:Name="Print_Area"/></Cell>
    <Cell><Data ss:Type="Number">11113136</Data><NamedCell ss:Name="Print_Area"/></Cell>
   </Row>
   <Row>
    <Cell><Data ss:Type="String">YAL021C</Data><NamedCell ss:Name="Print_Area"/></Cell>
    <Cell><Data ss:Type="String">YDR443C</Data><NamedCell ss:Name="Print_Area"/></Cell>
    <Cell><Data ss:Type="String">twohybrid</Data><NamedCell ss:Name="Print_Area"/></Cell>
    <Cell><Data ss:Type="Number">11113136</Data><NamedCell ss:Name="Print_Area"/></Cell>
   </Row>
   <Row>
    <Cell><Data ss:Type="String">YAL021C</Data><NamedCell ss:Name="Print_Area"/></Cell>
    <Cell><Data ss:Type="String">YER068W</Data><NamedCell ss:Name="Print_Area"/></Cell>
    <Cell><Data ss:Type="String">affinitycapturems</Data><NamedCell
      ss:Name="Print_Area"/></Cell>
    <Cell><Data ss:Type="Number">11805826</Data><NamedCell ss:Name="Print_Area"/></Cell>
   </Row>
   <Row>
    <Cell><Data ss:Type="String">YAL021C</Data><NamedCell ss:Name="Print_Area"/></Cell>
    <Cell><Data ss:Type="String">YER068W</Data><NamedCell ss:Name="Print_Area"/></Cell>
    <Cell><Data ss:Type="String">affinitycapturewestern</Data><NamedCell
      ss:Name="Print_Area"/></Cell>
    <Cell><Data ss:Type="Number">10490603</Data><NamedCell ss:Name="Print_Area"/></Cell>
   </Row>
   <Row>
    <Cell><Data ss:Type="String">YAL021C</Data><NamedCell ss:Name="Print_Area"/></Cell>
    <Cell><Data ss:Type="String">YER068W</Data><NamedCell ss:Name="Print_Area"/></Cell>
    <Cell><Data ss:Type="String">copurification</Data><NamedCell
      ss:Name="Print_Area"/></Cell>
    <Cell><Data ss:Type="Number">11733989</Data><NamedCell ss:Name="Print_Area"/></Cell>
   </Row>
   <Row>
    <Cell><Data ss:Type="String">YAL021C</Data><NamedCell ss:Name="Print_Area"/></Cell>
    <Cell><Data ss:Type="String">YER068W</Data><NamedCell ss:Name="Print_Area"/></Cell>
    <Cell><Data ss:Type="String">affinitycapturems</Data><NamedCell
      ss:Name="Print_Area"/></Cell>
    <Cell><Data ss:Type="Number">16429126</Data><NamedCell ss:Name="Print_Area"/></Cell>
   </Row>
   <Row>
    <Cell><Data ss:Type="String">YAL021C</Data><NamedCell ss:Name="Print_Area"/></Cell>
    <Cell><Data ss:Type="String">YER068W</Data><NamedCell ss:Name="Print_Area"/></Cell>
    <Cell><Data ss:Type="String">affinitycapturems</Data><NamedCell
      ss:Name="Print_Area"/></Cell>
    <Cell><Data ss:Type="Number">11733989</Data><NamedCell ss:Name="Print_Area"/></Cell>
   </Row>
   <Row>
    <Cell><Data ss:Type="String">YAL021C</Data><NamedCell ss:Name="Print_Area"/></Cell>
    <Cell><Data ss:Type="String">YER068W</Data><NamedCell ss:Name="Print_Area"/></Cell>
    <Cell><Data ss:Type="String">affinitycapturewestern</Data><NamedCell
      ss:Name="Print_Area"/></Cell>
    <Cell><Data ss:Type="Number">9463387</Data><NamedCell ss:Name="Print_Area"/></Cell>
   </Row>
   <Row>
    <Cell><Data ss:Type="String">YAL021C</Data><NamedCell ss:Name="Print_Area"/></Cell>
    <Cell><Data ss:Type="String">YGR092W</Data><NamedCell ss:Name="Print_Area"/></Cell>
    <Cell><Data ss:Type="String">twohybrid</Data><NamedCell ss:Name="Print_Area"/></Cell>
    <Cell><Data ss:Type="Number">9311989</Data><NamedCell ss:Name="Print_Area"/></Cell>
   </Row>
   <Row>
    <Cell><Data ss:Type="String">YAL021C</Data><NamedCell ss:Name="Print_Area"/></Cell>
    <Cell><Data ss:Type="String">YGR092W</Data><NamedCell ss:Name="Print_Area"/></Cell>
    <Cell><Data ss:Type="String">twohybrid</Data><NamedCell ss:Name="Print_Area"/></Cell>
    <Cell><Data ss:Type="Number">11113136</Data><NamedCell ss:Name="Print_Area"/></Cell>
   </Row>
   <Row>
    <Cell><Data ss:Type="String">YAL021C</Data><NamedCell ss:Name="Print_Area"/></Cell>
    <Cell><Data ss:Type="String">YGR092W</Data><NamedCell ss:Name="Print_Area"/></Cell>
    <Cell><Data ss:Type="String">twohybrid</Data><NamedCell ss:Name="Print_Area"/></Cell>
    <Cell><Data ss:Type="Number">9463387</Data><NamedCell ss:Name="Print_Area"/></Cell>
   </Row>
   <Row>
    <Cell><Data ss:Type="String">YAL021C</Data><NamedCell ss:Name="Print_Area"/></Cell>
    <Cell><Data ss:Type="String">YGR092W</Data><NamedCell ss:Name="Print_Area"/></Cell>
    <Cell><Data ss:Type="String">affinitycapturewestern</Data><NamedCell
      ss:Name="Print_Area"/></Cell>
    <Cell><Data ss:Type="Number">9311989</Data><NamedCell ss:Name="Print_Area"/></Cell>
   </Row>
   <Row>
    <Cell><Data ss:Type="String">YAL021C</Data><NamedCell ss:Name="Print_Area"/></Cell>
    <Cell><Data ss:Type="String">YGR092W</Data><NamedCell ss:Name="Print_Area"/></Cell>
    <Cell><Data ss:Type="String">copurification</Data><NamedCell
      ss:Name="Print_Area"/></Cell>
    <Cell><Data ss:Type="Number">9311989</Data><NamedCell ss:Name="Print_Area"/></Cell>
   </Row>
   <Row>
    <Cell><Data ss:Type="String">YAL021C</Data><NamedCell ss:Name="Print_Area"/></Cell>
    <Cell><Data ss:Type="String">YGR092W</Data><NamedCell ss:Name="Print_Area"/></Cell>
    <Cell><Data ss:Type="String">unknown</Data><NamedCell ss:Name="Print_Area"/></Cell>
    <Cell><Data ss:Type="Number">9311989</Data><NamedCell ss:Name="Print_Area"/></Cell>
   </Row>
   <Row>
    <Cell><Data ss:Type="String">YAL021C</Data><NamedCell ss:Name="Print_Area"/></Cell>
    <Cell><Data ss:Type="String">YGR134W</Data><NamedCell ss:Name="Print_Area"/></Cell>
    <Cell><Data ss:Type="String">affinitycapturewestern</Data><NamedCell
      ss:Name="Print_Area"/></Cell>
    <Cell><Data ss:Type="Number">11733989</Data><NamedCell ss:Name="Print_Area"/></Cell>
   </Row>
   <Row>
    <Cell><Data ss:Type="String">YAL021C</Data><NamedCell ss:Name="Print_Area"/></Cell>
    <Cell><Data ss:Type="String">YGR134W</Data><NamedCell ss:Name="Print_Area"/></Cell>
    <Cell><Data ss:Type="String">affinitycapturems</Data><NamedCell
      ss:Name="Print_Area"/></Cell>
    <Cell><Data ss:Type="Number">16554755</Data><NamedCell ss:Name="Print_Area"/></Cell>
   </Row>
   <Row>
    <Cell><Data ss:Type="String">YAL021C</Data><NamedCell ss:Name="Print_Area"/></Cell>
    <Cell><Data ss:Type="String">YGR134W</Data><NamedCell ss:Name="Print_Area"/></Cell>
    <Cell><Data ss:Type="String">affinitycapturems</Data><NamedCell
      ss:Name="Print_Area"/></Cell>
    <Cell><Data ss:Type="Number">16429126</Data><NamedCell ss:Name="Print_Area"/></Cell>
   </Row>
   <Row>
    <Cell><Data ss:Type="String">YAL021C</Data><NamedCell ss:Name="Print_Area"/></Cell>
    <Cell><Data ss:Type="String">YGR134W</Data><NamedCell ss:Name="Print_Area"/></Cell>
    <Cell><Data ss:Type="String">affinitycapturems</Data><NamedCell
      ss:Name="Print_Area"/></Cell>
    <Cell><Data ss:Type="Number">11733989</Data><NamedCell ss:Name="Print_Area"/></Cell>
   </Row>
   <Row>
    <Cell><Data ss:Type="String">YAL021C</Data><NamedCell ss:Name="Print_Area"/></Cell>
    <Cell><Data ss:Type="String">YGR134W</Data><NamedCell ss:Name="Print_Area"/></Cell>
    <Cell><Data ss:Type="String">affinitycapturems</Data><NamedCell
      ss:Name="Print_Area"/></Cell>
    <Cell><Data ss:Type="Number">11805826</Data><NamedCell ss:Name="Print_Area"/></Cell>
   </Row>
   <Row>
    <Cell><Data ss:Type="String">YAL021C</Data><NamedCell ss:Name="Print_Area"/></Cell>
    <Cell><Data ss:Type="String">YGR134W</Data><NamedCell ss:Name="Print_Area"/></Cell>
    <Cell><Data ss:Type="String">copurification</Data><NamedCell
      ss:Name="Print_Area"/></Cell>
    <Cell><Data ss:Type="Number">11733989</Data><NamedCell ss:Name="Print_Area"/></Cell>
   </Row>
   <Row>
    <Cell><Data ss:Type="String">YAL021C</Data><NamedCell ss:Name="Print_Area"/></Cell>
    <Cell><Data ss:Type="String">YNL288W</Data><NamedCell ss:Name="Print_Area"/></Cell>
    <Cell><Data ss:Type="String">affinitycapturems</Data><NamedCell
      ss:Name="Print_Area"/></Cell>
    <Cell><Data ss:Type="Number">11733989</Data><NamedCell ss:Name="Print_Area"/></Cell>
   </Row>
   <Row>
    <Cell><Data ss:Type="String">YAL021C</Data><NamedCell ss:Name="Print_Area"/></Cell>
    <Cell><Data ss:Type="String">YNL288W</Data><NamedCell ss:Name="Print_Area"/></Cell>
    <Cell><Data ss:Type="String">affinitycapturems</Data><NamedCell
      ss:Name="Print_Area"/></Cell>
    <Cell><Data ss:Type="Number">11805826</Data><NamedCell ss:Name="Print_Area"/></Cell>
   </Row>
   <Row>
    <Cell><Data ss:Type="String">YAL021C</Data><NamedCell ss:Name="Print_Area"/></Cell>
    <Cell><Data ss:Type="String">YNL288W</Data><NamedCell ss:Name="Print_Area"/></Cell>
    <Cell><Data ss:Type="String">copurification</Data><NamedCell
      ss:Name="Print_Area"/></Cell>
    <Cell><Data ss:Type="Number">11733989</Data><NamedCell ss:Name="Print_Area"/></Cell>
   </Row>
   <Row>
    <Cell><Data ss:Type="String">YAL021C</Data><NamedCell ss:Name="Print_Area"/></Cell>
    <Cell><Data ss:Type="String">YNL288W</Data><NamedCell ss:Name="Print_Area"/></Cell>
    <Cell><Data ss:Type="String">affinitycapturewestern</Data><NamedCell
      ss:Name="Print_Area"/></Cell>
    <Cell><Data ss:Type="Number">11733989</Data><NamedCell ss:Name="Print_Area"/></Cell>
   </Row>
   <Row>
    <Cell><Data ss:Type="String">YAL021C</Data><NamedCell ss:Name="Print_Area"/></Cell>
    <Cell><Data ss:Type="String">YNL288W</Data><NamedCell ss:Name="Print_Area"/></Cell>
    <Cell><Data ss:Type="String">affinitycapturems</Data><NamedCell
      ss:Name="Print_Area"/></Cell>
    <Cell><Data ss:Type="Number">16554755</Data><NamedCell ss:Name="Print_Area"/></Cell>
   </Row>
   <Row>
    <Cell><Data ss:Type="String">YAL021C</Data><NamedCell ss:Name="Print_Area"/></Cell>
    <Cell><Data ss:Type="String">YNL288W</Data><NamedCell ss:Name="Print_Area"/></Cell>
    <Cell><Data ss:Type="String">affinitycapturems</Data><NamedCell
      ss:Name="Print_Area"/></Cell>
    <Cell><Data ss:Type="Number">16429126</Data><NamedCell ss:Name="Print_Area"/></Cell>
   </Row>
   <Row>
    <Cell><Data ss:Type="String">YAL021C</Data><NamedCell ss:Name="Print_Area"/></Cell>
    <Cell><Data ss:Type="String">YNR052C</Data><NamedCell ss:Name="Print_Area"/></Cell>
    <Cell><Data ss:Type="String">affinitycapturems</Data><NamedCell
      ss:Name="Print_Area"/></Cell>
    <Cell><Data ss:Type="Number">11805837</Data><NamedCell ss:Name="Print_Area"/></Cell>
   </Row>
   <Row>
    <Cell><Data ss:Type="String">YAL021C</Data><NamedCell ss:Name="Print_Area"/></Cell>
    <Cell><Data ss:Type="String">YNR052C</Data><NamedCell ss:Name="Print_Area"/></Cell>
    <Cell><Data ss:Type="String">affinitycapturems</Data><NamedCell
      ss:Name="Print_Area"/></Cell>
    <Cell><Data ss:Type="Number">11805826</Data><NamedCell ss:Name="Print_Area"/></Cell>
   </Row>
   <Row>
    <Cell><Data ss:Type="String">YAL021C</Data><NamedCell ss:Name="Print_Area"/></Cell>
    <Cell><Data ss:Type="String">YNR052C</Data><NamedCell ss:Name="Print_Area"/></Cell>
    <Cell><Data ss:Type="String">affinitycapturems</Data><NamedCell
      ss:Name="Print_Area"/></Cell>
    <Cell><Data ss:Type="Number">11733989</Data><NamedCell ss:Name="Print_Area"/></Cell>
   </Row>
   <Row>
    <Cell><Data ss:Type="String">YAL021C</Data><NamedCell ss:Name="Print_Area"/></Cell>
    <Cell><Data ss:Type="String">YNR052C</Data><NamedCell ss:Name="Print_Area"/></Cell>
    <Cell><Data ss:Type="String">unknown</Data><NamedCell ss:Name="Print_Area"/></Cell>
    <Cell><Data ss:Type="Number">9311989</Data><NamedCell ss:Name="Print_Area"/></Cell>
   </Row>
   <Row>
    <Cell><Data ss:Type="String">YAL021C</Data><NamedCell ss:Name="Print_Area"/></Cell>
    <Cell><Data ss:Type="String">YNR052C</Data><NamedCell ss:Name="Print_Area"/></Cell>
    <Cell><Data ss:Type="String">affinitycapturewestern</Data><NamedCell
      ss:Name="Print_Area"/></Cell>
    <Cell><Data ss:Type="Number">11239395</Data><NamedCell ss:Name="Print_Area"/></Cell>
   </Row>
   <Row>
    <Cell><Data ss:Type="String">YAL021C</Data><NamedCell ss:Name="Print_Area"/></Cell>
    <Cell><Data ss:Type="String">YNR052C</Data><NamedCell ss:Name="Print_Area"/></Cell>
    <Cell><Data ss:Type="String">unknown</Data><NamedCell ss:Name="Print_Area"/></Cell>
    <Cell><Data ss:Type="Number">9504907</Data><NamedCell ss:Name="Print_Area"/></Cell>
   </Row>
   <Row>
    <Cell><Data ss:Type="String">YAL021C</Data><NamedCell ss:Name="Print_Area"/></Cell>
    <Cell><Data ss:Type="String">YNR052C</Data><NamedCell ss:Name="Print_Area"/></Cell>
    <Cell><Data ss:Type="String">affinitycapturewestern</Data><NamedCell
      ss:Name="Print_Area"/></Cell>
    <Cell><Data ss:Type="Number">12215412</Data><NamedCell ss:Name="Print_Area"/></Cell>
   </Row>
   <Row>
    <Cell><Data ss:Type="String">YAL021C</Data><NamedCell ss:Name="Print_Area"/></Cell>
    <Cell><Data ss:Type="String">YNR052C</Data><NamedCell ss:Name="Print_Area"/></Cell>
    <Cell><Data ss:Type="String">affinitycapturewestern</Data><NamedCell
      ss:Name="Print_Area"/></Cell>
    <Cell><Data ss:Type="Number">9504907</Data><NamedCell ss:Name="Print_Area"/></Cell>
   </Row>
   <Row>
    <Cell><Data ss:Type="String">YAL021C</Data><NamedCell ss:Name="Print_Area"/></Cell>
    <Cell><Data ss:Type="String">YNR052C</Data><NamedCell ss:Name="Print_Area"/></Cell>
    <Cell><Data ss:Type="String">twohybrid</Data><NamedCell ss:Name="Print_Area"/></Cell>
    <Cell><Data ss:Type="Number">9504907</Data><NamedCell ss:Name="Print_Area"/></Cell>
   </Row>
   <Row>
    <Cell><Data ss:Type="String">YAL021C</Data><NamedCell ss:Name="Print_Area"/></Cell>
    <Cell><Data ss:Type="String">YNR052C</Data><NamedCell ss:Name="Print_Area"/></Cell>
    <Cell><Data ss:Type="String">affinitycapturems</Data><NamedCell
      ss:Name="Print_Area"/></Cell>
    <Cell><Data ss:Type="Number">16429126</Data><NamedCell ss:Name="Print_Area"/></Cell>
   </Row>
   <Row>
    <Cell><Data ss:Type="String">YAL021C</Data><NamedCell ss:Name="Print_Area"/></Cell>
    <Cell><Data ss:Type="String">YNR052C</Data><NamedCell ss:Name="Print_Area"/></Cell>
    <Cell><Data ss:Type="String">twohybrid</Data><NamedCell ss:Name="Print_Area"/></Cell>
    <Cell><Data ss:Type="Number">7791755</Data><NamedCell ss:Name="Print_Area"/></Cell>
   </Row>
   <Row>
    <Cell><Data ss:Type="String">YAL021C</Data><NamedCell ss:Name="Print_Area"/></Cell>
    <Cell><Data ss:Type="String">YNR052C</Data><NamedCell ss:Name="Print_Area"/></Cell>
    <Cell><Data ss:Type="String">twohybrid</Data><NamedCell ss:Name="Print_Area"/></Cell>
    <Cell><Data ss:Type="Number">11113136</Data><NamedCell ss:Name="Print_Area"/></Cell>
   </Row>
   <Row>
    <Cell><Data ss:Type="String">YAL021C</Data><NamedCell ss:Name="Print_Area"/></Cell>
    <Cell><Data ss:Type="String">YNR052C</Data><NamedCell ss:Name="Print_Area"/></Cell>
    <Cell><Data ss:Type="String">copurification</Data><NamedCell
      ss:Name="Print_Area"/></Cell>
    <Cell><Data ss:Type="Number">10490603</Data><NamedCell ss:Name="Print_Area"/></Cell>
   </Row>
   <Row>
    <Cell><Data ss:Type="String">YAL021C</Data><NamedCell ss:Name="Print_Area"/></Cell>
    <Cell><Data ss:Type="String">YNR052C</Data><NamedCell ss:Name="Print_Area"/></Cell>
    <Cell><Data ss:Type="String">affinitycapturewestern</Data><NamedCell
      ss:Name="Print_Area"/></Cell>
    <Cell><Data ss:Type="Number">10490603</Data><NamedCell ss:Name="Print_Area"/></Cell>
   </Row>
   <Row>
    <Cell><Data ss:Type="String">YAL021C</Data><NamedCell ss:Name="Print_Area"/></Cell>
    <Cell><Data ss:Type="String">YNR052C</Data><NamedCell ss:Name="Print_Area"/></Cell>
    <Cell><Data ss:Type="String">affinitycapturems</Data><NamedCell
      ss:Name="Print_Area"/></Cell>
    <Cell><Data ss:Type="Number">14759368</Data><NamedCell ss:Name="Print_Area"/></Cell>
   </Row>
   <Row>
    <Cell><Data ss:Type="String">YAL021C</Data><NamedCell ss:Name="Print_Area"/></Cell>
    <Cell><Data ss:Type="String">YNR052C</Data><NamedCell ss:Name="Print_Area"/></Cell>
    <Cell><Data ss:Type="String">copurification</Data><NamedCell
      ss:Name="Print_Area"/></Cell>
    <Cell><Data ss:Type="Number">11239395</Data><NamedCell ss:Name="Print_Area"/></Cell>
   </Row>
   <Row>
    <Cell><Data ss:Type="String">YAL021C</Data><NamedCell ss:Name="Print_Area"/></Cell>
    <Cell><Data ss:Type="String">YNR052C</Data><NamedCell ss:Name="Print_Area"/></Cell>
    <Cell><Data ss:Type="String">twohybrid</Data><NamedCell ss:Name="Print_Area"/></Cell>
    <Cell><Data ss:Type="Number">9311989</Data><NamedCell ss:Name="Print_Area"/></Cell>
   </Row>
   <Row>
    <Cell><Data ss:Type="String">YAL021C</Data><NamedCell ss:Name="Print_Area"/></Cell>
    <Cell><Data ss:Type="String">YNR052C</Data><NamedCell ss:Name="Print_Area"/></Cell>
    <Cell><Data ss:Type="String">copurification</Data><NamedCell
      ss:Name="Print_Area"/></Cell>
    <Cell><Data ss:Type="Number">9311989</Data><NamedCell ss:Name="Print_Area"/></Cell>
   </Row>
   <Row>
    <Cell><Data ss:Type="String">YAL021C</Data><NamedCell ss:Name="Print_Area"/></Cell>
    <Cell><Data ss:Type="String">YNR052C</Data><NamedCell ss:Name="Print_Area"/></Cell>
    <Cell><Data ss:Type="String">affinitycapturewestern</Data><NamedCell
      ss:Name="Print_Area"/></Cell>
    <Cell><Data ss:Type="Number">14734555</Data><NamedCell ss:Name="Print_Area"/></Cell>
   </Row>
   <Row>
    <Cell><Data ss:Type="String">YAL021C</Data><NamedCell ss:Name="Print_Area"/></Cell>
    <Cell><Data ss:Type="String">YNR052C</Data><NamedCell ss:Name="Print_Area"/></Cell>
    <Cell><Data ss:Type="String">copurification</Data><NamedCell
      ss:Name="Print_Area"/></Cell>
    <Cell><Data ss:Type="Number">11733989</Data><NamedCell ss:Name="Print_Area"/></Cell>
   </Row>
   <Row>
    <Cell><Data ss:Type="String">YAL021C</Data><NamedCell ss:Name="Print_Area"/></Cell>
    <Cell><Data ss:Type="String">YNR052C</Data><NamedCell ss:Name="Print_Area"/></Cell>
    <Cell><Data ss:Type="String">affinitycapturewestern</Data><NamedCell
      ss:Name="Print_Area"/></Cell>
    <Cell><Data ss:Type="Number">7791755</Data><NamedCell ss:Name="Print_Area"/></Cell>
   </Row>
   <Row>
    <Cell><Data ss:Type="String">YAL021C</Data><NamedCell ss:Name="Print_Area"/></Cell>
    <Cell><Data ss:Type="String">YNR052C</Data><NamedCell ss:Name="Print_Area"/></Cell>
    <Cell><Data ss:Type="String">affinitycapturewestern</Data><NamedCell
      ss:Name="Print_Area"/></Cell>
    <Cell><Data ss:Type="Number">9463387</Data><NamedCell ss:Name="Print_Area"/></Cell>
   </Row>
   <Row>
    <Cell><Data ss:Type="String">YAL021C</Data><NamedCell ss:Name="Print_Area"/></Cell>
    <Cell><Data ss:Type="String">YNR052C</Data><NamedCell ss:Name="Print_Area"/></Cell>
    <Cell><Data ss:Type="String">cofractionation</Data><NamedCell
      ss:Name="Print_Area"/></Cell>
    <Cell><Data ss:Type="Number">10490603</Data><NamedCell ss:Name="Print_Area"/></Cell>
   </Row>
   <Row>
    <Cell><Data ss:Type="String">YAL021C</Data><NamedCell ss:Name="Print_Area"/></Cell>
    <Cell><Data ss:Type="String">YNR052C</Data><NamedCell ss:Name="Print_Area"/></Cell>
    <Cell><Data ss:Type="String">twohybrid</Data><NamedCell ss:Name="Print_Area"/></Cell>
    <Cell><Data ss:Type="Number">14734555</Data><NamedCell ss:Name="Print_Area"/></Cell>
   </Row>
   <Row>
    <Cell><Data ss:Type="String">YAL021C</Data><NamedCell ss:Name="Print_Area"/></Cell>
    <Cell><Data ss:Type="String">YNR052C</Data><NamedCell ss:Name="Print_Area"/></Cell>
    <Cell><Data ss:Type="String">twohybrid</Data><NamedCell ss:Name="Print_Area"/></Cell>
    <Cell><Data ss:Type="Number">9463387</Data><NamedCell ss:Name="Print_Area"/></Cell>
   </Row>
   <Row>
    <Cell><Data ss:Type="String">YAL021C</Data><NamedCell ss:Name="Print_Area"/></Cell>
    <Cell><Data ss:Type="String">YPR072W</Data><NamedCell ss:Name="Print_Area"/></Cell>
    <Cell><Data ss:Type="String">affinitycapturems</Data><NamedCell
      ss:Name="Print_Area"/></Cell>
    <Cell><Data ss:Type="Number">11733989</Data><NamedCell ss:Name="Print_Area"/></Cell>
   </Row>
   <Row>
    <Cell><Data ss:Type="String">YAL021C</Data><NamedCell ss:Name="Print_Area"/></Cell>
    <Cell><Data ss:Type="String">YPR072W</Data><NamedCell ss:Name="Print_Area"/></Cell>
    <Cell><Data ss:Type="String">affinitycapturewestern</Data><NamedCell
      ss:Name="Print_Area"/></Cell>
    <Cell><Data ss:Type="Number">10490603</Data><NamedCell ss:Name="Print_Area"/></Cell>
   </Row>
   <Row>
    <Cell><Data ss:Type="String">YAL021C</Data><NamedCell ss:Name="Print_Area"/></Cell>
    <Cell><Data ss:Type="String">YPR072W</Data><NamedCell ss:Name="Print_Area"/></Cell>
    <Cell><Data ss:Type="String">affinitycapturewestern</Data><NamedCell
      ss:Name="Print_Area"/></Cell>
    <Cell><Data ss:Type="Number">9463387</Data><NamedCell ss:Name="Print_Area"/></Cell>
   </Row>
   <Row>
    <Cell><Data ss:Type="String">YAL021C</Data><NamedCell ss:Name="Print_Area"/></Cell>
    <Cell><Data ss:Type="String">YPR072W</Data><NamedCell ss:Name="Print_Area"/></Cell>
    <Cell><Data ss:Type="String">copurification</Data><NamedCell
      ss:Name="Print_Area"/></Cell>
    <Cell><Data ss:Type="Number">11733989</Data><NamedCell ss:Name="Print_Area"/></Cell>
   </Row>
   <Row>
    <Cell><Data ss:Type="String">YAL023C</Data><NamedCell ss:Name="Print_Area"/></Cell>
    <Cell><Data ss:Type="String">YDL095W</Data><NamedCell ss:Name="Print_Area"/></Cell>
    <Cell><Data ss:Type="String">affinitycapturewestern</Data><NamedCell
      ss:Name="Print_Area"/></Cell>
    <Cell><Data ss:Type="Number">12551906</Data><NamedCell ss:Name="Print_Area"/></Cell>
   </Row>
   <Row>
    <Cell><Data ss:Type="String">YAL023C</Data><NamedCell ss:Name="Print_Area"/></Cell>
    <Cell><Data ss:Type="String">YDL095W</Data><NamedCell ss:Name="Print_Area"/></Cell>
    <Cell><Data ss:Type="String">affinitycapturewestern</Data><NamedCell
      ss:Name="Print_Area"/></Cell>
    <Cell><Data ss:Type="Number">10764776</Data><NamedCell ss:Name="Print_Area"/></Cell>
   </Row>
   <Row>
    <Cell><Data ss:Type="String">YAL024C</Data><NamedCell ss:Name="Print_Area"/></Cell>
    <Cell><Data ss:Type="String">YBR160W</Data><NamedCell ss:Name="Print_Area"/></Cell>
    <Cell><Data ss:Type="String">reconstitutedcomplex</Data><NamedCell
      ss:Name="Print_Area"/></Cell>
    <Cell><Data ss:Type="Number">14574415</Data><NamedCell ss:Name="Print_Area"/></Cell>
   </Row>
   <Row>
    <Cell><Data ss:Type="String">YAL024C</Data><NamedCell ss:Name="Print_Area"/></Cell>
    <Cell><Data ss:Type="String">YBR160W</Data><NamedCell ss:Name="Print_Area"/></Cell>
    <Cell><Data ss:Type="String">biochemicalactivity</Data><NamedCell
      ss:Name="Print_Area"/></Cell>
    <Cell><Data ss:Type="Number">14574415</Data><NamedCell ss:Name="Print_Area"/></Cell>
   </Row>
   <Row>
    <Cell><Data ss:Type="String">YAL024C</Data><NamedCell ss:Name="Print_Area"/></Cell>
    <Cell><Data ss:Type="String">YHR158C</Data><NamedCell ss:Name="Print_Area"/></Cell>
    <Cell><Data ss:Type="String">affinitycapturewestern</Data><NamedCell
      ss:Name="Print_Area"/></Cell>
    <Cell><Data ss:Type="Number">12498684</Data><NamedCell ss:Name="Print_Area"/></Cell>
   </Row>
   <Row>
    <Cell><Data ss:Type="String">YAL024C</Data><NamedCell ss:Name="Print_Area"/></Cell>
    <Cell><Data ss:Type="String">YHR158C</Data><NamedCell ss:Name="Print_Area"/></Cell>
    <Cell><Data ss:Type="String">affinitycapturems</Data><NamedCell
      ss:Name="Print_Area"/></Cell>
    <Cell><Data ss:Type="Number">16429126</Data><NamedCell ss:Name="Print_Area"/></Cell>
   </Row>
   <Row>
    <Cell><Data ss:Type="String">YAL024C</Data><NamedCell ss:Name="Print_Area"/></Cell>
    <Cell><Data ss:Type="String">YHR158C</Data><NamedCell ss:Name="Print_Area"/></Cell>
    <Cell><Data ss:Type="String">affinitycapturewestern</Data><NamedCell
      ss:Name="Print_Area"/></Cell>
    <Cell><Data ss:Type="Number">12234925</Data><NamedCell ss:Name="Print_Area"/></Cell>
   </Row>
   <Row>
    <Cell><Data ss:Type="String">YAL024C</Data><NamedCell ss:Name="Print_Area"/></Cell>
    <Cell><Data ss:Type="String">YNL098C</Data><NamedCell ss:Name="Print_Area"/></Cell>
    <Cell><Data ss:Type="String">twohybrid</Data><NamedCell ss:Name="Print_Area"/></Cell>
    <Cell><Data ss:Type="Number">12782684</Data><NamedCell ss:Name="Print_Area"/></Cell>
   </Row>
   <Row>
    <Cell><Data ss:Type="String">YAL024C</Data><NamedCell ss:Name="Print_Area"/></Cell>
    <Cell><Data ss:Type="String">YNL098C</Data><NamedCell ss:Name="Print_Area"/></Cell>
    <Cell><Data ss:Type="String">affinitycapturewestern</Data><NamedCell
      ss:Name="Print_Area"/></Cell>
    <Cell><Data ss:Type="Number">12782684</Data><NamedCell ss:Name="Print_Area"/></Cell>
   </Row>
   <Row>
    <Cell><Data ss:Type="String">YAL024C</Data><NamedCell ss:Name="Print_Area"/></Cell>
    <Cell><Data ss:Type="String">YNL098C</Data><NamedCell ss:Name="Print_Area"/></Cell>
    <Cell><Data ss:Type="String">reconstitutedcomplex</Data><NamedCell
      ss:Name="Print_Area"/></Cell>
    <Cell><Data ss:Type="Number">12782684</Data><NamedCell ss:Name="Print_Area"/></Cell>
   </Row>
   <Row>
    <Cell><Data ss:Type="String">YAL024C</Data><NamedCell ss:Name="Print_Area"/></Cell>
    <Cell><Data ss:Type="String">YPR119W</Data><NamedCell ss:Name="Print_Area"/></Cell>
    <Cell><Data ss:Type="String">affinitycapturems</Data><NamedCell
      ss:Name="Print_Area"/></Cell>
    <Cell><Data ss:Type="Number">15200949</Data><NamedCell ss:Name="Print_Area"/></Cell>
   </Row>
   <Row>
    <Cell><Data ss:Type="String">YAL024C</Data><NamedCell ss:Name="Print_Area"/></Cell>
    <Cell><Data ss:Type="String">YPR119W</Data><NamedCell ss:Name="Print_Area"/></Cell>
    <Cell><Data ss:Type="String">biochemicalactivity</Data><NamedCell
      ss:Name="Print_Area"/></Cell>
    <Cell><Data ss:Type="Number">14574415</Data><NamedCell ss:Name="Print_Area"/></Cell>
   </Row>
   <Row>
    <Cell><Data ss:Type="String">YAL025C</Data><NamedCell ss:Name="Print_Area"/></Cell>
    <Cell><Data ss:Type="String">YGR103W</Data><NamedCell ss:Name="Print_Area"/></Cell>
    <Cell><Data ss:Type="String">affinitycapturems</Data><NamedCell
      ss:Name="Print_Area"/></Cell>
    <Cell><Data ss:Type="Number">11583614</Data><NamedCell ss:Name="Print_Area"/></Cell>
   </Row>
   <Row>
    <Cell><Data ss:Type="String">YAL025C</Data><NamedCell ss:Name="Print_Area"/></Cell>
    <Cell><Data ss:Type="String">YGR103W</Data><NamedCell ss:Name="Print_Area"/></Cell>
    <Cell><Data ss:Type="String">unknown</Data><NamedCell ss:Name="Print_Area"/></Cell>
    <Cell><Data ss:Type="Number">11583614</Data><NamedCell ss:Name="Print_Area"/></Cell>
   </Row>
   <Row>
    <Cell><Data ss:Type="String">YAL025C</Data><NamedCell ss:Name="Print_Area"/></Cell>
    <Cell><Data ss:Type="String">YHR066W</Data><NamedCell ss:Name="Print_Area"/></Cell>
    <Cell><Data ss:Type="String">unknown</Data><NamedCell ss:Name="Print_Area"/></Cell>
    <Cell><Data ss:Type="Number">11864607</Data><NamedCell ss:Name="Print_Area"/></Cell>
   </Row>
   <Row>
    <Cell><Data ss:Type="String">YAL025C</Data><NamedCell ss:Name="Print_Area"/></Cell>
    <Cell><Data ss:Type="String">YHR066W</Data><NamedCell ss:Name="Print_Area"/></Cell>
    <Cell><Data ss:Type="String">affinitycapturems</Data><NamedCell
      ss:Name="Print_Area"/></Cell>
    <Cell><Data ss:Type="Number">11864607</Data><NamedCell ss:Name="Print_Area"/></Cell>
   </Row>
   <Row>
    <Cell><Data ss:Type="String">YAL026C</Data><NamedCell ss:Name="Print_Area"/></Cell>
    <Cell><Data ss:Type="String">YDL192W</Data><NamedCell ss:Name="Print_Area"/></Cell>
    <Cell><Data ss:Type="String">reconstitutedcomplex</Data><NamedCell
      ss:Name="Print_Area"/></Cell>
    <Cell><Data ss:Type="Number">10601336</Data><NamedCell ss:Name="Print_Area"/></Cell>
   </Row>
   <Row>
    <Cell><Data ss:Type="String">YAL026C</Data><NamedCell ss:Name="Print_Area"/></Cell>
    <Cell><Data ss:Type="String">YDL192W</Data><NamedCell ss:Name="Print_Area"/></Cell>
    <Cell><Data ss:Type="String">colocalization</Data><NamedCell
      ss:Name="Print_Area"/></Cell>
    <Cell><Data ss:Type="Number">10601336</Data><NamedCell ss:Name="Print_Area"/></Cell>
   </Row>
   <Row>
    <Cell><Data ss:Type="String">YAL026C</Data><NamedCell ss:Name="Print_Area"/></Cell>
    <Cell><Data ss:Type="String">YEL022W</Data><NamedCell ss:Name="Print_Area"/></Cell>
    <Cell><Data ss:Type="String">twohybrid</Data><NamedCell ss:Name="Print_Area"/></Cell>
    <Cell><Data ss:Type="Number">14734650</Data><NamedCell ss:Name="Print_Area"/></Cell>
   </Row>
   <Row>
    <Cell><Data ss:Type="String">YAL026C</Data><NamedCell ss:Name="Print_Area"/></Cell>
    <Cell><Data ss:Type="String">YEL022W</Data><NamedCell ss:Name="Print_Area"/></Cell>
    <Cell><Data ss:Type="String">affinitycapturewestern</Data><NamedCell
      ss:Name="Print_Area"/></Cell>
    <Cell><Data ss:Type="Number">14734650</Data><NamedCell ss:Name="Print_Area"/></Cell>
   </Row>
   <Row>
    <Cell><Data ss:Type="String">YAL028W</Data><NamedCell ss:Name="Print_Area"/></Cell>
    <Cell><Data ss:Type="String">YBR160W</Data><NamedCell ss:Name="Print_Area"/></Cell>
    <Cell><Data ss:Type="String">biochemicalactivity</Data><NamedCell
      ss:Name="Print_Area"/></Cell>
    <Cell><Data ss:Type="Number">14574415</Data><NamedCell ss:Name="Print_Area"/></Cell>
   </Row>
   <Row>
    <Cell><Data ss:Type="String">YAL028W</Data><NamedCell ss:Name="Print_Area"/></Cell>
    <Cell><Data ss:Type="String">YBR160W</Data><NamedCell ss:Name="Print_Area"/></Cell>
    <Cell><Data ss:Type="String">reconstitutedcomplex</Data><NamedCell
      ss:Name="Print_Area"/></Cell>
    <Cell><Data ss:Type="Number">14574415</Data><NamedCell ss:Name="Print_Area"/></Cell>
   </Row>
   <Row>
    <Cell><Data ss:Type="String">YAL029C</Data><NamedCell ss:Name="Print_Area"/></Cell>
    <Cell><Data ss:Type="String">YBR109C</Data><NamedCell ss:Name="Print_Area"/></Cell>
    <Cell><Data ss:Type="String">reconstitutedcomplex</Data><NamedCell
      ss:Name="Print_Area"/></Cell>
    <Cell><Data ss:Type="Number">11474067</Data><NamedCell ss:Name="Print_Area"/></Cell>
   </Row>
   <Row>
    <Cell><Data ss:Type="String">YAL029C</Data><NamedCell ss:Name="Print_Area"/></Cell>
    <Cell><Data ss:Type="String">YBR109C</Data><NamedCell ss:Name="Print_Area"/></Cell>
    <Cell><Data ss:Type="String">affinitycapturems</Data><NamedCell
      ss:Name="Print_Area"/></Cell>
    <Cell><Data ss:Type="Number">11805837</Data><NamedCell ss:Name="Print_Area"/></Cell>
   </Row>
   <Row>
    <Cell><Data ss:Type="String">YAL029C</Data><NamedCell ss:Name="Print_Area"/></Cell>
    <Cell><Data ss:Type="String">YBR130C</Data><NamedCell ss:Name="Print_Area"/></Cell>
    <Cell><Data ss:Type="String">affinitycapturewestern</Data><NamedCell
      ss:Name="Print_Area"/></Cell>
    <Cell><Data ss:Type="Number">15328357</Data><NamedCell ss:Name="Print_Area"/></Cell>
   </Row>
   <Row>
    <Cell><Data ss:Type="String">YAL029C</Data><NamedCell ss:Name="Print_Area"/></Cell>
    <Cell><Data ss:Type="String">YBR130C</Data><NamedCell ss:Name="Print_Area"/></Cell>
    <Cell><Data ss:Type="String">copurification</Data><NamedCell
      ss:Name="Print_Area"/></Cell>
    <Cell><Data ss:Type="Number">11032818</Data><NamedCell ss:Name="Print_Area"/></Cell>
   </Row>
   <Row>
    <Cell><Data ss:Type="String">YAL029C</Data><NamedCell ss:Name="Print_Area"/></Cell>
    <Cell><Data ss:Type="String">YBR130C</Data><NamedCell ss:Name="Print_Area"/></Cell>
    <Cell><Data ss:Type="String">affinitycapturems</Data><NamedCell
      ss:Name="Print_Area"/></Cell>
    <Cell><Data ss:Type="Number">16429126</Data><NamedCell ss:Name="Print_Area"/></Cell>
   </Row>
   <Row>
    <Cell><Data ss:Type="String">YAL029C</Data><NamedCell ss:Name="Print_Area"/></Cell>
    <Cell><Data ss:Type="String">YBR130C</Data><NamedCell ss:Name="Print_Area"/></Cell>
    <Cell><Data ss:Type="String">affinitycapturems</Data><NamedCell
      ss:Name="Print_Area"/></Cell>
    <Cell><Data ss:Type="Number">11805826</Data><NamedCell ss:Name="Print_Area"/></Cell>
   </Row>
   <Row>
    <Cell><Data ss:Type="String">YAL029C</Data><NamedCell ss:Name="Print_Area"/></Cell>
    <Cell><Data ss:Type="String">YBR130C</Data><NamedCell ss:Name="Print_Area"/></Cell>
    <Cell><Data ss:Type="String">affinitycapturewestern</Data><NamedCell
      ss:Name="Print_Area"/></Cell>
    <Cell><Data ss:Type="Number">10792032</Data><NamedCell ss:Name="Print_Area"/></Cell>
   </Row>
   <Row>
    <Cell><Data ss:Type="String">YAL029C</Data><NamedCell ss:Name="Print_Area"/></Cell>
    <Cell><Data ss:Type="String">YBR130C</Data><NamedCell ss:Name="Print_Area"/></Cell>
    <Cell><Data ss:Type="String">twohybrid</Data><NamedCell ss:Name="Print_Area"/></Cell>
    <Cell><Data ss:Type="Number">11032818</Data><NamedCell ss:Name="Print_Area"/></Cell>
   </Row>
   <Row>
    <Cell><Data ss:Type="String">YAL029C</Data><NamedCell ss:Name="Print_Area"/></Cell>
    <Cell><Data ss:Type="String">YBR130C</Data><NamedCell ss:Name="Print_Area"/></Cell>
    <Cell><Data ss:Type="String">affinitycapturewestern</Data><NamedCell
      ss:Name="Print_Area"/></Cell>
    <Cell><Data ss:Type="Number">11032818</Data><NamedCell ss:Name="Print_Area"/></Cell>
   </Row>
   <Row>
    <Cell><Data ss:Type="String">YAL029C</Data><NamedCell ss:Name="Print_Area"/></Cell>
    <Cell><Data ss:Type="String">YBR130C</Data><NamedCell ss:Name="Print_Area"/></Cell>
    <Cell><Data ss:Type="String">affinitycapturems</Data><NamedCell
      ss:Name="Print_Area"/></Cell>
    <Cell><Data ss:Type="Number">16554755</Data><NamedCell ss:Name="Print_Area"/></Cell>
   </Row>
   <Row>
    <Cell><Data ss:Type="String">YAL029C</Data><NamedCell ss:Name="Print_Area"/></Cell>
    <Cell><Data ss:Type="String">YBR130C</Data><NamedCell ss:Name="Print_Area"/></Cell>
    <Cell><Data ss:Type="String">reconstitutedcomplex</Data><NamedCell
      ss:Name="Print_Area"/></Cell>
    <Cell><Data ss:Type="Number">11032818</Data><NamedCell ss:Name="Print_Area"/></Cell>
   </Row>
   <Row>
    <Cell><Data ss:Type="String">YAL029C</Data><NamedCell ss:Name="Print_Area"/></Cell>
    <Cell><Data ss:Type="String">YBR130C</Data><NamedCell ss:Name="Print_Area"/></Cell>
    <Cell><Data ss:Type="String">affinitycapturems</Data><NamedCell
      ss:Name="Print_Area"/></Cell>
    <Cell><Data ss:Type="Number">11805837</Data><NamedCell ss:Name="Print_Area"/></Cell>
   </Row>
   <Row>
    <Cell><Data ss:Type="String">YAL029C</Data><NamedCell ss:Name="Print_Area"/></Cell>
    <Cell><Data ss:Type="String">YFL039C</Data><NamedCell ss:Name="Print_Area"/></Cell>
    <Cell><Data ss:Type="String">affinitycapturems</Data><NamedCell
      ss:Name="Print_Area"/></Cell>
    <Cell><Data ss:Type="Number">11805826</Data><NamedCell ss:Name="Print_Area"/></Cell>
   </Row>
   <Row>
    <Cell><Data ss:Type="String">YAL029C</Data><NamedCell ss:Name="Print_Area"/></Cell>
    <Cell><Data ss:Type="String">YFL039C</Data><NamedCell ss:Name="Print_Area"/></Cell>
    <Cell><Data ss:Type="String">unknown</Data><NamedCell ss:Name="Print_Area"/></Cell>
    <Cell><Data ss:Type="Number">0</Data><NamedCell ss:Name="Print_Area"/></Cell>
   </Row>
   <Row>
    <Cell><Data ss:Type="String">YAL029C</Data><NamedCell ss:Name="Print_Area"/></Cell>
    <Cell><Data ss:Type="String">YFL039C</Data><NamedCell ss:Name="Print_Area"/></Cell>
    <Cell><Data ss:Type="String">affinitycapturems</Data><NamedCell
      ss:Name="Print_Area"/></Cell>
    <Cell><Data ss:Type="Number">16429126</Data><NamedCell ss:Name="Print_Area"/></Cell>
   </Row>
   <Row>
    <Cell><Data ss:Type="String">YAL029C</Data><NamedCell ss:Name="Print_Area"/></Cell>
    <Cell><Data ss:Type="String">YKL130C</Data><NamedCell ss:Name="Print_Area"/></Cell>
    <Cell><Data ss:Type="String">affinitycapturems</Data><NamedCell
      ss:Name="Print_Area"/></Cell>
    <Cell><Data ss:Type="Number">11805826</Data><NamedCell ss:Name="Print_Area"/></Cell>
   </Row>
   <Row>
    <Cell><Data ss:Type="String">YAL029C</Data><NamedCell ss:Name="Print_Area"/></Cell>
    <Cell><Data ss:Type="String">YKL130C</Data><NamedCell ss:Name="Print_Area"/></Cell>
    <Cell><Data ss:Type="String">twohybrid</Data><NamedCell ss:Name="Print_Area"/></Cell>
    <Cell><Data ss:Type="Number">11032818</Data><NamedCell ss:Name="Print_Area"/></Cell>
   </Row>
   <Row>
    <Cell><Data ss:Type="String">YAL029C</Data><NamedCell ss:Name="Print_Area"/></Cell>
    <Cell><Data ss:Type="String">YKL130C</Data><NamedCell ss:Name="Print_Area"/></Cell>
    <Cell><Data ss:Type="String">affinitycapturems</Data><NamedCell
      ss:Name="Print_Area"/></Cell>
    <Cell><Data ss:Type="Number">16429126</Data><NamedCell ss:Name="Print_Area"/></Cell>
   </Row>
   <Row>
    <Cell><Data ss:Type="String">YAL029C</Data><NamedCell ss:Name="Print_Area"/></Cell>
    <Cell><Data ss:Type="String">YKL130C</Data><NamedCell ss:Name="Print_Area"/></Cell>
    <Cell><Data ss:Type="String">affinitycapturewestern</Data><NamedCell
      ss:Name="Print_Area"/></Cell>
    <Cell><Data ss:Type="Number">15328357</Data><NamedCell ss:Name="Print_Area"/></Cell>
   </Row>
   <Row>
    <Cell><Data ss:Type="String">YAL029C</Data><NamedCell ss:Name="Print_Area"/></Cell>
    <Cell><Data ss:Type="String">YOR035C</Data><NamedCell ss:Name="Print_Area"/></Cell>
    <Cell><Data ss:Type="String">affinitycapturewestern</Data><NamedCell
      ss:Name="Print_Area"/></Cell>
    <Cell><Data ss:Type="Number">12725728</Data><NamedCell ss:Name="Print_Area"/></Cell>
   </Row>
   <Row>
    <Cell><Data ss:Type="String">YAL029C</Data><NamedCell ss:Name="Print_Area"/></Cell>
    <Cell><Data ss:Type="String">YOR035C</Data><NamedCell ss:Name="Print_Area"/></Cell>
    <Cell><Data ss:Type="String">twohybrid</Data><NamedCell ss:Name="Print_Area"/></Cell>
    <Cell><Data ss:Type="Number">12808026</Data><NamedCell ss:Name="Print_Area"/></Cell>
   </Row>
   <Row>
    <Cell><Data ss:Type="String">YAL030W</Data><NamedCell ss:Name="Print_Area"/></Cell>
    <Cell><Data ss:Type="String">YAL014C</Data><NamedCell ss:Name="Print_Area"/></Cell>
    <Cell><Data ss:Type="String">unknown</Data><NamedCell ss:Name="Print_Area"/></Cell>
    <Cell><Data ss:Type="Number">12453154</Data><NamedCell ss:Name="Print_Area"/></Cell>
   </Row>
   <Row>
    <Cell><Data ss:Type="String">YAL030W</Data><NamedCell ss:Name="Print_Area"/></Cell>
    <Cell><Data ss:Type="String">YAL014C</Data><NamedCell ss:Name="Print_Area"/></Cell>
    <Cell><Data ss:Type="String">affinitycapturewestern</Data><NamedCell
      ss:Name="Print_Area"/></Cell>
    <Cell><Data ss:Type="Number">12453154</Data><NamedCell ss:Name="Print_Area"/></Cell>
   </Row>
   <Row>
    <Cell><Data ss:Type="String">YAL030W</Data><NamedCell ss:Name="Print_Area"/></Cell>
    <Cell><Data ss:Type="String">YBL050W</Data><NamedCell ss:Name="Print_Area"/></Cell>
    <Cell><Data ss:Type="String">unknown</Data><NamedCell ss:Name="Print_Area"/></Cell>
    <Cell><Data ss:Type="Number">9195974</Data><NamedCell ss:Name="Print_Area"/></Cell>
   </Row>
   <Row>
    <Cell><Data ss:Type="String">YAL030W</Data><NamedCell ss:Name="Print_Area"/></Cell>
    <Cell><Data ss:Type="String">YBL050W</Data><NamedCell ss:Name="Print_Area"/></Cell>
    <Cell><Data ss:Type="String">reconstitutedcomplex</Data><NamedCell
      ss:Name="Print_Area"/></Cell>
    <Cell><Data ss:Type="Number">9195974</Data><NamedCell ss:Name="Print_Area"/></Cell>
   </Row>
   <Row>
    <Cell><Data ss:Type="String">YAL030W</Data><NamedCell ss:Name="Print_Area"/></Cell>
    <Cell><Data ss:Type="String">YDR468C</Data><NamedCell ss:Name="Print_Area"/></Cell>
    <Cell><Data ss:Type="String">affinitycapturewestern</Data><NamedCell
      ss:Name="Print_Area"/></Cell>
    <Cell><Data ss:Type="Number">9427746</Data><NamedCell ss:Name="Print_Area"/></Cell>
   </Row>
   <Row>
    <Cell><Data ss:Type="String">YAL030W</Data><NamedCell ss:Name="Print_Area"/></Cell>
    <Cell><Data ss:Type="String">YDR468C</Data><NamedCell ss:Name="Print_Area"/></Cell>
    <Cell><Data ss:Type="String">unknown</Data><NamedCell ss:Name="Print_Area"/></Cell>
    <Cell><Data ss:Type="Number">9427746</Data><NamedCell ss:Name="Print_Area"/></Cell>
   </Row>
   <Row>
    <Cell><Data ss:Type="String">YAL030W</Data><NamedCell ss:Name="Print_Area"/></Cell>
    <Cell><Data ss:Type="String">YER143W</Data><NamedCell ss:Name="Print_Area"/></Cell>
    <Cell><Data ss:Type="String">affinitycapturewestern</Data><NamedCell
      ss:Name="Print_Area"/></Cell>
    <Cell><Data ss:Type="Number">12925750</Data><NamedCell ss:Name="Print_Area"/></Cell>
   </Row>
   <Row>
    <Cell><Data ss:Type="String">YAL030W</Data><NamedCell ss:Name="Print_Area"/></Cell>
    <Cell><Data ss:Type="String">YER143W</Data><NamedCell ss:Name="Print_Area"/></Cell>
    <Cell><Data ss:Type="String">affinitycapturewestern</Data><NamedCell
      ss:Name="Print_Area"/></Cell>
    <Cell><Data ss:Type="Number">10330187</Data><NamedCell ss:Name="Print_Area"/></Cell>
   </Row>
   <Row>
    <Cell><Data ss:Type="String">YAL030W</Data><NamedCell ss:Name="Print_Area"/></Cell>
    <Cell><Data ss:Type="String">YGR009C</Data><NamedCell ss:Name="Print_Area"/></Cell>
    <Cell><Data ss:Type="String">unknown</Data><NamedCell ss:Name="Print_Area"/></Cell>
    <Cell><Data ss:Type="Number">7954793</Data><NamedCell ss:Name="Print_Area"/></Cell>
   </Row>
   <Row>
    <Cell><Data ss:Type="String">YAL030W</Data><NamedCell ss:Name="Print_Area"/></Cell>
    <Cell><Data ss:Type="String">YGR009C</Data><NamedCell ss:Name="Print_Area"/></Cell>
    <Cell><Data ss:Type="String">affinitycapturewestern</Data><NamedCell
      ss:Name="Print_Area"/></Cell>
    <Cell><Data ss:Type="Number">7954793</Data><NamedCell ss:Name="Print_Area"/></Cell>
   </Row>
   <Row>
    <Cell><Data ss:Type="String">YAL030W</Data><NamedCell ss:Name="Print_Area"/></Cell>
    <Cell><Data ss:Type="String">YGR009C</Data><NamedCell ss:Name="Print_Area"/></Cell>
    <Cell><Data ss:Type="String">affinitycapturewestern</Data><NamedCell
      ss:Name="Print_Area"/></Cell>
    <Cell><Data ss:Type="Number">8089101</Data><NamedCell ss:Name="Print_Area"/></Cell>
   </Row>
   <Row>
    <Cell><Data ss:Type="String">YAL030W</Data><NamedCell ss:Name="Print_Area"/></Cell>
    <Cell><Data ss:Type="String">YGR009C</Data><NamedCell ss:Name="Print_Area"/></Cell>
    <Cell><Data ss:Type="String">unknown</Data><NamedCell ss:Name="Print_Area"/></Cell>
    <Cell><Data ss:Type="Number">9195974</Data><NamedCell ss:Name="Print_Area"/></Cell>
   </Row>
   <Row>
    <Cell><Data ss:Type="String">YAL030W</Data><NamedCell ss:Name="Print_Area"/></Cell>
    <Cell><Data ss:Type="String">YGR009C</Data><NamedCell ss:Name="Print_Area"/></Cell>
    <Cell><Data ss:Type="String">reconstitutedcomplex</Data><NamedCell
      ss:Name="Print_Area"/></Cell>
    <Cell><Data ss:Type="Number">9195974</Data><NamedCell ss:Name="Print_Area"/></Cell>
   </Row>
   <Row>
    <Cell><Data ss:Type="String">YAL030W</Data><NamedCell ss:Name="Print_Area"/></Cell>
    <Cell><Data ss:Type="String">YGR009C</Data><NamedCell ss:Name="Print_Area"/></Cell>
    <Cell><Data ss:Type="String">affinitycapturewestern</Data><NamedCell
      ss:Name="Print_Area"/></Cell>
    <Cell><Data ss:Type="Number">10402465</Data><NamedCell ss:Name="Print_Area"/></Cell>
   </Row>
   <Row>
    <Cell><Data ss:Type="String">YAL030W</Data><NamedCell ss:Name="Print_Area"/></Cell>
    <Cell><Data ss:Type="String">YGR009C</Data><NamedCell ss:Name="Print_Area"/></Cell>
    <Cell><Data ss:Type="String">cocrystalstructure</Data><NamedCell
      ss:Name="Print_Area"/></Cell>
    <Cell><Data ss:Type="Number">10048921</Data><NamedCell ss:Name="Print_Area"/></Cell>
   </Row>
   <Row>
    <Cell><Data ss:Type="String">YAL030W</Data><NamedCell ss:Name="Print_Area"/></Cell>
    <Cell><Data ss:Type="String">YMR183C</Data><NamedCell ss:Name="Print_Area"/></Cell>
    <Cell><Data ss:Type="String">affinitycapturewestern</Data><NamedCell
      ss:Name="Print_Area"/></Cell>
    <Cell><Data ss:Type="Number">11038190</Data><NamedCell ss:Name="Print_Area"/></Cell>
   </Row>
   <Row>
    <Cell><Data ss:Type="String">YAL030W</Data><NamedCell ss:Name="Print_Area"/></Cell>
    <Cell><Data ss:Type="String">YMR183C</Data><NamedCell ss:Name="Print_Area"/></Cell>
    <Cell><Data ss:Type="String">affinitycapturewestern</Data><NamedCell
      ss:Name="Print_Area"/></Cell>
    <Cell><Data ss:Type="Number">11038189</Data><NamedCell ss:Name="Print_Area"/></Cell>
   </Row>
   <Row>
    <Cell><Data ss:Type="String">YAL030W</Data><NamedCell ss:Name="Print_Area"/></Cell>
    <Cell><Data ss:Type="String">YNR049C</Data><NamedCell ss:Name="Print_Area"/></Cell>
    <Cell><Data ss:Type="String">affinitycapturewestern</Data><NamedCell
      ss:Name="Print_Area"/></Cell>
    <Cell><Data ss:Type="Number">16087665</Data><NamedCell ss:Name="Print_Area"/></Cell>
   </Row>
   <Row>
    <Cell><Data ss:Type="String">YAL030W</Data><NamedCell ss:Name="Print_Area"/></Cell>
    <Cell><Data ss:Type="String">YNR049C</Data><NamedCell ss:Name="Print_Area"/></Cell>
    <Cell><Data ss:Type="String">affinitycapturewestern</Data><NamedCell
      ss:Name="Print_Area"/></Cell>
    <Cell><Data ss:Type="Number">16030256</Data><NamedCell ss:Name="Print_Area"/></Cell>
   </Row>
   <Row>
    <Cell><Data ss:Type="String">YAL030W</Data><NamedCell ss:Name="Print_Area"/></Cell>
    <Cell><Data ss:Type="String">YPL232W</Data><NamedCell ss:Name="Print_Area"/></Cell>
    <Cell><Data ss:Type="String">affinitycapturewestern</Data><NamedCell
      ss:Name="Print_Area"/></Cell>
    <Cell><Data ss:Type="Number">11038189</Data><NamedCell ss:Name="Print_Area"/></Cell>
   </Row>
   <Row>
    <Cell><Data ss:Type="String">YAL030W</Data><NamedCell ss:Name="Print_Area"/></Cell>
    <Cell><Data ss:Type="String">YPL232W</Data><NamedCell ss:Name="Print_Area"/></Cell>
    <Cell><Data ss:Type="String">cocrystalstructure</Data><NamedCell
      ss:Name="Print_Area"/></Cell>
    <Cell><Data ss:Type="Number">10048921</Data><NamedCell ss:Name="Print_Area"/></Cell>
   </Row>
   <Row>
    <Cell><Data ss:Type="String">YAL030W</Data><NamedCell ss:Name="Print_Area"/></Cell>
    <Cell><Data ss:Type="String">YPL232W</Data><NamedCell ss:Name="Print_Area"/></Cell>
    <Cell><Data ss:Type="String">reconstitutedcomplex</Data><NamedCell
      ss:Name="Print_Area"/></Cell>
    <Cell><Data ss:Type="Number">9195974</Data><NamedCell ss:Name="Print_Area"/></Cell>
   </Row>
   <Row>
    <Cell><Data ss:Type="String">YAL030W</Data><NamedCell ss:Name="Print_Area"/></Cell>
    <Cell><Data ss:Type="String">YPL232W</Data><NamedCell ss:Name="Print_Area"/></Cell>
    <Cell><Data ss:Type="String">unknown</Data><NamedCell ss:Name="Print_Area"/></Cell>
    <Cell><Data ss:Type="Number">9195974</Data><NamedCell ss:Name="Print_Area"/></Cell>
   </Row>
   <Row>
    <Cell><Data ss:Type="String">YAL030W</Data><NamedCell ss:Name="Print_Area"/></Cell>
    <Cell><Data ss:Type="String">YPL232W</Data><NamedCell ss:Name="Print_Area"/></Cell>
    <Cell><Data ss:Type="String">affinitycapturewestern</Data><NamedCell
      ss:Name="Print_Area"/></Cell>
    <Cell><Data ss:Type="Number">10402465</Data><NamedCell ss:Name="Print_Area"/></Cell>
   </Row>
   <Row>
    <Cell><Data ss:Type="String">YAL031C</Data><NamedCell ss:Name="Print_Area"/></Cell>
    <Cell><Data ss:Type="String">YBR160W</Data><NamedCell ss:Name="Print_Area"/></Cell>
    <Cell><Data ss:Type="String">reconstitutedcomplex</Data><NamedCell
      ss:Name="Print_Area"/></Cell>
    <Cell><Data ss:Type="Number">14574415</Data><NamedCell ss:Name="Print_Area"/></Cell>
   </Row>
   <Row>
    <Cell><Data ss:Type="String">YAL031C</Data><NamedCell ss:Name="Print_Area"/></Cell>
    <Cell><Data ss:Type="String">YBR160W</Data><NamedCell ss:Name="Print_Area"/></Cell>
    <Cell><Data ss:Type="String">biochemicalactivity</Data><NamedCell
      ss:Name="Print_Area"/></Cell>
    <Cell><Data ss:Type="Number">14574415</Data><NamedCell ss:Name="Print_Area"/></Cell>
   </Row>
   <Row>
    <Cell><Data ss:Type="String">YAL031C</Data><NamedCell ss:Name="Print_Area"/></Cell>
    <Cell><Data ss:Type="String">YCL027W</Data><NamedCell ss:Name="Print_Area"/></Cell>
    <Cell><Data ss:Type="String">twohybrid</Data><NamedCell ss:Name="Print_Area"/></Cell>
    <Cell><Data ss:Type="Number">11743162</Data><NamedCell ss:Name="Print_Area"/></Cell>
   </Row>
   <Row>
    <Cell><Data ss:Type="String">YAL031C</Data><NamedCell ss:Name="Print_Area"/></Cell>
    <Cell><Data ss:Type="String">YCL027W</Data><NamedCell ss:Name="Print_Area"/></Cell>
    <Cell><Data ss:Type="String">proteinpeptide</Data><NamedCell
      ss:Name="Print_Area"/></Cell>
    <Cell><Data ss:Type="Number">11743162</Data><NamedCell ss:Name="Print_Area"/></Cell>
   </Row>
   <Row>
    <Cell><Data ss:Type="String">YAL032C</Data><NamedCell ss:Name="Print_Area"/></Cell>
    <Cell><Data ss:Type="String">YDL209C</Data><NamedCell ss:Name="Print_Area"/></Cell>
    <Cell><Data ss:Type="String">affinitycapturems</Data><NamedCell
      ss:Name="Print_Area"/></Cell>
    <Cell><Data ss:Type="Number">11884590</Data><NamedCell ss:Name="Print_Area"/></Cell>
   </Row>
   <Row>
    <Cell><Data ss:Type="String">YAL032C</Data><NamedCell ss:Name="Print_Area"/></Cell>
    <Cell><Data ss:Type="String">YDL209C</Data><NamedCell ss:Name="Print_Area"/></Cell>
    <Cell><Data ss:Type="String">affinitycapturems</Data><NamedCell
      ss:Name="Print_Area"/></Cell>
    <Cell><Data ss:Type="Number">14690591</Data><NamedCell ss:Name="Print_Area"/></Cell>
   </Row>
   <Row>
    <Cell><Data ss:Type="String">YAL032C</Data><NamedCell ss:Name="Print_Area"/></Cell>
    <Cell><Data ss:Type="String">YDL209C</Data><NamedCell ss:Name="Print_Area"/></Cell>
    <Cell><Data ss:Type="String">affinitycapturems</Data><NamedCell
      ss:Name="Print_Area"/></Cell>
    <Cell><Data ss:Type="Number">16429126</Data><NamedCell ss:Name="Print_Area"/></Cell>
   </Row>
   <Row>
    <Cell><Data ss:Type="String">YAL032C</Data><NamedCell ss:Name="Print_Area"/></Cell>
    <Cell><Data ss:Type="String">YDL209C</Data><NamedCell ss:Name="Print_Area"/></Cell>
    <Cell><Data ss:Type="String">affinitycapturems</Data><NamedCell
      ss:Name="Print_Area"/></Cell>
    <Cell><Data ss:Type="Number">11805826</Data><NamedCell ss:Name="Print_Area"/></Cell>
   </Row>
   <Row>
    <Cell><Data ss:Type="String">YAL032C</Data><NamedCell ss:Name="Print_Area"/></Cell>
    <Cell><Data ss:Type="String">YDR416W</Data><NamedCell ss:Name="Print_Area"/></Cell>
    <Cell><Data ss:Type="String">affinitycapturems</Data><NamedCell
      ss:Name="Print_Area"/></Cell>
    <Cell><Data ss:Type="Number">16429126</Data><NamedCell ss:Name="Print_Area"/></Cell>
   </Row>
   <Row>
    <Cell><Data ss:Type="String">YAL032C</Data><NamedCell ss:Name="Print_Area"/></Cell>
    <Cell><Data ss:Type="String">YDR416W</Data><NamedCell ss:Name="Print_Area"/></Cell>
    <Cell><Data ss:Type="String">twohybrid</Data><NamedCell ss:Name="Print_Area"/></Cell>
    <Cell><Data ss:Type="Number">12554883</Data><NamedCell ss:Name="Print_Area"/></Cell>
   </Row>
   <Row>
    <Cell><Data ss:Type="String">YAL032C</Data><NamedCell ss:Name="Print_Area"/></Cell>
    <Cell><Data ss:Type="String">YDR416W</Data><NamedCell ss:Name="Print_Area"/></Cell>
    <Cell><Data ss:Type="String">affinitycapturems</Data><NamedCell
      ss:Name="Print_Area"/></Cell>
    <Cell><Data ss:Type="Number">11805826</Data><NamedCell ss:Name="Print_Area"/></Cell>
   </Row>
   <Row>
    <Cell><Data ss:Type="String">YAL032C</Data><NamedCell ss:Name="Print_Area"/></Cell>
    <Cell><Data ss:Type="String">YDR416W</Data><NamedCell ss:Name="Print_Area"/></Cell>
    <Cell><Data ss:Type="String">twohybrid</Data><NamedCell ss:Name="Print_Area"/></Cell>
    <Cell><Data ss:Type="Number">11283351</Data><NamedCell ss:Name="Print_Area"/></Cell>
   </Row>
   <Row>
    <Cell><Data ss:Type="String">YAL032C</Data><NamedCell ss:Name="Print_Area"/></Cell>
    <Cell><Data ss:Type="String">YDR416W</Data><NamedCell ss:Name="Print_Area"/></Cell>
    <Cell><Data ss:Type="String">affinitycapturems</Data><NamedCell
      ss:Name="Print_Area"/></Cell>
    <Cell><Data ss:Type="Number">16554755</Data><NamedCell ss:Name="Print_Area"/></Cell>
   </Row>
   <Row>
    <Cell><Data ss:Type="String">YAL032C</Data><NamedCell ss:Name="Print_Area"/></Cell>
    <Cell><Data ss:Type="String">YLL036C</Data><NamedCell ss:Name="Print_Area"/></Cell>
    <Cell><Data ss:Type="String">affinitycapturems</Data><NamedCell
      ss:Name="Print_Area"/></Cell>
    <Cell><Data ss:Type="Number">16429126</Data><NamedCell ss:Name="Print_Area"/></Cell>
   </Row>
   <Row>
    <Cell><Data ss:Type="String">YAL032C</Data><NamedCell ss:Name="Print_Area"/></Cell>
    <Cell><Data ss:Type="String">YLL036C</Data><NamedCell ss:Name="Print_Area"/></Cell>
    <Cell><Data ss:Type="String">affinitycapturems</Data><NamedCell
      ss:Name="Print_Area"/></Cell>
    <Cell><Data ss:Type="Number">11884590</Data><NamedCell ss:Name="Print_Area"/></Cell>
   </Row>
   <Row>
    <Cell><Data ss:Type="String">YAL032C</Data><NamedCell ss:Name="Print_Area"/></Cell>
    <Cell><Data ss:Type="String">YLL036C</Data><NamedCell ss:Name="Print_Area"/></Cell>
    <Cell><Data ss:Type="String">copurification</Data><NamedCell
      ss:Name="Print_Area"/></Cell>
    <Cell><Data ss:Type="Number">11804584</Data><NamedCell ss:Name="Print_Area"/></Cell>
   </Row>
   <Row>
    <Cell><Data ss:Type="String">YAL032C</Data><NamedCell ss:Name="Print_Area"/></Cell>
    <Cell><Data ss:Type="String">YLL036C</Data><NamedCell ss:Name="Print_Area"/></Cell>
    <Cell><Data ss:Type="String">affinitycapturems</Data><NamedCell
      ss:Name="Print_Area"/></Cell>
    <Cell><Data ss:Type="Number">11805826</Data><NamedCell ss:Name="Print_Area"/></Cell>
   </Row>
   <Row>
    <Cell><Data ss:Type="String">YAL032C</Data><NamedCell ss:Name="Print_Area"/></Cell>
    <Cell><Data ss:Type="String">YLR424W</Data><NamedCell ss:Name="Print_Area"/></Cell>
    <Cell><Data ss:Type="String">twohybrid</Data><NamedCell ss:Name="Print_Area"/></Cell>
    <Cell><Data ss:Type="Number">12554883</Data><NamedCell ss:Name="Print_Area"/></Cell>
   </Row>
   <Row>
    <Cell><Data ss:Type="String">YAL032C</Data><NamedCell ss:Name="Print_Area"/></Cell>
    <Cell><Data ss:Type="String">YLR424W</Data><NamedCell ss:Name="Print_Area"/></Cell>
    <Cell><Data ss:Type="String">affinitycapturems</Data><NamedCell
      ss:Name="Print_Area"/></Cell>
    <Cell><Data ss:Type="Number">14690591</Data><NamedCell ss:Name="Print_Area"/></Cell>
   </Row>
   <Row>
    <Cell><Data ss:Type="String">YAL032C</Data><NamedCell ss:Name="Print_Area"/></Cell>
    <Cell><Data ss:Type="String">YMR213W</Data><NamedCell ss:Name="Print_Area"/></Cell>
    <Cell><Data ss:Type="String">affinitycapturems</Data><NamedCell
      ss:Name="Print_Area"/></Cell>
    <Cell><Data ss:Type="Number">16429126</Data><NamedCell ss:Name="Print_Area"/></Cell>
   </Row>
   <Row>
    <Cell><Data ss:Type="String">YAL032C</Data><NamedCell ss:Name="Print_Area"/></Cell>
    <Cell><Data ss:Type="String">YMR213W</Data><NamedCell ss:Name="Print_Area"/></Cell>
    <Cell><Data ss:Type="String">affinitycapturems</Data><NamedCell
      ss:Name="Print_Area"/></Cell>
    <Cell><Data ss:Type="Number">11884590</Data><NamedCell ss:Name="Print_Area"/></Cell>
   </Row>
   <Row>
    <Cell><Data ss:Type="String">YAL032C</Data><NamedCell ss:Name="Print_Area"/></Cell>
    <Cell><Data ss:Type="String">YMR213W</Data><NamedCell ss:Name="Print_Area"/></Cell>
    <Cell><Data ss:Type="String">affinitycapturems</Data><NamedCell
      ss:Name="Print_Area"/></Cell>
    <Cell><Data ss:Type="Number">11805826</Data><NamedCell ss:Name="Print_Area"/></Cell>
   </Row>
   <Row>
    <Cell><Data ss:Type="String">YAL032C</Data><NamedCell ss:Name="Print_Area"/></Cell>
    <Cell><Data ss:Type="String">YPL151C</Data><NamedCell ss:Name="Print_Area"/></Cell>
    <Cell><Data ss:Type="String">affinitycapturems</Data><NamedCell
      ss:Name="Print_Area"/></Cell>
    <Cell><Data ss:Type="Number">11884590</Data><NamedCell ss:Name="Print_Area"/></Cell>
   </Row>
   <Row>
    <Cell><Data ss:Type="String">YAL032C</Data><NamedCell ss:Name="Print_Area"/></Cell>
    <Cell><Data ss:Type="String">YPL151C</Data><NamedCell ss:Name="Print_Area"/></Cell>
    <Cell><Data ss:Type="String">reconstitutedcomplex</Data><NamedCell
      ss:Name="Print_Area"/></Cell>
    <Cell><Data ss:Type="Number">12554883</Data><NamedCell ss:Name="Print_Area"/></Cell>
   </Row>
   <Row>
    <Cell><Data ss:Type="String">YAL032C</Data><NamedCell ss:Name="Print_Area"/></Cell>
    <Cell><Data ss:Type="String">YPL151C</Data><NamedCell ss:Name="Print_Area"/></Cell>
    <Cell><Data ss:Type="String">affinitycapturems</Data><NamedCell
      ss:Name="Print_Area"/></Cell>
    <Cell><Data ss:Type="Number">16429126</Data><NamedCell ss:Name="Print_Area"/></Cell>
   </Row>
   <Row>
    <Cell><Data ss:Type="String">YAL032C</Data><NamedCell ss:Name="Print_Area"/></Cell>
    <Cell><Data ss:Type="String">YPL151C</Data><NamedCell ss:Name="Print_Area"/></Cell>
    <Cell><Data ss:Type="String">twohybrid</Data><NamedCell ss:Name="Print_Area"/></Cell>
    <Cell><Data ss:Type="Number">12554883</Data><NamedCell ss:Name="Print_Area"/></Cell>
   </Row>
   <Row>
    <Cell><Data ss:Type="String">YAL032C</Data><NamedCell ss:Name="Print_Area"/></Cell>
    <Cell><Data ss:Type="String">YPL151C</Data><NamedCell ss:Name="Print_Area"/></Cell>
    <Cell><Data ss:Type="String">affinitycapturewestern</Data><NamedCell
      ss:Name="Print_Area"/></Cell>
    <Cell><Data ss:Type="Number">12554883</Data><NamedCell ss:Name="Print_Area"/></Cell>
   </Row>
   <Row>
    <Cell><Data ss:Type="String">YAL032C</Data><NamedCell ss:Name="Print_Area"/></Cell>
    <Cell><Data ss:Type="String">YPL151C</Data><NamedCell ss:Name="Print_Area"/></Cell>
    <Cell><Data ss:Type="String">affinitycapturems</Data><NamedCell
      ss:Name="Print_Area"/></Cell>
    <Cell><Data ss:Type="Number">11805826</Data><NamedCell ss:Name="Print_Area"/></Cell>
   </Row>
   <Row>
    <Cell><Data ss:Type="String">YAL032C</Data><NamedCell ss:Name="Print_Area"/></Cell>
    <Cell><Data ss:Type="String">YPL151C</Data><NamedCell ss:Name="Print_Area"/></Cell>
    <Cell><Data ss:Type="String">affinitycapturems</Data><NamedCell
      ss:Name="Print_Area"/></Cell>
    <Cell><Data ss:Type="Number">16554755</Data><NamedCell ss:Name="Print_Area"/></Cell>
   </Row>
   <Row>
    <Cell><Data ss:Type="String">YAL032C</Data><NamedCell ss:Name="Print_Area"/></Cell>
    <Cell><Data ss:Type="String">YPL151C</Data><NamedCell ss:Name="Print_Area"/></Cell>
    <Cell><Data ss:Type="String">twohybrid</Data><NamedCell ss:Name="Print_Area"/></Cell>
    <Cell><Data ss:Type="Number">10688190</Data><NamedCell ss:Name="Print_Area"/></Cell>
   </Row>
   <Row>
    <Cell><Data ss:Type="String">YAL032C</Data><NamedCell ss:Name="Print_Area"/></Cell>
    <Cell><Data ss:Type="String">YPL151C</Data><NamedCell ss:Name="Print_Area"/></Cell>
    <Cell><Data ss:Type="String">twohybrid</Data><NamedCell ss:Name="Print_Area"/></Cell>
    <Cell><Data ss:Type="Number">11283351</Data><NamedCell ss:Name="Print_Area"/></Cell>
   </Row>
   <Row>
    <Cell><Data ss:Type="String">YAL033W</Data><NamedCell ss:Name="Print_Area"/></Cell>
    <Cell><Data ss:Type="String">YBR257W</Data><NamedCell ss:Name="Print_Area"/></Cell>
    <Cell><Data ss:Type="String">affinitycapturems</Data><NamedCell
      ss:Name="Print_Area"/></Cell>
    <Cell><Data ss:Type="Number">15637077</Data><NamedCell ss:Name="Print_Area"/></Cell>
   </Row>
   <Row>
    <Cell><Data ss:Type="String">YAL033W</Data><NamedCell ss:Name="Print_Area"/></Cell>
    <Cell><Data ss:Type="String">YBR257W</Data><NamedCell ss:Name="Print_Area"/></Cell>
    <Cell><Data ss:Type="String">twohybrid</Data><NamedCell ss:Name="Print_Area"/></Cell>
    <Cell><Data ss:Type="Number">11880623</Data><NamedCell ss:Name="Print_Area"/></Cell>
   </Row>
   <Row>
    <Cell><Data ss:Type="String">YAL033W</Data><NamedCell ss:Name="Print_Area"/></Cell>
    <Cell><Data ss:Type="String">YGR030C</Data><NamedCell ss:Name="Print_Area"/></Cell>
    <Cell><Data ss:Type="String">twohybrid</Data><NamedCell ss:Name="Print_Area"/></Cell>
    <Cell><Data ss:Type="Number">11880623</Data><NamedCell ss:Name="Print_Area"/></Cell>
   </Row>
   <Row>
    <Cell><Data ss:Type="String">YAL033W</Data><NamedCell ss:Name="Print_Area"/></Cell>
    <Cell><Data ss:Type="String">YGR030C</Data><NamedCell ss:Name="Print_Area"/></Cell>
    <Cell><Data ss:Type="String">affinitycapturems</Data><NamedCell
      ss:Name="Print_Area"/></Cell>
    <Cell><Data ss:Type="Number">16429126</Data><NamedCell ss:Name="Print_Area"/></Cell>
   </Row>
   <Row>
    <Cell><Data ss:Type="String">YAL033W</Data><NamedCell ss:Name="Print_Area"/></Cell>
    <Cell><Data ss:Type="String">YHR062C</Data><NamedCell ss:Name="Print_Area"/></Cell>
    <Cell><Data ss:Type="String">twohybrid</Data><NamedCell ss:Name="Print_Area"/></Cell>
    <Cell><Data ss:Type="Number">11880623</Data><NamedCell ss:Name="Print_Area"/></Cell>
   </Row>
   <Row>
    <Cell><Data ss:Type="String">YAL033W</Data><NamedCell ss:Name="Print_Area"/></Cell>
    <Cell><Data ss:Type="String">YHR062C</Data><NamedCell ss:Name="Print_Area"/></Cell>
    <Cell><Data ss:Type="String">affinitycapturems</Data><NamedCell
      ss:Name="Print_Area"/></Cell>
    <Cell><Data ss:Type="Number">16554755</Data><NamedCell ss:Name="Print_Area"/></Cell>
   </Row>
   <Row>
    <Cell><Data ss:Type="String">YAL033W</Data><NamedCell ss:Name="Print_Area"/></Cell>
    <Cell><Data ss:Type="String">YHR062C</Data><NamedCell ss:Name="Print_Area"/></Cell>
    <Cell><Data ss:Type="String">insilico</Data><NamedCell ss:Name="Print_Area"/></Cell>
    <Cell><Data ss:Type="Number">12000970</Data><NamedCell ss:Name="Print_Area"/></Cell>
   </Row>
   <Row>
    <Cell><Data ss:Type="String">YAL034W-A</Data><NamedCell ss:Name="Print_Area"/></Cell>
    <Cell><Data ss:Type="String">YDR318W</Data><NamedCell ss:Name="Print_Area"/></Cell>
    <Cell><Data ss:Type="String">affinitycapturewestern</Data><NamedCell
      ss:Name="Print_Area"/></Cell>
    <Cell><Data ss:Type="Number">14633972</Data><NamedCell ss:Name="Print_Area"/></Cell>
   </Row>
   <Row>
    <Cell><Data ss:Type="String">YAL034W-A</Data><NamedCell ss:Name="Print_Area"/></Cell>
    <Cell><Data ss:Type="String">YER018C</Data><NamedCell ss:Name="Print_Area"/></Cell>
    <Cell><Data ss:Type="String">affinitycapturems</Data><NamedCell
      ss:Name="Print_Area"/></Cell>
    <Cell><Data ss:Type="Number">14565975</Data><NamedCell ss:Name="Print_Area"/></Cell>
   </Row>
   <Row>
    <Cell><Data ss:Type="String">YAL034W-A</Data><NamedCell ss:Name="Print_Area"/></Cell>
    <Cell><Data ss:Type="String">YER018C</Data><NamedCell ss:Name="Print_Area"/></Cell>
    <Cell><Data ss:Type="String">affinitycapturewestern</Data><NamedCell
      ss:Name="Print_Area"/></Cell>
    <Cell><Data ss:Type="Number">14633972</Data><NamedCell ss:Name="Print_Area"/></Cell>
   </Row>
   <Row>
    <Cell><Data ss:Type="String">YAL034W-A</Data><NamedCell ss:Name="Print_Area"/></Cell>
    <Cell><Data ss:Type="String">YGL093W</Data><NamedCell ss:Name="Print_Area"/></Cell>
    <Cell><Data ss:Type="String">affinitycapturewestern</Data><NamedCell
      ss:Name="Print_Area"/></Cell>
    <Cell><Data ss:Type="Number">14633972</Data><NamedCell ss:Name="Print_Area"/></Cell>
   </Row>
   <Row>
    <Cell><Data ss:Type="String">YAL034W-A</Data><NamedCell ss:Name="Print_Area"/></Cell>
    <Cell><Data ss:Type="String">YGL093W</Data><NamedCell ss:Name="Print_Area"/></Cell>
    <Cell><Data ss:Type="String">affinitycapturems</Data><NamedCell
      ss:Name="Print_Area"/></Cell>
    <Cell><Data ss:Type="Number">14565975</Data><NamedCell ss:Name="Print_Area"/></Cell>
   </Row>
   <Row>
    <Cell><Data ss:Type="String">YAL034W-A</Data><NamedCell ss:Name="Print_Area"/></Cell>
    <Cell><Data ss:Type="String">YIL144W</Data><NamedCell ss:Name="Print_Area"/></Cell>
    <Cell><Data ss:Type="String">affinitycapturewestern</Data><NamedCell
      ss:Name="Print_Area"/></Cell>
    <Cell><Data ss:Type="Number">14633972</Data><NamedCell ss:Name="Print_Area"/></Cell>
   </Row>
   <Row>
    <Cell><Data ss:Type="String">YAL034W-A</Data><NamedCell ss:Name="Print_Area"/></Cell>
    <Cell><Data ss:Type="String">YIL144W</Data><NamedCell ss:Name="Print_Area"/></Cell>
    <Cell><Data ss:Type="String">affinitycapturems</Data><NamedCell
      ss:Name="Print_Area"/></Cell>
    <Cell><Data ss:Type="Number">14565975</Data><NamedCell ss:Name="Print_Area"/></Cell>
   </Row>
   <Row>
    <Cell><Data ss:Type="String">YAL034W-A</Data><NamedCell ss:Name="Print_Area"/></Cell>
    <Cell><Data ss:Type="String">YIR010W</Data><NamedCell ss:Name="Print_Area"/></Cell>
    <Cell><Data ss:Type="String">affinitycapturems</Data><NamedCell
      ss:Name="Print_Area"/></Cell>
    <Cell><Data ss:Type="Number">16554755</Data><NamedCell ss:Name="Print_Area"/></Cell>
   </Row>
   <Row>
    <Cell><Data ss:Type="String">YAL034W-A</Data><NamedCell ss:Name="Print_Area"/></Cell>
    <Cell><Data ss:Type="String">YIR010W</Data><NamedCell ss:Name="Print_Area"/></Cell>
    <Cell><Data ss:Type="String">affinitycapturems</Data><NamedCell
      ss:Name="Print_Area"/></Cell>
    <Cell><Data ss:Type="Number">16429126</Data><NamedCell ss:Name="Print_Area"/></Cell>
   </Row>
   <Row>
    <Cell><Data ss:Type="String">YAL034W-A</Data><NamedCell ss:Name="Print_Area"/></Cell>
    <Cell><Data ss:Type="String">YIR010W</Data><NamedCell ss:Name="Print_Area"/></Cell>
    <Cell><Data ss:Type="String">affinitycapturems</Data><NamedCell
      ss:Name="Print_Area"/></Cell>
    <Cell><Data ss:Type="Number">14581449</Data><NamedCell ss:Name="Print_Area"/></Cell>
   </Row>
   <Row>
    <Cell><Data ss:Type="String">YAL034W-A</Data><NamedCell ss:Name="Print_Area"/></Cell>
    <Cell><Data ss:Type="String">YIR010W</Data><NamedCell ss:Name="Print_Area"/></Cell>
    <Cell><Data ss:Type="String">affinitycapturewestern</Data><NamedCell
      ss:Name="Print_Area"/></Cell>
    <Cell><Data ss:Type="Number">14633972</Data><NamedCell ss:Name="Print_Area"/></Cell>
   </Row>
   <Row>
    <Cell><Data ss:Type="String">YAL034W-A</Data><NamedCell ss:Name="Print_Area"/></Cell>
    <Cell><Data ss:Type="String">YIR010W</Data><NamedCell ss:Name="Print_Area"/></Cell>
    <Cell><Data ss:Type="String">affinitycapturems</Data><NamedCell
      ss:Name="Print_Area"/></Cell>
    <Cell><Data ss:Type="Number">14690591</Data><NamedCell ss:Name="Print_Area"/></Cell>
   </Row>
   <Row>
    <Cell><Data ss:Type="String">YAL034W-A</Data><NamedCell ss:Name="Print_Area"/></Cell>
    <Cell><Data ss:Type="String">YIR010W</Data><NamedCell ss:Name="Print_Area"/></Cell>
    <Cell><Data ss:Type="String">affinitycapturems</Data><NamedCell
      ss:Name="Print_Area"/></Cell>
    <Cell><Data ss:Type="Number">14565975</Data><NamedCell ss:Name="Print_Area"/></Cell>
   </Row>
   <Row>
    <Cell><Data ss:Type="String">YAL034W-A</Data><NamedCell ss:Name="Print_Area"/></Cell>
    <Cell><Data ss:Type="String">YIR010W</Data><NamedCell ss:Name="Print_Area"/></Cell>
    <Cell><Data ss:Type="String">affinitycapturewestern</Data><NamedCell
      ss:Name="Print_Area"/></Cell>
    <Cell><Data ss:Type="Number">14602074</Data><NamedCell ss:Name="Print_Area"/></Cell>
   </Row>
   <Row>
    <Cell><Data ss:Type="String">YAL034W-A</Data><NamedCell ss:Name="Print_Area"/></Cell>
    <Cell><Data ss:Type="String">YJR112W</Data><NamedCell ss:Name="Print_Area"/></Cell>
    <Cell><Data ss:Type="String">affinitycapturewestern</Data><NamedCell
      ss:Name="Print_Area"/></Cell>
    <Cell><Data ss:Type="Number">14633972</Data><NamedCell ss:Name="Print_Area"/></Cell>
   </Row>
   <Row>
    <Cell><Data ss:Type="String">YAL034W-A</Data><NamedCell ss:Name="Print_Area"/></Cell>
    <Cell><Data ss:Type="String">YJR112W</Data><NamedCell ss:Name="Print_Area"/></Cell>
    <Cell><Data ss:Type="String">cofractionation</Data><NamedCell
      ss:Name="Print_Area"/></Cell>
    <Cell><Data ss:Type="Number">14633972</Data><NamedCell ss:Name="Print_Area"/></Cell>
   </Row>
   <Row>
    <Cell><Data ss:Type="String">YAL034W-A</Data><NamedCell ss:Name="Print_Area"/></Cell>
    <Cell><Data ss:Type="String">YJR112W</Data><NamedCell ss:Name="Print_Area"/></Cell>
    <Cell><Data ss:Type="String">affinitycapturems</Data><NamedCell
      ss:Name="Print_Area"/></Cell>
    <Cell><Data ss:Type="Number">14581449</Data><NamedCell ss:Name="Print_Area"/></Cell>
   </Row>
   <Row>
    <Cell><Data ss:Type="String">YAL034W-A</Data><NamedCell ss:Name="Print_Area"/></Cell>
    <Cell><Data ss:Type="String">YJR112W</Data><NamedCell ss:Name="Print_Area"/></Cell>
    <Cell><Data ss:Type="String">affinitycapturems</Data><NamedCell
      ss:Name="Print_Area"/></Cell>
    <Cell><Data ss:Type="Number">14565975</Data><NamedCell ss:Name="Print_Area"/></Cell>
   </Row>
   <Row>
    <Cell><Data ss:Type="String">YAL034W-A</Data><NamedCell ss:Name="Print_Area"/></Cell>
    <Cell><Data ss:Type="String">YJR112W</Data><NamedCell ss:Name="Print_Area"/></Cell>
    <Cell><Data ss:Type="String">affinitycapturems</Data><NamedCell
      ss:Name="Print_Area"/></Cell>
    <Cell><Data ss:Type="Number">16429126</Data><NamedCell ss:Name="Print_Area"/></Cell>
   </Row>
   <Row>
    <Cell><Data ss:Type="String">YAL034W-A</Data><NamedCell ss:Name="Print_Area"/></Cell>
    <Cell><Data ss:Type="String">YJR112W</Data><NamedCell ss:Name="Print_Area"/></Cell>
    <Cell><Data ss:Type="String">affinitycapturems</Data><NamedCell
      ss:Name="Print_Area"/></Cell>
    <Cell><Data ss:Type="Number">16554755</Data><NamedCell ss:Name="Print_Area"/></Cell>
   </Row>
   <Row>
    <Cell><Data ss:Type="String">YAL034W-A</Data><NamedCell ss:Name="Print_Area"/></Cell>
    <Cell><Data ss:Type="String">YKL049C</Data><NamedCell ss:Name="Print_Area"/></Cell>
    <Cell><Data ss:Type="String">affinitycapturewestern</Data><NamedCell
      ss:Name="Print_Area"/></Cell>
    <Cell><Data ss:Type="Number">14633972</Data><NamedCell ss:Name="Print_Area"/></Cell>
   </Row>
   <Row>
    <Cell><Data ss:Type="String">YAL034W-A</Data><NamedCell ss:Name="Print_Area"/></Cell>
    <Cell><Data ss:Type="String">YKL049C</Data><NamedCell ss:Name="Print_Area"/></Cell>
    <Cell><Data ss:Type="String">affinitycapturewestern</Data><NamedCell
      ss:Name="Print_Area"/></Cell>
    <Cell><Data ss:Type="Number">14602074</Data><NamedCell ss:Name="Print_Area"/></Cell>
   </Row>
   <Row>
    <Cell><Data ss:Type="String">YAL034W-A</Data><NamedCell ss:Name="Print_Area"/></Cell>
    <Cell><Data ss:Type="String">YMR117C</Data><NamedCell ss:Name="Print_Area"/></Cell>
    <Cell><Data ss:Type="String">affinitycapturewestern</Data><NamedCell
      ss:Name="Print_Area"/></Cell>
    <Cell><Data ss:Type="Number">14633972</Data><NamedCell ss:Name="Print_Area"/></Cell>
   </Row>
   <Row>
    <Cell><Data ss:Type="String">YAL034W-A</Data><NamedCell ss:Name="Print_Area"/></Cell>
    <Cell><Data ss:Type="String">YMR117C</Data><NamedCell ss:Name="Print_Area"/></Cell>
    <Cell><Data ss:Type="String">affinitycapturems</Data><NamedCell
      ss:Name="Print_Area"/></Cell>
    <Cell><Data ss:Type="Number">14565975</Data><NamedCell ss:Name="Print_Area"/></Cell>
   </Row>
   <Row>
    <Cell><Data ss:Type="String">YAL034W-A</Data><NamedCell ss:Name="Print_Area"/></Cell>
    <Cell><Data ss:Type="String">YPL233W</Data><NamedCell ss:Name="Print_Area"/></Cell>
    <Cell><Data ss:Type="String">affinitycapturems</Data><NamedCell
      ss:Name="Print_Area"/></Cell>
    <Cell><Data ss:Type="Number">14565975</Data><NamedCell ss:Name="Print_Area"/></Cell>
   </Row>
   <Row>
    <Cell><Data ss:Type="String">YAL034W-A</Data><NamedCell ss:Name="Print_Area"/></Cell>
    <Cell><Data ss:Type="String">YPL233W</Data><NamedCell ss:Name="Print_Area"/></Cell>
    <Cell><Data ss:Type="String">affinitycapturems</Data><NamedCell
      ss:Name="Print_Area"/></Cell>
    <Cell><Data ss:Type="Number">14581449</Data><NamedCell ss:Name="Print_Area"/></Cell>
   </Row>
   <Row>
    <Cell><Data ss:Type="String">YAL034W-A</Data><NamedCell ss:Name="Print_Area"/></Cell>
    <Cell><Data ss:Type="String">YPL233W</Data><NamedCell ss:Name="Print_Area"/></Cell>
    <Cell><Data ss:Type="String">affinitycapturems</Data><NamedCell
      ss:Name="Print_Area"/></Cell>
    <Cell><Data ss:Type="Number">14690591</Data><NamedCell ss:Name="Print_Area"/></Cell>
   </Row>
   <Row>
    <Cell><Data ss:Type="String">YAL034W-A</Data><NamedCell ss:Name="Print_Area"/></Cell>
    <Cell><Data ss:Type="String">YPL233W</Data><NamedCell ss:Name="Print_Area"/></Cell>
    <Cell><Data ss:Type="String">affinitycapturewestern</Data><NamedCell
      ss:Name="Print_Area"/></Cell>
    <Cell><Data ss:Type="Number">14633972</Data><NamedCell ss:Name="Print_Area"/></Cell>
   </Row>
   <Row>
    <Cell><Data ss:Type="String">YAL034W-A</Data><NamedCell ss:Name="Print_Area"/></Cell>
    <Cell><Data ss:Type="String">YPR046W</Data><NamedCell ss:Name="Print_Area"/></Cell>
    <Cell><Data ss:Type="String">affinitycapturewestern</Data><NamedCell
      ss:Name="Print_Area"/></Cell>
    <Cell><Data ss:Type="Number">14633972</Data><NamedCell ss:Name="Print_Area"/></Cell>
   </Row>
   <Row>
    <Cell><Data ss:Type="String">YAL034W-A</Data><NamedCell ss:Name="Print_Area"/></Cell>
    <Cell><Data ss:Type="String">YPR046W</Data><NamedCell ss:Name="Print_Area"/></Cell>
    <Cell><Data ss:Type="String">affinitycapturems</Data><NamedCell
      ss:Name="Print_Area"/></Cell>
    <Cell><Data ss:Type="Number">12408861</Data><NamedCell ss:Name="Print_Area"/></Cell>
   </Row>
   <Row>
    <Cell><Data ss:Type="String">YAL035W</Data><NamedCell ss:Name="Print_Area"/></Cell>
    <Cell><Data ss:Type="String">YDL220C</Data><NamedCell ss:Name="Print_Area"/></Cell>
    <Cell><Data ss:Type="String">twohybrid</Data><NamedCell ss:Name="Print_Area"/></Cell>
    <Cell><Data ss:Type="Number">10898792</Data><NamedCell ss:Name="Print_Area"/></Cell>
   </Row>
   <Row>
    <Cell><Data ss:Type="String">YAL035W</Data><NamedCell ss:Name="Print_Area"/></Cell>
    <Cell><Data ss:Type="String">YDL220C</Data><NamedCell ss:Name="Print_Area"/></Cell>
    <Cell><Data ss:Type="String">unknown</Data><NamedCell ss:Name="Print_Area"/></Cell>
    <Cell><Data ss:Type="Number">10898792</Data><NamedCell ss:Name="Print_Area"/></Cell>
   </Row>
   <Row>
    <Cell><Data ss:Type="String">YAL035W</Data><NamedCell ss:Name="Print_Area"/></Cell>
    <Cell><Data ss:Type="String">YER036C</Data><NamedCell ss:Name="Print_Area"/></Cell>
    <Cell><Data ss:Type="String">affinitycapturems</Data><NamedCell
      ss:Name="Print_Area"/></Cell>
    <Cell><Data ss:Type="Number">16260602</Data><NamedCell ss:Name="Print_Area"/></Cell>
   </Row>
   <Row>
    <Cell><Data ss:Type="String">YAL035W</Data><NamedCell ss:Name="Print_Area"/></Cell>
    <Cell><Data ss:Type="String">YER036C</Data><NamedCell ss:Name="Print_Area"/></Cell>
    <Cell><Data ss:Type="String">affinitycapturems</Data><NamedCell
      ss:Name="Print_Area"/></Cell>
    <Cell><Data ss:Type="Number">16429126</Data><NamedCell ss:Name="Print_Area"/></Cell>
   </Row>
   <Row>
    <Cell><Data ss:Type="String">YAL035W</Data><NamedCell ss:Name="Print_Area"/></Cell>
    <Cell><Data ss:Type="String">YER036C</Data><NamedCell ss:Name="Print_Area"/></Cell>
    <Cell><Data ss:Type="String">affinitycapturems</Data><NamedCell
      ss:Name="Print_Area"/></Cell>
    <Cell><Data ss:Type="Number">11805826</Data><NamedCell ss:Name="Print_Area"/></Cell>
   </Row>
   <Row>
    <Cell><Data ss:Type="String">YAL035W</Data><NamedCell ss:Name="Print_Area"/></Cell>
    <Cell><Data ss:Type="String">YMR260C</Data><NamedCell ss:Name="Print_Area"/></Cell>
    <Cell><Data ss:Type="String">twohybrid</Data><NamedCell ss:Name="Print_Area"/></Cell>
    <Cell><Data ss:Type="Number">10982835</Data><NamedCell ss:Name="Print_Area"/></Cell>
   </Row>
   <Row>
    <Cell><Data ss:Type="String">YAL035W</Data><NamedCell ss:Name="Print_Area"/></Cell>
    <Cell><Data ss:Type="String">YMR260C</Data><NamedCell ss:Name="Print_Area"/></Cell>
    <Cell><Data ss:Type="String">affinitycapturewestern</Data><NamedCell
      ss:Name="Print_Area"/></Cell>
    <Cell><Data ss:Type="Number">12514125</Data><NamedCell ss:Name="Print_Area"/></Cell>
   </Row>
   <Row>
    <Cell><Data ss:Type="String">YAL035W</Data><NamedCell ss:Name="Print_Area"/></Cell>
    <Cell><Data ss:Type="String">YMR260C</Data><NamedCell ss:Name="Print_Area"/></Cell>
    <Cell><Data ss:Type="String">reconstitutedcomplex</Data><NamedCell
      ss:Name="Print_Area"/></Cell>
    <Cell><Data ss:Type="Number">10982835</Data><NamedCell ss:Name="Print_Area"/></Cell>
   </Row>
   <Row>
    <Cell><Data ss:Type="String">YAL035W</Data><NamedCell ss:Name="Print_Area"/></Cell>
    <Cell><Data ss:Type="String">YMR260C</Data><NamedCell ss:Name="Print_Area"/></Cell>
    <Cell><Data ss:Type="String">twohybrid</Data><NamedCell ss:Name="Print_Area"/></Cell>
    <Cell><Data ss:Type="Number">12514125</Data><NamedCell ss:Name="Print_Area"/></Cell>
   </Row>
   <Row>
    <Cell><Data ss:Type="String">YAL035W</Data><NamedCell ss:Name="Print_Area"/></Cell>
    <Cell><Data ss:Type="String">YMR260C</Data><NamedCell ss:Name="Print_Area"/></Cell>
    <Cell><Data ss:Type="String">unknown</Data><NamedCell ss:Name="Print_Area"/></Cell>
    <Cell><Data ss:Type="Number">10982835</Data><NamedCell ss:Name="Print_Area"/></Cell>
   </Row>
   <Row>
    <Cell><Data ss:Type="String">YAL035W</Data><NamedCell ss:Name="Print_Area"/></Cell>
    <Cell><Data ss:Type="String">YMR260C</Data><NamedCell ss:Name="Print_Area"/></Cell>
    <Cell><Data ss:Type="String">affinitycapturewestern</Data><NamedCell
      ss:Name="Print_Area"/></Cell>
    <Cell><Data ss:Type="Number">10982835</Data><NamedCell ss:Name="Print_Area"/></Cell>
   </Row>
   <Row>
    <Cell><Data ss:Type="String">YAL038W</Data><NamedCell ss:Name="Print_Area"/></Cell>
    <Cell><Data ss:Type="String">YDR510W</Data><NamedCell ss:Name="Print_Area"/></Cell>
    <Cell><Data ss:Type="String">affinitycapturems</Data><NamedCell
      ss:Name="Print_Area"/></Cell>
    <Cell><Data ss:Type="Number">15292183</Data><NamedCell ss:Name="Print_Area"/></Cell>
   </Row>
   <Row>
    <Cell><Data ss:Type="String">YAL038W</Data><NamedCell ss:Name="Print_Area"/></Cell>
    <Cell><Data ss:Type="String">YDR510W</Data><NamedCell ss:Name="Print_Area"/></Cell>
    <Cell><Data ss:Type="String">affinitycapturems</Data><NamedCell
      ss:Name="Print_Area"/></Cell>
    <Cell><Data ss:Type="Number">15590687</Data><NamedCell ss:Name="Print_Area"/></Cell>
   </Row>
   <Row>
    <Cell><Data ss:Type="String">YAL038W</Data><NamedCell ss:Name="Print_Area"/></Cell>
    <Cell><Data ss:Type="String">YJL164C</Data><NamedCell ss:Name="Print_Area"/></Cell>
    <Cell><Data ss:Type="String">biochemicalactivity</Data><NamedCell
      ss:Name="Print_Area"/></Cell>
    <Cell><Data ss:Type="Number">12063246</Data><NamedCell ss:Name="Print_Area"/></Cell>
   </Row>
   <Row>
    <Cell><Data ss:Type="String">YAL038W</Data><NamedCell ss:Name="Print_Area"/></Cell>
    <Cell><Data ss:Type="String">YJL164C</Data><NamedCell ss:Name="Print_Area"/></Cell>
    <Cell><Data ss:Type="String">biochemicalactivity</Data><NamedCell
      ss:Name="Print_Area"/></Cell>
    <Cell><Data ss:Type="Number">11877433</Data><NamedCell ss:Name="Print_Area"/></Cell>
   </Row>
   <Row>
    <Cell><Data ss:Type="String">YAL038W</Data><NamedCell ss:Name="Print_Area"/></Cell>
    <Cell><Data ss:Type="String">YNL307C</Data><NamedCell ss:Name="Print_Area"/></Cell>
    <Cell><Data ss:Type="String">unknown</Data><NamedCell ss:Name="Print_Area"/></Cell>
    <Cell><Data ss:Type="Number">9209064</Data><NamedCell ss:Name="Print_Area"/></Cell>
   </Row>
   <Row>
    <Cell><Data ss:Type="String">YAL038W</Data><NamedCell ss:Name="Print_Area"/></Cell>
    <Cell><Data ss:Type="String">YNL307C</Data><NamedCell ss:Name="Print_Area"/></Cell>
    <Cell><Data ss:Type="String">affinitycapturewestern</Data><NamedCell
      ss:Name="Print_Area"/></Cell>
    <Cell><Data ss:Type="Number">9209064</Data><NamedCell ss:Name="Print_Area"/></Cell>
   </Row>
   <Row>
    <Cell><Data ss:Type="String">YAL038W</Data><NamedCell ss:Name="Print_Area"/></Cell>
    <Cell><Data ss:Type="String">YNL307C</Data><NamedCell ss:Name="Print_Area"/></Cell>
    <Cell><Data ss:Type="String">biochemicalactivity</Data><NamedCell
      ss:Name="Print_Area"/></Cell>
    <Cell><Data ss:Type="Number">9209064</Data><NamedCell ss:Name="Print_Area"/></Cell>
   </Row>
   <Row>
    <Cell><Data ss:Type="String">YAL038W</Data><NamedCell ss:Name="Print_Area"/></Cell>
    <Cell><Data ss:Type="String">YNL307C</Data><NamedCell ss:Name="Print_Area"/></Cell>
    <Cell><Data ss:Type="String">twohybrid</Data><NamedCell ss:Name="Print_Area"/></Cell>
    <Cell><Data ss:Type="Number">9209064</Data><NamedCell ss:Name="Print_Area"/></Cell>
   </Row>
   <Row>
    <Cell><Data ss:Type="String">YAL040C</Data><NamedCell ss:Name="Print_Area"/></Cell>
    <Cell><Data ss:Type="String">YBR160W</Data><NamedCell ss:Name="Print_Area"/></Cell>
    <Cell><Data ss:Type="String">unknown</Data><NamedCell ss:Name="Print_Area"/></Cell>
    <Cell><Data ss:Type="Number">1316273</Data><NamedCell ss:Name="Print_Area"/></Cell>
   </Row>
   <Row>
    <Cell><Data ss:Type="String">YAL040C</Data><NamedCell ss:Name="Print_Area"/></Cell>
    <Cell><Data ss:Type="String">YBR160W</Data><NamedCell ss:Name="Print_Area"/></Cell>
    <Cell><Data ss:Type="String">affinitycapturewestern</Data><NamedCell
      ss:Name="Print_Area"/></Cell>
    <Cell><Data ss:Type="Number">12024050</Data><NamedCell ss:Name="Print_Area"/></Cell>
   </Row>
   <Row>
    <Cell><Data ss:Type="String">YAL040C</Data><NamedCell ss:Name="Print_Area"/></Cell>
    <Cell><Data ss:Type="String">YBR160W</Data><NamedCell ss:Name="Print_Area"/></Cell>
    <Cell><Data ss:Type="String">biochemicalactivity</Data><NamedCell
      ss:Name="Print_Area"/></Cell>
    <Cell><Data ss:Type="Number">14574415</Data><NamedCell ss:Name="Print_Area"/></Cell>
   </Row>
   <Row>
    <Cell><Data ss:Type="String">YAL040C</Data><NamedCell ss:Name="Print_Area"/></Cell>
    <Cell><Data ss:Type="String">YBR160W</Data><NamedCell ss:Name="Print_Area"/></Cell>
    <Cell><Data ss:Type="String">affinitycapturewestern</Data><NamedCell
      ss:Name="Print_Area"/></Cell>
    <Cell><Data ss:Type="Number">1316273</Data><NamedCell ss:Name="Print_Area"/></Cell>
   </Row>
   <Row>
    <Cell><Data ss:Type="String">YAL040C</Data><NamedCell ss:Name="Print_Area"/></Cell>
    <Cell><Data ss:Type="String">YBR160W</Data><NamedCell ss:Name="Print_Area"/></Cell>
    <Cell><Data ss:Type="String">biochemicalactivity</Data><NamedCell
      ss:Name="Print_Area"/></Cell>
    <Cell><Data ss:Type="Number">7823941</Data><NamedCell ss:Name="Print_Area"/></Cell>
   </Row>
   <Row>
    <Cell><Data ss:Type="String">YAL040C</Data><NamedCell ss:Name="Print_Area"/></Cell>
    <Cell><Data ss:Type="String">YBR160W</Data><NamedCell ss:Name="Print_Area"/></Cell>
    <Cell><Data ss:Type="String">biochemicalactivity</Data><NamedCell
      ss:Name="Print_Area"/></Cell>
    <Cell><Data ss:Type="Number">1316273</Data><NamedCell ss:Name="Print_Area"/></Cell>
   </Row>
   <Row>
    <Cell><Data ss:Type="String">YAL040C</Data><NamedCell ss:Name="Print_Area"/></Cell>
    <Cell><Data ss:Type="String">YBR160W</Data><NamedCell ss:Name="Print_Area"/></Cell>
    <Cell><Data ss:Type="String">reconstitutedcomplex</Data><NamedCell
      ss:Name="Print_Area"/></Cell>
    <Cell><Data ss:Type="Number">14574415</Data><NamedCell ss:Name="Print_Area"/></Cell>
   </Row>
   <Row>
    <Cell><Data ss:Type="String">YAL040C</Data><NamedCell ss:Name="Print_Area"/></Cell>
    <Cell><Data ss:Type="String">YBR160W</Data><NamedCell ss:Name="Print_Area"/></Cell>
    <Cell><Data ss:Type="String">affinitycapturewestern</Data><NamedCell
      ss:Name="Print_Area"/></Cell>
    <Cell><Data ss:Type="Number">16200502</Data><NamedCell ss:Name="Print_Area"/></Cell>
   </Row>
   <Row>
    <Cell><Data ss:Type="String">YAL040C</Data><NamedCell ss:Name="Print_Area"/></Cell>
    <Cell><Data ss:Type="String">YJL157C</Data><NamedCell ss:Name="Print_Area"/></Cell>
    <Cell><Data ss:Type="String">affinitycapturewestern</Data><NamedCell
      ss:Name="Print_Area"/></Cell>
    <Cell><Data ss:Type="Number">8395009</Data><NamedCell ss:Name="Print_Area"/></Cell>
   </Row>
   <Row>
    <Cell><Data ss:Type="String">YAL040C</Data><NamedCell ss:Name="Print_Area"/></Cell>
    <Cell><Data ss:Type="String">YJL157C</Data><NamedCell ss:Name="Print_Area"/></Cell>
    <Cell><Data ss:Type="String">affinitycapturewestern</Data><NamedCell
      ss:Name="Print_Area"/></Cell>
    <Cell><Data ss:Type="Number">8066461</Data><NamedCell ss:Name="Print_Area"/></Cell>
   </Row>
   <Row>
    <Cell><Data ss:Type="String">YAL040C</Data><NamedCell ss:Name="Print_Area"/></Cell>
    <Cell><Data ss:Type="String">YJL157C</Data><NamedCell ss:Name="Print_Area"/></Cell>
    <Cell><Data ss:Type="String">unknown</Data><NamedCell ss:Name="Print_Area"/></Cell>
    <Cell><Data ss:Type="Number">8395009</Data><NamedCell ss:Name="Print_Area"/></Cell>
   </Row>
   <Row>
    <Cell><Data ss:Type="String">YAL040C</Data><NamedCell ss:Name="Print_Area"/></Cell>
    <Cell><Data ss:Type="String">YNL064C</Data><NamedCell ss:Name="Print_Area"/></Cell>
    <Cell><Data ss:Type="String">affinitycapturewestern</Data><NamedCell
      ss:Name="Print_Area"/></Cell>
    <Cell><Data ss:Type="Number">8668184</Data><NamedCell ss:Name="Print_Area"/></Cell>
   </Row>
   <Row>
    <Cell><Data ss:Type="String">YAL040C</Data><NamedCell ss:Name="Print_Area"/></Cell>
    <Cell><Data ss:Type="String">YNL064C</Data><NamedCell ss:Name="Print_Area"/></Cell>
    <Cell><Data ss:Type="String">unknown</Data><NamedCell ss:Name="Print_Area"/></Cell>
    <Cell><Data ss:Type="Number">8668184</Data><NamedCell ss:Name="Print_Area"/></Cell>
   </Row>
   <Row>
    <Cell><Data ss:Type="String">YAL041W</Data><NamedCell ss:Name="Print_Area"/></Cell>
    <Cell><Data ss:Type="String">YBR200W</Data><NamedCell ss:Name="Print_Area"/></Cell>
    <Cell><Data ss:Type="String">affinitycapturewestern</Data><NamedCell
      ss:Name="Print_Area"/></Cell>
    <Cell><Data ss:Type="Number">11483498</Data><NamedCell ss:Name="Print_Area"/></Cell>
   </Row>
   <Row>
    <Cell><Data ss:Type="String">YAL041W</Data><NamedCell ss:Name="Print_Area"/></Cell>
    <Cell><Data ss:Type="String">YBR200W</Data><NamedCell ss:Name="Print_Area"/></Cell>
    <Cell><Data ss:Type="String">affinitycapturems</Data><NamedCell
      ss:Name="Print_Area"/></Cell>
    <Cell><Data ss:Type="Number">11805826</Data><NamedCell ss:Name="Print_Area"/></Cell>
   </Row>
   <Row>
    <Cell><Data ss:Type="String">YAL041W</Data><NamedCell ss:Name="Print_Area"/></Cell>
    <Cell><Data ss:Type="String">YBR200W</Data><NamedCell ss:Name="Print_Area"/></Cell>
    <Cell><Data ss:Type="String">affinitycapturewestern</Data><NamedCell
      ss:Name="Print_Area"/></Cell>
    <Cell><Data ss:Type="Number">8754808</Data><NamedCell ss:Name="Print_Area"/></Cell>
   </Row>
   <Row>
    <Cell><Data ss:Type="String">YAL041W</Data><NamedCell ss:Name="Print_Area"/></Cell>
    <Cell><Data ss:Type="String">YBR200W</Data><NamedCell ss:Name="Print_Area"/></Cell>
    <Cell><Data ss:Type="String">reconstitutedcomplex</Data><NamedCell
      ss:Name="Print_Area"/></Cell>
    <Cell><Data ss:Type="Number">7822288</Data><NamedCell ss:Name="Print_Area"/></Cell>
   </Row>
   <Row>
    <Cell><Data ss:Type="String">YAL041W</Data><NamedCell ss:Name="Print_Area"/></Cell>
    <Cell><Data ss:Type="String">YBR200W</Data><NamedCell ss:Name="Print_Area"/></Cell>
    <Cell><Data ss:Type="String">twohybrid</Data><NamedCell ss:Name="Print_Area"/></Cell>
    <Cell><Data ss:Type="Number">7962098</Data><NamedCell ss:Name="Print_Area"/></Cell>
   </Row>
   <Row>
    <Cell><Data ss:Type="String">YAL041W</Data><NamedCell ss:Name="Print_Area"/></Cell>
    <Cell><Data ss:Type="String">YBR200W</Data><NamedCell ss:Name="Print_Area"/></Cell>
    <Cell><Data ss:Type="String">affinitycapturewestern</Data><NamedCell
      ss:Name="Print_Area"/></Cell>
    <Cell><Data ss:Type="Number">7822288</Data><NamedCell ss:Name="Print_Area"/></Cell>
   </Row>
   <Row>
    <Cell><Data ss:Type="String">YAL041W</Data><NamedCell ss:Name="Print_Area"/></Cell>
    <Cell><Data ss:Type="String">YBR200W</Data><NamedCell ss:Name="Print_Area"/></Cell>
    <Cell><Data ss:Type="String">reconstitutedcomplex</Data><NamedCell
      ss:Name="Print_Area"/></Cell>
    <Cell><Data ss:Type="Number">7962098</Data><NamedCell ss:Name="Print_Area"/></Cell>
   </Row>
   <Row>
    <Cell><Data ss:Type="String">YAL041W</Data><NamedCell ss:Name="Print_Area"/></Cell>
    <Cell><Data ss:Type="String">YBR200W</Data><NamedCell ss:Name="Print_Area"/></Cell>
    <Cell><Data ss:Type="String">twohybrid</Data><NamedCell ss:Name="Print_Area"/></Cell>
    <Cell><Data ss:Type="Number">11483497</Data><NamedCell ss:Name="Print_Area"/></Cell>
   </Row>
   <Row>
    <Cell><Data ss:Type="String">YAL041W</Data><NamedCell ss:Name="Print_Area"/></Cell>
    <Cell><Data ss:Type="String">YBR200W</Data><NamedCell ss:Name="Print_Area"/></Cell>
    <Cell><Data ss:Type="String">reconstitutedcomplex</Data><NamedCell
      ss:Name="Print_Area"/></Cell>
    <Cell><Data ss:Type="Number">15037079</Data><NamedCell ss:Name="Print_Area"/></Cell>
   </Row>
   <Row>
    <Cell><Data ss:Type="String">YAL041W</Data><NamedCell ss:Name="Print_Area"/></Cell>
    <Cell><Data ss:Type="String">YBR200W</Data><NamedCell ss:Name="Print_Area"/></Cell>
    <Cell><Data ss:Type="String">reconstitutedcomplex</Data><NamedCell
      ss:Name="Print_Area"/></Cell>
    <Cell><Data ss:Type="Number">11483497</Data><NamedCell ss:Name="Print_Area"/></Cell>
   </Row>
   <Row>
    <Cell><Data ss:Type="String">YAL041W</Data><NamedCell ss:Name="Print_Area"/></Cell>
    <Cell><Data ss:Type="String">YBR200W</Data><NamedCell ss:Name="Print_Area"/></Cell>
    <Cell><Data ss:Type="String">cocrystalstructure</Data><NamedCell
      ss:Name="Print_Area"/></Cell>
    <Cell><Data ss:Type="Number">11483498</Data><NamedCell ss:Name="Print_Area"/></Cell>
   </Row>
   <Row>
    <Cell><Data ss:Type="String">YAL041W</Data><NamedCell ss:Name="Print_Area"/></Cell>
    <Cell><Data ss:Type="String">YBR200W</Data><NamedCell ss:Name="Print_Area"/></Cell>
    <Cell><Data ss:Type="String">affinitycapturewestern</Data><NamedCell
      ss:Name="Print_Area"/></Cell>
    <Cell><Data ss:Type="Number">11113154</Data><NamedCell ss:Name="Print_Area"/></Cell>
   </Row>
   <Row>
    <Cell><Data ss:Type="String">YAL041W</Data><NamedCell ss:Name="Print_Area"/></Cell>
    <Cell><Data ss:Type="String">YBR200W</Data><NamedCell ss:Name="Print_Area"/></Cell>
    <Cell><Data ss:Type="String">unknown</Data><NamedCell ss:Name="Print_Area"/></Cell>
    <Cell><Data ss:Type="Number">7822288</Data><NamedCell ss:Name="Print_Area"/></Cell>
   </Row>
   <Row>
    <Cell><Data ss:Type="String">YAL041W</Data><NamedCell ss:Name="Print_Area"/></Cell>
    <Cell><Data ss:Type="String">YBR200W</Data><NamedCell ss:Name="Print_Area"/></Cell>
    <Cell><Data ss:Type="String">affinitycapturems</Data><NamedCell
      ss:Name="Print_Area"/></Cell>
    <Cell><Data ss:Type="Number">16429126</Data><NamedCell ss:Name="Print_Area"/></Cell>
   </Row>
   <Row>
    <Cell><Data ss:Type="String">YAL041W</Data><NamedCell ss:Name="Print_Area"/></Cell>
    <Cell><Data ss:Type="String">YBR200W</Data><NamedCell ss:Name="Print_Area"/></Cell>
    <Cell><Data ss:Type="String">unknown</Data><NamedCell ss:Name="Print_Area"/></Cell>
    <Cell><Data ss:Type="Number">7962098</Data><NamedCell ss:Name="Print_Area"/></Cell>
   </Row>
   <Row>
    <Cell><Data ss:Type="String">YAL041W</Data><NamedCell ss:Name="Print_Area"/></Cell>
    <Cell><Data ss:Type="String">YBR200W</Data><NamedCell ss:Name="Print_Area"/></Cell>
    <Cell><Data ss:Type="String">affinitycapturewestern</Data><NamedCell
      ss:Name="Print_Area"/></Cell>
    <Cell><Data ss:Type="Number">15647373</Data><NamedCell ss:Name="Print_Area"/></Cell>
   </Row>
   <Row>
    <Cell><Data ss:Type="String">YAL041W</Data><NamedCell ss:Name="Print_Area"/></Cell>
    <Cell><Data ss:Type="String">YBR200W</Data><NamedCell ss:Name="Print_Area"/></Cell>
    <Cell><Data ss:Type="String">twohybrid</Data><NamedCell ss:Name="Print_Area"/></Cell>
    <Cell><Data ss:Type="Number">9428768</Data><NamedCell ss:Name="Print_Area"/></Cell>
   </Row>
   <Row>
    <Cell><Data ss:Type="String">YAL041W</Data><NamedCell ss:Name="Print_Area"/></Cell>
    <Cell><Data ss:Type="String">YBR200W</Data><NamedCell ss:Name="Print_Area"/></Cell>
    <Cell><Data ss:Type="String">twohybrid</Data><NamedCell ss:Name="Print_Area"/></Cell>
    <Cell><Data ss:Type="Number">14988726</Data><NamedCell ss:Name="Print_Area"/></Cell>
   </Row>
   <Row>
    <Cell><Data ss:Type="String">YAL041W</Data><NamedCell ss:Name="Print_Area"/></Cell>
    <Cell><Data ss:Type="String">YBR200W</Data><NamedCell ss:Name="Print_Area"/></Cell>
    <Cell><Data ss:Type="String">twohybrid</Data><NamedCell ss:Name="Print_Area"/></Cell>
    <Cell><Data ss:Type="Number">11489916</Data><NamedCell ss:Name="Print_Area"/></Cell>
   </Row>
   <Row>
    <Cell><Data ss:Type="String">YAL041W</Data><NamedCell ss:Name="Print_Area"/></Cell>
    <Cell><Data ss:Type="String">YDR103W</Data><NamedCell ss:Name="Print_Area"/></Cell>
    <Cell><Data ss:Type="String">affinitycapturewestern</Data><NamedCell
      ss:Name="Print_Area"/></Cell>
    <Cell><Data ss:Type="Number">15657049</Data><NamedCell ss:Name="Print_Area"/></Cell>
   </Row>
   <Row>
    <Cell><Data ss:Type="String">YAL041W</Data><NamedCell ss:Name="Print_Area"/></Cell>
    <Cell><Data ss:Type="String">YDR103W</Data><NamedCell ss:Name="Print_Area"/></Cell>
    <Cell><Data ss:Type="String">reconstitutedcomplex</Data><NamedCell
      ss:Name="Print_Area"/></Cell>
    <Cell><Data ss:Type="Number">15657049</Data><NamedCell ss:Name="Print_Area"/></Cell>
   </Row>
   <Row>
    <Cell><Data ss:Type="String">YAL041W</Data><NamedCell ss:Name="Print_Area"/></Cell>
    <Cell><Data ss:Type="String">YGR152C</Data><NamedCell ss:Name="Print_Area"/></Cell>
    <Cell><Data ss:Type="String">unknown</Data><NamedCell ss:Name="Print_Area"/></Cell>
    <Cell><Data ss:Type="Number">7822288</Data><NamedCell ss:Name="Print_Area"/></Cell>
   </Row>
   <Row>
    <Cell><Data ss:Type="String">YAL041W</Data><NamedCell ss:Name="Print_Area"/></Cell>
    <Cell><Data ss:Type="String">YGR152C</Data><NamedCell ss:Name="Print_Area"/></Cell>
    <Cell><Data ss:Type="String">reconstitutedcomplex</Data><NamedCell
      ss:Name="Print_Area"/></Cell>
    <Cell><Data ss:Type="Number">7822288</Data><NamedCell ss:Name="Print_Area"/></Cell>
   </Row>
   <Row>
    <Cell><Data ss:Type="String">YAL041W</Data><NamedCell ss:Name="Print_Area"/></Cell>
    <Cell><Data ss:Type="String">YGR152C</Data><NamedCell ss:Name="Print_Area"/></Cell>
    <Cell><Data ss:Type="String">twohybrid</Data><NamedCell ss:Name="Print_Area"/></Cell>
    <Cell><Data ss:Type="Number">11489916</Data><NamedCell ss:Name="Print_Area"/></Cell>
   </Row>
   <Row>
    <Cell><Data ss:Type="String">YAL041W</Data><NamedCell ss:Name="Print_Area"/></Cell>
    <Cell><Data ss:Type="String">YGR152C</Data><NamedCell ss:Name="Print_Area"/></Cell>
    <Cell><Data ss:Type="String">reconstitutedcomplex</Data><NamedCell
      ss:Name="Print_Area"/></Cell>
    <Cell><Data ss:Type="Number">9114012</Data><NamedCell ss:Name="Print_Area"/></Cell>
   </Row>
   <Row>
    <Cell><Data ss:Type="String">YAL041W</Data><NamedCell ss:Name="Print_Area"/></Cell>
    <Cell><Data ss:Type="String">YGR152C</Data><NamedCell ss:Name="Print_Area"/></Cell>
    <Cell><Data ss:Type="String">affinitycapturewestern</Data><NamedCell
      ss:Name="Print_Area"/></Cell>
    <Cell><Data ss:Type="Number">9114012</Data><NamedCell ss:Name="Print_Area"/></Cell>
   </Row>
   <Row>
    <Cell><Data ss:Type="String">YAL041W</Data><NamedCell ss:Name="Print_Area"/></Cell>
    <Cell><Data ss:Type="String">YGR152C</Data><NamedCell ss:Name="Print_Area"/></Cell>
    <Cell><Data ss:Type="String">affinitycapturewestern</Data><NamedCell
      ss:Name="Print_Area"/></Cell>
    <Cell><Data ss:Type="Number">7822288</Data><NamedCell ss:Name="Print_Area"/></Cell>
   </Row>
   <Row>
    <Cell><Data ss:Type="String">YAL041W</Data><NamedCell ss:Name="Print_Area"/></Cell>
    <Cell><Data ss:Type="String">YJL157C</Data><NamedCell ss:Name="Print_Area"/></Cell>
    <Cell><Data ss:Type="String">twohybrid</Data><NamedCell ss:Name="Print_Area"/></Cell>
    <Cell><Data ss:Type="Number">14988726</Data><NamedCell ss:Name="Print_Area"/></Cell>
   </Row>
   <Row>
    <Cell><Data ss:Type="String">YAL041W</Data><NamedCell ss:Name="Print_Area"/></Cell>
    <Cell><Data ss:Type="String">YJL157C</Data><NamedCell ss:Name="Print_Area"/></Cell>
    <Cell><Data ss:Type="String">twohybrid</Data><NamedCell ss:Name="Print_Area"/></Cell>
    <Cell><Data ss:Type="Number">11489916</Data><NamedCell ss:Name="Print_Area"/></Cell>
   </Row>
   <Row>
    <Cell><Data ss:Type="String">YAL041W</Data><NamedCell ss:Name="Print_Area"/></Cell>
    <Cell><Data ss:Type="String">YJL157C</Data><NamedCell ss:Name="Print_Area"/></Cell>
    <Cell><Data ss:Type="String">affinitycapturewestern</Data><NamedCell
      ss:Name="Print_Area"/></Cell>
    <Cell><Data ss:Type="Number">10087263</Data><NamedCell ss:Name="Print_Area"/></Cell>
   </Row>
   <Row>
    <Cell><Data ss:Type="String">YAL041W</Data><NamedCell ss:Name="Print_Area"/></Cell>
    <Cell><Data ss:Type="String">YJL157C</Data><NamedCell ss:Name="Print_Area"/></Cell>
    <Cell><Data ss:Type="String">twohybrid</Data><NamedCell ss:Name="Print_Area"/></Cell>
    <Cell><Data ss:Type="Number">10087263</Data><NamedCell ss:Name="Print_Area"/></Cell>
   </Row>
   <Row>
    <Cell><Data ss:Type="String">YAL041W</Data><NamedCell ss:Name="Print_Area"/></Cell>
    <Cell><Data ss:Type="String">YJL157C</Data><NamedCell ss:Name="Print_Area"/></Cell>
    <Cell><Data ss:Type="String">reconstitutedcomplex</Data><NamedCell
      ss:Name="Print_Area"/></Cell>
    <Cell><Data ss:Type="Number">10087263</Data><NamedCell ss:Name="Print_Area"/></Cell>
   </Row>
   <Row>
    <Cell><Data ss:Type="String">YAL041W</Data><NamedCell ss:Name="Print_Area"/></Cell>
    <Cell><Data ss:Type="String">YJL157C</Data><NamedCell ss:Name="Print_Area"/></Cell>
    <Cell><Data ss:Type="String">unknown</Data><NamedCell ss:Name="Print_Area"/></Cell>
    <Cell><Data ss:Type="Number">10087263</Data><NamedCell ss:Name="Print_Area"/></Cell>
   </Row>
   <Row>
    <Cell><Data ss:Type="String">YAL041W</Data><NamedCell ss:Name="Print_Area"/></Cell>
    <Cell><Data ss:Type="String">YJL157C</Data><NamedCell ss:Name="Print_Area"/></Cell>
    <Cell><Data ss:Type="String">unknown</Data><NamedCell ss:Name="Print_Area"/></Cell>
    <Cell><Data ss:Type="Number">9822386</Data><NamedCell ss:Name="Print_Area"/></Cell>
   </Row>
   <Row>
    <Cell><Data ss:Type="String">YAL041W</Data><NamedCell ss:Name="Print_Area"/></Cell>
    <Cell><Data ss:Type="String">YJL157C</Data><NamedCell ss:Name="Print_Area"/></Cell>
    <Cell><Data ss:Type="String">twohybrid</Data><NamedCell ss:Name="Print_Area"/></Cell>
    <Cell><Data ss:Type="Number">14988725</Data><NamedCell ss:Name="Print_Area"/></Cell>
   </Row>
   <Row>
    <Cell><Data ss:Type="String">YAL041W</Data><NamedCell ss:Name="Print_Area"/></Cell>
    <Cell><Data ss:Type="String">YJL157C</Data><NamedCell ss:Name="Print_Area"/></Cell>
    <Cell><Data ss:Type="String">affinitycapturewestern</Data><NamedCell
      ss:Name="Print_Area"/></Cell>
    <Cell><Data ss:Type="Number">9822386</Data><NamedCell ss:Name="Print_Area"/></Cell>
   </Row>
   <Row>
    <Cell><Data ss:Type="String">YAL041W</Data><NamedCell ss:Name="Print_Area"/></Cell>
    <Cell><Data ss:Type="String">YJL157C</Data><NamedCell ss:Name="Print_Area"/></Cell>
    <Cell><Data ss:Type="String">twohybrid</Data><NamedCell ss:Name="Print_Area"/></Cell>
    <Cell><Data ss:Type="Number">9822386</Data><NamedCell ss:Name="Print_Area"/></Cell>
   </Row>
   <Row>
    <Cell><Data ss:Type="String">YAL041W</Data><NamedCell ss:Name="Print_Area"/></Cell>
    <Cell><Data ss:Type="String">YLR229C</Data><NamedCell ss:Name="Print_Area"/></Cell>
    <Cell><Data ss:Type="String">unknown</Data><NamedCell ss:Name="Print_Area"/></Cell>
    <Cell><Data ss:Type="Number">7822288</Data><NamedCell ss:Name="Print_Area"/></Cell>
   </Row>
   <Row>
    <Cell><Data ss:Type="String">YAL041W</Data><NamedCell ss:Name="Print_Area"/></Cell>
    <Cell><Data ss:Type="String">YLR229C</Data><NamedCell ss:Name="Print_Area"/></Cell>
    <Cell><Data ss:Type="String">twohybrid</Data><NamedCell ss:Name="Print_Area"/></Cell>
    <Cell><Data ss:Type="Number">11489916</Data><NamedCell ss:Name="Print_Area"/></Cell>
   </Row>
   <Row>
    <Cell><Data ss:Type="String">YAL041W</Data><NamedCell ss:Name="Print_Area"/></Cell>
    <Cell><Data ss:Type="String">YLR229C</Data><NamedCell ss:Name="Print_Area"/></Cell>
    <Cell><Data ss:Type="String">affinitycapturewestern</Data><NamedCell
      ss:Name="Print_Area"/></Cell>
    <Cell><Data ss:Type="Number">11113154</Data><NamedCell ss:Name="Print_Area"/></Cell>
   </Row>
   <Row>
    <Cell><Data ss:Type="String">YAL041W</Data><NamedCell ss:Name="Print_Area"/></Cell>
    <Cell><Data ss:Type="String">YLR229C</Data><NamedCell ss:Name="Print_Area"/></Cell>
    <Cell><Data ss:Type="String">twohybrid</Data><NamedCell ss:Name="Print_Area"/></Cell>
    <Cell><Data ss:Type="Number">9422741</Data><NamedCell ss:Name="Print_Area"/></Cell>
   </Row>
   <Row>
    <Cell><Data ss:Type="String">YAL041W</Data><NamedCell ss:Name="Print_Area"/></Cell>
    <Cell><Data ss:Type="String">YLR229C</Data><NamedCell ss:Name="Print_Area"/></Cell>
    <Cell><Data ss:Type="String">twohybrid</Data><NamedCell ss:Name="Print_Area"/></Cell>
    <Cell><Data ss:Type="Number">9428768</Data><NamedCell ss:Name="Print_Area"/></Cell>
   </Row>
   <Row>
    <Cell><Data ss:Type="String">YAL041W</Data><NamedCell ss:Name="Print_Area"/></Cell>
    <Cell><Data ss:Type="String">YLR229C</Data><NamedCell ss:Name="Print_Area"/></Cell>
    <Cell><Data ss:Type="String">affinitycapturewestern</Data><NamedCell
      ss:Name="Print_Area"/></Cell>
    <Cell><Data ss:Type="Number">7822288</Data><NamedCell ss:Name="Print_Area"/></Cell>
   </Row>
   <Row>
    <Cell><Data ss:Type="String">YAL041W</Data><NamedCell ss:Name="Print_Area"/></Cell>
    <Cell><Data ss:Type="String">YLR229C</Data><NamedCell ss:Name="Print_Area"/></Cell>
    <Cell><Data ss:Type="String">reconstitutedcomplex</Data><NamedCell
      ss:Name="Print_Area"/></Cell>
    <Cell><Data ss:Type="Number">7822288</Data><NamedCell ss:Name="Print_Area"/></Cell>
   </Row>
   <Row>
    <Cell><Data ss:Type="String">YAL041W</Data><NamedCell ss:Name="Print_Area"/></Cell>
    <Cell><Data ss:Type="String">YNL298W</Data><NamedCell ss:Name="Print_Area"/></Cell>
    <Cell><Data ss:Type="String">affinitycapturewestern</Data><NamedCell
      ss:Name="Print_Area"/></Cell>
    <Cell><Data ss:Type="Number">11113154</Data><NamedCell ss:Name="Print_Area"/></Cell>
   </Row>
   <Row>
    <Cell><Data ss:Type="String">YAL041W</Data><NamedCell ss:Name="Print_Area"/></Cell>
    <Cell><Data ss:Type="String">YNL298W</Data><NamedCell ss:Name="Print_Area"/></Cell>
    <Cell><Data ss:Type="String">biochemicalactivity</Data><NamedCell
      ss:Name="Print_Area"/></Cell>
    <Cell><Data ss:Type="Number">11113154</Data><NamedCell ss:Name="Print_Area"/></Cell>
   </Row>
   <Row>
    <Cell><Data ss:Type="String">YAL041W</Data><NamedCell ss:Name="Print_Area"/></Cell>
    <Cell><Data ss:Type="String">YNL298W</Data><NamedCell ss:Name="Print_Area"/></Cell>
    <Cell><Data ss:Type="String">unknown</Data><NamedCell ss:Name="Print_Area"/></Cell>
    <Cell><Data ss:Type="Number">11113154</Data><NamedCell ss:Name="Print_Area"/></Cell>
   </Row>
   <Row>
    <Cell><Data ss:Type="String">YAL041W</Data><NamedCell ss:Name="Print_Area"/></Cell>
    <Cell><Data ss:Type="String">YOR212W</Data><NamedCell ss:Name="Print_Area"/></Cell>
    <Cell><Data ss:Type="String">twohybrid</Data><NamedCell ss:Name="Print_Area"/></Cell>
    <Cell><Data ss:Type="Number">10087263</Data><NamedCell ss:Name="Print_Area"/></Cell>
   </Row>
   <Row>
    <Cell><Data ss:Type="String">YAL041W</Data><NamedCell ss:Name="Print_Area"/></Cell>
    <Cell><Data ss:Type="String">YOR212W</Data><NamedCell ss:Name="Print_Area"/></Cell>
    <Cell><Data ss:Type="String">reconstitutedcomplex</Data><NamedCell
      ss:Name="Print_Area"/></Cell>
    <Cell><Data ss:Type="Number">10087263</Data><NamedCell ss:Name="Print_Area"/></Cell>
   </Row>
   <Row>
    <Cell><Data ss:Type="String">YAL041W</Data><NamedCell ss:Name="Print_Area"/></Cell>
    <Cell><Data ss:Type="String">YOR212W</Data><NamedCell ss:Name="Print_Area"/></Cell>
    <Cell><Data ss:Type="String">twohybrid</Data><NamedCell ss:Name="Print_Area"/></Cell>
    <Cell><Data ss:Type="Number">9822386</Data><NamedCell ss:Name="Print_Area"/></Cell>
   </Row>
   <Row>
    <Cell><Data ss:Type="String">YAL041W</Data><NamedCell ss:Name="Print_Area"/></Cell>
    <Cell><Data ss:Type="String">YOR212W</Data><NamedCell ss:Name="Print_Area"/></Cell>
    <Cell><Data ss:Type="String">unknown</Data><NamedCell ss:Name="Print_Area"/></Cell>
    <Cell><Data ss:Type="Number">9428768</Data><NamedCell ss:Name="Print_Area"/></Cell>
   </Row>
   <Row>
    <Cell><Data ss:Type="String">YAL041W</Data><NamedCell ss:Name="Print_Area"/></Cell>
    <Cell><Data ss:Type="String">YOR212W</Data><NamedCell ss:Name="Print_Area"/></Cell>
    <Cell><Data ss:Type="String">unknown</Data><NamedCell ss:Name="Print_Area"/></Cell>
    <Cell><Data ss:Type="Number">9822386</Data><NamedCell ss:Name="Print_Area"/></Cell>
   </Row>
   <Row>
    <Cell><Data ss:Type="String">YAL041W</Data><NamedCell ss:Name="Print_Area"/></Cell>
    <Cell><Data ss:Type="String">YOR212W</Data><NamedCell ss:Name="Print_Area"/></Cell>
    <Cell><Data ss:Type="String">unknown</Data><NamedCell ss:Name="Print_Area"/></Cell>
    <Cell><Data ss:Type="Number">10087263</Data><NamedCell ss:Name="Print_Area"/></Cell>
   </Row>
   <Row>
    <Cell><Data ss:Type="String">YAL041W</Data><NamedCell ss:Name="Print_Area"/></Cell>
    <Cell><Data ss:Type="String">YOR212W</Data><NamedCell ss:Name="Print_Area"/></Cell>
    <Cell><Data ss:Type="String">unknown</Data><NamedCell ss:Name="Print_Area"/></Cell>
    <Cell><Data ss:Type="Number">7565673</Data><NamedCell ss:Name="Print_Area"/></Cell>
   </Row>
   <Row>
    <Cell><Data ss:Type="String">YAL041W</Data><NamedCell ss:Name="Print_Area"/></Cell>
    <Cell><Data ss:Type="String">YOR212W</Data><NamedCell ss:Name="Print_Area"/></Cell>
    <Cell><Data ss:Type="String">twohybrid</Data><NamedCell ss:Name="Print_Area"/></Cell>
    <Cell><Data ss:Type="Number">7565673</Data><NamedCell ss:Name="Print_Area"/></Cell>
   </Row>
   <Row>
    <Cell><Data ss:Type="String">YAL041W</Data><NamedCell ss:Name="Print_Area"/></Cell>
    <Cell><Data ss:Type="String">YOR212W</Data><NamedCell ss:Name="Print_Area"/></Cell>
    <Cell><Data ss:Type="String">twohybrid</Data><NamedCell ss:Name="Print_Area"/></Cell>
    <Cell><Data ss:Type="Number">9428768</Data><NamedCell ss:Name="Print_Area"/></Cell>
   </Row>
   <Row>
    <Cell><Data ss:Type="String">YAL041W</Data><NamedCell ss:Name="Print_Area"/></Cell>
    <Cell><Data ss:Type="String">YOR212W</Data><NamedCell ss:Name="Print_Area"/></Cell>
    <Cell><Data ss:Type="String">reconstitutedcomplex</Data><NamedCell
      ss:Name="Print_Area"/></Cell>
    <Cell><Data ss:Type="Number">9428768</Data><NamedCell ss:Name="Print_Area"/></Cell>
   </Row>
   <Row>
    <Cell><Data ss:Type="String">YAL042W</Data><NamedCell ss:Name="Print_Area"/></Cell>
    <Cell><Data ss:Type="String">YML067C</Data><NamedCell ss:Name="Print_Area"/></Cell>
    <Cell><Data ss:Type="String">unknown</Data><NamedCell ss:Name="Print_Area"/></Cell>
    <Cell><Data ss:Type="Number">11157978</Data><NamedCell ss:Name="Print_Area"/></Cell>
   </Row>
   <Row>
    <Cell><Data ss:Type="String">YAL042W</Data><NamedCell ss:Name="Print_Area"/></Cell>
    <Cell><Data ss:Type="String">YML067C</Data><NamedCell ss:Name="Print_Area"/></Cell>
    <Cell><Data ss:Type="String">affinitycapturewestern</Data><NamedCell
      ss:Name="Print_Area"/></Cell>
    <Cell><Data ss:Type="Number">11157978</Data><NamedCell ss:Name="Print_Area"/></Cell>
   </Row>
   <Row>
    <Cell><Data ss:Type="String">YAL043C</Data><NamedCell ss:Name="Print_Area"/></Cell>
    <Cell><Data ss:Type="String">YDR195W</Data><NamedCell ss:Name="Print_Area"/></Cell>
    <Cell><Data ss:Type="String">affinitycapturems</Data><NamedCell
      ss:Name="Print_Area"/></Cell>
    <Cell><Data ss:Type="Number">11841235</Data><NamedCell ss:Name="Print_Area"/></Cell>
   </Row>
   <Row>
    <Cell><Data ss:Type="String">YAL043C</Data><NamedCell ss:Name="Print_Area"/></Cell>
    <Cell><Data ss:Type="String">YDR195W</Data><NamedCell ss:Name="Print_Area"/></Cell>
    <Cell><Data ss:Type="String">affinitycapturems</Data><NamedCell
      ss:Name="Print_Area"/></Cell>
    <Cell><Data ss:Type="Number">14759368</Data><NamedCell ss:Name="Print_Area"/></Cell>
   </Row>
   <Row>
    <Cell><Data ss:Type="String">YAL043C</Data><NamedCell ss:Name="Print_Area"/></Cell>
    <Cell><Data ss:Type="String">YDR195W</Data><NamedCell ss:Name="Print_Area"/></Cell>
    <Cell><Data ss:Type="String">affinitycapturems</Data><NamedCell
      ss:Name="Print_Area"/></Cell>
    <Cell><Data ss:Type="Number">11805826</Data><NamedCell ss:Name="Print_Area"/></Cell>
   </Row>
   <Row>
    <Cell><Data ss:Type="String">YAL043C</Data><NamedCell ss:Name="Print_Area"/></Cell>
    <Cell><Data ss:Type="String">YDR195W</Data><NamedCell ss:Name="Print_Area"/></Cell>
    <Cell><Data ss:Type="String">affinitycapturems</Data><NamedCell
      ss:Name="Print_Area"/></Cell>
    <Cell><Data ss:Type="Number">12704082</Data><NamedCell ss:Name="Print_Area"/></Cell>
   </Row>
   <Row>
    <Cell><Data ss:Type="String">YAL043C</Data><NamedCell ss:Name="Print_Area"/></Cell>
    <Cell><Data ss:Type="String">YDR195W</Data><NamedCell ss:Name="Print_Area"/></Cell>
    <Cell><Data ss:Type="String">affinitycapturems</Data><NamedCell
      ss:Name="Print_Area"/></Cell>
    <Cell><Data ss:Type="Number">16429126</Data><NamedCell ss:Name="Print_Area"/></Cell>
   </Row>
   <Row>
    <Cell><Data ss:Type="String">YAL043C</Data><NamedCell ss:Name="Print_Area"/></Cell>
    <Cell><Data ss:Type="String">YDR195W</Data><NamedCell ss:Name="Print_Area"/></Cell>
    <Cell><Data ss:Type="String">affinitycapturems</Data><NamedCell
      ss:Name="Print_Area"/></Cell>
    <Cell><Data ss:Type="Number">12819204</Data><NamedCell ss:Name="Print_Area"/></Cell>
   </Row>
   <Row>
    <Cell><Data ss:Type="String">YAL043C</Data><NamedCell ss:Name="Print_Area"/></Cell>
    <Cell><Data ss:Type="String">YDR228C</Data><NamedCell ss:Name="Print_Area"/></Cell>
    <Cell><Data ss:Type="String">reconstitutedcomplex</Data><NamedCell
      ss:Name="Print_Area"/></Cell>
    <Cell><Data ss:Type="Number">12853609</Data><NamedCell ss:Name="Print_Area"/></Cell>
   </Row>
   <Row>
    <Cell><Data ss:Type="String">YAL043C</Data><NamedCell ss:Name="Print_Area"/></Cell>
    <Cell><Data ss:Type="String">YDR228C</Data><NamedCell ss:Name="Print_Area"/></Cell>
    <Cell><Data ss:Type="String">affinitycapturems</Data><NamedCell
      ss:Name="Print_Area"/></Cell>
    <Cell><Data ss:Type="Number">15565157</Data><NamedCell ss:Name="Print_Area"/></Cell>
   </Row>
   <Row>
    <Cell><Data ss:Type="String">YAL043C</Data><NamedCell ss:Name="Print_Area"/></Cell>
    <Cell><Data ss:Type="String">YDR301W</Data><NamedCell ss:Name="Print_Area"/></Cell>
    <Cell><Data ss:Type="String">affinitycapturems</Data><NamedCell
      ss:Name="Print_Area"/></Cell>
    <Cell><Data ss:Type="Number">11805826</Data><NamedCell ss:Name="Print_Area"/></Cell>
   </Row>
   <Row>
    <Cell><Data ss:Type="String">YAL043C</Data><NamedCell ss:Name="Print_Area"/></Cell>
    <Cell><Data ss:Type="String">YDR301W</Data><NamedCell ss:Name="Print_Area"/></Cell>
    <Cell><Data ss:Type="String">affinitycapturems</Data><NamedCell
      ss:Name="Print_Area"/></Cell>
    <Cell><Data ss:Type="Number">14759368</Data><NamedCell ss:Name="Print_Area"/></Cell>
   </Row>
   <Row>
    <Cell><Data ss:Type="String">YAL043C</Data><NamedCell ss:Name="Print_Area"/></Cell>
    <Cell><Data ss:Type="String">YDR301W</Data><NamedCell ss:Name="Print_Area"/></Cell>
    <Cell><Data ss:Type="String">affinitycapturems</Data><NamedCell
      ss:Name="Print_Area"/></Cell>
    <Cell><Data ss:Type="Number">11841235</Data><NamedCell ss:Name="Print_Area"/></Cell>
   </Row>
   <Row>
    <Cell><Data ss:Type="String">YAL043C</Data><NamedCell ss:Name="Print_Area"/></Cell>
    <Cell><Data ss:Type="String">YDR301W</Data><NamedCell ss:Name="Print_Area"/></Cell>
    <Cell><Data ss:Type="String">affinitycapturewestern</Data><NamedCell
      ss:Name="Print_Area"/></Cell>
    <Cell><Data ss:Type="Number">10523662</Data><NamedCell ss:Name="Print_Area"/></Cell>
   </Row>
   <Row>
    <Cell><Data ss:Type="String">YAL043C</Data><NamedCell ss:Name="Print_Area"/></Cell>
    <Cell><Data ss:Type="String">YDR301W</Data><NamedCell ss:Name="Print_Area"/></Cell>
    <Cell><Data ss:Type="String">affinitycapturems</Data><NamedCell
      ss:Name="Print_Area"/></Cell>
    <Cell><Data ss:Type="Number">16429126</Data><NamedCell ss:Name="Print_Area"/></Cell>
   </Row>
   <Row>
    <Cell><Data ss:Type="String">YAL043C</Data><NamedCell ss:Name="Print_Area"/></Cell>
    <Cell><Data ss:Type="String">YDR301W</Data><NamedCell ss:Name="Print_Area"/></Cell>
    <Cell><Data ss:Type="String">unknown</Data><NamedCell ss:Name="Print_Area"/></Cell>
    <Cell><Data ss:Type="Number">10523662</Data><NamedCell ss:Name="Print_Area"/></Cell>
   </Row>
   <Row>
    <Cell><Data ss:Type="String">YAL043C</Data><NamedCell ss:Name="Print_Area"/></Cell>
    <Cell><Data ss:Type="String">YER133W</Data><NamedCell ss:Name="Print_Area"/></Cell>
    <Cell><Data ss:Type="String">affinitycapturems</Data><NamedCell
      ss:Name="Print_Area"/></Cell>
    <Cell><Data ss:Type="Number">16429126</Data><NamedCell ss:Name="Print_Area"/></Cell>
   </Row>
   <Row>
    <Cell><Data ss:Type="String">YAL043C</Data><NamedCell ss:Name="Print_Area"/></Cell>
    <Cell><Data ss:Type="String">YER133W</Data><NamedCell ss:Name="Print_Area"/></Cell>
    <Cell><Data ss:Type="String">affinitycapturems</Data><NamedCell
      ss:Name="Print_Area"/></Cell>
    <Cell><Data ss:Type="Number">11805826</Data><NamedCell ss:Name="Print_Area"/></Cell>
   </Row>
   <Row>
    <Cell><Data ss:Type="String">YAL043C</Data><NamedCell ss:Name="Print_Area"/></Cell>
    <Cell><Data ss:Type="String">YER133W</Data><NamedCell ss:Name="Print_Area"/></Cell>
    <Cell><Data ss:Type="String">affinitycapturems</Data><NamedCell
      ss:Name="Print_Area"/></Cell>
    <Cell><Data ss:Type="Number">12704082</Data><NamedCell ss:Name="Print_Area"/></Cell>
   </Row>
   <Row>
    <Cell><Data ss:Type="String">YAL043C</Data><NamedCell ss:Name="Print_Area"/></Cell>
    <Cell><Data ss:Type="String">YER133W</Data><NamedCell ss:Name="Print_Area"/></Cell>
    <Cell><Data ss:Type="String">affinitycapturems</Data><NamedCell
      ss:Name="Print_Area"/></Cell>
    <Cell><Data ss:Type="Number">14759368</Data><NamedCell ss:Name="Print_Area"/></Cell>
   </Row>
   <Row>
    <Cell><Data ss:Type="String">YAL043C</Data><NamedCell ss:Name="Print_Area"/></Cell>
    <Cell><Data ss:Type="String">YER133W</Data><NamedCell ss:Name="Print_Area"/></Cell>
    <Cell><Data ss:Type="String">biochemicalactivity</Data><NamedCell
      ss:Name="Print_Area"/></Cell>
    <Cell><Data ss:Type="Number">16137619</Data><NamedCell ss:Name="Print_Area"/></Cell>
   </Row>
   <Row>
    <Cell><Data ss:Type="String">YAL043C</Data><NamedCell ss:Name="Print_Area"/></Cell>
    <Cell><Data ss:Type="String">YER133W</Data><NamedCell ss:Name="Print_Area"/></Cell>
    <Cell><Data ss:Type="String">affinitycapturems</Data><NamedCell
      ss:Name="Print_Area"/></Cell>
    <Cell><Data ss:Type="Number">12819204</Data><NamedCell ss:Name="Print_Area"/></Cell>
   </Row>
   <Row>
    <Cell><Data ss:Type="String">YAL043C</Data><NamedCell ss:Name="Print_Area"/></Cell>
    <Cell><Data ss:Type="String">YER133W</Data><NamedCell ss:Name="Print_Area"/></Cell>
    <Cell><Data ss:Type="String">affinitycapturems</Data><NamedCell
      ss:Name="Print_Area"/></Cell>
    <Cell><Data ss:Type="Number">16554755</Data><NamedCell ss:Name="Print_Area"/></Cell>
   </Row>
   <Row>
    <Cell><Data ss:Type="String">YAL043C</Data><NamedCell ss:Name="Print_Area"/></Cell>
    <Cell><Data ss:Type="String">YER133W</Data><NamedCell ss:Name="Print_Area"/></Cell>
    <Cell><Data ss:Type="String">affinitycapturems</Data><NamedCell
      ss:Name="Print_Area"/></Cell>
    <Cell><Data ss:Type="Number">11841235</Data><NamedCell ss:Name="Print_Area"/></Cell>
   </Row>
   <Row>
    <Cell><Data ss:Type="String">YAL043C</Data><NamedCell ss:Name="Print_Area"/></Cell>
    <Cell><Data ss:Type="String">YER133W</Data><NamedCell ss:Name="Print_Area"/></Cell>
    <Cell><Data ss:Type="String">reconstitutedcomplex</Data><NamedCell
      ss:Name="Print_Area"/></Cell>
    <Cell><Data ss:Type="Number">16137619</Data><NamedCell ss:Name="Print_Area"/></Cell>
   </Row>
   <Row>
    <Cell><Data ss:Type="String">YAL043C</Data><NamedCell ss:Name="Print_Area"/></Cell>
    <Cell><Data ss:Type="String">YGR156W</Data><NamedCell ss:Name="Print_Area"/></Cell>
    <Cell><Data ss:Type="String">farwestern</Data><NamedCell ss:Name="Print_Area"/></Cell>
    <Cell><Data ss:Type="Number">12504017</Data><NamedCell ss:Name="Print_Area"/></Cell>
   </Row>
   <Row>
    <Cell><Data ss:Type="String">YAL043C</Data><NamedCell ss:Name="Print_Area"/></Cell>
    <Cell><Data ss:Type="String">YGR156W</Data><NamedCell ss:Name="Print_Area"/></Cell>
    <Cell><Data ss:Type="String">affinitycapturems</Data><NamedCell
      ss:Name="Print_Area"/></Cell>
    <Cell><Data ss:Type="Number">11805826</Data><NamedCell ss:Name="Print_Area"/></Cell>
   </Row>
   <Row>
    <Cell><Data ss:Type="String">YAL043C</Data><NamedCell ss:Name="Print_Area"/></Cell>
    <Cell><Data ss:Type="String">YGR156W</Data><NamedCell ss:Name="Print_Area"/></Cell>
    <Cell><Data ss:Type="String">affinitycapturems</Data><NamedCell
      ss:Name="Print_Area"/></Cell>
    <Cell><Data ss:Type="Number">12704082</Data><NamedCell ss:Name="Print_Area"/></Cell>
   </Row>
   <Row>
    <Cell><Data ss:Type="String">YAL043C</Data><NamedCell ss:Name="Print_Area"/></Cell>
    <Cell><Data ss:Type="String">YGR156W</Data><NamedCell ss:Name="Print_Area"/></Cell>
    <Cell><Data ss:Type="String">affinitycapturewestern</Data><NamedCell
      ss:Name="Print_Area"/></Cell>
    <Cell><Data ss:Type="Number">12504017</Data><NamedCell ss:Name="Print_Area"/></Cell>
   </Row>
   <Row>
    <Cell><Data ss:Type="String">YAL043C</Data><NamedCell ss:Name="Print_Area"/></Cell>
    <Cell><Data ss:Type="String">YGR156W</Data><NamedCell ss:Name="Print_Area"/></Cell>
    <Cell><Data ss:Type="String">affinitycapturems</Data><NamedCell
      ss:Name="Print_Area"/></Cell>
    <Cell><Data ss:Type="Number">12819204</Data><NamedCell ss:Name="Print_Area"/></Cell>
   </Row>
   <Row>
    <Cell><Data ss:Type="String">YAL043C</Data><NamedCell ss:Name="Print_Area"/></Cell>
    <Cell><Data ss:Type="String">YGR156W</Data><NamedCell ss:Name="Print_Area"/></Cell>
    <Cell><Data ss:Type="String">affinitycapturems</Data><NamedCell
      ss:Name="Print_Area"/></Cell>
    <Cell><Data ss:Type="Number">16429126</Data><NamedCell ss:Name="Print_Area"/></Cell>
   </Row>
   <Row>
    <Cell><Data ss:Type="String">YAL043C</Data><NamedCell ss:Name="Print_Area"/></Cell>
    <Cell><Data ss:Type="String">YGR156W</Data><NamedCell ss:Name="Print_Area"/></Cell>
    <Cell><Data ss:Type="String">affinitycapturems</Data><NamedCell
      ss:Name="Print_Area"/></Cell>
    <Cell><Data ss:Type="Number">16554755</Data><NamedCell ss:Name="Print_Area"/></Cell>
   </Row>
   <Row>
    <Cell><Data ss:Type="String">YAL043C</Data><NamedCell ss:Name="Print_Area"/></Cell>
    <Cell><Data ss:Type="String">YJR093C</Data><NamedCell ss:Name="Print_Area"/></Cell>
    <Cell><Data ss:Type="String">affinitycapturems</Data><NamedCell
      ss:Name="Print_Area"/></Cell>
    <Cell><Data ss:Type="Number">12704082</Data><NamedCell ss:Name="Print_Area"/></Cell>
   </Row>
   <Row>
    <Cell><Data ss:Type="String">YAL043C</Data><NamedCell ss:Name="Print_Area"/></Cell>
    <Cell><Data ss:Type="String">YJR093C</Data><NamedCell ss:Name="Print_Area"/></Cell>
    <Cell><Data ss:Type="String">affinitycapturems</Data><NamedCell
      ss:Name="Print_Area"/></Cell>
    <Cell><Data ss:Type="Number">12819204</Data><NamedCell ss:Name="Print_Area"/></Cell>
   </Row>
   <Row>
    <Cell><Data ss:Type="String">YAL043C</Data><NamedCell ss:Name="Print_Area"/></Cell>
    <Cell><Data ss:Type="String">YJR093C</Data><NamedCell ss:Name="Print_Area"/></Cell>
    <Cell><Data ss:Type="String">affinitycapturems</Data><NamedCell
      ss:Name="Print_Area"/></Cell>
    <Cell><Data ss:Type="Number">16429126</Data><NamedCell ss:Name="Print_Area"/></Cell>
   </Row>
   <Row>
    <Cell><Data ss:Type="String">YAL043C</Data><NamedCell ss:Name="Print_Area"/></Cell>
    <Cell><Data ss:Type="String">YJR093C</Data><NamedCell ss:Name="Print_Area"/></Cell>
    <Cell><Data ss:Type="String">affinitycapturems</Data><NamedCell
      ss:Name="Print_Area"/></Cell>
    <Cell><Data ss:Type="Number">11805826</Data><NamedCell ss:Name="Print_Area"/></Cell>
   </Row>
   <Row>
    <Cell><Data ss:Type="String">YAL043C</Data><NamedCell ss:Name="Print_Area"/></Cell>
    <Cell><Data ss:Type="String">YJR093C</Data><NamedCell ss:Name="Print_Area"/></Cell>
    <Cell><Data ss:Type="String">unknown</Data><NamedCell ss:Name="Print_Area"/></Cell>
    <Cell><Data ss:Type="Number">10523662</Data><NamedCell ss:Name="Print_Area"/></Cell>
   </Row>
   <Row>
    <Cell><Data ss:Type="String">YAL043C</Data><NamedCell ss:Name="Print_Area"/></Cell>
    <Cell><Data ss:Type="String">YJR093C</Data><NamedCell ss:Name="Print_Area"/></Cell>
    <Cell><Data ss:Type="String">affinitycapturewestern</Data><NamedCell
      ss:Name="Print_Area"/></Cell>
    <Cell><Data ss:Type="Number">10523662</Data><NamedCell ss:Name="Print_Area"/></Cell>
   </Row>
   <Row>
    <Cell><Data ss:Type="String">YAL043C</Data><NamedCell ss:Name="Print_Area"/></Cell>
    <Cell><Data ss:Type="String">YKL018W</Data><NamedCell ss:Name="Print_Area"/></Cell>
    <Cell><Data ss:Type="String">affinitycapturems</Data><NamedCell
      ss:Name="Print_Area"/></Cell>
    <Cell><Data ss:Type="Number">16429126</Data><NamedCell ss:Name="Print_Area"/></Cell>
   </Row>
   <Row>
    <Cell><Data ss:Type="String">YAL043C</Data><NamedCell ss:Name="Print_Area"/></Cell>
    <Cell><Data ss:Type="String">YKL018W</Data><NamedCell ss:Name="Print_Area"/></Cell>
    <Cell><Data ss:Type="String">affinitycapturems</Data><NamedCell
      ss:Name="Print_Area"/></Cell>
    <Cell><Data ss:Type="Number">11742990</Data><NamedCell ss:Name="Print_Area"/></Cell>
   </Row>
   <Row>
    <Cell><Data ss:Type="String">YAL043C</Data><NamedCell ss:Name="Print_Area"/></Cell>
    <Cell><Data ss:Type="String">YKL018W</Data><NamedCell ss:Name="Print_Area"/></Cell>
    <Cell><Data ss:Type="String">affinitycapturems</Data><NamedCell
      ss:Name="Print_Area"/></Cell>
    <Cell><Data ss:Type="Number">12819204</Data><NamedCell ss:Name="Print_Area"/></Cell>
   </Row>
   <Row>
    <Cell><Data ss:Type="String">YAL043C</Data><NamedCell ss:Name="Print_Area"/></Cell>
    <Cell><Data ss:Type="String">YKL018W</Data><NamedCell ss:Name="Print_Area"/></Cell>
    <Cell><Data ss:Type="String">affinitycapturems</Data><NamedCell
      ss:Name="Print_Area"/></Cell>
    <Cell><Data ss:Type="Number">11841235</Data><NamedCell ss:Name="Print_Area"/></Cell>
   </Row>
   <Row>
    <Cell><Data ss:Type="String">YAL043C</Data><NamedCell ss:Name="Print_Area"/></Cell>
    <Cell><Data ss:Type="String">YKL018W</Data><NamedCell ss:Name="Print_Area"/></Cell>
    <Cell><Data ss:Type="String">affinitycapturewestern</Data><NamedCell
      ss:Name="Print_Area"/></Cell>
    <Cell><Data ss:Type="Number">11742990</Data><NamedCell ss:Name="Print_Area"/></Cell>
   </Row>
   <Row>
    <Cell><Data ss:Type="String">YAL043C</Data><NamedCell ss:Name="Print_Area"/></Cell>
    <Cell><Data ss:Type="String">YKL059C</Data><NamedCell ss:Name="Print_Area"/></Cell>
    <Cell><Data ss:Type="String">affinitycapturems</Data><NamedCell
      ss:Name="Print_Area"/></Cell>
    <Cell><Data ss:Type="Number">11841235</Data><NamedCell ss:Name="Print_Area"/></Cell>
   </Row>
   <Row>
    <Cell><Data ss:Type="String">YAL043C</Data><NamedCell ss:Name="Print_Area"/></Cell>
    <Cell><Data ss:Type="String">YKL059C</Data><NamedCell ss:Name="Print_Area"/></Cell>
    <Cell><Data ss:Type="String">affinitycapturems</Data><NamedCell
      ss:Name="Print_Area"/></Cell>
    <Cell><Data ss:Type="Number">16429126</Data><NamedCell ss:Name="Print_Area"/></Cell>
   </Row>
   <Row>
    <Cell><Data ss:Type="String">YAL043C</Data><NamedCell ss:Name="Print_Area"/></Cell>
    <Cell><Data ss:Type="String">YKL059C</Data><NamedCell ss:Name="Print_Area"/></Cell>
    <Cell><Data ss:Type="String">affinitycapturems</Data><NamedCell
      ss:Name="Print_Area"/></Cell>
    <Cell><Data ss:Type="Number">12704082</Data><NamedCell ss:Name="Print_Area"/></Cell>
   </Row>
   <Row>
    <Cell><Data ss:Type="String">YAL043C</Data><NamedCell ss:Name="Print_Area"/></Cell>
    <Cell><Data ss:Type="String">YKL059C</Data><NamedCell ss:Name="Print_Area"/></Cell>
    <Cell><Data ss:Type="String">affinitycapturems</Data><NamedCell
      ss:Name="Print_Area"/></Cell>
    <Cell><Data ss:Type="Number">11805826</Data><NamedCell ss:Name="Print_Area"/></Cell>
   </Row>
   <Row>
    <Cell><Data ss:Type="String">YAL043C</Data><NamedCell ss:Name="Print_Area"/></Cell>
    <Cell><Data ss:Type="String">YKL059C</Data><NamedCell ss:Name="Print_Area"/></Cell>
    <Cell><Data ss:Type="String">affinitycapturems</Data><NamedCell
      ss:Name="Print_Area"/></Cell>
    <Cell><Data ss:Type="Number">14759368</Data><NamedCell ss:Name="Print_Area"/></Cell>
   </Row>
   <Row>
    <Cell><Data ss:Type="String">YAL043C</Data><NamedCell ss:Name="Print_Area"/></Cell>
    <Cell><Data ss:Type="String">YKL059C</Data><NamedCell ss:Name="Print_Area"/></Cell>
    <Cell><Data ss:Type="String">affinitycapturems</Data><NamedCell
      ss:Name="Print_Area"/></Cell>
    <Cell><Data ss:Type="Number">11713271</Data><NamedCell ss:Name="Print_Area"/></Cell>
   </Row>
   <Row>
    <Cell><Data ss:Type="String">YAL043C</Data><NamedCell ss:Name="Print_Area"/></Cell>
    <Cell><Data ss:Type="String">YKL059C</Data><NamedCell ss:Name="Print_Area"/></Cell>
    <Cell><Data ss:Type="String">affinitycapturewestern</Data><NamedCell
      ss:Name="Print_Area"/></Cell>
    <Cell><Data ss:Type="Number">11713271</Data><NamedCell ss:Name="Print_Area"/></Cell>
   </Row>
   <Row>
    <Cell><Data ss:Type="String">YAL043C</Data><NamedCell ss:Name="Print_Area"/></Cell>
    <Cell><Data ss:Type="String">YKL059C</Data><NamedCell ss:Name="Print_Area"/></Cell>
    <Cell><Data ss:Type="String">affinitycapturems</Data><NamedCell
      ss:Name="Print_Area"/></Cell>
    <Cell><Data ss:Type="Number">12819204</Data><NamedCell ss:Name="Print_Area"/></Cell>
   </Row>
   <Row>
    <Cell><Data ss:Type="String">YAL043C</Data><NamedCell ss:Name="Print_Area"/></Cell>
    <Cell><Data ss:Type="String">YKR002W</Data><NamedCell ss:Name="Print_Area"/></Cell>
    <Cell><Data ss:Type="String">affinitycapturems</Data><NamedCell
      ss:Name="Print_Area"/></Cell>
    <Cell><Data ss:Type="Number">14759368</Data><NamedCell ss:Name="Print_Area"/></Cell>
   </Row>
   <Row>
    <Cell><Data ss:Type="String">YAL043C</Data><NamedCell ss:Name="Print_Area"/></Cell>
    <Cell><Data ss:Type="String">YKR002W</Data><NamedCell ss:Name="Print_Area"/></Cell>
    <Cell><Data ss:Type="String">unknown</Data><NamedCell ss:Name="Print_Area"/></Cell>
    <Cell><Data ss:Type="Number">10523662</Data><NamedCell ss:Name="Print_Area"/></Cell>
   </Row>
   <Row>
    <Cell><Data ss:Type="String">YAL043C</Data><NamedCell ss:Name="Print_Area"/></Cell>
    <Cell><Data ss:Type="String">YKR002W</Data><NamedCell ss:Name="Print_Area"/></Cell>
    <Cell><Data ss:Type="String">affinitycapturems</Data><NamedCell
      ss:Name="Print_Area"/></Cell>
    <Cell><Data ss:Type="Number">11805826</Data><NamedCell ss:Name="Print_Area"/></Cell>
   </Row>
   <Row>
    <Cell><Data ss:Type="String">YAL043C</Data><NamedCell ss:Name="Print_Area"/></Cell>
    <Cell><Data ss:Type="String">YKR002W</Data><NamedCell ss:Name="Print_Area"/></Cell>
    <Cell><Data ss:Type="String">affinitycapturems</Data><NamedCell
      ss:Name="Print_Area"/></Cell>
    <Cell><Data ss:Type="Number">12819204</Data><NamedCell ss:Name="Print_Area"/></Cell>
   </Row>
   <Row>
    <Cell><Data ss:Type="String">YAL043C</Data><NamedCell ss:Name="Print_Area"/></Cell>
    <Cell><Data ss:Type="String">YKR002W</Data><NamedCell ss:Name="Print_Area"/></Cell>
    <Cell><Data ss:Type="String">affinitycapturems</Data><NamedCell
      ss:Name="Print_Area"/></Cell>
    <Cell><Data ss:Type="Number">11841235</Data><NamedCell ss:Name="Print_Area"/></Cell>
   </Row>
   <Row>
    <Cell><Data ss:Type="String">YAL043C</Data><NamedCell ss:Name="Print_Area"/></Cell>
    <Cell><Data ss:Type="String">YKR002W</Data><NamedCell ss:Name="Print_Area"/></Cell>
    <Cell><Data ss:Type="String">affinitycapturewestern</Data><NamedCell
      ss:Name="Print_Area"/></Cell>
    <Cell><Data ss:Type="Number">10523662</Data><NamedCell ss:Name="Print_Area"/></Cell>
   </Row>
   <Row>
    <Cell><Data ss:Type="String">YAL043C</Data><NamedCell ss:Name="Print_Area"/></Cell>
    <Cell><Data ss:Type="String">YKR002W</Data><NamedCell ss:Name="Print_Area"/></Cell>
    <Cell><Data ss:Type="String">affinitycapturems</Data><NamedCell
      ss:Name="Print_Area"/></Cell>
    <Cell><Data ss:Type="Number">12704082</Data><NamedCell ss:Name="Print_Area"/></Cell>
   </Row>
   <Row>
    <Cell><Data ss:Type="String">YAL043C</Data><NamedCell ss:Name="Print_Area"/></Cell>
    <Cell><Data ss:Type="String">YLR115W</Data><NamedCell ss:Name="Print_Area"/></Cell>
    <Cell><Data ss:Type="String">unknown</Data><NamedCell ss:Name="Print_Area"/></Cell>
    <Cell><Data ss:Type="Number">10523662</Data><NamedCell ss:Name="Print_Area"/></Cell>
   </Row>
   <Row>
    <Cell><Data ss:Type="String">YAL043C</Data><NamedCell ss:Name="Print_Area"/></Cell>
    <Cell><Data ss:Type="String">YLR115W</Data><NamedCell ss:Name="Print_Area"/></Cell>
    <Cell><Data ss:Type="String">affinitycapturems</Data><NamedCell
      ss:Name="Print_Area"/></Cell>
    <Cell><Data ss:Type="Number">12704082</Data><NamedCell ss:Name="Print_Area"/></Cell>
   </Row>
   <Row>
    <Cell><Data ss:Type="String">YAL043C</Data><NamedCell ss:Name="Print_Area"/></Cell>
    <Cell><Data ss:Type="String">YLR115W</Data><NamedCell ss:Name="Print_Area"/></Cell>
    <Cell><Data ss:Type="String">affinitycapturems</Data><NamedCell
      ss:Name="Print_Area"/></Cell>
    <Cell><Data ss:Type="Number">16429126</Data><NamedCell ss:Name="Print_Area"/></Cell>
   </Row>
   <Row>
    <Cell><Data ss:Type="String">YAL043C</Data><NamedCell ss:Name="Print_Area"/></Cell>
    <Cell><Data ss:Type="String">YLR115W</Data><NamedCell ss:Name="Print_Area"/></Cell>
    <Cell><Data ss:Type="String">reconstitutedcomplex</Data><NamedCell
      ss:Name="Print_Area"/></Cell>
    <Cell><Data ss:Type="Number">12853609</Data><NamedCell ss:Name="Print_Area"/></Cell>
   </Row>
   <Row>
    <Cell><Data ss:Type="String">YAL043C</Data><NamedCell ss:Name="Print_Area"/></Cell>
    <Cell><Data ss:Type="String">YLR115W</Data><NamedCell ss:Name="Print_Area"/></Cell>
    <Cell><Data ss:Type="String">affinitycapturems</Data><NamedCell
      ss:Name="Print_Area"/></Cell>
    <Cell><Data ss:Type="Number">11805826</Data><NamedCell ss:Name="Print_Area"/></Cell>
   </Row>
   <Row>
    <Cell><Data ss:Type="String">YAL043C</Data><NamedCell ss:Name="Print_Area"/></Cell>
    <Cell><Data ss:Type="String">YLR115W</Data><NamedCell ss:Name="Print_Area"/></Cell>
    <Cell><Data ss:Type="String">copurification</Data><NamedCell
      ss:Name="Print_Area"/></Cell>
    <Cell><Data ss:Type="Number">9303317</Data><NamedCell ss:Name="Print_Area"/></Cell>
   </Row>
   <Row>
    <Cell><Data ss:Type="String">YAL043C</Data><NamedCell ss:Name="Print_Area"/></Cell>
    <Cell><Data ss:Type="String">YLR115W</Data><NamedCell ss:Name="Print_Area"/></Cell>
    <Cell><Data ss:Type="String">affinitycapturems</Data><NamedCell
      ss:Name="Print_Area"/></Cell>
    <Cell><Data ss:Type="Number">12819204</Data><NamedCell ss:Name="Print_Area"/></Cell>
   </Row>
   <Row>
    <Cell><Data ss:Type="String">YAL043C</Data><NamedCell ss:Name="Print_Area"/></Cell>
    <Cell><Data ss:Type="String">YLR115W</Data><NamedCell ss:Name="Print_Area"/></Cell>
    <Cell><Data ss:Type="String">affinitycapturems</Data><NamedCell
      ss:Name="Print_Area"/></Cell>
    <Cell><Data ss:Type="Number">11841235</Data><NamedCell ss:Name="Print_Area"/></Cell>
   </Row>
   <Row>
    <Cell><Data ss:Type="String">YAL043C</Data><NamedCell ss:Name="Print_Area"/></Cell>
    <Cell><Data ss:Type="String">YLR277C</Data><NamedCell ss:Name="Print_Area"/></Cell>
    <Cell><Data ss:Type="String">affinitycapturems</Data><NamedCell
      ss:Name="Print_Area"/></Cell>
    <Cell><Data ss:Type="Number">16554755</Data><NamedCell ss:Name="Print_Area"/></Cell>
   </Row>
   <Row>
    <Cell><Data ss:Type="String">YAL043C</Data><NamedCell ss:Name="Print_Area"/></Cell>
    <Cell><Data ss:Type="String">YLR277C</Data><NamedCell ss:Name="Print_Area"/></Cell>
    <Cell><Data ss:Type="String">unknown</Data><NamedCell ss:Name="Print_Area"/></Cell>
    <Cell><Data ss:Type="Number">10523662</Data><NamedCell ss:Name="Print_Area"/></Cell>
   </Row>
   <Row>
    <Cell><Data ss:Type="String">YAL043C</Data><NamedCell ss:Name="Print_Area"/></Cell>
    <Cell><Data ss:Type="String">YLR277C</Data><NamedCell ss:Name="Print_Area"/></Cell>
    <Cell><Data ss:Type="String">affinitycapturems</Data><NamedCell
      ss:Name="Print_Area"/></Cell>
    <Cell><Data ss:Type="Number">14759368</Data><NamedCell ss:Name="Print_Area"/></Cell>
   </Row>
   <Row>
    <Cell><Data ss:Type="String">YAL043C</Data><NamedCell ss:Name="Print_Area"/></Cell>
    <Cell><Data ss:Type="String">YLR277C</Data><NamedCell ss:Name="Print_Area"/></Cell>
    <Cell><Data ss:Type="String">affinitycapturems</Data><NamedCell
      ss:Name="Print_Area"/></Cell>
    <Cell><Data ss:Type="Number">11805826</Data><NamedCell ss:Name="Print_Area"/></Cell>
   </Row>
   <Row>
    <Cell><Data ss:Type="String">YAL043C</Data><NamedCell ss:Name="Print_Area"/></Cell>
    <Cell><Data ss:Type="String">YLR277C</Data><NamedCell ss:Name="Print_Area"/></Cell>
    <Cell><Data ss:Type="String">affinitycapturems</Data><NamedCell
      ss:Name="Print_Area"/></Cell>
    <Cell><Data ss:Type="Number">12704082</Data><NamedCell ss:Name="Print_Area"/></Cell>
   </Row>
   <Row>
    <Cell><Data ss:Type="String">YAL043C</Data><NamedCell ss:Name="Print_Area"/></Cell>
    <Cell><Data ss:Type="String">YLR277C</Data><NamedCell ss:Name="Print_Area"/></Cell>
    <Cell><Data ss:Type="String">affinitycapturems</Data><NamedCell
      ss:Name="Print_Area"/></Cell>
    <Cell><Data ss:Type="Number">16429126</Data><NamedCell ss:Name="Print_Area"/></Cell>
   </Row>
   <Row>
    <Cell><Data ss:Type="String">YAL043C</Data><NamedCell ss:Name="Print_Area"/></Cell>
    <Cell><Data ss:Type="String">YLR277C</Data><NamedCell ss:Name="Print_Area"/></Cell>
    <Cell><Data ss:Type="String">affinitycapturems</Data><NamedCell
      ss:Name="Print_Area"/></Cell>
    <Cell><Data ss:Type="Number">12819204</Data><NamedCell ss:Name="Print_Area"/></Cell>
   </Row>
   <Row>
    <Cell><Data ss:Type="String">YAL043C</Data><NamedCell ss:Name="Print_Area"/></Cell>
    <Cell><Data ss:Type="String">YLR277C</Data><NamedCell ss:Name="Print_Area"/></Cell>
    <Cell><Data ss:Type="String">affinitycapturems</Data><NamedCell
      ss:Name="Print_Area"/></Cell>
    <Cell><Data ss:Type="Number">11841235</Data><NamedCell ss:Name="Print_Area"/></Cell>
   </Row>
   <Row>
    <Cell><Data ss:Type="String">YAL043C</Data><NamedCell ss:Name="Print_Area"/></Cell>
    <Cell><Data ss:Type="String">YMR039C</Data><NamedCell ss:Name="Print_Area"/></Cell>
    <Cell><Data ss:Type="String">affinitycapturewestern</Data><NamedCell
      ss:Name="Print_Area"/></Cell>
    <Cell><Data ss:Type="Number">12704082</Data><NamedCell ss:Name="Print_Area"/></Cell>
   </Row>
   <Row>
    <Cell><Data ss:Type="String">YAL043C</Data><NamedCell ss:Name="Print_Area"/></Cell>
    <Cell><Data ss:Type="String">YMR039C</Data><NamedCell ss:Name="Print_Area"/></Cell>
    <Cell><Data ss:Type="String">reconstitutedcomplex</Data><NamedCell
      ss:Name="Print_Area"/></Cell>
    <Cell><Data ss:Type="Number">12704082</Data><NamedCell ss:Name="Print_Area"/></Cell>
   </Row>
   <Row>
    <Cell><Data ss:Type="String">YAL043C</Data><NamedCell ss:Name="Print_Area"/></Cell>
    <Cell><Data ss:Type="String">YMR061W</Data><NamedCell ss:Name="Print_Area"/></Cell>
    <Cell><Data ss:Type="String">affinitycapturems</Data><NamedCell
      ss:Name="Print_Area"/></Cell>
    <Cell><Data ss:Type="Number">16429126</Data><NamedCell ss:Name="Print_Area"/></Cell>
   </Row>
   <Row>
    <Cell><Data ss:Type="String">YAL043C</Data><NamedCell ss:Name="Print_Area"/></Cell>
    <Cell><Data ss:Type="String">YMR061W</Data><NamedCell ss:Name="Print_Area"/></Cell>
    <Cell><Data ss:Type="String">affinitycapturems</Data><NamedCell
      ss:Name="Print_Area"/></Cell>
    <Cell><Data ss:Type="Number">11805826</Data><NamedCell ss:Name="Print_Area"/></Cell>
   </Row>
   <Row>
    <Cell><Data ss:Type="String">YAL043C</Data><NamedCell ss:Name="Print_Area"/></Cell>
    <Cell><Data ss:Type="String">YMR061W</Data><NamedCell ss:Name="Print_Area"/></Cell>
    <Cell><Data ss:Type="String">affinitycapturems</Data><NamedCell
      ss:Name="Print_Area"/></Cell>
    <Cell><Data ss:Type="Number">12819204</Data><NamedCell ss:Name="Print_Area"/></Cell>
   </Row>
   <Row>
    <Cell><Data ss:Type="String">YAL043C</Data><NamedCell ss:Name="Print_Area"/></Cell>
    <Cell><Data ss:Type="String">YNL222W</Data><NamedCell ss:Name="Print_Area"/></Cell>
    <Cell><Data ss:Type="String">affinitycapturems</Data><NamedCell
      ss:Name="Print_Area"/></Cell>
    <Cell><Data ss:Type="Number">14759368</Data><NamedCell ss:Name="Print_Area"/></Cell>
   </Row>
   <Row>
    <Cell><Data ss:Type="String">YAL043C</Data><NamedCell ss:Name="Print_Area"/></Cell>
    <Cell><Data ss:Type="String">YNL222W</Data><NamedCell ss:Name="Print_Area"/></Cell>
    <Cell><Data ss:Type="String">affinitycapturems</Data><NamedCell
      ss:Name="Print_Area"/></Cell>
    <Cell><Data ss:Type="Number">12819204</Data><NamedCell ss:Name="Print_Area"/></Cell>
   </Row>
   <Row>
    <Cell><Data ss:Type="String">YAL043C</Data><NamedCell ss:Name="Print_Area"/></Cell>
    <Cell><Data ss:Type="String">YNL222W</Data><NamedCell ss:Name="Print_Area"/></Cell>
    <Cell><Data ss:Type="String">twohybrid</Data><NamedCell ss:Name="Print_Area"/></Cell>
    <Cell><Data ss:Type="Number">12453421</Data><NamedCell ss:Name="Print_Area"/></Cell>
   </Row>
   <Row>
    <Cell><Data ss:Type="String">YAL043C</Data><NamedCell ss:Name="Print_Area"/></Cell>
    <Cell><Data ss:Type="String">YNL222W</Data><NamedCell ss:Name="Print_Area"/></Cell>
    <Cell><Data ss:Type="String">reconstitutedcomplex</Data><NamedCell
      ss:Name="Print_Area"/></Cell>
    <Cell><Data ss:Type="Number">12453421</Data><NamedCell ss:Name="Print_Area"/></Cell>
   </Row>
   <Row>
    <Cell><Data ss:Type="String">YAL043C</Data><NamedCell ss:Name="Print_Area"/></Cell>
    <Cell><Data ss:Type="String">YNL222W</Data><NamedCell ss:Name="Print_Area"/></Cell>
    <Cell><Data ss:Type="String">affinitycapturems</Data><NamedCell
      ss:Name="Print_Area"/></Cell>
    <Cell><Data ss:Type="Number">16429126</Data><NamedCell ss:Name="Print_Area"/></Cell>
   </Row>
   <Row>
    <Cell><Data ss:Type="String">YAL043C</Data><NamedCell ss:Name="Print_Area"/></Cell>
    <Cell><Data ss:Type="String">YNL222W</Data><NamedCell ss:Name="Print_Area"/></Cell>
    <Cell><Data ss:Type="String">affinitycapturems</Data><NamedCell
      ss:Name="Print_Area"/></Cell>
    <Cell><Data ss:Type="Number">12704082</Data><NamedCell ss:Name="Print_Area"/></Cell>
   </Row>
   <Row>
    <Cell><Data ss:Type="String">YAL043C</Data><NamedCell ss:Name="Print_Area"/></Cell>
    <Cell><Data ss:Type="String">YNL222W</Data><NamedCell ss:Name="Print_Area"/></Cell>
    <Cell><Data ss:Type="String">affinitycapturewestern</Data><NamedCell
      ss:Name="Print_Area"/></Cell>
    <Cell><Data ss:Type="Number">12704082</Data><NamedCell ss:Name="Print_Area"/></Cell>
   </Row>
   <Row>
    <Cell><Data ss:Type="String">YAL043C</Data><NamedCell ss:Name="Print_Area"/></Cell>
    <Cell><Data ss:Type="String">YNL317W</Data><NamedCell ss:Name="Print_Area"/></Cell>
    <Cell><Data ss:Type="String">affinitycapturems</Data><NamedCell
      ss:Name="Print_Area"/></Cell>
    <Cell><Data ss:Type="Number">11841235</Data><NamedCell ss:Name="Print_Area"/></Cell>
   </Row>
   <Row>
    <Cell><Data ss:Type="String">YAL043C</Data><NamedCell ss:Name="Print_Area"/></Cell>
    <Cell><Data ss:Type="String">YNL317W</Data><NamedCell ss:Name="Print_Area"/></Cell>
    <Cell><Data ss:Type="String">affinitycapturems</Data><NamedCell
      ss:Name="Print_Area"/></Cell>
    <Cell><Data ss:Type="Number">14759368</Data><NamedCell ss:Name="Print_Area"/></Cell>
   </Row>
   <Row>
    <Cell><Data ss:Type="String">YAL043C</Data><NamedCell ss:Name="Print_Area"/></Cell>
    <Cell><Data ss:Type="String">YNL317W</Data><NamedCell ss:Name="Print_Area"/></Cell>
    <Cell><Data ss:Type="String">affinitycapturems</Data><NamedCell
      ss:Name="Print_Area"/></Cell>
    <Cell><Data ss:Type="Number">12704082</Data><NamedCell ss:Name="Print_Area"/></Cell>
   </Row>
   <Row>
    <Cell><Data ss:Type="String">YAL043C</Data><NamedCell ss:Name="Print_Area"/></Cell>
    <Cell><Data ss:Type="String">YNL317W</Data><NamedCell ss:Name="Print_Area"/></Cell>
    <Cell><Data ss:Type="String">affinitycapturewestern</Data><NamedCell
      ss:Name="Print_Area"/></Cell>
    <Cell><Data ss:Type="Number">11713271</Data><NamedCell ss:Name="Print_Area"/></Cell>
   </Row>
   <Row>
    <Cell><Data ss:Type="String">YAL043C</Data><NamedCell ss:Name="Print_Area"/></Cell>
    <Cell><Data ss:Type="String">YNL317W</Data><NamedCell ss:Name="Print_Area"/></Cell>
    <Cell><Data ss:Type="String">affinitycapturems</Data><NamedCell
      ss:Name="Print_Area"/></Cell>
    <Cell><Data ss:Type="Number">16429126</Data><NamedCell ss:Name="Print_Area"/></Cell>
   </Row>
   <Row>
    <Cell><Data ss:Type="String">YAL043C</Data><NamedCell ss:Name="Print_Area"/></Cell>
    <Cell><Data ss:Type="String">YNL317W</Data><NamedCell ss:Name="Print_Area"/></Cell>
    <Cell><Data ss:Type="String">affinitycapturems</Data><NamedCell
      ss:Name="Print_Area"/></Cell>
    <Cell><Data ss:Type="Number">12453421</Data><NamedCell ss:Name="Print_Area"/></Cell>
   </Row>
   <Row>
    <Cell><Data ss:Type="String">YAL043C</Data><NamedCell ss:Name="Print_Area"/></Cell>
    <Cell><Data ss:Type="String">YNL317W</Data><NamedCell ss:Name="Print_Area"/></Cell>
    <Cell><Data ss:Type="String">affinitycapturems</Data><NamedCell
      ss:Name="Print_Area"/></Cell>
    <Cell><Data ss:Type="Number">11713271</Data><NamedCell ss:Name="Print_Area"/></Cell>
   </Row>
   <Row>
    <Cell><Data ss:Type="String">YAL043C</Data><NamedCell ss:Name="Print_Area"/></Cell>
    <Cell><Data ss:Type="String">YNL317W</Data><NamedCell ss:Name="Print_Area"/></Cell>
    <Cell><Data ss:Type="String">affinitycapturems</Data><NamedCell
      ss:Name="Print_Area"/></Cell>
    <Cell><Data ss:Type="Number">12819204</Data><NamedCell ss:Name="Print_Area"/></Cell>
   </Row>
   <Row>
    <Cell><Data ss:Type="String">YAL043C</Data><NamedCell ss:Name="Print_Area"/></Cell>
    <Cell><Data ss:Type="String">YNL317W</Data><NamedCell ss:Name="Print_Area"/></Cell>
    <Cell><Data ss:Type="String">affinitycapturewestern</Data><NamedCell
      ss:Name="Print_Area"/></Cell>
    <Cell><Data ss:Type="Number">10619842</Data><NamedCell ss:Name="Print_Area"/></Cell>
   </Row>
   <Row>
    <Cell><Data ss:Type="String">YAL043C</Data><NamedCell ss:Name="Print_Area"/></Cell>
    <Cell><Data ss:Type="String">YNL317W</Data><NamedCell ss:Name="Print_Area"/></Cell>
    <Cell><Data ss:Type="String">affinitycapturems</Data><NamedCell
      ss:Name="Print_Area"/></Cell>
    <Cell><Data ss:Type="Number">11805826</Data><NamedCell ss:Name="Print_Area"/></Cell>
   </Row>
   <Row>
    <Cell><Data ss:Type="String">YAL043C</Data><NamedCell ss:Name="Print_Area"/></Cell>
    <Cell><Data ss:Type="String">YPL008W</Data><NamedCell ss:Name="Print_Area"/></Cell>
    <Cell><Data ss:Type="String">affinitycapturems</Data><NamedCell
      ss:Name="Print_Area"/></Cell>
    <Cell><Data ss:Type="Number">12819204</Data><NamedCell ss:Name="Print_Area"/></Cell>
   </Row>
   <Row>
    <Cell><Data ss:Type="String">YAL043C</Data><NamedCell ss:Name="Print_Area"/></Cell>
    <Cell><Data ss:Type="String">YPL008W</Data><NamedCell ss:Name="Print_Area"/></Cell>
    <Cell><Data ss:Type="String">affinitycapturems</Data><NamedCell
      ss:Name="Print_Area"/></Cell>
    <Cell><Data ss:Type="Number">12704082</Data><NamedCell ss:Name="Print_Area"/></Cell>
   </Row>
   <Row>
    <Cell><Data ss:Type="String">YAL043C</Data><NamedCell ss:Name="Print_Area"/></Cell>
    <Cell><Data ss:Type="String">YPR107C</Data><NamedCell ss:Name="Print_Area"/></Cell>
    <Cell><Data ss:Type="String">affinitycapturems</Data><NamedCell
      ss:Name="Print_Area"/></Cell>
    <Cell><Data ss:Type="Number">16429126</Data><NamedCell ss:Name="Print_Area"/></Cell>
   </Row>
   <Row>
    <Cell><Data ss:Type="String">YAL043C</Data><NamedCell ss:Name="Print_Area"/></Cell>
    <Cell><Data ss:Type="String">YPR107C</Data><NamedCell ss:Name="Print_Area"/></Cell>
    <Cell><Data ss:Type="String">affinitycapturems</Data><NamedCell
      ss:Name="Print_Area"/></Cell>
    <Cell><Data ss:Type="Number">11805826</Data><NamedCell ss:Name="Print_Area"/></Cell>
   </Row>
   <Row>
    <Cell><Data ss:Type="String">YAL043C</Data><NamedCell ss:Name="Print_Area"/></Cell>
    <Cell><Data ss:Type="String">YPR107C</Data><NamedCell ss:Name="Print_Area"/></Cell>
    <Cell><Data ss:Type="String">affinitycapturems</Data><NamedCell
      ss:Name="Print_Area"/></Cell>
    <Cell><Data ss:Type="Number">12704082</Data><NamedCell ss:Name="Print_Area"/></Cell>
   </Row>
   <Row>
    <Cell><Data ss:Type="String">YAL043C</Data><NamedCell ss:Name="Print_Area"/></Cell>
    <Cell><Data ss:Type="String">YPR107C</Data><NamedCell ss:Name="Print_Area"/></Cell>
    <Cell><Data ss:Type="String">unknown</Data><NamedCell ss:Name="Print_Area"/></Cell>
    <Cell><Data ss:Type="Number">10523662</Data><NamedCell ss:Name="Print_Area"/></Cell>
   </Row>
   <Row>
    <Cell><Data ss:Type="String">YAL043C</Data><NamedCell ss:Name="Print_Area"/></Cell>
    <Cell><Data ss:Type="String">YPR107C</Data><NamedCell ss:Name="Print_Area"/></Cell>
    <Cell><Data ss:Type="String">affinitycapturems</Data><NamedCell
      ss:Name="Print_Area"/></Cell>
    <Cell><Data ss:Type="Number">16554755</Data><NamedCell ss:Name="Print_Area"/></Cell>
   </Row>
   <Row>
    <Cell><Data ss:Type="String">YAL043C</Data><NamedCell ss:Name="Print_Area"/></Cell>
    <Cell><Data ss:Type="String">YPR107C</Data><NamedCell ss:Name="Print_Area"/></Cell>
    <Cell><Data ss:Type="String">affinitycapturems</Data><NamedCell
      ss:Name="Print_Area"/></Cell>
    <Cell><Data ss:Type="Number">12819204</Data><NamedCell ss:Name="Print_Area"/></Cell>
   </Row>
   <Row>
    <Cell><Data ss:Type="String">YAL047C</Data><NamedCell ss:Name="Print_Area"/></Cell>
    <Cell><Data ss:Type="String">YHR172W</Data><NamedCell ss:Name="Print_Area"/></Cell>
    <Cell><Data ss:Type="String">affinitycapturewestern</Data><NamedCell
      ss:Name="Print_Area"/></Cell>
    <Cell><Data ss:Type="Number">9670012</Data><NamedCell ss:Name="Print_Area"/></Cell>
   </Row>
   <Row>
    <Cell><Data ss:Type="String">YAL047C</Data><NamedCell ss:Name="Print_Area"/></Cell>
    <Cell><Data ss:Type="String">YHR172W</Data><NamedCell ss:Name="Print_Area"/></Cell>
    <Cell><Data ss:Type="String">affinitycapturems</Data><NamedCell
      ss:Name="Print_Area"/></Cell>
    <Cell><Data ss:Type="Number">16554755</Data><NamedCell ss:Name="Print_Area"/></Cell>
   </Row>
   <Row>
    <Cell><Data ss:Type="String">YAL047C</Data><NamedCell ss:Name="Print_Area"/></Cell>
    <Cell><Data ss:Type="String">YHR172W</Data><NamedCell ss:Name="Print_Area"/></Cell>
    <Cell><Data ss:Type="String">affinitycapturewestern</Data><NamedCell
      ss:Name="Print_Area"/></Cell>
    <Cell><Data ss:Type="Number">10428957</Data><NamedCell ss:Name="Print_Area"/></Cell>
   </Row>
   <Row>
    <Cell><Data ss:Type="String">YAL047C</Data><NamedCell ss:Name="Print_Area"/></Cell>
    <Cell><Data ss:Type="String">YHR172W</Data><NamedCell ss:Name="Print_Area"/></Cell>
    <Cell><Data ss:Type="String">affinitycapturewestern</Data><NamedCell
      ss:Name="Print_Area"/></Cell>
    <Cell><Data ss:Type="Number">12970190</Data><NamedCell ss:Name="Print_Area"/></Cell>
   </Row>
   <Row>
    <Cell><Data ss:Type="String">YAL047C</Data><NamedCell ss:Name="Print_Area"/></Cell>
    <Cell><Data ss:Type="String">YHR172W</Data><NamedCell ss:Name="Print_Area"/></Cell>
    <Cell><Data ss:Type="String">unknown</Data><NamedCell ss:Name="Print_Area"/></Cell>
    <Cell><Data ss:Type="Number">9670012</Data><NamedCell ss:Name="Print_Area"/></Cell>
   </Row>
   <Row>
    <Cell><Data ss:Type="String">YAL047C</Data><NamedCell ss:Name="Print_Area"/></Cell>
    <Cell><Data ss:Type="String">YHR172W</Data><NamedCell ss:Name="Print_Area"/></Cell>
    <Cell><Data ss:Type="String">twohybrid</Data><NamedCell ss:Name="Print_Area"/></Cell>
    <Cell><Data ss:Type="Number">9670012</Data><NamedCell ss:Name="Print_Area"/></Cell>
   </Row>
   <Row>
    <Cell><Data ss:Type="String">YAL047C</Data><NamedCell ss:Name="Print_Area"/></Cell>
    <Cell><Data ss:Type="String">YHR172W</Data><NamedCell ss:Name="Print_Area"/></Cell>
    <Cell><Data ss:Type="String">reconstitutedcomplex</Data><NamedCell
      ss:Name="Print_Area"/></Cell>
    <Cell><Data ss:Type="Number">12970190</Data><NamedCell ss:Name="Print_Area"/></Cell>
   </Row>
   <Row>
    <Cell><Data ss:Type="String">YAL047C</Data><NamedCell ss:Name="Print_Area"/></Cell>
    <Cell><Data ss:Type="String">YHR172W</Data><NamedCell ss:Name="Print_Area"/></Cell>
    <Cell><Data ss:Type="String">affinitycapturems</Data><NamedCell
      ss:Name="Print_Area"/></Cell>
    <Cell><Data ss:Type="Number">16429126</Data><NamedCell ss:Name="Print_Area"/></Cell>
   </Row>
   <Row>
    <Cell><Data ss:Type="String">YAL047C</Data><NamedCell ss:Name="Print_Area"/></Cell>
    <Cell><Data ss:Type="String">YHR172W</Data><NamedCell ss:Name="Print_Area"/></Cell>
    <Cell><Data ss:Type="String">reconstitutedcomplex</Data><NamedCell
      ss:Name="Print_Area"/></Cell>
    <Cell><Data ss:Type="Number">9670012</Data><NamedCell ss:Name="Print_Area"/></Cell>
   </Row>
   <Row>
    <Cell><Data ss:Type="String">YAL047C</Data><NamedCell ss:Name="Print_Area"/></Cell>
    <Cell><Data ss:Type="String">YLR045C</Data><NamedCell ss:Name="Print_Area"/></Cell>
    <Cell><Data ss:Type="String">twohybrid</Data><NamedCell ss:Name="Print_Area"/></Cell>
    <Cell><Data ss:Type="Number">9606209</Data><NamedCell ss:Name="Print_Area"/></Cell>
   </Row>
   <Row>
    <Cell><Data ss:Type="String">YAL047C</Data><NamedCell ss:Name="Print_Area"/></Cell>
    <Cell><Data ss:Type="String">YLR045C</Data><NamedCell ss:Name="Print_Area"/></Cell>
    <Cell><Data ss:Type="String">twohybrid</Data><NamedCell ss:Name="Print_Area"/></Cell>
    <Cell><Data ss:Type="Number">12970190</Data><NamedCell ss:Name="Print_Area"/></Cell>
   </Row>
   <Row>
    <Cell><Data ss:Type="String">YAL047C</Data><NamedCell ss:Name="Print_Area"/></Cell>
    <Cell><Data ss:Type="String">YLR045C</Data><NamedCell ss:Name="Print_Area"/></Cell>
    <Cell><Data ss:Type="String">affinitycapturewestern</Data><NamedCell
      ss:Name="Print_Area"/></Cell>
    <Cell><Data ss:Type="Number">12970190</Data><NamedCell ss:Name="Print_Area"/></Cell>
   </Row>
   <Row>
    <Cell><Data ss:Type="String">YAL047C</Data><NamedCell ss:Name="Print_Area"/></Cell>
    <Cell><Data ss:Type="String">YLR045C</Data><NamedCell ss:Name="Print_Area"/></Cell>
    <Cell><Data ss:Type="String">reconstitutedcomplex</Data><NamedCell
      ss:Name="Print_Area"/></Cell>
    <Cell><Data ss:Type="Number">12970190</Data><NamedCell ss:Name="Print_Area"/></Cell>
   </Row>
   <Row>
    <Cell><Data ss:Type="String">YAL047C</Data><NamedCell ss:Name="Print_Area"/></Cell>
    <Cell><Data ss:Type="String">YLR045C</Data><NamedCell ss:Name="Print_Area"/></Cell>
    <Cell><Data ss:Type="String">affinitycapturewestern</Data><NamedCell
      ss:Name="Print_Area"/></Cell>
    <Cell><Data ss:Type="Number">9606209</Data><NamedCell ss:Name="Print_Area"/></Cell>
   </Row>
   <Row>
    <Cell><Data ss:Type="String">YAL047C</Data><NamedCell ss:Name="Print_Area"/></Cell>
    <Cell><Data ss:Type="String">YLR045C</Data><NamedCell ss:Name="Print_Area"/></Cell>
    <Cell><Data ss:Type="String">unknown</Data><NamedCell ss:Name="Print_Area"/></Cell>
    <Cell><Data ss:Type="Number">9606209</Data><NamedCell ss:Name="Print_Area"/></Cell>
   </Row>
   <Row>
    <Cell><Data ss:Type="String">YAL047C</Data><NamedCell ss:Name="Print_Area"/></Cell>
    <Cell><Data ss:Type="String">YLR212C</Data><NamedCell ss:Name="Print_Area"/></Cell>
    <Cell><Data ss:Type="String">reconstitutedcomplex</Data><NamedCell
      ss:Name="Print_Area"/></Cell>
    <Cell><Data ss:Type="Number">12970190</Data><NamedCell ss:Name="Print_Area"/></Cell>
   </Row>
   <Row>
    <Cell><Data ss:Type="String">YAL047C</Data><NamedCell ss:Name="Print_Area"/></Cell>
    <Cell><Data ss:Type="String">YLR212C</Data><NamedCell ss:Name="Print_Area"/></Cell>
    <Cell><Data ss:Type="String">affinitycapturewestern</Data><NamedCell
      ss:Name="Print_Area"/></Cell>
    <Cell><Data ss:Type="Number">12970190</Data><NamedCell ss:Name="Print_Area"/></Cell>
   </Row>
   <Row>
    <Cell><Data ss:Type="String">YAL047C</Data><NamedCell ss:Name="Print_Area"/></Cell>
    <Cell><Data ss:Type="String">YLR212C</Data><NamedCell ss:Name="Print_Area"/></Cell>
    <Cell><Data ss:Type="String">twohybrid</Data><NamedCell ss:Name="Print_Area"/></Cell>
    <Cell><Data ss:Type="Number">9670012</Data><NamedCell ss:Name="Print_Area"/></Cell>
   </Row>
   <Row>
    <Cell><Data ss:Type="String">YAL047C</Data><NamedCell ss:Name="Print_Area"/></Cell>
    <Cell><Data ss:Type="String">YLR212C</Data><NamedCell ss:Name="Print_Area"/></Cell>
    <Cell><Data ss:Type="String">reconstitutedcomplex</Data><NamedCell
      ss:Name="Print_Area"/></Cell>
    <Cell><Data ss:Type="Number">9670012</Data><NamedCell ss:Name="Print_Area"/></Cell>
   </Row>
   <Row>
    <Cell><Data ss:Type="String">YAL047C</Data><NamedCell ss:Name="Print_Area"/></Cell>
    <Cell><Data ss:Type="String">YLR212C</Data><NamedCell ss:Name="Print_Area"/></Cell>
    <Cell><Data ss:Type="String">affinitycapturewestern</Data><NamedCell
      ss:Name="Print_Area"/></Cell>
    <Cell><Data ss:Type="Number">9670012</Data><NamedCell ss:Name="Print_Area"/></Cell>
   </Row>
   <Row>
    <Cell><Data ss:Type="String">YAL047C</Data><NamedCell ss:Name="Print_Area"/></Cell>
    <Cell><Data ss:Type="String">YNL126W</Data><NamedCell ss:Name="Print_Area"/></Cell>
    <Cell><Data ss:Type="String">reconstitutedcomplex</Data><NamedCell
      ss:Name="Print_Area"/></Cell>
    <Cell><Data ss:Type="Number">9670012</Data><NamedCell ss:Name="Print_Area"/></Cell>
   </Row>
   <Row>
    <Cell><Data ss:Type="String">YAL047C</Data><NamedCell ss:Name="Print_Area"/></Cell>
    <Cell><Data ss:Type="String">YNL126W</Data><NamedCell ss:Name="Print_Area"/></Cell>
    <Cell><Data ss:Type="String">reconstitutedcomplex</Data><NamedCell
      ss:Name="Print_Area"/></Cell>
    <Cell><Data ss:Type="Number">12970190</Data><NamedCell ss:Name="Print_Area"/></Cell>
   </Row>
   <Row>
    <Cell><Data ss:Type="String">YAL047C</Data><NamedCell ss:Name="Print_Area"/></Cell>
    <Cell><Data ss:Type="String">YNL126W</Data><NamedCell ss:Name="Print_Area"/></Cell>
    <Cell><Data ss:Type="String">twohybrid</Data><NamedCell ss:Name="Print_Area"/></Cell>
    <Cell><Data ss:Type="Number">9670012</Data><NamedCell ss:Name="Print_Area"/></Cell>
   </Row>
   <Row>
    <Cell><Data ss:Type="String">YAL047C</Data><NamedCell ss:Name="Print_Area"/></Cell>
    <Cell><Data ss:Type="String">YNL126W</Data><NamedCell ss:Name="Print_Area"/></Cell>
    <Cell><Data ss:Type="String">twohybrid</Data><NamedCell ss:Name="Print_Area"/></Cell>
    <Cell><Data ss:Type="Number">12970190</Data><NamedCell ss:Name="Print_Area"/></Cell>
   </Row>
   <Row>
    <Cell><Data ss:Type="String">YAL047C</Data><NamedCell ss:Name="Print_Area"/></Cell>
    <Cell><Data ss:Type="String">YNL126W</Data><NamedCell ss:Name="Print_Area"/></Cell>
    <Cell><Data ss:Type="String">affinitycapturewestern</Data><NamedCell
      ss:Name="Print_Area"/></Cell>
    <Cell><Data ss:Type="Number">12970190</Data><NamedCell ss:Name="Print_Area"/></Cell>
   </Row>
   <Row>
    <Cell><Data ss:Type="String">YAL047C</Data><NamedCell ss:Name="Print_Area"/></Cell>
    <Cell><Data ss:Type="String">YNL126W</Data><NamedCell ss:Name="Print_Area"/></Cell>
    <Cell><Data ss:Type="String">affinitycapturewestern</Data><NamedCell
      ss:Name="Print_Area"/></Cell>
    <Cell><Data ss:Type="Number">9670012</Data><NamedCell ss:Name="Print_Area"/></Cell>
   </Row>
   <Row>
    <Cell><Data ss:Type="String">YAL047C</Data><NamedCell ss:Name="Print_Area"/></Cell>
    <Cell><Data ss:Type="String">YNL126W</Data><NamedCell ss:Name="Print_Area"/></Cell>
    <Cell><Data ss:Type="String">unknown</Data><NamedCell ss:Name="Print_Area"/></Cell>
    <Cell><Data ss:Type="Number">9670012</Data><NamedCell ss:Name="Print_Area"/></Cell>
   </Row>
   <Row>
    <Cell><Data ss:Type="String">YAL047C</Data><NamedCell ss:Name="Print_Area"/></Cell>
    <Cell><Data ss:Type="String">YNL188W</Data><NamedCell ss:Name="Print_Area"/></Cell>
    <Cell><Data ss:Type="String">twohybrid</Data><NamedCell ss:Name="Print_Area"/></Cell>
    <Cell><Data ss:Type="Number">10428957</Data><NamedCell ss:Name="Print_Area"/></Cell>
   </Row>
   <Row>
    <Cell><Data ss:Type="String">YAL047C</Data><NamedCell ss:Name="Print_Area"/></Cell>
    <Cell><Data ss:Type="String">YNL188W</Data><NamedCell ss:Name="Print_Area"/></Cell>
    <Cell><Data ss:Type="String">reconstitutedcomplex</Data><NamedCell
      ss:Name="Print_Area"/></Cell>
    <Cell><Data ss:Type="Number">10428957</Data><NamedCell ss:Name="Print_Area"/></Cell>
   </Row>
   <Row>
    <Cell><Data ss:Type="String">YAL047C</Data><NamedCell ss:Name="Print_Area"/></Cell>
    <Cell><Data ss:Type="String">YNL188W</Data><NamedCell ss:Name="Print_Area"/></Cell>
    <Cell><Data ss:Type="String">colocalization</Data><NamedCell
      ss:Name="Print_Area"/></Cell>
    <Cell><Data ss:Type="Number">10428957</Data><NamedCell ss:Name="Print_Area"/></Cell>
   </Row>
   <Row>
    <Cell><Data ss:Type="String">YAL047C</Data><NamedCell ss:Name="Print_Area"/></Cell>
    <Cell><Data ss:Type="String">YOR373W</Data><NamedCell ss:Name="Print_Area"/></Cell>
    <Cell><Data ss:Type="String">twohybrid</Data><NamedCell ss:Name="Print_Area"/></Cell>
    <Cell><Data ss:Type="Number">11101520</Data><NamedCell ss:Name="Print_Area"/></Cell>
   </Row>
   <Row>
    <Cell><Data ss:Type="String">YAL047C</Data><NamedCell ss:Name="Print_Area"/></Cell>
    <Cell><Data ss:Type="String">YOR373W</Data><NamedCell ss:Name="Print_Area"/></Cell>
    <Cell><Data ss:Type="String">affinitycapturewestern</Data><NamedCell
      ss:Name="Print_Area"/></Cell>
    <Cell><Data ss:Type="Number">11101520</Data><NamedCell ss:Name="Print_Area"/></Cell>
   </Row>
   <Row>
    <Cell><Data ss:Type="String">YAL051W</Data><NamedCell ss:Name="Print_Area"/></Cell>
    <Cell><Data ss:Type="String">YOR363C</Data><NamedCell ss:Name="Print_Area"/></Cell>
    <Cell><Data ss:Type="String">affinitycapturewestern</Data><NamedCell
      ss:Name="Print_Area"/></Cell>
    <Cell><Data ss:Type="Number">8972187</Data><NamedCell ss:Name="Print_Area"/></Cell>
   </Row>
   <Row>
    <Cell><Data ss:Type="String">YAL051W</Data><NamedCell ss:Name="Print_Area"/></Cell>
    <Cell><Data ss:Type="String">YOR363C</Data><NamedCell ss:Name="Print_Area"/></Cell>
    <Cell><Data ss:Type="String">unknown</Data><NamedCell ss:Name="Print_Area"/></Cell>
    <Cell><Data ss:Type="Number">8972187</Data><NamedCell ss:Name="Print_Area"/></Cell>
   </Row>
   <Row>
    <Cell><Data ss:Type="String">YAL051W</Data><NamedCell ss:Name="Print_Area"/></Cell>
    <Cell><Data ss:Type="String">YOR363C</Data><NamedCell ss:Name="Print_Area"/></Cell>
    <Cell><Data ss:Type="String">colocalization</Data><NamedCell
      ss:Name="Print_Area"/></Cell>
    <Cell><Data ss:Type="Number">9288897</Data><NamedCell ss:Name="Print_Area"/></Cell>
   </Row>
   <Row>
    <Cell><Data ss:Type="String">YAL051W</Data><NamedCell ss:Name="Print_Area"/></Cell>
    <Cell><Data ss:Type="String">YOR363C</Data><NamedCell ss:Name="Print_Area"/></Cell>
    <Cell><Data ss:Type="String">reconstitutedcomplex</Data><NamedCell
      ss:Name="Print_Area"/></Cell>
    <Cell><Data ss:Type="Number">12709061</Data><NamedCell ss:Name="Print_Area"/></Cell>
   </Row>
   <Row>
    <Cell><Data ss:Type="String">YAL055W</Data><NamedCell ss:Name="Print_Area"/></Cell>
    <Cell><Data ss:Type="String">YDR265W</Data><NamedCell ss:Name="Print_Area"/></Cell>
    <Cell><Data ss:Type="String">twohybrid</Data><NamedCell ss:Name="Print_Area"/></Cell>
    <Cell><Data ss:Type="Number">12876220</Data><NamedCell ss:Name="Print_Area"/></Cell>
   </Row>
   <Row>
    <Cell><Data ss:Type="String">YAL055W</Data><NamedCell ss:Name="Print_Area"/></Cell>
    <Cell><Data ss:Type="String">YDR265W</Data><NamedCell ss:Name="Print_Area"/></Cell>
    <Cell><Data ss:Type="String">reconstitutedcomplex</Data><NamedCell
      ss:Name="Print_Area"/></Cell>
    <Cell><Data ss:Type="Number">12876220</Data><NamedCell ss:Name="Print_Area"/></Cell>
   </Row>
   <Row>
    <Cell><Data ss:Type="String">YAL055W</Data><NamedCell ss:Name="Print_Area"/></Cell>
    <Cell><Data ss:Type="String">YGR133W</Data><NamedCell ss:Name="Print_Area"/></Cell>
    <Cell><Data ss:Type="String">reconstitutedcomplex</Data><NamedCell
      ss:Name="Print_Area"/></Cell>
    <Cell><Data ss:Type="Number">12876220</Data><NamedCell ss:Name="Print_Area"/></Cell>
   </Row>
   <Row>
    <Cell><Data ss:Type="String">YAL055W</Data><NamedCell ss:Name="Print_Area"/></Cell>
    <Cell><Data ss:Type="String">YGR133W</Data><NamedCell ss:Name="Print_Area"/></Cell>
    <Cell><Data ss:Type="String">twohybrid</Data><NamedCell ss:Name="Print_Area"/></Cell>
    <Cell><Data ss:Type="Number">12876220</Data><NamedCell ss:Name="Print_Area"/></Cell>
   </Row>
   <Row>
    <Cell><Data ss:Type="String">YAL056W</Data><NamedCell ss:Name="Print_Area"/></Cell>
    <Cell><Data ss:Type="String">YER020W</Data><NamedCell ss:Name="Print_Area"/></Cell>
    <Cell><Data ss:Type="String">twohybrid</Data><NamedCell ss:Name="Print_Area"/></Cell>
    <Cell><Data ss:Type="Number">12538771</Data><NamedCell ss:Name="Print_Area"/></Cell>
   </Row>
   <Row>
    <Cell><Data ss:Type="String">YAL056W</Data><NamedCell ss:Name="Print_Area"/></Cell>
    <Cell><Data ss:Type="String">YER020W</Data><NamedCell ss:Name="Print_Area"/></Cell>
    <Cell><Data ss:Type="String">reconstitutedcomplex</Data><NamedCell
      ss:Name="Print_Area"/></Cell>
    <Cell><Data ss:Type="Number">12150916</Data><NamedCell ss:Name="Print_Area"/></Cell>
   </Row>
   <Row>
    <Cell><Data ss:Type="String">YAL056W</Data><NamedCell ss:Name="Print_Area"/></Cell>
    <Cell><Data ss:Type="String">YER020W</Data><NamedCell ss:Name="Print_Area"/></Cell>
    <Cell><Data ss:Type="String">unknown</Data><NamedCell ss:Name="Print_Area"/></Cell>
    <Cell><Data ss:Type="Number">12538771</Data><NamedCell ss:Name="Print_Area"/></Cell>
   </Row>
   <Row>
    <Cell><Data ss:Type="String">YAL056W</Data><NamedCell ss:Name="Print_Area"/></Cell>
    <Cell><Data ss:Type="String">YER020W</Data><NamedCell ss:Name="Print_Area"/></Cell>
    <Cell><Data ss:Type="String">affinitycapturewestern</Data><NamedCell
      ss:Name="Print_Area"/></Cell>
    <Cell><Data ss:Type="Number">12150916</Data><NamedCell ss:Name="Print_Area"/></Cell>
   </Row>
   <Row>
    <Cell><Data ss:Type="String">YAL056W</Data><NamedCell ss:Name="Print_Area"/></Cell>
    <Cell><Data ss:Type="String">YER020W</Data><NamedCell ss:Name="Print_Area"/></Cell>
    <Cell><Data ss:Type="String">twohybrid</Data><NamedCell ss:Name="Print_Area"/></Cell>
    <Cell><Data ss:Type="Number">12150916</Data><NamedCell ss:Name="Print_Area"/></Cell>
   </Row>
   <Row>
    <Cell><Data ss:Type="String">YAL062W</Data><NamedCell ss:Name="Print_Area"/></Cell>
    <Cell><Data ss:Type="String">YDR388W</Data><NamedCell ss:Name="Print_Area"/></Cell>
    <Cell><Data ss:Type="String">twohybrid</Data><NamedCell ss:Name="Print_Area"/></Cell>
    <Cell><Data ss:Type="Number">15561700</Data><NamedCell ss:Name="Print_Area"/></Cell>
   </Row>
   <Row>
    <Cell><Data ss:Type="String">YAL062W</Data><NamedCell ss:Name="Print_Area"/></Cell>
    <Cell><Data ss:Type="String">YDR388W</Data><NamedCell ss:Name="Print_Area"/></Cell>
    <Cell><Data ss:Type="String">affinitycapturewestern</Data><NamedCell
      ss:Name="Print_Area"/></Cell>
    <Cell><Data ss:Type="Number">15561700</Data><NamedCell ss:Name="Print_Area"/></Cell>
   </Row>
   <Row>
    <Cell><Data ss:Type="String">YAR002C-A</Data><NamedCell ss:Name="Print_Area"/></Cell>
    <Cell><Data ss:Type="String">YGL200C</Data><NamedCell ss:Name="Print_Area"/></Cell>
    <Cell><Data ss:Type="String">affinitycapturems</Data><NamedCell
      ss:Name="Print_Area"/></Cell>
    <Cell><Data ss:Type="Number">16429126</Data><NamedCell ss:Name="Print_Area"/></Cell>
   </Row>
   <Row>
    <Cell><Data ss:Type="String">YAR002C-A</Data><NamedCell ss:Name="Print_Area"/></Cell>
    <Cell><Data ss:Type="String">YGL200C</Data><NamedCell ss:Name="Print_Area"/></Cell>
    <Cell><Data ss:Type="String">cofractionation</Data><NamedCell
      ss:Name="Print_Area"/></Cell>
    <Cell><Data ss:Type="Number">11157978</Data><NamedCell ss:Name="Print_Area"/></Cell>
   </Row>
   <Row>
    <Cell><Data ss:Type="String">YAR002C-A</Data><NamedCell ss:Name="Print_Area"/></Cell>
    <Cell><Data ss:Type="String">YGL200C</Data><NamedCell ss:Name="Print_Area"/></Cell>
    <Cell><Data ss:Type="String">affinitycapturems</Data><NamedCell
      ss:Name="Print_Area"/></Cell>
    <Cell><Data ss:Type="Number">16554755</Data><NamedCell ss:Name="Print_Area"/></Cell>
   </Row>
   <Row>
    <Cell><Data ss:Type="String">YAR002C-A</Data><NamedCell ss:Name="Print_Area"/></Cell>
    <Cell><Data ss:Type="String">YGL200C</Data><NamedCell ss:Name="Print_Area"/></Cell>
    <Cell><Data ss:Type="String">affinitycapturems</Data><NamedCell
      ss:Name="Print_Area"/></Cell>
    <Cell><Data ss:Type="Number">11805826</Data><NamedCell ss:Name="Print_Area"/></Cell>
   </Row>
   <Row>
    <Cell><Data ss:Type="String">YAR002C-A</Data><NamedCell ss:Name="Print_Area"/></Cell>
    <Cell><Data ss:Type="String">YGL200C</Data><NamedCell ss:Name="Print_Area"/></Cell>
    <Cell><Data ss:Type="String">affinitycapturewestern</Data><NamedCell
      ss:Name="Print_Area"/></Cell>
    <Cell><Data ss:Type="Number">10359606</Data><NamedCell ss:Name="Print_Area"/></Cell>
   </Row>
   <Row>
    <Cell><Data ss:Type="String">YAR002C-A</Data><NamedCell ss:Name="Print_Area"/></Cell>
    <Cell><Data ss:Type="String">YGL200C</Data><NamedCell ss:Name="Print_Area"/></Cell>
    <Cell><Data ss:Type="String">cofractionation</Data><NamedCell
      ss:Name="Print_Area"/></Cell>
    <Cell><Data ss:Type="Number">10359606</Data><NamedCell ss:Name="Print_Area"/></Cell>
   </Row>
   <Row>
    <Cell><Data ss:Type="String">YAR002C-A</Data><NamedCell ss:Name="Print_Area"/></Cell>
    <Cell><Data ss:Type="String">YML012W</Data><NamedCell ss:Name="Print_Area"/></Cell>
    <Cell><Data ss:Type="String">affinitycapturewestern</Data><NamedCell
      ss:Name="Print_Area"/></Cell>
    <Cell><Data ss:Type="Number">10359606</Data><NamedCell ss:Name="Print_Area"/></Cell>
   </Row>
   <Row>
    <Cell><Data ss:Type="String">YAR002C-A</Data><NamedCell ss:Name="Print_Area"/></Cell>
    <Cell><Data ss:Type="String">YML012W</Data><NamedCell ss:Name="Print_Area"/></Cell>
    <Cell><Data ss:Type="String">affinitycapturems</Data><NamedCell
      ss:Name="Print_Area"/></Cell>
    <Cell><Data ss:Type="Number">16429126</Data><NamedCell ss:Name="Print_Area"/></Cell>
   </Row>
   <Row>
    <Cell><Data ss:Type="String">YAR002C-A</Data><NamedCell ss:Name="Print_Area"/></Cell>
    <Cell><Data ss:Type="String">YML012W</Data><NamedCell ss:Name="Print_Area"/></Cell>
    <Cell><Data ss:Type="String">cofractionation</Data><NamedCell
      ss:Name="Print_Area"/></Cell>
    <Cell><Data ss:Type="Number">11157978</Data><NamedCell ss:Name="Print_Area"/></Cell>
   </Row>
   <Row>
    <Cell><Data ss:Type="String">YAR002C-A</Data><NamedCell ss:Name="Print_Area"/></Cell>
    <Cell><Data ss:Type="String">YML012W</Data><NamedCell ss:Name="Print_Area"/></Cell>
    <Cell><Data ss:Type="String">cofractionation</Data><NamedCell
      ss:Name="Print_Area"/></Cell>
    <Cell><Data ss:Type="Number">10359606</Data><NamedCell ss:Name="Print_Area"/></Cell>
   </Row>
   <Row>
    <Cell><Data ss:Type="String">YAR002W</Data><NamedCell ss:Name="Print_Area"/></Cell>
    <Cell><Data ss:Type="String">YBR160W</Data><NamedCell ss:Name="Print_Area"/></Cell>
    <Cell><Data ss:Type="String">reconstitutedcomplex</Data><NamedCell
      ss:Name="Print_Area"/></Cell>
    <Cell><Data ss:Type="Number">14574415</Data><NamedCell ss:Name="Print_Area"/></Cell>
   </Row>
   <Row>
    <Cell><Data ss:Type="String">YAR002W</Data><NamedCell ss:Name="Print_Area"/></Cell>
    <Cell><Data ss:Type="String">YBR160W</Data><NamedCell ss:Name="Print_Area"/></Cell>
    <Cell><Data ss:Type="String">biochemicalactivity</Data><NamedCell
      ss:Name="Print_Area"/></Cell>
    <Cell><Data ss:Type="Number">14574415</Data><NamedCell ss:Name="Print_Area"/></Cell>
   </Row>
   <Row>
    <Cell><Data ss:Type="String">YAR002W</Data><NamedCell ss:Name="Print_Area"/></Cell>
    <Cell><Data ss:Type="String">YDL229W</Data><NamedCell ss:Name="Print_Area"/></Cell>
    <Cell><Data ss:Type="String">affinitycapturems</Data><NamedCell
      ss:Name="Print_Area"/></Cell>
    <Cell><Data ss:Type="Number">11387327</Data><NamedCell ss:Name="Print_Area"/></Cell>
   </Row>
   <Row>
    <Cell><Data ss:Type="String">YAR002W</Data><NamedCell ss:Name="Print_Area"/></Cell>
    <Cell><Data ss:Type="String">YDL229W</Data><NamedCell ss:Name="Print_Area"/></Cell>
    <Cell><Data ss:Type="String">affinitycapturewestern</Data><NamedCell
      ss:Name="Print_Area"/></Cell>
    <Cell><Data ss:Type="Number">11535617</Data><NamedCell ss:Name="Print_Area"/></Cell>
   </Row>
   <Row>
    <Cell><Data ss:Type="String">YAR002W</Data><NamedCell ss:Name="Print_Area"/></Cell>
    <Cell><Data ss:Type="String">YDL229W</Data><NamedCell ss:Name="Print_Area"/></Cell>
    <Cell><Data ss:Type="String">reconstitutedcomplex</Data><NamedCell
      ss:Name="Print_Area"/></Cell>
    <Cell><Data ss:Type="Number">11387327</Data><NamedCell ss:Name="Print_Area"/></Cell>
   </Row>
   <Row>
    <Cell><Data ss:Type="String">YAR002W</Data><NamedCell ss:Name="Print_Area"/></Cell>
    <Cell><Data ss:Type="String">YDL229W</Data><NamedCell ss:Name="Print_Area"/></Cell>
    <Cell><Data ss:Type="String">reconstitutedcomplex</Data><NamedCell
      ss:Name="Print_Area"/></Cell>
    <Cell><Data ss:Type="Number">11535617</Data><NamedCell ss:Name="Print_Area"/></Cell>
   </Row>
   <Row>
    <Cell><Data ss:Type="String">YAR002W</Data><NamedCell ss:Name="Print_Area"/></Cell>
    <Cell><Data ss:Type="String">YER110C</Data><NamedCell ss:Name="Print_Area"/></Cell>
    <Cell><Data ss:Type="String">reconstitutedcomplex</Data><NamedCell
      ss:Name="Print_Area"/></Cell>
    <Cell><Data ss:Type="Number">11387327</Data><NamedCell ss:Name="Print_Area"/></Cell>
   </Row>
   <Row>
    <Cell><Data ss:Type="String">YAR002W</Data><NamedCell ss:Name="Print_Area"/></Cell>
    <Cell><Data ss:Type="String">YER110C</Data><NamedCell ss:Name="Print_Area"/></Cell>
    <Cell><Data ss:Type="String">affinitycapturems</Data><NamedCell
      ss:Name="Print_Area"/></Cell>
    <Cell><Data ss:Type="Number">16554755</Data><NamedCell ss:Name="Print_Area"/></Cell>
   </Row>
   <Row>
    <Cell><Data ss:Type="String">YAR002W</Data><NamedCell ss:Name="Print_Area"/></Cell>
    <Cell><Data ss:Type="String">YER110C</Data><NamedCell ss:Name="Print_Area"/></Cell>
    <Cell><Data ss:Type="String">affinitycapturewestern</Data><NamedCell
      ss:Name="Print_Area"/></Cell>
    <Cell><Data ss:Type="Number">11535617</Data><NamedCell ss:Name="Print_Area"/></Cell>
   </Row>
   <Row>
    <Cell><Data ss:Type="String">YAR002W</Data><NamedCell ss:Name="Print_Area"/></Cell>
    <Cell><Data ss:Type="String">YER110C</Data><NamedCell ss:Name="Print_Area"/></Cell>
    <Cell><Data ss:Type="String">affinitycapturems</Data><NamedCell
      ss:Name="Print_Area"/></Cell>
    <Cell><Data ss:Type="Number">11387327</Data><NamedCell ss:Name="Print_Area"/></Cell>
   </Row>
   <Row>
    <Cell><Data ss:Type="String">YAR002W</Data><NamedCell ss:Name="Print_Area"/></Cell>
    <Cell><Data ss:Type="String">YER110C</Data><NamedCell ss:Name="Print_Area"/></Cell>
    <Cell><Data ss:Type="String">affinitycapturems</Data><NamedCell
      ss:Name="Print_Area"/></Cell>
    <Cell><Data ss:Type="Number">16429126</Data><NamedCell ss:Name="Print_Area"/></Cell>
   </Row>
   <Row>
    <Cell><Data ss:Type="String">YAR002W</Data><NamedCell ss:Name="Print_Area"/></Cell>
    <Cell><Data ss:Type="String">YER110C</Data><NamedCell ss:Name="Print_Area"/></Cell>
    <Cell><Data ss:Type="String">reconstitutedcomplex</Data><NamedCell
      ss:Name="Print_Area"/></Cell>
    <Cell><Data ss:Type="Number">11535617</Data><NamedCell ss:Name="Print_Area"/></Cell>
   </Row>
   <Row>
    <Cell><Data ss:Type="String">YAR002W</Data><NamedCell ss:Name="Print_Area"/></Cell>
    <Cell><Data ss:Type="String">YER165W</Data><NamedCell ss:Name="Print_Area"/></Cell>
    <Cell><Data ss:Type="String">reconstitutedcomplex</Data><NamedCell
      ss:Name="Print_Area"/></Cell>
    <Cell><Data ss:Type="Number">11387327</Data><NamedCell ss:Name="Print_Area"/></Cell>
   </Row>
   <Row>
    <Cell><Data ss:Type="String">YAR002W</Data><NamedCell ss:Name="Print_Area"/></Cell>
    <Cell><Data ss:Type="String">YER165W</Data><NamedCell ss:Name="Print_Area"/></Cell>
    <Cell><Data ss:Type="String">reconstitutedcomplex</Data><NamedCell
      ss:Name="Print_Area"/></Cell>
    <Cell><Data ss:Type="Number">11535617</Data><NamedCell ss:Name="Print_Area"/></Cell>
   </Row>
   <Row>
    <Cell><Data ss:Type="String">YAR002W</Data><NamedCell ss:Name="Print_Area"/></Cell>
    <Cell><Data ss:Type="String">YER165W</Data><NamedCell ss:Name="Print_Area"/></Cell>
    <Cell><Data ss:Type="String">affinitycapturewestern</Data><NamedCell
      ss:Name="Print_Area"/></Cell>
    <Cell><Data ss:Type="Number">11535617</Data><NamedCell ss:Name="Print_Area"/></Cell>
   </Row>
   <Row>
    <Cell><Data ss:Type="String">YAR002W</Data><NamedCell ss:Name="Print_Area"/></Cell>
    <Cell><Data ss:Type="String">YER165W</Data><NamedCell ss:Name="Print_Area"/></Cell>
    <Cell><Data ss:Type="String">affinitycapturems</Data><NamedCell
      ss:Name="Print_Area"/></Cell>
    <Cell><Data ss:Type="Number">11387327</Data><NamedCell ss:Name="Print_Area"/></Cell>
   </Row>
   <Row>
    <Cell><Data ss:Type="String">YAR002W</Data><NamedCell ss:Name="Print_Area"/></Cell>
    <Cell><Data ss:Type="String">YLR293C</Data><NamedCell ss:Name="Print_Area"/></Cell>
    <Cell><Data ss:Type="String">reconstitutedcomplex</Data><NamedCell
      ss:Name="Print_Area"/></Cell>
    <Cell><Data ss:Type="Number">11535617</Data><NamedCell ss:Name="Print_Area"/></Cell>
   </Row>
   <Row>
    <Cell><Data ss:Type="String">YAR002W</Data><NamedCell ss:Name="Print_Area"/></Cell>
    <Cell><Data ss:Type="String">YLR293C</Data><NamedCell ss:Name="Print_Area"/></Cell>
    <Cell><Data ss:Type="String">affinitycapturewestern</Data><NamedCell
      ss:Name="Print_Area"/></Cell>
    <Cell><Data ss:Type="Number">11535617</Data><NamedCell ss:Name="Print_Area"/></Cell>
   </Row>
   <Row>
    <Cell><Data ss:Type="String">YAR002W</Data><NamedCell ss:Name="Print_Area"/></Cell>
    <Cell><Data ss:Type="String">YLR335W</Data><NamedCell ss:Name="Print_Area"/></Cell>
    <Cell><Data ss:Type="String">affinitycapturewestern</Data><NamedCell
      ss:Name="Print_Area"/></Cell>
    <Cell><Data ss:Type="Number">11425876</Data><NamedCell ss:Name="Print_Area"/></Cell>
   </Row>
   <Row>
    <Cell><Data ss:Type="String">YAR002W</Data><NamedCell ss:Name="Print_Area"/></Cell>
    <Cell><Data ss:Type="String">YLR335W</Data><NamedCell ss:Name="Print_Area"/></Cell>
    <Cell><Data ss:Type="String">reconstitutedcomplex</Data><NamedCell
      ss:Name="Print_Area"/></Cell>
    <Cell><Data ss:Type="Number">11535617</Data><NamedCell ss:Name="Print_Area"/></Cell>
   </Row>
   <Row>
    <Cell><Data ss:Type="String">YAR002W</Data><NamedCell ss:Name="Print_Area"/></Cell>
    <Cell><Data ss:Type="String">YLR335W</Data><NamedCell ss:Name="Print_Area"/></Cell>
    <Cell><Data ss:Type="String">reconstitutedcomplex</Data><NamedCell
      ss:Name="Print_Area"/></Cell>
    <Cell><Data ss:Type="Number">11387327</Data><NamedCell ss:Name="Print_Area"/></Cell>
   </Row>
   <Row>
    <Cell><Data ss:Type="String">YAR002W</Data><NamedCell ss:Name="Print_Area"/></Cell>
    <Cell><Data ss:Type="String">YLR335W</Data><NamedCell ss:Name="Print_Area"/></Cell>
    <Cell><Data ss:Type="String">affinitycapturewestern</Data><NamedCell
      ss:Name="Print_Area"/></Cell>
    <Cell><Data ss:Type="Number">11535617</Data><NamedCell ss:Name="Print_Area"/></Cell>
   </Row>
   <Row>
    <Cell><Data ss:Type="String">YAR002W</Data><NamedCell ss:Name="Print_Area"/></Cell>
    <Cell><Data ss:Type="String">YLR335W</Data><NamedCell ss:Name="Print_Area"/></Cell>
    <Cell><Data ss:Type="String">affinitycapturems</Data><NamedCell
      ss:Name="Print_Area"/></Cell>
    <Cell><Data ss:Type="Number">11387327</Data><NamedCell ss:Name="Print_Area"/></Cell>
   </Row>
   <Row>
    <Cell><Data ss:Type="String">YAR002W</Data><NamedCell ss:Name="Print_Area"/></Cell>
    <Cell><Data ss:Type="String">YLR335W</Data><NamedCell ss:Name="Print_Area"/></Cell>
    <Cell><Data ss:Type="String">affinitycapturems</Data><NamedCell
      ss:Name="Print_Area"/></Cell>
    <Cell><Data ss:Type="Number">16429126</Data><NamedCell ss:Name="Print_Area"/></Cell>
   </Row>
   <Row>
    <Cell><Data ss:Type="String">YAR002W</Data><NamedCell ss:Name="Print_Area"/></Cell>
    <Cell><Data ss:Type="String">YLR335W</Data><NamedCell ss:Name="Print_Area"/></Cell>
    <Cell><Data ss:Type="String">affinitycapturems</Data><NamedCell
      ss:Name="Print_Area"/></Cell>
    <Cell><Data ss:Type="Number">16554755</Data><NamedCell ss:Name="Print_Area"/></Cell>
   </Row>
   <Row>
    <Cell><Data ss:Type="String">YAR002W</Data><NamedCell ss:Name="Print_Area"/></Cell>
    <Cell><Data ss:Type="String">YLR347C</Data><NamedCell ss:Name="Print_Area"/></Cell>
    <Cell><Data ss:Type="String">affinitycapturems</Data><NamedCell
      ss:Name="Print_Area"/></Cell>
    <Cell><Data ss:Type="Number">11387327</Data><NamedCell ss:Name="Print_Area"/></Cell>
   </Row>
   <Row>
    <Cell><Data ss:Type="String">YAR002W</Data><NamedCell ss:Name="Print_Area"/></Cell>
    <Cell><Data ss:Type="String">YLR347C</Data><NamedCell ss:Name="Print_Area"/></Cell>
    <Cell><Data ss:Type="String">reconstitutedcomplex</Data><NamedCell
      ss:Name="Print_Area"/></Cell>
    <Cell><Data ss:Type="Number">11387327</Data><NamedCell ss:Name="Print_Area"/></Cell>
   </Row>
   <Row>
    <Cell><Data ss:Type="String">YAR002W</Data><NamedCell ss:Name="Print_Area"/></Cell>
    <Cell><Data ss:Type="String">YLR347C</Data><NamedCell ss:Name="Print_Area"/></Cell>
    <Cell><Data ss:Type="String">affinitycapturewestern</Data><NamedCell
      ss:Name="Print_Area"/></Cell>
    <Cell><Data ss:Type="Number">11535617</Data><NamedCell ss:Name="Print_Area"/></Cell>
   </Row>
   <Row>
    <Cell><Data ss:Type="String">YAR002W</Data><NamedCell ss:Name="Print_Area"/></Cell>
    <Cell><Data ss:Type="String">YLR347C</Data><NamedCell ss:Name="Print_Area"/></Cell>
    <Cell><Data ss:Type="String">affinitycapturems</Data><NamedCell
      ss:Name="Print_Area"/></Cell>
    <Cell><Data ss:Type="Number">16429126</Data><NamedCell ss:Name="Print_Area"/></Cell>
   </Row>
   <Row>
    <Cell><Data ss:Type="String">YAR002W</Data><NamedCell ss:Name="Print_Area"/></Cell>
    <Cell><Data ss:Type="String">YLR347C</Data><NamedCell ss:Name="Print_Area"/></Cell>
    <Cell><Data ss:Type="String">reconstitutedcomplex</Data><NamedCell
      ss:Name="Print_Area"/></Cell>
    <Cell><Data ss:Type="Number">11535617</Data><NamedCell ss:Name="Print_Area"/></Cell>
   </Row>
   <Row>
    <Cell><Data ss:Type="String">YAR002W</Data><NamedCell ss:Name="Print_Area"/></Cell>
    <Cell><Data ss:Type="String">YLR347C</Data><NamedCell ss:Name="Print_Area"/></Cell>
    <Cell><Data ss:Type="String">affinitycapturewestern</Data><NamedCell
      ss:Name="Print_Area"/></Cell>
    <Cell><Data ss:Type="Number">11425876</Data><NamedCell ss:Name="Print_Area"/></Cell>
   </Row>
   <Row>
    <Cell><Data ss:Type="String">YAR002W</Data><NamedCell ss:Name="Print_Area"/></Cell>
    <Cell><Data ss:Type="String">YLR347C</Data><NamedCell ss:Name="Print_Area"/></Cell>
    <Cell><Data ss:Type="String">affinitycapturems</Data><NamedCell
      ss:Name="Print_Area"/></Cell>
    <Cell><Data ss:Type="Number">16554755</Data><NamedCell ss:Name="Print_Area"/></Cell>
   </Row>
   <Row>
    <Cell><Data ss:Type="String">YAR002W</Data><NamedCell ss:Name="Print_Area"/></Cell>
    <Cell><Data ss:Type="String">YLR347C</Data><NamedCell ss:Name="Print_Area"/></Cell>
    <Cell><Data ss:Type="String">affinitycapturems</Data><NamedCell
      ss:Name="Print_Area"/></Cell>
    <Cell><Data ss:Type="Number">11805826</Data><NamedCell ss:Name="Print_Area"/></Cell>
   </Row>
   <Row>
    <Cell><Data ss:Type="String">YAR002W</Data><NamedCell ss:Name="Print_Area"/></Cell>
    <Cell><Data ss:Type="String">YMR047C</Data><NamedCell ss:Name="Print_Area"/></Cell>
    <Cell><Data ss:Type="String">affinitycapturems</Data><NamedCell
      ss:Name="Print_Area"/></Cell>
    <Cell><Data ss:Type="Number">11387327</Data><NamedCell ss:Name="Print_Area"/></Cell>
   </Row>
   <Row>
    <Cell><Data ss:Type="String">YAR002W</Data><NamedCell ss:Name="Print_Area"/></Cell>
    <Cell><Data ss:Type="String">YMR047C</Data><NamedCell ss:Name="Print_Area"/></Cell>
    <Cell><Data ss:Type="String">reconstitutedcomplex</Data><NamedCell
      ss:Name="Print_Area"/></Cell>
    <Cell><Data ss:Type="Number">11387327</Data><NamedCell ss:Name="Print_Area"/></Cell>
   </Row>
   <Row>
    <Cell><Data ss:Type="String">YAR002W</Data><NamedCell ss:Name="Print_Area"/></Cell>
    <Cell><Data ss:Type="String">YNL189W</Data><NamedCell ss:Name="Print_Area"/></Cell>
    <Cell><Data ss:Type="String">affinitycapturems</Data><NamedCell
      ss:Name="Print_Area"/></Cell>
    <Cell><Data ss:Type="Number">11805826</Data><NamedCell ss:Name="Print_Area"/></Cell>
   </Row>
   <Row>
    <Cell><Data ss:Type="String">YAR002W</Data><NamedCell ss:Name="Print_Area"/></Cell>
    <Cell><Data ss:Type="String">YNL189W</Data><NamedCell ss:Name="Print_Area"/></Cell>
    <Cell><Data ss:Type="String">reconstitutedcomplex</Data><NamedCell
      ss:Name="Print_Area"/></Cell>
    <Cell><Data ss:Type="Number">11535617</Data><NamedCell ss:Name="Print_Area"/></Cell>
   </Row>
   <Row>
    <Cell><Data ss:Type="String">YAR002W</Data><NamedCell ss:Name="Print_Area"/></Cell>
    <Cell><Data ss:Type="String">YNL189W</Data><NamedCell ss:Name="Print_Area"/></Cell>
    <Cell><Data ss:Type="String">affinitycapturewestern</Data><NamedCell
      ss:Name="Print_Area"/></Cell>
    <Cell><Data ss:Type="Number">11425876</Data><NamedCell ss:Name="Print_Area"/></Cell>
   </Row>
   <Row>
    <Cell><Data ss:Type="String">YAR002W</Data><NamedCell ss:Name="Print_Area"/></Cell>
    <Cell><Data ss:Type="String">YNL189W</Data><NamedCell ss:Name="Print_Area"/></Cell>
    <Cell><Data ss:Type="String">affinitycapturems</Data><NamedCell
      ss:Name="Print_Area"/></Cell>
    <Cell><Data ss:Type="Number">11387327</Data><NamedCell ss:Name="Print_Area"/></Cell>
   </Row>
   <Row>
    <Cell><Data ss:Type="String">YAR002W</Data><NamedCell ss:Name="Print_Area"/></Cell>
    <Cell><Data ss:Type="String">YNL189W</Data><NamedCell ss:Name="Print_Area"/></Cell>
    <Cell><Data ss:Type="String">reconstitutedcomplex</Data><NamedCell
      ss:Name="Print_Area"/></Cell>
    <Cell><Data ss:Type="Number">11387327</Data><NamedCell ss:Name="Print_Area"/></Cell>
   </Row>
   <Row>
    <Cell><Data ss:Type="String">YAR002W</Data><NamedCell ss:Name="Print_Area"/></Cell>
    <Cell><Data ss:Type="String">YNL189W</Data><NamedCell ss:Name="Print_Area"/></Cell>
    <Cell><Data ss:Type="String">affinitycapturems</Data><NamedCell
      ss:Name="Print_Area"/></Cell>
    <Cell><Data ss:Type="Number">11805837</Data><NamedCell ss:Name="Print_Area"/></Cell>
   </Row>
   <Row>
    <Cell><Data ss:Type="String">YAR002W</Data><NamedCell ss:Name="Print_Area"/></Cell>
    <Cell><Data ss:Type="String">YNL189W</Data><NamedCell ss:Name="Print_Area"/></Cell>
    <Cell><Data ss:Type="String">affinitycapturewestern</Data><NamedCell
      ss:Name="Print_Area"/></Cell>
    <Cell><Data ss:Type="Number">11535617</Data><NamedCell ss:Name="Print_Area"/></Cell>
   </Row>
   <Row>
    <Cell><Data ss:Type="String">YAR003W</Data><NamedCell ss:Name="Print_Area"/></Cell>
    <Cell><Data ss:Type="String">YBR175W</Data><NamedCell ss:Name="Print_Area"/></Cell>
    <Cell><Data ss:Type="String">affinitycapturewestern</Data><NamedCell
      ss:Name="Print_Area"/></Cell>
    <Cell><Data ss:Type="Number">11742990</Data><NamedCell ss:Name="Print_Area"/></Cell>
   </Row>
   <Row>
    <Cell><Data ss:Type="String">YAR003W</Data><NamedCell ss:Name="Print_Area"/></Cell>
    <Cell><Data ss:Type="String">YBR175W</Data><NamedCell ss:Name="Print_Area"/></Cell>
    <Cell><Data ss:Type="String">affinitycapturems</Data><NamedCell
      ss:Name="Print_Area"/></Cell>
    <Cell><Data ss:Type="Number">16554755</Data><NamedCell ss:Name="Print_Area"/></Cell>
   </Row>
   <Row>
    <Cell><Data ss:Type="String">YAR003W</Data><NamedCell ss:Name="Print_Area"/></Cell>
    <Cell><Data ss:Type="String">YBR175W</Data><NamedCell ss:Name="Print_Area"/></Cell>
    <Cell><Data ss:Type="String">affinitycapturems</Data><NamedCell
      ss:Name="Print_Area"/></Cell>
    <Cell><Data ss:Type="Number">11742990</Data><NamedCell ss:Name="Print_Area"/></Cell>
   </Row>
   <Row>
    <Cell><Data ss:Type="String">YAR003W</Data><NamedCell ss:Name="Print_Area"/></Cell>
    <Cell><Data ss:Type="String">YBR175W</Data><NamedCell ss:Name="Print_Area"/></Cell>
    <Cell><Data ss:Type="String">affinitycapturems</Data><NamedCell
      ss:Name="Print_Area"/></Cell>
    <Cell><Data ss:Type="Number">11805826</Data><NamedCell ss:Name="Print_Area"/></Cell>
   </Row>
   <Row>
    <Cell><Data ss:Type="String">YAR003W</Data><NamedCell ss:Name="Print_Area"/></Cell>
    <Cell><Data ss:Type="String">YBR175W</Data><NamedCell ss:Name="Print_Area"/></Cell>
    <Cell><Data ss:Type="String">affinitycapturems</Data><NamedCell
      ss:Name="Print_Area"/></Cell>
    <Cell><Data ss:Type="Number">16429126</Data><NamedCell ss:Name="Print_Area"/></Cell>
   </Row>
   <Row>
    <Cell><Data ss:Type="String">YAR003W</Data><NamedCell ss:Name="Print_Area"/></Cell>
    <Cell><Data ss:Type="String">YBR175W</Data><NamedCell ss:Name="Print_Area"/></Cell>
    <Cell><Data ss:Type="String">twohybrid</Data><NamedCell ss:Name="Print_Area"/></Cell>
    <Cell><Data ss:Type="Number">10688190</Data><NamedCell ss:Name="Print_Area"/></Cell>
   </Row>
   <Row>
    <Cell><Data ss:Type="String">YAR003W</Data><NamedCell ss:Name="Print_Area"/></Cell>
    <Cell><Data ss:Type="String">YBR258C</Data><NamedCell ss:Name="Print_Area"/></Cell>
    <Cell><Data ss:Type="String">affinitycapturewestern</Data><NamedCell
      ss:Name="Print_Area"/></Cell>
    <Cell><Data ss:Type="Number">11742990</Data><NamedCell ss:Name="Print_Area"/></Cell>
   </Row>
   <Row>
    <Cell><Data ss:Type="String">YAR003W</Data><NamedCell ss:Name="Print_Area"/></Cell>
    <Cell><Data ss:Type="String">YBR258C</Data><NamedCell ss:Name="Print_Area"/></Cell>
    <Cell><Data ss:Type="String">affinitycapturems</Data><NamedCell
      ss:Name="Print_Area"/></Cell>
    <Cell><Data ss:Type="Number">11742990</Data><NamedCell ss:Name="Print_Area"/></Cell>
   </Row>
   <Row>
    <Cell><Data ss:Type="String">YAR003W</Data><NamedCell ss:Name="Print_Area"/></Cell>
    <Cell><Data ss:Type="String">YDR469W</Data><NamedCell ss:Name="Print_Area"/></Cell>
    <Cell><Data ss:Type="String">affinitycapturems</Data><NamedCell
      ss:Name="Print_Area"/></Cell>
    <Cell><Data ss:Type="Number">11742990</Data><NamedCell ss:Name="Print_Area"/></Cell>
   </Row>
   <Row>
    <Cell><Data ss:Type="String">YAR003W</Data><NamedCell ss:Name="Print_Area"/></Cell>
    <Cell><Data ss:Type="String">YDR469W</Data><NamedCell ss:Name="Print_Area"/></Cell>
    <Cell><Data ss:Type="String">affinitycapturems</Data><NamedCell
      ss:Name="Print_Area"/></Cell>
    <Cell><Data ss:Type="Number">16429126</Data><NamedCell ss:Name="Print_Area"/></Cell>
   </Row>
   <Row>
    <Cell><Data ss:Type="String">YAR003W</Data><NamedCell ss:Name="Print_Area"/></Cell>
    <Cell><Data ss:Type="String">YDR469W</Data><NamedCell ss:Name="Print_Area"/></Cell>
    <Cell><Data ss:Type="String">affinitycapturewestern</Data><NamedCell
      ss:Name="Print_Area"/></Cell>
    <Cell><Data ss:Type="Number">11742990</Data><NamedCell ss:Name="Print_Area"/></Cell>
   </Row>
   <Row>
    <Cell><Data ss:Type="String">YAR003W</Data><NamedCell ss:Name="Print_Area"/></Cell>
    <Cell><Data ss:Type="String">YDR469W</Data><NamedCell ss:Name="Print_Area"/></Cell>
    <Cell><Data ss:Type="String">affinitycapturems</Data><NamedCell
      ss:Name="Print_Area"/></Cell>
    <Cell><Data ss:Type="Number">16554755</Data><NamedCell ss:Name="Print_Area"/></Cell>
   </Row>
   <Row>
    <Cell><Data ss:Type="String">YAR003W</Data><NamedCell ss:Name="Print_Area"/></Cell>
    <Cell><Data ss:Type="String">YDR469W</Data><NamedCell ss:Name="Print_Area"/></Cell>
    <Cell><Data ss:Type="String">affinitycapturems</Data><NamedCell
      ss:Name="Print_Area"/></Cell>
    <Cell><Data ss:Type="Number">11805826</Data><NamedCell ss:Name="Print_Area"/></Cell>
   </Row>
   <Row>
    <Cell><Data ss:Type="String">YAR003W</Data><NamedCell ss:Name="Print_Area"/></Cell>
    <Cell><Data ss:Type="String">YHR119W</Data><NamedCell ss:Name="Print_Area"/></Cell>
    <Cell><Data ss:Type="String">affinitycapturems</Data><NamedCell
      ss:Name="Print_Area"/></Cell>
    <Cell><Data ss:Type="Number">16554755</Data><NamedCell ss:Name="Print_Area"/></Cell>
   </Row>
   <Row>
    <Cell><Data ss:Type="String">YAR003W</Data><NamedCell ss:Name="Print_Area"/></Cell>
    <Cell><Data ss:Type="String">YHR119W</Data><NamedCell ss:Name="Print_Area"/></Cell>
    <Cell><Data ss:Type="String">affinitycapturems</Data><NamedCell
      ss:Name="Print_Area"/></Cell>
    <Cell><Data ss:Type="Number">16429126</Data><NamedCell ss:Name="Print_Area"/></Cell>
   </Row>
   <Row>
    <Cell><Data ss:Type="String">YAR003W</Data><NamedCell ss:Name="Print_Area"/></Cell>
    <Cell><Data ss:Type="String">YHR119W</Data><NamedCell ss:Name="Print_Area"/></Cell>
    <Cell><Data ss:Type="String">affinitycapturems</Data><NamedCell
      ss:Name="Print_Area"/></Cell>
    <Cell><Data ss:Type="Number">11687631</Data><NamedCell ss:Name="Print_Area"/></Cell>
   </Row>
   <Row>
    <Cell><Data ss:Type="String">YAR003W</Data><NamedCell ss:Name="Print_Area"/></Cell>
    <Cell><Data ss:Type="String">YHR119W</Data><NamedCell ss:Name="Print_Area"/></Cell>
    <Cell><Data ss:Type="String">affinitycapturewestern</Data><NamedCell
      ss:Name="Print_Area"/></Cell>
    <Cell><Data ss:Type="Number">11742990</Data><NamedCell ss:Name="Print_Area"/></Cell>
   </Row>
   <Row>
    <Cell><Data ss:Type="String">YAR003W</Data><NamedCell ss:Name="Print_Area"/></Cell>
    <Cell><Data ss:Type="String">YHR119W</Data><NamedCell ss:Name="Print_Area"/></Cell>
    <Cell><Data ss:Type="String">copurification</Data><NamedCell
      ss:Name="Print_Area"/></Cell>
    <Cell><Data ss:Type="Number">11687631</Data><NamedCell ss:Name="Print_Area"/></Cell>
   </Row>
   <Row>
    <Cell><Data ss:Type="String">YAR003W</Data><NamedCell ss:Name="Print_Area"/></Cell>
    <Cell><Data ss:Type="String">YHR119W</Data><NamedCell ss:Name="Print_Area"/></Cell>
    <Cell><Data ss:Type="String">affinitycapturewestern</Data><NamedCell
      ss:Name="Print_Area"/></Cell>
    <Cell><Data ss:Type="Number">11752412</Data><NamedCell ss:Name="Print_Area"/></Cell>
   </Row>
   <Row>
    <Cell><Data ss:Type="String">YAR003W</Data><NamedCell ss:Name="Print_Area"/></Cell>
    <Cell><Data ss:Type="String">YHR119W</Data><NamedCell ss:Name="Print_Area"/></Cell>
    <Cell><Data ss:Type="String">affinitycapturems</Data><NamedCell
      ss:Name="Print_Area"/></Cell>
    <Cell><Data ss:Type="Number">11805826</Data><NamedCell ss:Name="Print_Area"/></Cell>
   </Row>
   <Row>
    <Cell><Data ss:Type="String">YAR003W</Data><NamedCell ss:Name="Print_Area"/></Cell>
    <Cell><Data ss:Type="String">YHR119W</Data><NamedCell ss:Name="Print_Area"/></Cell>
    <Cell><Data ss:Type="String">affinitycapturems</Data><NamedCell
      ss:Name="Print_Area"/></Cell>
    <Cell><Data ss:Type="Number">11742990</Data><NamedCell ss:Name="Print_Area"/></Cell>
   </Row>
   <Row>
    <Cell><Data ss:Type="String">YAR003W</Data><NamedCell ss:Name="Print_Area"/></Cell>
    <Cell><Data ss:Type="String">YKL018W</Data><NamedCell ss:Name="Print_Area"/></Cell>
    <Cell><Data ss:Type="String">affinitycapturems</Data><NamedCell
      ss:Name="Print_Area"/></Cell>
    <Cell><Data ss:Type="Number">16429126</Data><NamedCell ss:Name="Print_Area"/></Cell>
   </Row>
   <Row>
    <Cell><Data ss:Type="String">YAR003W</Data><NamedCell ss:Name="Print_Area"/></Cell>
    <Cell><Data ss:Type="String">YKL018W</Data><NamedCell ss:Name="Print_Area"/></Cell>
    <Cell><Data ss:Type="String">affinitycapturems</Data><NamedCell
      ss:Name="Print_Area"/></Cell>
    <Cell><Data ss:Type="Number">11742990</Data><NamedCell ss:Name="Print_Area"/></Cell>
   </Row>
   <Row>
    <Cell><Data ss:Type="String">YAR003W</Data><NamedCell ss:Name="Print_Area"/></Cell>
    <Cell><Data ss:Type="String">YKL018W</Data><NamedCell ss:Name="Print_Area"/></Cell>
    <Cell><Data ss:Type="String">affinitycapturewestern</Data><NamedCell
      ss:Name="Print_Area"/></Cell>
    <Cell><Data ss:Type="Number">11742990</Data><NamedCell ss:Name="Print_Area"/></Cell>
   </Row>
   <Row>
    <Cell><Data ss:Type="String">YAR003W</Data><NamedCell ss:Name="Print_Area"/></Cell>
    <Cell><Data ss:Type="String">YLR015W</Data><NamedCell ss:Name="Print_Area"/></Cell>
    <Cell><Data ss:Type="String">affinitycapturems</Data><NamedCell
      ss:Name="Print_Area"/></Cell>
    <Cell><Data ss:Type="Number">11687631</Data><NamedCell ss:Name="Print_Area"/></Cell>
   </Row>
   <Row>
    <Cell><Data ss:Type="String">YAR003W</Data><NamedCell ss:Name="Print_Area"/></Cell>
    <Cell><Data ss:Type="String">YLR015W</Data><NamedCell ss:Name="Print_Area"/></Cell>
    <Cell><Data ss:Type="String">affinitycapturewestern</Data><NamedCell
      ss:Name="Print_Area"/></Cell>
    <Cell><Data ss:Type="Number">11742990</Data><NamedCell ss:Name="Print_Area"/></Cell>
   </Row>
   <Row>
    <Cell><Data ss:Type="String">YAR003W</Data><NamedCell ss:Name="Print_Area"/></Cell>
    <Cell><Data ss:Type="String">YLR015W</Data><NamedCell ss:Name="Print_Area"/></Cell>
    <Cell><Data ss:Type="String">affinitycapturems</Data><NamedCell
      ss:Name="Print_Area"/></Cell>
    <Cell><Data ss:Type="Number">11742990</Data><NamedCell ss:Name="Print_Area"/></Cell>
   </Row>
   <Row>
    <Cell><Data ss:Type="String">YAR003W</Data><NamedCell ss:Name="Print_Area"/></Cell>
    <Cell><Data ss:Type="String">YLR015W</Data><NamedCell ss:Name="Print_Area"/></Cell>
    <Cell><Data ss:Type="String">affinitycapturems</Data><NamedCell
      ss:Name="Print_Area"/></Cell>
    <Cell><Data ss:Type="Number">16554755</Data><NamedCell ss:Name="Print_Area"/></Cell>
   </Row>
   <Row>
    <Cell><Data ss:Type="String">YAR003W</Data><NamedCell ss:Name="Print_Area"/></Cell>
    <Cell><Data ss:Type="String">YLR015W</Data><NamedCell ss:Name="Print_Area"/></Cell>
    <Cell><Data ss:Type="String">affinitycapturems</Data><NamedCell
      ss:Name="Print_Area"/></Cell>
    <Cell><Data ss:Type="Number">16429126</Data><NamedCell ss:Name="Print_Area"/></Cell>
   </Row>
   <Row>
    <Cell><Data ss:Type="String">YAR003W</Data><NamedCell ss:Name="Print_Area"/></Cell>
    <Cell><Data ss:Type="String">YLR015W</Data><NamedCell ss:Name="Print_Area"/></Cell>
    <Cell><Data ss:Type="String">affinitycapturems</Data><NamedCell
      ss:Name="Print_Area"/></Cell>
    <Cell><Data ss:Type="Number">11805826</Data><NamedCell ss:Name="Print_Area"/></Cell>
   </Row>
   <Row>
    <Cell><Data ss:Type="String">YAR003W</Data><NamedCell ss:Name="Print_Area"/></Cell>
    <Cell><Data ss:Type="String">YPL138C</Data><NamedCell ss:Name="Print_Area"/></Cell>
    <Cell><Data ss:Type="String">affinitycapturewestern</Data><NamedCell
      ss:Name="Print_Area"/></Cell>
    <Cell><Data ss:Type="Number">11742990</Data><NamedCell ss:Name="Print_Area"/></Cell>
   </Row>
   <Row>
    <Cell><Data ss:Type="String">YAR003W</Data><NamedCell ss:Name="Print_Area"/></Cell>
    <Cell><Data ss:Type="String">YPL138C</Data><NamedCell ss:Name="Print_Area"/></Cell>
    <Cell><Data ss:Type="String">affinitycapturems</Data><NamedCell
      ss:Name="Print_Area"/></Cell>
    <Cell><Data ss:Type="Number">11805826</Data><NamedCell ss:Name="Print_Area"/></Cell>
   </Row>
   <Row>
    <Cell><Data ss:Type="String">YAR003W</Data><NamedCell ss:Name="Print_Area"/></Cell>
    <Cell><Data ss:Type="String">YPL138C</Data><NamedCell ss:Name="Print_Area"/></Cell>
    <Cell><Data ss:Type="String">affinitycapturems</Data><NamedCell
      ss:Name="Print_Area"/></Cell>
    <Cell><Data ss:Type="Number">16554755</Data><NamedCell ss:Name="Print_Area"/></Cell>
   </Row>
   <Row>
    <Cell><Data ss:Type="String">YAR003W</Data><NamedCell ss:Name="Print_Area"/></Cell>
    <Cell><Data ss:Type="String">YPL138C</Data><NamedCell ss:Name="Print_Area"/></Cell>
    <Cell><Data ss:Type="String">affinitycapturems</Data><NamedCell
      ss:Name="Print_Area"/></Cell>
    <Cell><Data ss:Type="Number">11742990</Data><NamedCell ss:Name="Print_Area"/></Cell>
   </Row>
   <Row>
    <Cell><Data ss:Type="String">YAR003W</Data><NamedCell ss:Name="Print_Area"/></Cell>
    <Cell><Data ss:Type="String">YPL138C</Data><NamedCell ss:Name="Print_Area"/></Cell>
    <Cell><Data ss:Type="String">affinitycapturems</Data><NamedCell
      ss:Name="Print_Area"/></Cell>
    <Cell><Data ss:Type="Number">16429126</Data><NamedCell ss:Name="Print_Area"/></Cell>
   </Row>
   <Row>
    <Cell><Data ss:Type="String">YAR007C</Data><NamedCell ss:Name="Print_Area"/></Cell>
    <Cell><Data ss:Type="String">YBL023C</Data><NamedCell ss:Name="Print_Area"/></Cell>
    <Cell><Data ss:Type="String">affinitycapturewestern</Data><NamedCell
      ss:Name="Print_Area"/></Cell>
    <Cell><Data ss:Type="Number">10757793</Data><NamedCell ss:Name="Print_Area"/></Cell>
   </Row>
   <Row>
    <Cell><Data ss:Type="String">YAR007C</Data><NamedCell ss:Name="Print_Area"/></Cell>
    <Cell><Data ss:Type="String">YBR136W</Data><NamedCell ss:Name="Print_Area"/></Cell>
    <Cell><Data ss:Type="String">biochemicalactivity</Data><NamedCell
      ss:Name="Print_Area"/></Cell>
    <Cell><Data ss:Type="Number">14642562</Data><NamedCell ss:Name="Print_Area"/></Cell>
   </Row>
   <Row>
    <Cell><Data ss:Type="String">YAR007C</Data><NamedCell ss:Name="Print_Area"/></Cell>
    <Cell><Data ss:Type="String">YBR136W</Data><NamedCell ss:Name="Print_Area"/></Cell>
    <Cell><Data ss:Type="String">affinitycapturewestern</Data><NamedCell
      ss:Name="Print_Area"/></Cell>
    <Cell><Data ss:Type="Number">14642562</Data><NamedCell ss:Name="Print_Area"/></Cell>
   </Row>
   <Row>
    <Cell><Data ss:Type="String">YAR007C</Data><NamedCell ss:Name="Print_Area"/></Cell>
    <Cell><Data ss:Type="String">YBR136W</Data><NamedCell ss:Name="Print_Area"/></Cell>
    <Cell><Data ss:Type="String">affinitycapturems</Data><NamedCell
      ss:Name="Print_Area"/></Cell>
    <Cell><Data ss:Type="Number">16429126</Data><NamedCell ss:Name="Print_Area"/></Cell>
   </Row>
   <Row>
    <Cell><Data ss:Type="String">YAR007C</Data><NamedCell ss:Name="Print_Area"/></Cell>
    <Cell><Data ss:Type="String">YBR136W</Data><NamedCell ss:Name="Print_Area"/></Cell>
    <Cell><Data ss:Type="String">biochemicalactivity</Data><NamedCell
      ss:Name="Print_Area"/></Cell>
    <Cell><Data ss:Type="Number">12967660</Data><NamedCell ss:Name="Print_Area"/></Cell>
   </Row>
   <Row>
    <Cell><Data ss:Type="String">YAR007C</Data><NamedCell ss:Name="Print_Area"/></Cell>
    <Cell><Data ss:Type="String">YBR136W</Data><NamedCell ss:Name="Print_Area"/></Cell>
    <Cell><Data ss:Type="String">affinitycapturems</Data><NamedCell
      ss:Name="Print_Area"/></Cell>
    <Cell><Data ss:Type="Number">11805826</Data><NamedCell ss:Name="Print_Area"/></Cell>
   </Row>
   <Row>
    <Cell><Data ss:Type="String">YAR007C</Data><NamedCell ss:Name="Print_Area"/></Cell>
    <Cell><Data ss:Type="String">YBR136W</Data><NamedCell ss:Name="Print_Area"/></Cell>
    <Cell><Data ss:Type="String">affinitycapturewestern</Data><NamedCell
      ss:Name="Print_Area"/></Cell>
    <Cell><Data ss:Type="Number">16148046</Data><NamedCell ss:Name="Print_Area"/></Cell>
   </Row>
   <Row>
    <Cell><Data ss:Type="String">YAR007C</Data><NamedCell ss:Name="Print_Area"/></Cell>
    <Cell><Data ss:Type="String">YBR136W</Data><NamedCell ss:Name="Print_Area"/></Cell>
    <Cell><Data ss:Type="String">twohybrid</Data><NamedCell ss:Name="Print_Area"/></Cell>
    <Cell><Data ss:Type="Number">16148046</Data><NamedCell ss:Name="Print_Area"/></Cell>
   </Row>
   <Row>
    <Cell><Data ss:Type="String">YAR007C</Data><NamedCell ss:Name="Print_Area"/></Cell>
    <Cell><Data ss:Type="String">YBR136W</Data><NamedCell ss:Name="Print_Area"/></Cell>
    <Cell><Data ss:Type="String">reconstitutedcomplex</Data><NamedCell
      ss:Name="Print_Area"/></Cell>
    <Cell><Data ss:Type="Number">14642562</Data><NamedCell ss:Name="Print_Area"/></Cell>
   </Row>
   <Row>
    <Cell><Data ss:Type="String">YAR007C</Data><NamedCell ss:Name="Print_Area"/></Cell>
    <Cell><Data ss:Type="String">YHR164C</Data><NamedCell ss:Name="Print_Area"/></Cell>
    <Cell><Data ss:Type="String">affinitycapturems</Data><NamedCell
      ss:Name="Print_Area"/></Cell>
    <Cell><Data ss:Type="Number">11805826</Data><NamedCell ss:Name="Print_Area"/></Cell>
   </Row>
   <Row>
    <Cell><Data ss:Type="String">YAR007C</Data><NamedCell ss:Name="Print_Area"/></Cell>
    <Cell><Data ss:Type="String">YHR164C</Data><NamedCell ss:Name="Print_Area"/></Cell>
    <Cell><Data ss:Type="String">affinitycapturems</Data><NamedCell
      ss:Name="Print_Area"/></Cell>
    <Cell><Data ss:Type="Number">16429126</Data><NamedCell ss:Name="Print_Area"/></Cell>
   </Row>
   <Row>
    <Cell><Data ss:Type="String">YAR007C</Data><NamedCell ss:Name="Print_Area"/></Cell>
    <Cell><Data ss:Type="String">YHR164C</Data><NamedCell ss:Name="Print_Area"/></Cell>
    <Cell><Data ss:Type="String">twohybrid</Data><NamedCell ss:Name="Print_Area"/></Cell>
    <Cell><Data ss:Type="Number">12799426</Data><NamedCell ss:Name="Print_Area"/></Cell>
   </Row>
   <Row>
    <Cell><Data ss:Type="String">YAR007C</Data><NamedCell ss:Name="Print_Area"/></Cell>
    <Cell><Data ss:Type="String">YHR164C</Data><NamedCell ss:Name="Print_Area"/></Cell>
    <Cell><Data ss:Type="String">reconstitutedcomplex</Data><NamedCell
      ss:Name="Print_Area"/></Cell>
    <Cell><Data ss:Type="Number">12799426</Data><NamedCell ss:Name="Print_Area"/></Cell>
   </Row>
   <Row>
    <Cell><Data ss:Type="String">YAR007C</Data><NamedCell ss:Name="Print_Area"/></Cell>
    <Cell><Data ss:Type="String">YJL173C</Data><NamedCell ss:Name="Print_Area"/></Cell>
    <Cell><Data ss:Type="String">affinitycapturems</Data><NamedCell
      ss:Name="Print_Area"/></Cell>
    <Cell><Data ss:Type="Number">16429126</Data><NamedCell ss:Name="Print_Area"/></Cell>
   </Row>
   <Row>
    <Cell><Data ss:Type="String">YAR007C</Data><NamedCell ss:Name="Print_Area"/></Cell>
    <Cell><Data ss:Type="String">YJL173C</Data><NamedCell ss:Name="Print_Area"/></Cell>
    <Cell><Data ss:Type="String">copurification</Data><NamedCell
      ss:Name="Print_Area"/></Cell>
    <Cell><Data ss:Type="Number">14634024</Data><NamedCell ss:Name="Print_Area"/></Cell>
   </Row>
   <Row>
    <Cell><Data ss:Type="String">YAR007C</Data><NamedCell ss:Name="Print_Area"/></Cell>
    <Cell><Data ss:Type="String">YJL173C</Data><NamedCell ss:Name="Print_Area"/></Cell>
    <Cell><Data ss:Type="String">twohybrid</Data><NamedCell ss:Name="Print_Area"/></Cell>
    <Cell><Data ss:Type="Number">11283351</Data><NamedCell ss:Name="Print_Area"/></Cell>
   </Row>
   <Row>
    <Cell><Data ss:Type="String">YAR007C</Data><NamedCell ss:Name="Print_Area"/></Cell>
    <Cell><Data ss:Type="String">YJL173C</Data><NamedCell ss:Name="Print_Area"/></Cell>
    <Cell><Data ss:Type="String">affinitycapturems</Data><NamedCell
      ss:Name="Print_Area"/></Cell>
    <Cell><Data ss:Type="Number">16554755</Data><NamedCell ss:Name="Print_Area"/></Cell>
   </Row>
   <Row>
    <Cell><Data ss:Type="String">YAR007C</Data><NamedCell ss:Name="Print_Area"/></Cell>
    <Cell><Data ss:Type="String">YJL173C</Data><NamedCell ss:Name="Print_Area"/></Cell>
    <Cell><Data ss:Type="String">unknown</Data><NamedCell ss:Name="Print_Area"/></Cell>
    <Cell><Data ss:Type="Number">7760793</Data><NamedCell ss:Name="Print_Area"/></Cell>
   </Row>
   <Row>
    <Cell><Data ss:Type="String">YAR007C</Data><NamedCell ss:Name="Print_Area"/></Cell>
    <Cell><Data ss:Type="String">YJL173C</Data><NamedCell ss:Name="Print_Area"/></Cell>
    <Cell><Data ss:Type="String">unknown</Data><NamedCell ss:Name="Print_Area"/></Cell>
    <Cell><Data ss:Type="Number">8910442</Data><NamedCell ss:Name="Print_Area"/></Cell>
   </Row>
   <Row>
    <Cell><Data ss:Type="String">YAR007C</Data><NamedCell ss:Name="Print_Area"/></Cell>
    <Cell><Data ss:Type="String">YLR103C</Data><NamedCell ss:Name="Print_Area"/></Cell>
    <Cell><Data ss:Type="String">affinitycapturewestern</Data><NamedCell
      ss:Name="Print_Area"/></Cell>
    <Cell><Data ss:Type="Number">10757793</Data><NamedCell ss:Name="Print_Area"/></Cell>
   </Row>
   <Row>
    <Cell><Data ss:Type="String">YAR007C</Data><NamedCell ss:Name="Print_Area"/></Cell>
    <Cell><Data ss:Type="String">YML032C</Data><NamedCell ss:Name="Print_Area"/></Cell>
    <Cell><Data ss:Type="String">unknown</Data><NamedCell ss:Name="Print_Area"/></Cell>
    <Cell><Data ss:Type="Number">9632824</Data><NamedCell ss:Name="Print_Area"/></Cell>
   </Row>
   <Row>
    <Cell><Data ss:Type="String">YAR007C</Data><NamedCell ss:Name="Print_Area"/></Cell>
    <Cell><Data ss:Type="String">YML032C</Data><NamedCell ss:Name="Print_Area"/></Cell>
    <Cell><Data ss:Type="String">affinitycapturems</Data><NamedCell
      ss:Name="Print_Area"/></Cell>
    <Cell><Data ss:Type="Number">16429126</Data><NamedCell ss:Name="Print_Area"/></Cell>
   </Row>
   <Row>
    <Cell><Data ss:Type="String">YAR007C</Data><NamedCell ss:Name="Print_Area"/></Cell>
    <Cell><Data ss:Type="String">YML032C</Data><NamedCell ss:Name="Print_Area"/></Cell>
    <Cell><Data ss:Type="String">colocalization</Data><NamedCell
      ss:Name="Print_Area"/></Cell>
    <Cell><Data ss:Type="Number">15369670</Data><NamedCell ss:Name="Print_Area"/></Cell>
   </Row>
   <Row>
    <Cell><Data ss:Type="String">YAR007C</Data><NamedCell ss:Name="Print_Area"/></Cell>
    <Cell><Data ss:Type="String">YML032C</Data><NamedCell ss:Name="Print_Area"/></Cell>
    <Cell><Data ss:Type="String">twohybrid</Data><NamedCell ss:Name="Print_Area"/></Cell>
    <Cell><Data ss:Type="Number">9632824</Data><NamedCell ss:Name="Print_Area"/></Cell>
   </Row>
   <Row>
    <Cell><Data ss:Type="String">YAR007C</Data><NamedCell ss:Name="Print_Area"/></Cell>
    <Cell><Data ss:Type="String">YML032C</Data><NamedCell ss:Name="Print_Area"/></Cell>
    <Cell><Data ss:Type="String">affinitycapturems</Data><NamedCell
      ss:Name="Print_Area"/></Cell>
    <Cell><Data ss:Type="Number">11805826</Data><NamedCell ss:Name="Print_Area"/></Cell>
   </Row>
   <Row>
    <Cell><Data ss:Type="String">YAR007C</Data><NamedCell ss:Name="Print_Area"/></Cell>
    <Cell><Data ss:Type="String">YNL312W</Data><NamedCell ss:Name="Print_Area"/></Cell>
    <Cell><Data ss:Type="String">affinitycapturems</Data><NamedCell
      ss:Name="Print_Area"/></Cell>
    <Cell><Data ss:Type="Number">16554755</Data><NamedCell ss:Name="Print_Area"/></Cell>
   </Row>
   <Row>
    <Cell><Data ss:Type="String">YAR007C</Data><NamedCell ss:Name="Print_Area"/></Cell>
    <Cell><Data ss:Type="String">YNL312W</Data><NamedCell ss:Name="Print_Area"/></Cell>
    <Cell><Data ss:Type="String">affinitycapturems</Data><NamedCell
      ss:Name="Print_Area"/></Cell>
    <Cell><Data ss:Type="Number">11805826</Data><NamedCell ss:Name="Print_Area"/></Cell>
   </Row>
   <Row>
    <Cell><Data ss:Type="String">YAR007C</Data><NamedCell ss:Name="Print_Area"/></Cell>
    <Cell><Data ss:Type="String">YNL312W</Data><NamedCell ss:Name="Print_Area"/></Cell>
    <Cell><Data ss:Type="String">reconstitutedcomplex</Data><NamedCell
      ss:Name="Print_Area"/></Cell>
    <Cell><Data ss:Type="Number">11479296</Data><NamedCell ss:Name="Print_Area"/></Cell>
   </Row>
   <Row>
    <Cell><Data ss:Type="String">YAR007C</Data><NamedCell ss:Name="Print_Area"/></Cell>
    <Cell><Data ss:Type="String">YNL312W</Data><NamedCell ss:Name="Print_Area"/></Cell>
    <Cell><Data ss:Type="String">unknown</Data><NamedCell ss:Name="Print_Area"/></Cell>
    <Cell><Data ss:Type="Number">8910442</Data><NamedCell ss:Name="Print_Area"/></Cell>
   </Row>
   <Row>
    <Cell><Data ss:Type="String">YAR007C</Data><NamedCell ss:Name="Print_Area"/></Cell>
    <Cell><Data ss:Type="String">YNL312W</Data><NamedCell ss:Name="Print_Area"/></Cell>
    <Cell><Data ss:Type="String">copurification</Data><NamedCell
      ss:Name="Print_Area"/></Cell>
    <Cell><Data ss:Type="Number">14634024</Data><NamedCell ss:Name="Print_Area"/></Cell>
   </Row>
   <Row>
    <Cell><Data ss:Type="String">YAR007C</Data><NamedCell ss:Name="Print_Area"/></Cell>
    <Cell><Data ss:Type="String">YNL312W</Data><NamedCell ss:Name="Print_Area"/></Cell>
    <Cell><Data ss:Type="String">affinitycapturems</Data><NamedCell
      ss:Name="Print_Area"/></Cell>
    <Cell><Data ss:Type="Number">16429126</Data><NamedCell ss:Name="Print_Area"/></Cell>
   </Row>
   <Row>
    <Cell><Data ss:Type="String">YAR008W</Data><NamedCell ss:Name="Print_Area"/></Cell>
    <Cell><Data ss:Type="String">YLR105C</Data><NamedCell ss:Name="Print_Area"/></Cell>
    <Cell><Data ss:Type="String">affinitycapturewestern</Data><NamedCell
      ss:Name="Print_Area"/></Cell>
    <Cell><Data ss:Type="Number">9200603</Data><NamedCell ss:Name="Print_Area"/></Cell>
   </Row>
   <Row>
    <Cell><Data ss:Type="String">YAR008W</Data><NamedCell ss:Name="Print_Area"/></Cell>
    <Cell><Data ss:Type="String">YLR105C</Data><NamedCell ss:Name="Print_Area"/></Cell>
    <Cell><Data ss:Type="String">unknown</Data><NamedCell ss:Name="Print_Area"/></Cell>
    <Cell><Data ss:Type="Number">9200603</Data><NamedCell ss:Name="Print_Area"/></Cell>
   </Row>
   <Row>
    <Cell><Data ss:Type="String">YAR008W</Data><NamedCell ss:Name="Print_Area"/></Cell>
    <Cell><Data ss:Type="String">YLR105C</Data><NamedCell ss:Name="Print_Area"/></Cell>
    <Cell><Data ss:Type="String">copurification</Data><NamedCell
      ss:Name="Print_Area"/></Cell>
    <Cell><Data ss:Type="Number">9200603</Data><NamedCell ss:Name="Print_Area"/></Cell>
   </Row>
   <Row>
    <Cell><Data ss:Type="String">YAR008W</Data><NamedCell ss:Name="Print_Area"/></Cell>
    <Cell><Data ss:Type="String">YMR059W</Data><NamedCell ss:Name="Print_Area"/></Cell>
    <Cell><Data ss:Type="String">twohybrid</Data><NamedCell ss:Name="Print_Area"/></Cell>
    <Cell><Data ss:Type="Number">9200603</Data><NamedCell ss:Name="Print_Area"/></Cell>
   </Row>
   <Row>
    <Cell><Data ss:Type="String">YAR008W</Data><NamedCell ss:Name="Print_Area"/></Cell>
    <Cell><Data ss:Type="String">YMR059W</Data><NamedCell ss:Name="Print_Area"/></Cell>
    <Cell><Data ss:Type="String">copurification</Data><NamedCell
      ss:Name="Print_Area"/></Cell>
    <Cell><Data ss:Type="Number">9200603</Data><NamedCell ss:Name="Print_Area"/></Cell>
   </Row>
   <Row>
    <Cell><Data ss:Type="String">YAR008W</Data><NamedCell ss:Name="Print_Area"/></Cell>
    <Cell><Data ss:Type="String">YMR059W</Data><NamedCell ss:Name="Print_Area"/></Cell>
    <Cell><Data ss:Type="String">unknown</Data><NamedCell ss:Name="Print_Area"/></Cell>
    <Cell><Data ss:Type="Number">9200603</Data><NamedCell ss:Name="Print_Area"/></Cell>
   </Row>
   <Row>
    <Cell><Data ss:Type="String">YAR008W</Data><NamedCell ss:Name="Print_Area"/></Cell>
    <Cell><Data ss:Type="String">YPL083C</Data><NamedCell ss:Name="Print_Area"/></Cell>
    <Cell><Data ss:Type="String">unknown</Data><NamedCell ss:Name="Print_Area"/></Cell>
    <Cell><Data ss:Type="Number">9200603</Data><NamedCell ss:Name="Print_Area"/></Cell>
   </Row>
   <Row>
    <Cell><Data ss:Type="String">YAR008W</Data><NamedCell ss:Name="Print_Area"/></Cell>
    <Cell><Data ss:Type="String">YPL083C</Data><NamedCell ss:Name="Print_Area"/></Cell>
    <Cell><Data ss:Type="String">copurification</Data><NamedCell
      ss:Name="Print_Area"/></Cell>
    <Cell><Data ss:Type="Number">9200603</Data><NamedCell ss:Name="Print_Area"/></Cell>
   </Row>
   <Row>
    <Cell><Data ss:Type="String">YAR014C</Data><NamedCell ss:Name="Print_Area"/></Cell>
    <Cell><Data ss:Type="String">YER133W</Data><NamedCell ss:Name="Print_Area"/></Cell>
    <Cell><Data ss:Type="String">affinitycapturewestern</Data><NamedCell
      ss:Name="Print_Area"/></Cell>
    <Cell><Data ss:Type="Number">15601868</Data><NamedCell ss:Name="Print_Area"/></Cell>
   </Row>
   <Row>
    <Cell><Data ss:Type="String">YAR014C</Data><NamedCell ss:Name="Print_Area"/></Cell>
    <Cell><Data ss:Type="String">YER133W</Data><NamedCell ss:Name="Print_Area"/></Cell>
    <Cell><Data ss:Type="String">affinitycapturewestern</Data><NamedCell
      ss:Name="Print_Area"/></Cell>
    <Cell><Data ss:Type="Number">16107882</Data><NamedCell ss:Name="Print_Area"/></Cell>
   </Row>
   <Row>
    <Cell><Data ss:Type="String">YAR014C</Data><NamedCell ss:Name="Print_Area"/></Cell>
    <Cell><Data ss:Type="String">YER133W</Data><NamedCell ss:Name="Print_Area"/></Cell>
    <Cell><Data ss:Type="String">twohybrid</Data><NamedCell ss:Name="Print_Area"/></Cell>
    <Cell><Data ss:Type="Number">10688190</Data><NamedCell ss:Name="Print_Area"/></Cell>
   </Row>
   <Row>
    <Cell><Data ss:Type="String">YAR014C</Data><NamedCell ss:Name="Print_Area"/></Cell>
    <Cell><Data ss:Type="String">YER133W</Data><NamedCell ss:Name="Print_Area"/></Cell>
    <Cell><Data ss:Type="String">twohybrid</Data><NamedCell ss:Name="Print_Area"/></Cell>
    <Cell><Data ss:Type="Number">16107882</Data><NamedCell ss:Name="Print_Area"/></Cell>
   </Row>
   <Row>
    <Cell><Data ss:Type="String">YAR014C</Data><NamedCell ss:Name="Print_Area"/></Cell>
    <Cell><Data ss:Type="String">YER133W</Data><NamedCell ss:Name="Print_Area"/></Cell>
    <Cell><Data ss:Type="String">affinitycapturems</Data><NamedCell
      ss:Name="Print_Area"/></Cell>
    <Cell><Data ss:Type="Number">16429126</Data><NamedCell ss:Name="Print_Area"/></Cell>
   </Row>
   <Row>
    <Cell><Data ss:Type="String">YAR014C</Data><NamedCell ss:Name="Print_Area"/></Cell>
    <Cell><Data ss:Type="String">YER133W</Data><NamedCell ss:Name="Print_Area"/></Cell>
    <Cell><Data ss:Type="String">twohybrid</Data><NamedCell ss:Name="Print_Area"/></Cell>
    <Cell><Data ss:Type="Number">15601868</Data><NamedCell ss:Name="Print_Area"/></Cell>
   </Row>
   <Row>
    <Cell><Data ss:Type="String">YAR014C</Data><NamedCell ss:Name="Print_Area"/></Cell>
    <Cell><Data ss:Type="String">YER133W</Data><NamedCell ss:Name="Print_Area"/></Cell>
    <Cell><Data ss:Type="String">affinitycapturems</Data><NamedCell
      ss:Name="Print_Area"/></Cell>
    <Cell><Data ss:Type="Number">16554755</Data><NamedCell ss:Name="Print_Area"/></Cell>
   </Row>
   <Row>
    <Cell><Data ss:Type="String">YAR014C</Data><NamedCell ss:Name="Print_Area"/></Cell>
    <Cell><Data ss:Type="String">YER155C</Data><NamedCell ss:Name="Print_Area"/></Cell>
    <Cell><Data ss:Type="String">affinitycapturems</Data><NamedCell
      ss:Name="Print_Area"/></Cell>
    <Cell><Data ss:Type="Number">16429126</Data><NamedCell ss:Name="Print_Area"/></Cell>
   </Row>
   <Row>
    <Cell><Data ss:Type="String">YAR014C</Data><NamedCell ss:Name="Print_Area"/></Cell>
    <Cell><Data ss:Type="String">YER155C</Data><NamedCell ss:Name="Print_Area"/></Cell>
    <Cell><Data ss:Type="String">affinitycapturems</Data><NamedCell
      ss:Name="Print_Area"/></Cell>
    <Cell><Data ss:Type="Number">16554755</Data><NamedCell ss:Name="Print_Area"/></Cell>
   </Row>
   <Row>
    <Cell><Data ss:Type="String">YAR014C</Data><NamedCell ss:Name="Print_Area"/></Cell>
    <Cell><Data ss:Type="String">YER155C</Data><NamedCell ss:Name="Print_Area"/></Cell>
    <Cell><Data ss:Type="String">twohybrid</Data><NamedCell ss:Name="Print_Area"/></Cell>
    <Cell><Data ss:Type="Number">16107882</Data><NamedCell ss:Name="Print_Area"/></Cell>
   </Row>
   <Row>
    <Cell><Data ss:Type="String">YAR014C</Data><NamedCell ss:Name="Print_Area"/></Cell>
    <Cell><Data ss:Type="String">YER155C</Data><NamedCell ss:Name="Print_Area"/></Cell>
    <Cell><Data ss:Type="String">affinitycapturems</Data><NamedCell
      ss:Name="Print_Area"/></Cell>
    <Cell><Data ss:Type="Number">11805826</Data><NamedCell ss:Name="Print_Area"/></Cell>
   </Row>
   <Row>
    <Cell><Data ss:Type="String">YAR015W</Data><NamedCell ss:Name="Print_Area"/></Cell>
    <Cell><Data ss:Type="String">YPL240C</Data><NamedCell ss:Name="Print_Area"/></Cell>
    <Cell><Data ss:Type="String">affinitycapturems</Data><NamedCell
      ss:Name="Print_Area"/></Cell>
    <Cell><Data ss:Type="Number">15766533</Data><NamedCell ss:Name="Print_Area"/></Cell>
   </Row>
   <Row>
    <Cell><Data ss:Type="String">YAR015W</Data><NamedCell ss:Name="Print_Area"/></Cell>
    <Cell><Data ss:Type="String">YPL240C</Data><NamedCell ss:Name="Print_Area"/></Cell>
    <Cell><Data ss:Type="String">twohybrid</Data><NamedCell ss:Name="Print_Area"/></Cell>
    <Cell><Data ss:Type="Number">15766533</Data><NamedCell ss:Name="Print_Area"/></Cell>
   </Row>
   <Row>
    <Cell><Data ss:Type="String">YAR019C</Data><NamedCell ss:Name="Print_Area"/></Cell>
    <Cell><Data ss:Type="String">YFR028C</Data><NamedCell ss:Name="Print_Area"/></Cell>
    <Cell><Data ss:Type="String">reconstitutedcomplex</Data><NamedCell
      ss:Name="Print_Area"/></Cell>
    <Cell><Data ss:Type="Number">10744974</Data><NamedCell ss:Name="Print_Area"/></Cell>
   </Row>
   <Row>
    <Cell><Data ss:Type="String">YAR019C</Data><NamedCell ss:Name="Print_Area"/></Cell>
    <Cell><Data ss:Type="String">YFR028C</Data><NamedCell ss:Name="Print_Area"/></Cell>
    <Cell><Data ss:Type="String">biochemicalactivity</Data><NamedCell
      ss:Name="Print_Area"/></Cell>
    <Cell><Data ss:Type="Number">10744974</Data><NamedCell ss:Name="Print_Area"/></Cell>
   </Row>
   <Row>
    <Cell><Data ss:Type="String">YAR019C</Data><NamedCell ss:Name="Print_Area"/></Cell>
    <Cell><Data ss:Type="String">YFR028C</Data><NamedCell ss:Name="Print_Area"/></Cell>
    <Cell><Data ss:Type="String">biochemicalactivity</Data><NamedCell
      ss:Name="Print_Area"/></Cell>
    <Cell><Data ss:Type="Number">10837230</Data><NamedCell ss:Name="Print_Area"/></Cell>
   </Row>
   <Row>
    <Cell><Data ss:Type="String">YAR019C</Data><NamedCell ss:Name="Print_Area"/></Cell>
    <Cell><Data ss:Type="String">YFR028C</Data><NamedCell ss:Name="Print_Area"/></Cell>
    <Cell><Data ss:Type="String">unknown</Data><NamedCell ss:Name="Print_Area"/></Cell>
    <Cell><Data ss:Type="Number">10744974</Data><NamedCell ss:Name="Print_Area"/></Cell>
   </Row>
   <Row>
    <Cell><Data ss:Type="String">YAR019C</Data><NamedCell ss:Name="Print_Area"/></Cell>
    <Cell><Data ss:Type="String">YFR028C</Data><NamedCell ss:Name="Print_Area"/></Cell>
    <Cell><Data ss:Type="String">biochemicalactivity</Data><NamedCell
      ss:Name="Print_Area"/></Cell>
    <Cell><Data ss:Type="Number">11267871</Data><NamedCell ss:Name="Print_Area"/></Cell>
   </Row>
   <Row>
    <Cell><Data ss:Type="String">YAR019C</Data><NamedCell ss:Name="Print_Area"/></Cell>
    <Cell><Data ss:Type="String">YGR092W</Data><NamedCell ss:Name="Print_Area"/></Cell>
    <Cell><Data ss:Type="String">colocalization</Data><NamedCell
      ss:Name="Print_Area"/></Cell>
    <Cell><Data ss:Type="Number">11598184</Data><NamedCell ss:Name="Print_Area"/></Cell>
   </Row>
   <Row>
    <Cell><Data ss:Type="String">YAR019C</Data><NamedCell ss:Name="Print_Area"/></Cell>
    <Cell><Data ss:Type="String">YGR092W</Data><NamedCell ss:Name="Print_Area"/></Cell>
    <Cell><Data ss:Type="String">reconstitutedcomplex</Data><NamedCell
      ss:Name="Print_Area"/></Cell>
    <Cell><Data ss:Type="Number">11404483</Data><NamedCell ss:Name="Print_Area"/></Cell>
   </Row>
   <Row>
    <Cell><Data ss:Type="String">YAR019C</Data><NamedCell ss:Name="Print_Area"/></Cell>
    <Cell><Data ss:Type="String">YGR092W</Data><NamedCell ss:Name="Print_Area"/></Cell>
    <Cell><Data ss:Type="String">biochemicalactivity</Data><NamedCell
      ss:Name="Print_Area"/></Cell>
    <Cell><Data ss:Type="Number">11404483</Data><NamedCell ss:Name="Print_Area"/></Cell>
   </Row>
   <Row>
    <Cell><Data ss:Type="String">YAR019C</Data><NamedCell ss:Name="Print_Area"/></Cell>
    <Cell><Data ss:Type="String">YGR092W</Data><NamedCell ss:Name="Print_Area"/></Cell>
    <Cell><Data ss:Type="String">colocalization</Data><NamedCell
      ss:Name="Print_Area"/></Cell>
    <Cell><Data ss:Type="Number">10984431</Data><NamedCell ss:Name="Print_Area"/></Cell>
   </Row>
   <Row>
    <Cell><Data ss:Type="String">YAR019C</Data><NamedCell ss:Name="Print_Area"/></Cell>
    <Cell><Data ss:Type="String">YML064C</Data><NamedCell ss:Name="Print_Area"/></Cell>
    <Cell><Data ss:Type="String">twohybrid</Data><NamedCell ss:Name="Print_Area"/></Cell>
    <Cell><Data ss:Type="Number">11290702</Data><NamedCell ss:Name="Print_Area"/></Cell>
   </Row>
   <Row>
    <Cell><Data ss:Type="String">YAR019C</Data><NamedCell ss:Name="Print_Area"/></Cell>
    <Cell><Data ss:Type="String">YML064C</Data><NamedCell ss:Name="Print_Area"/></Cell>
    <Cell><Data ss:Type="String">unknown</Data><NamedCell ss:Name="Print_Area"/></Cell>
    <Cell><Data ss:Type="Number">11290702</Data><NamedCell ss:Name="Print_Area"/></Cell>
   </Row>
   <Row>
    <Cell><Data ss:Type="String">YAR019C</Data><NamedCell ss:Name="Print_Area"/></Cell>
    <Cell><Data ss:Type="String">YML064C</Data><NamedCell ss:Name="Print_Area"/></Cell>
    <Cell><Data ss:Type="String">unknown</Data><NamedCell ss:Name="Print_Area"/></Cell>
    <Cell><Data ss:Type="Number">11959999</Data><NamedCell ss:Name="Print_Area"/></Cell>
   </Row>
   <Row>
    <Cell><Data ss:Type="String">YAR019C</Data><NamedCell ss:Name="Print_Area"/></Cell>
    <Cell><Data ss:Type="String">YML064C</Data><NamedCell ss:Name="Print_Area"/></Cell>
    <Cell><Data ss:Type="String">affinitycapturewestern</Data><NamedCell
      ss:Name="Print_Area"/></Cell>
    <Cell><Data ss:Type="Number">10929710</Data><NamedCell ss:Name="Print_Area"/></Cell>
   </Row>
   <Row>
    <Cell><Data ss:Type="String">YAR019C</Data><NamedCell ss:Name="Print_Area"/></Cell>
    <Cell><Data ss:Type="String">YML064C</Data><NamedCell ss:Name="Print_Area"/></Cell>
    <Cell><Data ss:Type="String">affinitycapturewestern</Data><NamedCell
      ss:Name="Print_Area"/></Cell>
    <Cell><Data ss:Type="Number">11959999</Data><NamedCell ss:Name="Print_Area"/></Cell>
   </Row>
   <Row>
    <Cell><Data ss:Type="String">YAR019C</Data><NamedCell ss:Name="Print_Area"/></Cell>
    <Cell><Data ss:Type="String">YML064C</Data><NamedCell ss:Name="Print_Area"/></Cell>
    <Cell><Data ss:Type="String">affinitycapturewestern</Data><NamedCell
      ss:Name="Print_Area"/></Cell>
    <Cell><Data ss:Type="Number">12832486</Data><NamedCell ss:Name="Print_Area"/></Cell>
   </Row>
   <Row>
    <Cell><Data ss:Type="String">YAR019C</Data><NamedCell ss:Name="Print_Area"/></Cell>
    <Cell><Data ss:Type="String">YML064C</Data><NamedCell ss:Name="Print_Area"/></Cell>
    <Cell><Data ss:Type="String">affinitycapturewestern</Data><NamedCell
      ss:Name="Print_Area"/></Cell>
    <Cell><Data ss:Type="Number">12628189</Data><NamedCell ss:Name="Print_Area"/></Cell>
   </Row>
   <Row>
    <Cell><Data ss:Type="String">YAR019C</Data><NamedCell ss:Name="Print_Area"/></Cell>
    <Cell><Data ss:Type="String">YML064C</Data><NamedCell ss:Name="Print_Area"/></Cell>
    <Cell><Data ss:Type="String">colocalization</Data><NamedCell
      ss:Name="Print_Area"/></Cell>
    <Cell><Data ss:Type="Number">11598184</Data><NamedCell ss:Name="Print_Area"/></Cell>
   </Row>
   <Row>
    <Cell><Data ss:Type="String">YAR019C</Data><NamedCell ss:Name="Print_Area"/></Cell>
    <Cell><Data ss:Type="String">YML064C</Data><NamedCell ss:Name="Print_Area"/></Cell>
    <Cell><Data ss:Type="String">affinitycapturewestern</Data><NamedCell
      ss:Name="Print_Area"/></Cell>
    <Cell><Data ss:Type="Number">11290702</Data><NamedCell ss:Name="Print_Area"/></Cell>
   </Row>
   <Row>
    <Cell><Data ss:Type="String">YAR027W</Data><NamedCell ss:Name="Print_Area"/></Cell>
    <Cell><Data ss:Type="String">YAR030C</Data><NamedCell ss:Name="Print_Area"/></Cell>
    <Cell><Data ss:Type="String">twohybrid</Data><NamedCell ss:Name="Print_Area"/></Cell>
    <Cell><Data ss:Type="Number">11283351</Data><NamedCell ss:Name="Print_Area"/></Cell>
   </Row>
   <Row>
    <Cell><Data ss:Type="String">YAR027W</Data><NamedCell ss:Name="Print_Area"/></Cell>
    <Cell><Data ss:Type="String">YAR030C</Data><NamedCell ss:Name="Print_Area"/></Cell>
    <Cell><Data ss:Type="String">twohybrid</Data><NamedCell ss:Name="Print_Area"/></Cell>
    <Cell><Data ss:Type="Number">10655498</Data><NamedCell ss:Name="Print_Area"/></Cell>
   </Row>
   <Row>
    <Cell><Data ss:Type="String">YAR027W</Data><NamedCell ss:Name="Print_Area"/></Cell>
    <Cell><Data ss:Type="String">YBR135W</Data><NamedCell ss:Name="Print_Area"/></Cell>
    <Cell><Data ss:Type="String">twohybrid</Data><NamedCell ss:Name="Print_Area"/></Cell>
    <Cell><Data ss:Type="Number">10655498</Data><NamedCell ss:Name="Print_Area"/></Cell>
   </Row>
   <Row>
    <Cell><Data ss:Type="String">YAR027W</Data><NamedCell ss:Name="Print_Area"/></Cell>
    <Cell><Data ss:Type="String">YBR135W</Data><NamedCell ss:Name="Print_Area"/></Cell>
    <Cell><Data ss:Type="String">twohybrid</Data><NamedCell ss:Name="Print_Area"/></Cell>
    <Cell><Data ss:Type="Number">11283351</Data><NamedCell ss:Name="Print_Area"/></Cell>
   </Row>
   <Row>
    <Cell><Data ss:Type="String">YAR033W</Data><NamedCell ss:Name="Print_Area"/></Cell>
    <Cell><Data ss:Type="String">YGL051W</Data><NamedCell ss:Name="Print_Area"/></Cell>
    <Cell><Data ss:Type="String">copurification</Data><NamedCell
      ss:Name="Print_Area"/></Cell>
    <Cell><Data ss:Type="Number">12925749</Data><NamedCell ss:Name="Print_Area"/></Cell>
   </Row>
   <Row>
    <Cell><Data ss:Type="String">YAR033W</Data><NamedCell ss:Name="Print_Area"/></Cell>
    <Cell><Data ss:Type="String">YGL051W</Data><NamedCell ss:Name="Print_Area"/></Cell>
    <Cell><Data ss:Type="String">twohybrid</Data><NamedCell ss:Name="Print_Area"/></Cell>
    <Cell><Data ss:Type="Number">10688190</Data><NamedCell ss:Name="Print_Area"/></Cell>
   </Row>
   <Row>
    <Cell><Data ss:Type="String">YAR042W</Data><NamedCell ss:Name="Print_Area"/></Cell>
    <Cell><Data ss:Type="String">YHR195W</Data><NamedCell ss:Name="Print_Area"/></Cell>
    <Cell><Data ss:Type="String">affinitycapturewestern</Data><NamedCell
      ss:Name="Print_Area"/></Cell>
    <Cell><Data ss:Type="Number">15367582</Data><NamedCell ss:Name="Print_Area"/></Cell>
   </Row>
   <Row>
    <Cell><Data ss:Type="String">YAR042W</Data><NamedCell ss:Name="Print_Area"/></Cell>
    <Cell><Data ss:Type="String">YHR195W</Data><NamedCell ss:Name="Print_Area"/></Cell>
    <Cell><Data ss:Type="String">colocalization</Data><NamedCell
      ss:Name="Print_Area"/></Cell>
    <Cell><Data ss:Type="Number">15367582</Data><NamedCell ss:Name="Print_Area"/></Cell>
   </Row>
   <Row>
    <Cell><Data ss:Type="String">YAR064W</Data><NamedCell ss:Name="Print_Area"/></Cell>
    <Cell><Data ss:Type="String">YBR109C</Data><NamedCell ss:Name="Print_Area"/></Cell>
    <Cell><Data ss:Type="String">reconstitutedcomplex</Data><NamedCell
      ss:Name="Print_Area"/></Cell>
    <Cell><Data ss:Type="Number">11474067</Data><NamedCell ss:Name="Print_Area"/></Cell>
   </Row>
   <Row>
    <Cell><Data ss:Type="String">YAR064W</Data><NamedCell ss:Name="Print_Area"/></Cell>
    <Cell><Data ss:Type="String">YBR109C</Data><NamedCell ss:Name="Print_Area"/></Cell>
    <Cell><Data ss:Type="String">unknown</Data><NamedCell ss:Name="Print_Area"/></Cell>
    <Cell><Data ss:Type="Number">11474067</Data><NamedCell ss:Name="Print_Area"/></Cell>
   </Row>
   <Row>
    <Cell><Data ss:Type="String">YBL002W</Data><NamedCell ss:Name="Print_Area"/></Cell>
    <Cell><Data ss:Type="String">YBR009C</Data><NamedCell ss:Name="Print_Area"/></Cell>
    <Cell><Data ss:Type="String">cocrystalstructure</Data><NamedCell
      ss:Name="Print_Area"/></Cell>
    <Cell><Data ss:Type="Number">11566884</Data><NamedCell ss:Name="Print_Area"/></Cell>
   </Row>
   <Row>
    <Cell><Data ss:Type="String">YBL002W</Data><NamedCell ss:Name="Print_Area"/></Cell>
    <Cell><Data ss:Type="String">YCL066W</Data><NamedCell ss:Name="Print_Area"/></Cell>
    <Cell><Data ss:Type="String">twohybrid</Data><NamedCell ss:Name="Print_Area"/></Cell>
    <Cell><Data ss:Type="Number">10655498</Data><NamedCell ss:Name="Print_Area"/></Cell>
   </Row>
   <Row>
    <Cell><Data ss:Type="String">YBL002W</Data><NamedCell ss:Name="Print_Area"/></Cell>
    <Cell><Data ss:Type="String">YCL066W</Data><NamedCell ss:Name="Print_Area"/></Cell>
    <Cell><Data ss:Type="String">twohybrid</Data><NamedCell ss:Name="Print_Area"/></Cell>
    <Cell><Data ss:Type="Number">11283351</Data><NamedCell ss:Name="Print_Area"/></Cell>
   </Row>
   <Row>
    <Cell><Data ss:Type="String">YBL002W</Data><NamedCell ss:Name="Print_Area"/></Cell>
    <Cell><Data ss:Type="String">YDR225W</Data><NamedCell ss:Name="Print_Area"/></Cell>
    <Cell><Data ss:Type="String">copurification</Data><NamedCell
      ss:Name="Print_Area"/></Cell>
    <Cell><Data ss:Type="Number">10026213</Data><NamedCell ss:Name="Print_Area"/></Cell>
   </Row>
   <Row>
    <Cell><Data ss:Type="String">YBL002W</Data><NamedCell ss:Name="Print_Area"/></Cell>
    <Cell><Data ss:Type="String">YDR225W</Data><NamedCell ss:Name="Print_Area"/></Cell>
    <Cell><Data ss:Type="String">copurification</Data><NamedCell
      ss:Name="Print_Area"/></Cell>
    <Cell><Data ss:Type="Number">8017102</Data><NamedCell ss:Name="Print_Area"/></Cell>
   </Row>
   <Row>
    <Cell><Data ss:Type="String">YBL002W</Data><NamedCell ss:Name="Print_Area"/></Cell>
    <Cell><Data ss:Type="String">YDR225W</Data><NamedCell ss:Name="Print_Area"/></Cell>
    <Cell><Data ss:Type="String">cocrystalstructure</Data><NamedCell
      ss:Name="Print_Area"/></Cell>
    <Cell><Data ss:Type="Number">11566884</Data><NamedCell ss:Name="Print_Area"/></Cell>
   </Row>
   <Row>
    <Cell><Data ss:Type="String">YBL002W</Data><NamedCell ss:Name="Print_Area"/></Cell>
    <Cell><Data ss:Type="String">YOL012C</Data><NamedCell ss:Name="Print_Area"/></Cell>
    <Cell><Data ss:Type="String">affinitycapturems</Data><NamedCell
      ss:Name="Print_Area"/></Cell>
    <Cell><Data ss:Type="Number">16554755</Data><NamedCell ss:Name="Print_Area"/></Cell>
   </Row>
   <Row>
    <Cell><Data ss:Type="String">YBL002W</Data><NamedCell ss:Name="Print_Area"/></Cell>
    <Cell><Data ss:Type="String">YOL012C</Data><NamedCell ss:Name="Print_Area"/></Cell>
    <Cell><Data ss:Type="String">copurification</Data><NamedCell
      ss:Name="Print_Area"/></Cell>
    <Cell><Data ss:Type="Number">14645854</Data><NamedCell ss:Name="Print_Area"/></Cell>
   </Row>
   <Row>
    <Cell><Data ss:Type="String">YBL003C</Data><NamedCell ss:Name="Print_Area"/></Cell>
    <Cell><Data ss:Type="String">YDR225W</Data><NamedCell ss:Name="Print_Area"/></Cell>
    <Cell><Data ss:Type="String">affinitycapturems</Data><NamedCell
      ss:Name="Print_Area"/></Cell>
    <Cell><Data ss:Type="Number">16554755</Data><NamedCell ss:Name="Print_Area"/></Cell>
   </Row>
   <Row>
    <Cell><Data ss:Type="String">YBL003C</Data><NamedCell ss:Name="Print_Area"/></Cell>
    <Cell><Data ss:Type="String">YDR225W</Data><NamedCell ss:Name="Print_Area"/></Cell>
    <Cell><Data ss:Type="String">copurification</Data><NamedCell
      ss:Name="Print_Area"/></Cell>
    <Cell><Data ss:Type="Number">8017102</Data><NamedCell ss:Name="Print_Area"/></Cell>
   </Row>
   <Row>
    <Cell><Data ss:Type="String">YBL003C</Data><NamedCell ss:Name="Print_Area"/></Cell>
    <Cell><Data ss:Type="String">YDR225W</Data><NamedCell ss:Name="Print_Area"/></Cell>
    <Cell><Data ss:Type="String">copurification</Data><NamedCell
      ss:Name="Print_Area"/></Cell>
    <Cell><Data ss:Type="Number">10026213</Data><NamedCell ss:Name="Print_Area"/></Cell>
   </Row>
   <Row>
    <Cell><Data ss:Type="String">YBL003C</Data><NamedCell ss:Name="Print_Area"/></Cell>
    <Cell><Data ss:Type="String">YGL241W</Data><NamedCell ss:Name="Print_Area"/></Cell>
    <Cell><Data ss:Type="String">reconstitutedcomplex</Data><NamedCell
      ss:Name="Print_Area"/></Cell>
    <Cell><Data ss:Type="Number">15888545</Data><NamedCell ss:Name="Print_Area"/></Cell>
   </Row>
   <Row>
    <Cell><Data ss:Type="String">YBL003C</Data><NamedCell ss:Name="Print_Area"/></Cell>
    <Cell><Data ss:Type="String">YGL241W</Data><NamedCell ss:Name="Print_Area"/></Cell>
    <Cell><Data ss:Type="String">affinitycapturems</Data><NamedCell
      ss:Name="Print_Area"/></Cell>
    <Cell><Data ss:Type="Number">16554755</Data><NamedCell ss:Name="Print_Area"/></Cell>
   </Row>
   <Row>
    <Cell><Data ss:Type="String">YBL003C</Data><NamedCell ss:Name="Print_Area"/></Cell>
    <Cell><Data ss:Type="String">YGL241W</Data><NamedCell ss:Name="Print_Area"/></Cell>
    <Cell><Data ss:Type="String">affinitycapturewestern</Data><NamedCell
      ss:Name="Print_Area"/></Cell>
    <Cell><Data ss:Type="Number">15713633</Data><NamedCell ss:Name="Print_Area"/></Cell>
   </Row>
   <Row>
    <Cell><Data ss:Type="String">YBL003C</Data><NamedCell ss:Name="Print_Area"/></Cell>
    <Cell><Data ss:Type="String">YGL241W</Data><NamedCell ss:Name="Print_Area"/></Cell>
    <Cell><Data ss:Type="String">affinitycapturems</Data><NamedCell
      ss:Name="Print_Area"/></Cell>
    <Cell><Data ss:Type="Number">16429126</Data><NamedCell ss:Name="Print_Area"/></Cell>
   </Row>
   <Row>
    <Cell><Data ss:Type="String">YBL003C</Data><NamedCell ss:Name="Print_Area"/></Cell>
    <Cell><Data ss:Type="String">YHR099W</Data><NamedCell ss:Name="Print_Area"/></Cell>
    <Cell><Data ss:Type="String">affinitycapturems</Data><NamedCell
      ss:Name="Print_Area"/></Cell>
    <Cell><Data ss:Type="Number">16429126</Data><NamedCell ss:Name="Print_Area"/></Cell>
   </Row>
   <Row>
    <Cell><Data ss:Type="String">YBL003C</Data><NamedCell ss:Name="Print_Area"/></Cell>
    <Cell><Data ss:Type="String">YHR099W</Data><NamedCell ss:Name="Print_Area"/></Cell>
    <Cell><Data ss:Type="String">affinitycapturewestern</Data><NamedCell
      ss:Name="Print_Area"/></Cell>
    <Cell><Data ss:Type="Number">15610740</Data><NamedCell ss:Name="Print_Area"/></Cell>
   </Row>
   <Row>
    <Cell><Data ss:Type="String">YBL003C</Data><NamedCell ss:Name="Print_Area"/></Cell>
    <Cell><Data ss:Type="String">YKR048C</Data><NamedCell ss:Name="Print_Area"/></Cell>
    <Cell><Data ss:Type="String">affinitycapturems</Data><NamedCell
      ss:Name="Print_Area"/></Cell>
    <Cell><Data ss:Type="Number">16554755</Data><NamedCell ss:Name="Print_Area"/></Cell>
   </Row>
   <Row>
    <Cell><Data ss:Type="String">YBL003C</Data><NamedCell ss:Name="Print_Area"/></Cell>
    <Cell><Data ss:Type="String">YKR048C</Data><NamedCell ss:Name="Print_Area"/></Cell>
    <Cell><Data ss:Type="String">affinitycapturewestern</Data><NamedCell
      ss:Name="Print_Area"/></Cell>
    <Cell><Data ss:Type="Number">15713633</Data><NamedCell ss:Name="Print_Area"/></Cell>
   </Row>
   <Row>
    <Cell><Data ss:Type="String">YBL003C</Data><NamedCell ss:Name="Print_Area"/></Cell>
    <Cell><Data ss:Type="String">YKR048C</Data><NamedCell ss:Name="Print_Area"/></Cell>
    <Cell><Data ss:Type="String">affinitycapturems</Data><NamedCell
      ss:Name="Print_Area"/></Cell>
    <Cell><Data ss:Type="Number">16429126</Data><NamedCell ss:Name="Print_Area"/></Cell>
   </Row>
   <Row>
    <Cell><Data ss:Type="String">YBL003C</Data><NamedCell ss:Name="Print_Area"/></Cell>
    <Cell><Data ss:Type="String">YKR048C</Data><NamedCell ss:Name="Print_Area"/></Cell>
    <Cell><Data ss:Type="String">reconstitutedcomplex</Data><NamedCell
      ss:Name="Print_Area"/></Cell>
    <Cell><Data ss:Type="Number">15888545</Data><NamedCell ss:Name="Print_Area"/></Cell>
   </Row>
   <Row>
    <Cell><Data ss:Type="String">YBL003C</Data><NamedCell ss:Name="Print_Area"/></Cell>
    <Cell><Data ss:Type="String">YLR033W</Data><NamedCell ss:Name="Print_Area"/></Cell>
    <Cell><Data ss:Type="String">affinitycapturems</Data><NamedCell
      ss:Name="Print_Area"/></Cell>
    <Cell><Data ss:Type="Number">16554755</Data><NamedCell ss:Name="Print_Area"/></Cell>
   </Row>
   <Row>
    <Cell><Data ss:Type="String">YBL003C</Data><NamedCell ss:Name="Print_Area"/></Cell>
    <Cell><Data ss:Type="String">YLR033W</Data><NamedCell ss:Name="Print_Area"/></Cell>
    <Cell><Data ss:Type="String">affinitycapturems</Data><NamedCell
      ss:Name="Print_Area"/></Cell>
    <Cell><Data ss:Type="Number">14729968</Data><NamedCell ss:Name="Print_Area"/></Cell>
   </Row>
   <Row>
    <Cell><Data ss:Type="String">YBL003C</Data><NamedCell ss:Name="Print_Area"/></Cell>
    <Cell><Data ss:Type="String">YOR244W</Data><NamedCell ss:Name="Print_Area"/></Cell>
    <Cell><Data ss:Type="String">biochemicalactivity</Data><NamedCell
      ss:Name="Print_Area"/></Cell>
    <Cell><Data ss:Type="Number">10082517</Data><NamedCell ss:Name="Print_Area"/></Cell>
   </Row>
   <Row>
    <Cell><Data ss:Type="String">YBL003C</Data><NamedCell ss:Name="Print_Area"/></Cell>
    <Cell><Data ss:Type="String">YOR244W</Data><NamedCell ss:Name="Print_Area"/></Cell>
    <Cell><Data ss:Type="String">affinitycapturems</Data><NamedCell
      ss:Name="Print_Area"/></Cell>
    <Cell><Data ss:Type="Number">16554755</Data><NamedCell ss:Name="Print_Area"/></Cell>
   </Row>
   <Row>
    <Cell><Data ss:Type="String">YBL004W</Data><NamedCell ss:Name="Print_Area"/></Cell>
    <Cell><Data ss:Type="String">YJR002W</Data><NamedCell ss:Name="Print_Area"/></Cell>
    <Cell><Data ss:Type="String">affinitycapturems</Data><NamedCell
      ss:Name="Print_Area"/></Cell>
    <Cell><Data ss:Type="Number">15590835</Data><NamedCell ss:Name="Print_Area"/></Cell>
   </Row>
   <Row>
    <Cell><Data ss:Type="String">YBL004W</Data><NamedCell ss:Name="Print_Area"/></Cell>
    <Cell><Data ss:Type="String">YJR002W</Data><NamedCell ss:Name="Print_Area"/></Cell>
    <Cell><Data ss:Type="String">affinitycapturewestern</Data><NamedCell
      ss:Name="Print_Area"/></Cell>
    <Cell><Data ss:Type="Number">15590835</Data><NamedCell ss:Name="Print_Area"/></Cell>
   </Row>
   <Row>
    <Cell><Data ss:Type="String">YBL005W</Data><NamedCell ss:Name="Print_Area"/></Cell>
    <Cell><Data ss:Type="String">YDR176W</Data><NamedCell ss:Name="Print_Area"/></Cell>
    <Cell><Data ss:Type="String">affinitycapturewestern</Data><NamedCell
      ss:Name="Print_Area"/></Cell>
    <Cell><Data ss:Type="Number">8663102</Data><NamedCell ss:Name="Print_Area"/></Cell>
   </Row>
   <Row>
    <Cell><Data ss:Type="String">YBL005W</Data><NamedCell ss:Name="Print_Area"/></Cell>
    <Cell><Data ss:Type="String">YDR176W</Data><NamedCell ss:Name="Print_Area"/></Cell>
    <Cell><Data ss:Type="String">twohybrid</Data><NamedCell ss:Name="Print_Area"/></Cell>
    <Cell><Data ss:Type="Number">8663102</Data><NamedCell ss:Name="Print_Area"/></Cell>
   </Row>
   <Row>
    <Cell><Data ss:Type="String">YBL007C</Data><NamedCell ss:Name="Print_Area"/></Cell>
    <Cell><Data ss:Type="String">YCL034W</Data><NamedCell ss:Name="Print_Area"/></Cell>
    <Cell><Data ss:Type="String">twohybrid</Data><NamedCell ss:Name="Print_Area"/></Cell>
    <Cell><Data ss:Type="Number">15651983</Data><NamedCell ss:Name="Print_Area"/></Cell>
   </Row>
   <Row>
    <Cell><Data ss:Type="String">YBL007C</Data><NamedCell ss:Name="Print_Area"/></Cell>
    <Cell><Data ss:Type="String">YCL034W</Data><NamedCell ss:Name="Print_Area"/></Cell>
    <Cell><Data ss:Type="String">reconstitutedcomplex</Data><NamedCell
      ss:Name="Print_Area"/></Cell>
    <Cell><Data ss:Type="Number">15651983</Data><NamedCell ss:Name="Print_Area"/></Cell>
   </Row>
   <Row>
    <Cell><Data ss:Type="String">YBL007C</Data><NamedCell ss:Name="Print_Area"/></Cell>
    <Cell><Data ss:Type="String">YCL034W</Data><NamedCell ss:Name="Print_Area"/></Cell>
    <Cell><Data ss:Type="String">twohybrid</Data><NamedCell ss:Name="Print_Area"/></Cell>
    <Cell><Data ss:Type="Number">12388763</Data><NamedCell ss:Name="Print_Area"/></Cell>
   </Row>
   <Row>
    <Cell><Data ss:Type="String">YBL007C</Data><NamedCell ss:Name="Print_Area"/></Cell>
    <Cell><Data ss:Type="String">YCL034W</Data><NamedCell ss:Name="Print_Area"/></Cell>
    <Cell><Data ss:Type="String">affinitycapturewestern</Data><NamedCell
      ss:Name="Print_Area"/></Cell>
    <Cell><Data ss:Type="Number">12388763</Data><NamedCell ss:Name="Print_Area"/></Cell>
   </Row>
   <Row>
    <Cell><Data ss:Type="String">YBL007C</Data><NamedCell ss:Name="Print_Area"/></Cell>
    <Cell><Data ss:Type="String">YCL034W</Data><NamedCell ss:Name="Print_Area"/></Cell>
    <Cell><Data ss:Type="String">reconstitutedcomplex</Data><NamedCell
      ss:Name="Print_Area"/></Cell>
    <Cell><Data ss:Type="Number">12388763</Data><NamedCell ss:Name="Print_Area"/></Cell>
   </Row>
   <Row>
    <Cell><Data ss:Type="String">YBL007C</Data><NamedCell ss:Name="Print_Area"/></Cell>
    <Cell><Data ss:Type="String">YCR088W</Data><NamedCell ss:Name="Print_Area"/></Cell>
    <Cell><Data ss:Type="String">unknown</Data><NamedCell ss:Name="Print_Area"/></Cell>
    <Cell><Data ss:Type="Number">8552082</Data><NamedCell ss:Name="Print_Area"/></Cell>
   </Row>
   <Row>
    <Cell><Data ss:Type="String">YBL007C</Data><NamedCell ss:Name="Print_Area"/></Cell>
    <Cell><Data ss:Type="String">YCR088W</Data><NamedCell ss:Name="Print_Area"/></Cell>
    <Cell><Data ss:Type="String">fret</Data><NamedCell ss:Name="Print_Area"/></Cell>
    <Cell><Data ss:Type="Number">11950888</Data><NamedCell ss:Name="Print_Area"/></Cell>
   </Row>
   <Row>
    <Cell><Data ss:Type="String">YBL007C</Data><NamedCell ss:Name="Print_Area"/></Cell>
    <Cell><Data ss:Type="String">YCR088W</Data><NamedCell ss:Name="Print_Area"/></Cell>
    <Cell><Data ss:Type="String">proteinpeptide</Data><NamedCell
      ss:Name="Print_Area"/></Cell>
    <Cell><Data ss:Type="Number">11743162</Data><NamedCell ss:Name="Print_Area"/></Cell>
   </Row>
   <Row>
    <Cell><Data ss:Type="String">YBL007C</Data><NamedCell ss:Name="Print_Area"/></Cell>
    <Cell><Data ss:Type="String">YCR088W</Data><NamedCell ss:Name="Print_Area"/></Cell>
    <Cell><Data ss:Type="String">unknown</Data><NamedCell ss:Name="Print_Area"/></Cell>
    <Cell><Data ss:Type="Number">11950888</Data><NamedCell ss:Name="Print_Area"/></Cell>
   </Row>
   <Row>
    <Cell><Data ss:Type="String">YBL007C</Data><NamedCell ss:Name="Print_Area"/></Cell>
    <Cell><Data ss:Type="String">YCR088W</Data><NamedCell ss:Name="Print_Area"/></Cell>
    <Cell><Data ss:Type="String">affinitycapturewestern</Data><NamedCell
      ss:Name="Print_Area"/></Cell>
    <Cell><Data ss:Type="Number">11950888</Data><NamedCell ss:Name="Print_Area"/></Cell>
   </Row>
   <Row>
    <Cell><Data ss:Type="String">YBL007C</Data><NamedCell ss:Name="Print_Area"/></Cell>
    <Cell><Data ss:Type="String">YCR088W</Data><NamedCell ss:Name="Print_Area"/></Cell>
    <Cell><Data ss:Type="String">reconstitutedcomplex</Data><NamedCell
      ss:Name="Print_Area"/></Cell>
    <Cell><Data ss:Type="Number">11950888</Data><NamedCell ss:Name="Print_Area"/></Cell>
   </Row>
   <Row>
    <Cell><Data ss:Type="String">YBL007C</Data><NamedCell ss:Name="Print_Area"/></Cell>
    <Cell><Data ss:Type="String">YDR388W</Data><NamedCell ss:Name="Print_Area"/></Cell>
    <Cell><Data ss:Type="String">farwestern</Data><NamedCell ss:Name="Print_Area"/></Cell>
    <Cell><Data ss:Type="Number">14761940</Data><NamedCell ss:Name="Print_Area"/></Cell>
   </Row>
   <Row>
    <Cell><Data ss:Type="String">YBL007C</Data><NamedCell ss:Name="Print_Area"/></Cell>
    <Cell><Data ss:Type="String">YDR388W</Data><NamedCell ss:Name="Print_Area"/></Cell>
    <Cell><Data ss:Type="String">twohybrid</Data><NamedCell ss:Name="Print_Area"/></Cell>
    <Cell><Data ss:Type="Number">11489916</Data><NamedCell ss:Name="Print_Area"/></Cell>
   </Row>
   <Row>
    <Cell><Data ss:Type="String">YBL007C</Data><NamedCell ss:Name="Print_Area"/></Cell>
    <Cell><Data ss:Type="String">YDR388W</Data><NamedCell ss:Name="Print_Area"/></Cell>
    <Cell><Data ss:Type="String">reconstitutedcomplex</Data><NamedCell
      ss:Name="Print_Area"/></Cell>
    <Cell><Data ss:Type="Number">14761940</Data><NamedCell ss:Name="Print_Area"/></Cell>
   </Row>
   <Row>
    <Cell><Data ss:Type="String">YBL007C</Data><NamedCell ss:Name="Print_Area"/></Cell>
    <Cell><Data ss:Type="String">YDR388W</Data><NamedCell ss:Name="Print_Area"/></Cell>
    <Cell><Data ss:Type="String">affinitycapturewestern</Data><NamedCell
      ss:Name="Print_Area"/></Cell>
    <Cell><Data ss:Type="Number">14761940</Data><NamedCell ss:Name="Print_Area"/></Cell>
   </Row>
   <Row>
    <Cell><Data ss:Type="String">YBL007C</Data><NamedCell ss:Name="Print_Area"/></Cell>
    <Cell><Data ss:Type="String">YER125W</Data><NamedCell ss:Name="Print_Area"/></Cell>
    <Cell><Data ss:Type="String">reconstitutedcomplex</Data><NamedCell
      ss:Name="Print_Area"/></Cell>
    <Cell><Data ss:Type="Number">14761940</Data><NamedCell ss:Name="Print_Area"/></Cell>
   </Row>
   <Row>
    <Cell><Data ss:Type="String">YBL007C</Data><NamedCell ss:Name="Print_Area"/></Cell>
    <Cell><Data ss:Type="String">YER125W</Data><NamedCell ss:Name="Print_Area"/></Cell>
    <Cell><Data ss:Type="String">affinitycapturewestern</Data><NamedCell
      ss:Name="Print_Area"/></Cell>
    <Cell><Data ss:Type="Number">14761940</Data><NamedCell ss:Name="Print_Area"/></Cell>
   </Row>
   <Row>
    <Cell><Data ss:Type="String">YBL007C</Data><NamedCell ss:Name="Print_Area"/></Cell>
    <Cell><Data ss:Type="String">YER133W</Data><NamedCell ss:Name="Print_Area"/></Cell>
    <Cell><Data ss:Type="String">twohybrid</Data><NamedCell ss:Name="Print_Area"/></Cell>
    <Cell><Data ss:Type="Number">10790385</Data><NamedCell ss:Name="Print_Area"/></Cell>
   </Row>
   <Row>
    <Cell><Data ss:Type="String">YBL007C</Data><NamedCell ss:Name="Print_Area"/></Cell>
    <Cell><Data ss:Type="String">YER133W</Data><NamedCell ss:Name="Print_Area"/></Cell>
    <Cell><Data ss:Type="String">twohybrid</Data><NamedCell ss:Name="Print_Area"/></Cell>
    <Cell><Data ss:Type="Number">8754819</Data><NamedCell ss:Name="Print_Area"/></Cell>
   </Row>
   <Row>
    <Cell><Data ss:Type="String">YBL007C</Data><NamedCell ss:Name="Print_Area"/></Cell>
    <Cell><Data ss:Type="String">YFR024C-A</Data><NamedCell ss:Name="Print_Area"/></Cell>
    <Cell><Data ss:Type="String">proteinpeptide</Data><NamedCell
      ss:Name="Print_Area"/></Cell>
    <Cell><Data ss:Type="Number">14737190</Data><NamedCell ss:Name="Print_Area"/></Cell>
   </Row>
   <Row>
    <Cell><Data ss:Type="String">YBL007C</Data><NamedCell ss:Name="Print_Area"/></Cell>
    <Cell><Data ss:Type="String">YFR024C-A</Data><NamedCell ss:Name="Print_Area"/></Cell>
    <Cell><Data ss:Type="String">affinitycapturems</Data><NamedCell
      ss:Name="Print_Area"/></Cell>
    <Cell><Data ss:Type="Number">16429126</Data><NamedCell ss:Name="Print_Area"/></Cell>
   </Row>
   <Row>
    <Cell><Data ss:Type="String">YBL007C</Data><NamedCell ss:Name="Print_Area"/></Cell>
    <Cell><Data ss:Type="String">YFR024C-A</Data><NamedCell ss:Name="Print_Area"/></Cell>
    <Cell><Data ss:Type="String">twohybrid</Data><NamedCell ss:Name="Print_Area"/></Cell>
    <Cell><Data ss:Type="Number">11743162</Data><NamedCell ss:Name="Print_Area"/></Cell>
   </Row>
   <Row>
    <Cell><Data ss:Type="String">YBL007C</Data><NamedCell ss:Name="Print_Area"/></Cell>
    <Cell><Data ss:Type="String">YGR268C</Data><NamedCell ss:Name="Print_Area"/></Cell>
    <Cell><Data ss:Type="String">twohybrid</Data><NamedCell ss:Name="Print_Area"/></Cell>
    <Cell><Data ss:Type="Number">11743162</Data><NamedCell ss:Name="Print_Area"/></Cell>
   </Row>
   <Row>
    <Cell><Data ss:Type="String">YBL007C</Data><NamedCell ss:Name="Print_Area"/></Cell>
    <Cell><Data ss:Type="String">YGR268C</Data><NamedCell ss:Name="Print_Area"/></Cell>
    <Cell><Data ss:Type="String">twohybrid</Data><NamedCell ss:Name="Print_Area"/></Cell>
    <Cell><Data ss:Type="Number">11489916</Data><NamedCell ss:Name="Print_Area"/></Cell>
   </Row>
   <Row>
    <Cell><Data ss:Type="String">YBL007C</Data><NamedCell ss:Name="Print_Area"/></Cell>
    <Cell><Data ss:Type="String">YHR016C</Data><NamedCell ss:Name="Print_Area"/></Cell>
    <Cell><Data ss:Type="String">twohybrid</Data><NamedCell ss:Name="Print_Area"/></Cell>
    <Cell><Data ss:Type="Number">11743162</Data><NamedCell ss:Name="Print_Area"/></Cell>
   </Row>
   <Row>
    <Cell><Data ss:Type="String">YBL007C</Data><NamedCell ss:Name="Print_Area"/></Cell>
    <Cell><Data ss:Type="String">YHR016C</Data><NamedCell ss:Name="Print_Area"/></Cell>
    <Cell><Data ss:Type="String">twohybrid</Data><NamedCell ss:Name="Print_Area"/></Cell>
    <Cell><Data ss:Type="Number">11489916</Data><NamedCell ss:Name="Print_Area"/></Cell>
   </Row>
   <Row>
    <Cell><Data ss:Type="String">YBL007C</Data><NamedCell ss:Name="Print_Area"/></Cell>
    <Cell><Data ss:Type="String">YHR016C</Data><NamedCell ss:Name="Print_Area"/></Cell>
    <Cell><Data ss:Type="String">proteinpeptide</Data><NamedCell
      ss:Name="Print_Area"/></Cell>
    <Cell><Data ss:Type="Number">14737190</Data><NamedCell ss:Name="Print_Area"/></Cell>
   </Row>
   <Row>
    <Cell><Data ss:Type="String">YBL007C</Data><NamedCell ss:Name="Print_Area"/></Cell>
    <Cell><Data ss:Type="String">YHR016C</Data><NamedCell ss:Name="Print_Area"/></Cell>
    <Cell><Data ss:Type="String">twohybrid</Data><NamedCell ss:Name="Print_Area"/></Cell>
    <Cell><Data ss:Type="Number">10688190</Data><NamedCell ss:Name="Print_Area"/></Cell>
   </Row>
   <Row>
    <Cell><Data ss:Type="String">YBL007C</Data><NamedCell ss:Name="Print_Area"/></Cell>
    <Cell><Data ss:Type="String">YHR016C</Data><NamedCell ss:Name="Print_Area"/></Cell>
    <Cell><Data ss:Type="String">affinitycapturems</Data><NamedCell
      ss:Name="Print_Area"/></Cell>
    <Cell><Data ss:Type="Number">11805826</Data><NamedCell ss:Name="Print_Area"/></Cell>
   </Row>
   <Row>
    <Cell><Data ss:Type="String">YBL007C</Data><NamedCell ss:Name="Print_Area"/></Cell>
    <Cell><Data ss:Type="String">YHR016C</Data><NamedCell ss:Name="Print_Area"/></Cell>
    <Cell><Data ss:Type="String">twohybrid</Data><NamedCell ss:Name="Print_Area"/></Cell>
    <Cell><Data ss:Type="Number">12388763</Data><NamedCell ss:Name="Print_Area"/></Cell>
   </Row>
   <Row>
    <Cell><Data ss:Type="String">YBL007C</Data><NamedCell ss:Name="Print_Area"/></Cell>
    <Cell><Data ss:Type="String">YHR016C</Data><NamedCell ss:Name="Print_Area"/></Cell>
    <Cell><Data ss:Type="String">reconstitutedcomplex</Data><NamedCell
      ss:Name="Print_Area"/></Cell>
    <Cell><Data ss:Type="Number">12388763</Data><NamedCell ss:Name="Print_Area"/></Cell>
   </Row>
   <Row>
    <Cell><Data ss:Type="String">YBL007C</Data><NamedCell ss:Name="Print_Area"/></Cell>
    <Cell><Data ss:Type="String">YIL095W</Data><NamedCell ss:Name="Print_Area"/></Cell>
    <Cell><Data ss:Type="String">twohybrid</Data><NamedCell ss:Name="Print_Area"/></Cell>
    <Cell><Data ss:Type="Number">11739778</Data><NamedCell ss:Name="Print_Area"/></Cell>
   </Row>
   <Row>
    <Cell><Data ss:Type="String">YBL007C</Data><NamedCell ss:Name="Print_Area"/></Cell>
    <Cell><Data ss:Type="String">YIL095W</Data><NamedCell ss:Name="Print_Area"/></Cell>
    <Cell><Data ss:Type="String">unknown</Data><NamedCell ss:Name="Print_Area"/></Cell>
    <Cell><Data ss:Type="Number">11739778</Data><NamedCell ss:Name="Print_Area"/></Cell>
   </Row>
   <Row>
    <Cell><Data ss:Type="String">YBL007C</Data><NamedCell ss:Name="Print_Area"/></Cell>
    <Cell><Data ss:Type="String">YIL095W</Data><NamedCell ss:Name="Print_Area"/></Cell>
    <Cell><Data ss:Type="String">affinitycapturewestern</Data><NamedCell
      ss:Name="Print_Area"/></Cell>
    <Cell><Data ss:Type="Number">11739778</Data><NamedCell ss:Name="Print_Area"/></Cell>
   </Row>
   <Row>
    <Cell><Data ss:Type="String">YBL007C</Data><NamedCell ss:Name="Print_Area"/></Cell>
    <Cell><Data ss:Type="String">YIL095W</Data><NamedCell ss:Name="Print_Area"/></Cell>
    <Cell><Data ss:Type="String">reconstitutedcomplex</Data><NamedCell
      ss:Name="Print_Area"/></Cell>
    <Cell><Data ss:Type="Number">11739778</Data><NamedCell ss:Name="Print_Area"/></Cell>
   </Row>
   <Row>
    <Cell><Data ss:Type="String">YBL007C</Data><NamedCell ss:Name="Print_Area"/></Cell>
    <Cell><Data ss:Type="String">YIL095W</Data><NamedCell ss:Name="Print_Area"/></Cell>
    <Cell><Data ss:Type="String">biochemicalactivity</Data><NamedCell
      ss:Name="Print_Area"/></Cell>
    <Cell><Data ss:Type="Number">11739778</Data><NamedCell ss:Name="Print_Area"/></Cell>
   </Row>
   <Row>
    <Cell><Data ss:Type="String">YBL007C</Data><NamedCell ss:Name="Print_Area"/></Cell>
    <Cell><Data ss:Type="String">YIR006C</Data><NamedCell ss:Name="Print_Area"/></Cell>
    <Cell><Data ss:Type="String">unknown</Data><NamedCell ss:Name="Print_Area"/></Cell>
    <Cell><Data ss:Type="Number">11739778</Data><NamedCell ss:Name="Print_Area"/></Cell>
   </Row>
   <Row>
    <Cell><Data ss:Type="String">YBL007C</Data><NamedCell ss:Name="Print_Area"/></Cell>
    <Cell><Data ss:Type="String">YIR006C</Data><NamedCell ss:Name="Print_Area"/></Cell>
    <Cell><Data ss:Type="String">twohybrid</Data><NamedCell ss:Name="Print_Area"/></Cell>
    <Cell><Data ss:Type="Number">10594004</Data><NamedCell ss:Name="Print_Area"/></Cell>
   </Row>
   <Row>
    <Cell><Data ss:Type="String">YBL007C</Data><NamedCell ss:Name="Print_Area"/></Cell>
    <Cell><Data ss:Type="String">YIR006C</Data><NamedCell ss:Name="Print_Area"/></Cell>
    <Cell><Data ss:Type="String">affinitycapturewestern</Data><NamedCell
      ss:Name="Print_Area"/></Cell>
    <Cell><Data ss:Type="Number">10594004</Data><NamedCell ss:Name="Print_Area"/></Cell>
   </Row>
   <Row>
    <Cell><Data ss:Type="String">YBL007C</Data><NamedCell ss:Name="Print_Area"/></Cell>
    <Cell><Data ss:Type="String">YIR006C</Data><NamedCell ss:Name="Print_Area"/></Cell>
    <Cell><Data ss:Type="String">reconstitutedcomplex</Data><NamedCell
      ss:Name="Print_Area"/></Cell>
    <Cell><Data ss:Type="Number">10594004</Data><NamedCell ss:Name="Print_Area"/></Cell>
   </Row>
   <Row>
    <Cell><Data ss:Type="String">YBL007C</Data><NamedCell ss:Name="Print_Area"/></Cell>
    <Cell><Data ss:Type="String">YIR006C</Data><NamedCell ss:Name="Print_Area"/></Cell>
    <Cell><Data ss:Type="String">reconstitutedcomplex</Data><NamedCell
      ss:Name="Print_Area"/></Cell>
    <Cell><Data ss:Type="Number">11739778</Data><NamedCell ss:Name="Print_Area"/></Cell>
   </Row>
   <Row>
    <Cell><Data ss:Type="String">YBL007C</Data><NamedCell ss:Name="Print_Area"/></Cell>
    <Cell><Data ss:Type="String">YKR001C</Data><NamedCell ss:Name="Print_Area"/></Cell>
    <Cell><Data ss:Type="String">affinitycapturewestern</Data><NamedCell
      ss:Name="Print_Area"/></Cell>
    <Cell><Data ss:Type="Number">15265985</Data><NamedCell ss:Name="Print_Area"/></Cell>
   </Row>
   <Row>
    <Cell><Data ss:Type="String">YBL007C</Data><NamedCell ss:Name="Print_Area"/></Cell>
    <Cell><Data ss:Type="String">YKR001C</Data><NamedCell ss:Name="Print_Area"/></Cell>
    <Cell><Data ss:Type="String">twohybrid</Data><NamedCell ss:Name="Print_Area"/></Cell>
    <Cell><Data ss:Type="Number">15265985</Data><NamedCell ss:Name="Print_Area"/></Cell>
   </Row>
   <Row>
    <Cell><Data ss:Type="String">YBL007C</Data><NamedCell ss:Name="Print_Area"/></Cell>
    <Cell><Data ss:Type="String">YNL084C</Data><NamedCell ss:Name="Print_Area"/></Cell>
    <Cell><Data ss:Type="String">affinitycapturewestern</Data><NamedCell
      ss:Name="Print_Area"/></Cell>
    <Cell><Data ss:Type="Number">10594004</Data><NamedCell ss:Name="Print_Area"/></Cell>
   </Row>
   <Row>
    <Cell><Data ss:Type="String">YBL007C</Data><NamedCell ss:Name="Print_Area"/></Cell>
    <Cell><Data ss:Type="String">YNL084C</Data><NamedCell ss:Name="Print_Area"/></Cell>
    <Cell><Data ss:Type="String">reconstitutedcomplex</Data><NamedCell
      ss:Name="Print_Area"/></Cell>
    <Cell><Data ss:Type="Number">10594004</Data><NamedCell ss:Name="Print_Area"/></Cell>
   </Row>
   <Row>
    <Cell><Data ss:Type="String">YBL007C</Data><NamedCell ss:Name="Print_Area"/></Cell>
    <Cell><Data ss:Type="String">YNL084C</Data><NamedCell ss:Name="Print_Area"/></Cell>
    <Cell><Data ss:Type="String">twohybrid</Data><NamedCell ss:Name="Print_Area"/></Cell>
    <Cell><Data ss:Type="Number">10594004</Data><NamedCell ss:Name="Print_Area"/></Cell>
   </Row>
   <Row>
    <Cell><Data ss:Type="String">YBL007C</Data><NamedCell ss:Name="Print_Area"/></Cell>
    <Cell><Data ss:Type="String">YNL094W</Data><NamedCell ss:Name="Print_Area"/></Cell>
    <Cell><Data ss:Type="String">twohybrid</Data><NamedCell ss:Name="Print_Area"/></Cell>
    <Cell><Data ss:Type="Number">11489916</Data><NamedCell ss:Name="Print_Area"/></Cell>
   </Row>
   <Row>
    <Cell><Data ss:Type="String">YBL007C</Data><NamedCell ss:Name="Print_Area"/></Cell>
    <Cell><Data ss:Type="String">YNL094W</Data><NamedCell ss:Name="Print_Area"/></Cell>
    <Cell><Data ss:Type="String">proteinpeptide</Data><NamedCell
      ss:Name="Print_Area"/></Cell>
    <Cell><Data ss:Type="Number">11743162</Data><NamedCell ss:Name="Print_Area"/></Cell>
   </Row>
   <Row>
    <Cell><Data ss:Type="String">YBL007C</Data><NamedCell ss:Name="Print_Area"/></Cell>
    <Cell><Data ss:Type="String">YNL106C</Data><NamedCell ss:Name="Print_Area"/></Cell>
    <Cell><Data ss:Type="String">farwestern</Data><NamedCell ss:Name="Print_Area"/></Cell>
    <Cell><Data ss:Type="Number">14761940</Data><NamedCell ss:Name="Print_Area"/></Cell>
   </Row>
   <Row>
    <Cell><Data ss:Type="String">YBL007C</Data><NamedCell ss:Name="Print_Area"/></Cell>
    <Cell><Data ss:Type="String">YNL106C</Data><NamedCell ss:Name="Print_Area"/></Cell>
    <Cell><Data ss:Type="String">affinitycapturems</Data><NamedCell
      ss:Name="Print_Area"/></Cell>
    <Cell><Data ss:Type="Number">16429126</Data><NamedCell ss:Name="Print_Area"/></Cell>
   </Row>
   <Row>
    <Cell><Data ss:Type="String">YBL007C</Data><NamedCell ss:Name="Print_Area"/></Cell>
    <Cell><Data ss:Type="String">YNL106C</Data><NamedCell ss:Name="Print_Area"/></Cell>
    <Cell><Data ss:Type="String">affinitycapturems</Data><NamedCell
      ss:Name="Print_Area"/></Cell>
    <Cell><Data ss:Type="Number">11805826</Data><NamedCell ss:Name="Print_Area"/></Cell>
   </Row>
   <Row>
    <Cell><Data ss:Type="String">YBL007C</Data><NamedCell ss:Name="Print_Area"/></Cell>
    <Cell><Data ss:Type="String">YNL106C</Data><NamedCell ss:Name="Print_Area"/></Cell>
    <Cell><Data ss:Type="String">affinitycapturewestern</Data><NamedCell
      ss:Name="Print_Area"/></Cell>
    <Cell><Data ss:Type="Number">14761940</Data><NamedCell ss:Name="Print_Area"/></Cell>
   </Row>
   <Row>
    <Cell><Data ss:Type="String">YBL007C</Data><NamedCell ss:Name="Print_Area"/></Cell>
    <Cell><Data ss:Type="String">YNL238W</Data><NamedCell ss:Name="Print_Area"/></Cell>
    <Cell><Data ss:Type="String">proteinpeptide</Data><NamedCell
      ss:Name="Print_Area"/></Cell>
    <Cell><Data ss:Type="Number">11940605</Data><NamedCell ss:Name="Print_Area"/></Cell>
   </Row>
   <Row>
    <Cell><Data ss:Type="String">YBL007C</Data><NamedCell ss:Name="Print_Area"/></Cell>
    <Cell><Data ss:Type="String">YNL238W</Data><NamedCell ss:Name="Print_Area"/></Cell>
    <Cell><Data ss:Type="String">unknown</Data><NamedCell ss:Name="Print_Area"/></Cell>
    <Cell><Data ss:Type="Number">11940605</Data><NamedCell ss:Name="Print_Area"/></Cell>
   </Row>
   <Row>
    <Cell><Data ss:Type="String">YBL007C</Data><NamedCell ss:Name="Print_Area"/></Cell>
    <Cell><Data ss:Type="String">YNL238W</Data><NamedCell ss:Name="Print_Area"/></Cell>
    <Cell><Data ss:Type="String">twohybrid</Data><NamedCell ss:Name="Print_Area"/></Cell>
    <Cell><Data ss:Type="Number">11940605</Data><NamedCell ss:Name="Print_Area"/></Cell>
   </Row>
   <Row>
    <Cell><Data ss:Type="String">YBL007C</Data><NamedCell ss:Name="Print_Area"/></Cell>
    <Cell><Data ss:Type="String">YNL238W</Data><NamedCell ss:Name="Print_Area"/></Cell>
    <Cell><Data ss:Type="String">reconstitutedcomplex</Data><NamedCell
      ss:Name="Print_Area"/></Cell>
    <Cell><Data ss:Type="Number">11940605</Data><NamedCell ss:Name="Print_Area"/></Cell>
   </Row>
   <Row>
    <Cell><Data ss:Type="String">YBL007C</Data><NamedCell ss:Name="Print_Area"/></Cell>
    <Cell><Data ss:Type="String">YNL243W</Data><NamedCell ss:Name="Print_Area"/></Cell>
    <Cell><Data ss:Type="String">twohybrid</Data><NamedCell ss:Name="Print_Area"/></Cell>
    <Cell><Data ss:Type="Number">12734398</Data><NamedCell ss:Name="Print_Area"/></Cell>
   </Row>
   <Row>
    <Cell><Data ss:Type="String">YBL007C</Data><NamedCell ss:Name="Print_Area"/></Cell>
    <Cell><Data ss:Type="String">YNL243W</Data><NamedCell ss:Name="Print_Area"/></Cell>
    <Cell><Data ss:Type="String">reconstitutedcomplex</Data><NamedCell
      ss:Name="Print_Area"/></Cell>
    <Cell><Data ss:Type="Number">12734398</Data><NamedCell ss:Name="Print_Area"/></Cell>
   </Row>
   <Row>
    <Cell><Data ss:Type="String">YBL007C</Data><NamedCell ss:Name="Print_Area"/></Cell>
    <Cell><Data ss:Type="String">YNL243W</Data><NamedCell ss:Name="Print_Area"/></Cell>
    <Cell><Data ss:Type="String">unknown</Data><NamedCell ss:Name="Print_Area"/></Cell>
    <Cell><Data ss:Type="Number">12734398</Data><NamedCell ss:Name="Print_Area"/></Cell>
   </Row>
   <Row>
    <Cell><Data ss:Type="String">YBL007C</Data><NamedCell ss:Name="Print_Area"/></Cell>
    <Cell><Data ss:Type="String">YNL243W</Data><NamedCell ss:Name="Print_Area"/></Cell>
    <Cell><Data ss:Type="String">colocalization</Data><NamedCell
      ss:Name="Print_Area"/></Cell>
    <Cell><Data ss:Type="Number">12734398</Data><NamedCell ss:Name="Print_Area"/></Cell>
   </Row>
   <Row>
    <Cell><Data ss:Type="String">YBL007C</Data><NamedCell ss:Name="Print_Area"/></Cell>
    <Cell><Data ss:Type="String">YNL243W</Data><NamedCell ss:Name="Print_Area"/></Cell>
    <Cell><Data ss:Type="String">affinitycapturewestern</Data><NamedCell
      ss:Name="Print_Area"/></Cell>
    <Cell><Data ss:Type="Number">12734398</Data><NamedCell ss:Name="Print_Area"/></Cell>
   </Row>
   <Row>
    <Cell><Data ss:Type="String">YBL007C</Data><NamedCell ss:Name="Print_Area"/></Cell>
    <Cell><Data ss:Type="String">YOR181W</Data><NamedCell ss:Name="Print_Area"/></Cell>
    <Cell><Data ss:Type="String">affinitycapturems</Data><NamedCell
      ss:Name="Print_Area"/></Cell>
    <Cell><Data ss:Type="Number">16554755</Data><NamedCell ss:Name="Print_Area"/></Cell>
   </Row>
   <Row>
    <Cell><Data ss:Type="String">YBL007C</Data><NamedCell ss:Name="Print_Area"/></Cell>
    <Cell><Data ss:Type="String">YOR181W</Data><NamedCell ss:Name="Print_Area"/></Cell>
    <Cell><Data ss:Type="String">affinitycapturewestern</Data><NamedCell
      ss:Name="Print_Area"/></Cell>
    <Cell><Data ss:Type="Number">11950888</Data><NamedCell ss:Name="Print_Area"/></Cell>
   </Row>
   <Row>
    <Cell><Data ss:Type="String">YBL007C</Data><NamedCell ss:Name="Print_Area"/></Cell>
    <Cell><Data ss:Type="String">YOR181W</Data><NamedCell ss:Name="Print_Area"/></Cell>
    <Cell><Data ss:Type="String">affinitycapturems</Data><NamedCell
      ss:Name="Print_Area"/></Cell>
    <Cell><Data ss:Type="Number">11805837</Data><NamedCell ss:Name="Print_Area"/></Cell>
   </Row>
   <Row>
    <Cell><Data ss:Type="String">YBL007C</Data><NamedCell ss:Name="Print_Area"/></Cell>
    <Cell><Data ss:Type="String">YOR181W</Data><NamedCell ss:Name="Print_Area"/></Cell>
    <Cell><Data ss:Type="String">reconstitutedcomplex</Data><NamedCell
      ss:Name="Print_Area"/></Cell>
    <Cell><Data ss:Type="Number">11950888</Data><NamedCell ss:Name="Print_Area"/></Cell>
   </Row>
   <Row>
    <Cell><Data ss:Type="String">YBL007C</Data><NamedCell ss:Name="Print_Area"/></Cell>
    <Cell><Data ss:Type="String">YOR181W</Data><NamedCell ss:Name="Print_Area"/></Cell>
    <Cell><Data ss:Type="String">biochemicalactivity</Data><NamedCell
      ss:Name="Print_Area"/></Cell>
    <Cell><Data ss:Type="Number">12814545</Data><NamedCell ss:Name="Print_Area"/></Cell>
   </Row>
   <Row>
    <Cell><Data ss:Type="String">YBL007C</Data><NamedCell ss:Name="Print_Area"/></Cell>
    <Cell><Data ss:Type="String">YOR181W</Data><NamedCell ss:Name="Print_Area"/></Cell>
    <Cell><Data ss:Type="String">affinitycapturewestern</Data><NamedCell
      ss:Name="Print_Area"/></Cell>
    <Cell><Data ss:Type="Number">9024694</Data><NamedCell ss:Name="Print_Area"/></Cell>
   </Row>
   <Row>
    <Cell><Data ss:Type="String">YBL007C</Data><NamedCell ss:Name="Print_Area"/></Cell>
    <Cell><Data ss:Type="String">YOR181W</Data><NamedCell ss:Name="Print_Area"/></Cell>
    <Cell><Data ss:Type="String">twohybrid</Data><NamedCell ss:Name="Print_Area"/></Cell>
    <Cell><Data ss:Type="Number">11489916</Data><NamedCell ss:Name="Print_Area"/></Cell>
   </Row>
   <Row>
    <Cell><Data ss:Type="String">YBL007C</Data><NamedCell ss:Name="Print_Area"/></Cell>
    <Cell><Data ss:Type="String">YOR181W</Data><NamedCell ss:Name="Print_Area"/></Cell>
    <Cell><Data ss:Type="String">affinitycapturems</Data><NamedCell
      ss:Name="Print_Area"/></Cell>
    <Cell><Data ss:Type="Number">16429126</Data><NamedCell ss:Name="Print_Area"/></Cell>
   </Row>
   <Row>
    <Cell><Data ss:Type="String">YBL007C</Data><NamedCell ss:Name="Print_Area"/></Cell>
    <Cell><Data ss:Type="String">YOR181W</Data><NamedCell ss:Name="Print_Area"/></Cell>
    <Cell><Data ss:Type="String">proteinpeptide</Data><NamedCell
      ss:Name="Print_Area"/></Cell>
    <Cell><Data ss:Type="Number">11743162</Data><NamedCell ss:Name="Print_Area"/></Cell>
   </Row>
   <Row>
    <Cell><Data ss:Type="String">YBL007C</Data><NamedCell ss:Name="Print_Area"/></Cell>
    <Cell><Data ss:Type="String">YOR181W</Data><NamedCell ss:Name="Print_Area"/></Cell>
    <Cell><Data ss:Type="String">affinitycapturems</Data><NamedCell
      ss:Name="Print_Area"/></Cell>
    <Cell><Data ss:Type="Number">11805826</Data><NamedCell ss:Name="Print_Area"/></Cell>
   </Row>
   <Row>
    <Cell><Data ss:Type="String">YBL007C</Data><NamedCell ss:Name="Print_Area"/></Cell>
    <Cell><Data ss:Type="String">YPR171W</Data><NamedCell ss:Name="Print_Area"/></Cell>
    <Cell><Data ss:Type="String">affinitycapturems</Data><NamedCell
      ss:Name="Print_Area"/></Cell>
    <Cell><Data ss:Type="Number">11805826</Data><NamedCell ss:Name="Print_Area"/></Cell>
   </Row>
   <Row>
    <Cell><Data ss:Type="String">YBL007C</Data><NamedCell ss:Name="Print_Area"/></Cell>
    <Cell><Data ss:Type="String">YPR171W</Data><NamedCell ss:Name="Print_Area"/></Cell>
    <Cell><Data ss:Type="String">twohybrid</Data><NamedCell ss:Name="Print_Area"/></Cell>
    <Cell><Data ss:Type="Number">11489916</Data><NamedCell ss:Name="Print_Area"/></Cell>
   </Row>
   <Row>
    <Cell><Data ss:Type="String">YBL007C</Data><NamedCell ss:Name="Print_Area"/></Cell>
    <Cell><Data ss:Type="String">YPR171W</Data><NamedCell ss:Name="Print_Area"/></Cell>
    <Cell><Data ss:Type="String">affinitycapturems</Data><NamedCell
      ss:Name="Print_Area"/></Cell>
    <Cell><Data ss:Type="Number">16429126</Data><NamedCell ss:Name="Print_Area"/></Cell>
   </Row>
   <Row>
    <Cell><Data ss:Type="String">YBL007C</Data><NamedCell ss:Name="Print_Area"/></Cell>
    <Cell><Data ss:Type="String">YPR171W</Data><NamedCell ss:Name="Print_Area"/></Cell>
    <Cell><Data ss:Type="String">twohybrid</Data><NamedCell ss:Name="Print_Area"/></Cell>
    <Cell><Data ss:Type="Number">11743162</Data><NamedCell ss:Name="Print_Area"/></Cell>
   </Row>
   <Row>
    <Cell><Data ss:Type="String">YBL008W</Data><NamedCell ss:Name="Print_Area"/></Cell>
    <Cell><Data ss:Type="String">YGR063C</Data><NamedCell ss:Name="Print_Area"/></Cell>
    <Cell><Data ss:Type="String">affinitycapturewestern</Data><NamedCell
      ss:Name="Print_Area"/></Cell>
    <Cell><Data ss:Type="Number">9504914</Data><NamedCell ss:Name="Print_Area"/></Cell>
   </Row>
   <Row>
    <Cell><Data ss:Type="String">YBL008W</Data><NamedCell ss:Name="Print_Area"/></Cell>
    <Cell><Data ss:Type="String">YGR063C</Data><NamedCell ss:Name="Print_Area"/></Cell>
    <Cell><Data ss:Type="String">unknown</Data><NamedCell ss:Name="Print_Area"/></Cell>
    <Cell><Data ss:Type="Number">9504914</Data><NamedCell ss:Name="Print_Area"/></Cell>
   </Row>
   <Row>
    <Cell><Data ss:Type="String">YBL008W</Data><NamedCell ss:Name="Print_Area"/></Cell>
    <Cell><Data ss:Type="String">YJL115W</Data><NamedCell ss:Name="Print_Area"/></Cell>
    <Cell><Data ss:Type="String">reconstitutedcomplex</Data><NamedCell
      ss:Name="Print_Area"/></Cell>
    <Cell><Data ss:Type="Number">11412995</Data><NamedCell ss:Name="Print_Area"/></Cell>
   </Row>
   <Row>
    <Cell><Data ss:Type="String">YBL008W</Data><NamedCell ss:Name="Print_Area"/></Cell>
    <Cell><Data ss:Type="String">YJL115W</Data><NamedCell ss:Name="Print_Area"/></Cell>
    <Cell><Data ss:Type="String">twohybrid</Data><NamedCell ss:Name="Print_Area"/></Cell>
    <Cell><Data ss:Type="Number">11404324</Data><NamedCell ss:Name="Print_Area"/></Cell>
   </Row>
   <Row>
    <Cell><Data ss:Type="String">YBL008W</Data><NamedCell ss:Name="Print_Area"/></Cell>
    <Cell><Data ss:Type="String">YJL115W</Data><NamedCell ss:Name="Print_Area"/></Cell>
    <Cell><Data ss:Type="String">affinitycapturewestern</Data><NamedCell
      ss:Name="Print_Area"/></Cell>
    <Cell><Data ss:Type="Number">11412995</Data><NamedCell ss:Name="Print_Area"/></Cell>
   </Row>
   <Row>
    <Cell><Data ss:Type="String">YBL008W</Data><NamedCell ss:Name="Print_Area"/></Cell>
    <Cell><Data ss:Type="String">YOR038C</Data><NamedCell ss:Name="Print_Area"/></Cell>
    <Cell><Data ss:Type="String">affinitycapturewestern</Data><NamedCell
      ss:Name="Print_Area"/></Cell>
    <Cell><Data ss:Type="Number">9504914</Data><NamedCell ss:Name="Print_Area"/></Cell>
   </Row>
   <Row>
    <Cell><Data ss:Type="String">YBL008W</Data><NamedCell ss:Name="Print_Area"/></Cell>
    <Cell><Data ss:Type="String">YOR038C</Data><NamedCell ss:Name="Print_Area"/></Cell>
    <Cell><Data ss:Type="String">unknown</Data><NamedCell ss:Name="Print_Area"/></Cell>
    <Cell><Data ss:Type="Number">9504914</Data><NamedCell ss:Name="Print_Area"/></Cell>
   </Row>
   <Row>
    <Cell><Data ss:Type="String">YBL013W</Data><NamedCell ss:Name="Print_Area"/></Cell>
    <Cell><Data ss:Type="String">YBR160W</Data><NamedCell ss:Name="Print_Area"/></Cell>
    <Cell><Data ss:Type="String">biochemicalactivity</Data><NamedCell
      ss:Name="Print_Area"/></Cell>
    <Cell><Data ss:Type="Number">14574415</Data><NamedCell ss:Name="Print_Area"/></Cell>
   </Row>
   <Row>
    <Cell><Data ss:Type="String">YBL013W</Data><NamedCell ss:Name="Print_Area"/></Cell>
    <Cell><Data ss:Type="String">YBR160W</Data><NamedCell ss:Name="Print_Area"/></Cell>
    <Cell><Data ss:Type="String">reconstitutedcomplex</Data><NamedCell
      ss:Name="Print_Area"/></Cell>
    <Cell><Data ss:Type="Number">14574415</Data><NamedCell ss:Name="Print_Area"/></Cell>
   </Row>
   <Row>
    <Cell><Data ss:Type="String">YBL014C</Data><NamedCell ss:Name="Print_Area"/></Cell>
    <Cell><Data ss:Type="String">YER148W</Data><NamedCell ss:Name="Print_Area"/></Cell>
    <Cell><Data ss:Type="String">twohybrid</Data><NamedCell ss:Name="Print_Area"/></Cell>
    <Cell><Data ss:Type="Number">8895657</Data><NamedCell ss:Name="Print_Area"/></Cell>
   </Row>
   <Row>
    <Cell><Data ss:Type="String">YBL014C</Data><NamedCell ss:Name="Print_Area"/></Cell>
    <Cell><Data ss:Type="String">YER148W</Data><NamedCell ss:Name="Print_Area"/></Cell>
    <Cell><Data ss:Type="String">reconstitutedcomplex</Data><NamedCell
      ss:Name="Print_Area"/></Cell>
    <Cell><Data ss:Type="Number">8895657</Data><NamedCell ss:Name="Print_Area"/></Cell>
   </Row>
   <Row>
    <Cell><Data ss:Type="String">YBL014C</Data><NamedCell ss:Name="Print_Area"/></Cell>
    <Cell><Data ss:Type="String">YJL025W</Data><NamedCell ss:Name="Print_Area"/></Cell>
    <Cell><Data ss:Type="String">affinitycapturewestern</Data><NamedCell
      ss:Name="Print_Area"/></Cell>
    <Cell><Data ss:Type="Number">8702872</Data><NamedCell ss:Name="Print_Area"/></Cell>
   </Row>
   <Row>
    <Cell><Data ss:Type="String">YBL014C</Data><NamedCell ss:Name="Print_Area"/></Cell>
    <Cell><Data ss:Type="String">YJL025W</Data><NamedCell ss:Name="Print_Area"/></Cell>
    <Cell><Data ss:Type="String">twohybrid</Data><NamedCell ss:Name="Print_Area"/></Cell>
    <Cell><Data ss:Type="Number">10688190</Data><NamedCell ss:Name="Print_Area"/></Cell>
   </Row>
   <Row>
    <Cell><Data ss:Type="String">YBL014C</Data><NamedCell ss:Name="Print_Area"/></Cell>
    <Cell><Data ss:Type="String">YJL025W</Data><NamedCell ss:Name="Print_Area"/></Cell>
    <Cell><Data ss:Type="String">affinitycapturewestern</Data><NamedCell
      ss:Name="Print_Area"/></Cell>
    <Cell><Data ss:Type="Number">9837969</Data><NamedCell ss:Name="Print_Area"/></Cell>
   </Row>
   <Row>
    <Cell><Data ss:Type="String">YBL014C</Data><NamedCell ss:Name="Print_Area"/></Cell>
    <Cell><Data ss:Type="String">YJL025W</Data><NamedCell ss:Name="Print_Area"/></Cell>
    <Cell><Data ss:Type="String">reconstitutedcomplex</Data><NamedCell
      ss:Name="Print_Area"/></Cell>
    <Cell><Data ss:Type="Number">8702872</Data><NamedCell ss:Name="Print_Area"/></Cell>
   </Row>
   <Row>
    <Cell><Data ss:Type="String">YBL014C</Data><NamedCell ss:Name="Print_Area"/></Cell>
    <Cell><Data ss:Type="String">YJL025W</Data><NamedCell ss:Name="Print_Area"/></Cell>
    <Cell><Data ss:Type="String">copurification</Data><NamedCell
      ss:Name="Print_Area"/></Cell>
    <Cell><Data ss:Type="Number">7958901</Data><NamedCell ss:Name="Print_Area"/></Cell>
   </Row>
   <Row>
    <Cell><Data ss:Type="String">YBL014C</Data><NamedCell ss:Name="Print_Area"/></Cell>
    <Cell><Data ss:Type="String">YJL025W</Data><NamedCell ss:Name="Print_Area"/></Cell>
    <Cell><Data ss:Type="String">affinitycapturems</Data><NamedCell
      ss:Name="Print_Area"/></Cell>
    <Cell><Data ss:Type="Number">16554755</Data><NamedCell ss:Name="Print_Area"/></Cell>
   </Row>
   <Row>
    <Cell><Data ss:Type="String">YBL014C</Data><NamedCell ss:Name="Print_Area"/></Cell>
    <Cell><Data ss:Type="String">YJL025W</Data><NamedCell ss:Name="Print_Area"/></Cell>
    <Cell><Data ss:Type="String">affinitycapturewestern</Data><NamedCell
      ss:Name="Print_Area"/></Cell>
    <Cell><Data ss:Type="Number">7958901</Data><NamedCell ss:Name="Print_Area"/></Cell>
   </Row>
   <Row>
    <Cell><Data ss:Type="String">YBL014C</Data><NamedCell ss:Name="Print_Area"/></Cell>
    <Cell><Data ss:Type="String">YJL025W</Data><NamedCell ss:Name="Print_Area"/></Cell>
    <Cell><Data ss:Type="String">twohybrid</Data><NamedCell ss:Name="Print_Area"/></Cell>
    <Cell><Data ss:Type="Number">8887672</Data><NamedCell ss:Name="Print_Area"/></Cell>
   </Row>
   <Row>
    <Cell><Data ss:Type="String">YBL014C</Data><NamedCell ss:Name="Print_Area"/></Cell>
    <Cell><Data ss:Type="String">YKL125W</Data><NamedCell ss:Name="Print_Area"/></Cell>
    <Cell><Data ss:Type="String">affinitycapturewestern</Data><NamedCell
      ss:Name="Print_Area"/></Cell>
    <Cell><Data ss:Type="Number">11032814</Data><NamedCell ss:Name="Print_Area"/></Cell>
   </Row>
   <Row>
    <Cell><Data ss:Type="String">YBL014C</Data><NamedCell ss:Name="Print_Area"/></Cell>
    <Cell><Data ss:Type="String">YKL125W</Data><NamedCell ss:Name="Print_Area"/></Cell>
    <Cell><Data ss:Type="String">twohybrid</Data><NamedCell ss:Name="Print_Area"/></Cell>
    <Cell><Data ss:Type="Number">11032814</Data><NamedCell ss:Name="Print_Area"/></Cell>
   </Row>
   <Row>
    <Cell><Data ss:Type="String">YBL014C</Data><NamedCell ss:Name="Print_Area"/></Cell>
    <Cell><Data ss:Type="String">YML043C</Data><NamedCell ss:Name="Print_Area"/></Cell>
    <Cell><Data ss:Type="String">twohybrid</Data><NamedCell ss:Name="Print_Area"/></Cell>
    <Cell><Data ss:Type="Number">8887672</Data><NamedCell ss:Name="Print_Area"/></Cell>
   </Row>
   <Row>
    <Cell><Data ss:Type="String">YBL014C</Data><NamedCell ss:Name="Print_Area"/></Cell>
    <Cell><Data ss:Type="String">YML043C</Data><NamedCell ss:Name="Print_Area"/></Cell>
    <Cell><Data ss:Type="String">unknown</Data><NamedCell ss:Name="Print_Area"/></Cell>
    <Cell><Data ss:Type="Number">8702872</Data><NamedCell ss:Name="Print_Area"/></Cell>
   </Row>
   <Row>
    <Cell><Data ss:Type="String">YBL014C</Data><NamedCell ss:Name="Print_Area"/></Cell>
    <Cell><Data ss:Type="String">YML043C</Data><NamedCell ss:Name="Print_Area"/></Cell>
    <Cell><Data ss:Type="String">unknown</Data><NamedCell ss:Name="Print_Area"/></Cell>
    <Cell><Data ss:Type="Number">8887672</Data><NamedCell ss:Name="Print_Area"/></Cell>
   </Row>
   <Row>
    <Cell><Data ss:Type="String">YBL014C</Data><NamedCell ss:Name="Print_Area"/></Cell>
    <Cell><Data ss:Type="String">YML043C</Data><NamedCell ss:Name="Print_Area"/></Cell>
    <Cell><Data ss:Type="String">affinitycapturewestern</Data><NamedCell
      ss:Name="Print_Area"/></Cell>
    <Cell><Data ss:Type="Number">8702872</Data><NamedCell ss:Name="Print_Area"/></Cell>
   </Row>
   <Row>
    <Cell><Data ss:Type="String">YBL016W</Data><NamedCell ss:Name="Print_Area"/></Cell>
    <Cell><Data ss:Type="String">YBR083W</Data><NamedCell ss:Name="Print_Area"/></Cell>
    <Cell><Data ss:Type="String">affinitycapturewestern</Data><NamedCell
      ss:Name="Print_Area"/></Cell>
    <Cell><Data ss:Type="Number">15558284</Data><NamedCell ss:Name="Print_Area"/></Cell>
   </Row>
   <Row>
    <Cell><Data ss:Type="String">YBL016W</Data><NamedCell ss:Name="Print_Area"/></Cell>
    <Cell><Data ss:Type="String">YBR083W</Data><NamedCell ss:Name="Print_Area"/></Cell>
    <Cell><Data ss:Type="String">biochemicalactivity</Data><NamedCell
      ss:Name="Print_Area"/></Cell>
    <Cell><Data ss:Type="Number">15620356</Data><NamedCell ss:Name="Print_Area"/></Cell>
   </Row>
   <Row>
    <Cell><Data ss:Type="String">YBL016W</Data><NamedCell ss:Name="Print_Area"/></Cell>
    <Cell><Data ss:Type="String">YBR083W</Data><NamedCell ss:Name="Print_Area"/></Cell>
    <Cell><Data ss:Type="String">affinitycapturewestern</Data><NamedCell
      ss:Name="Print_Area"/></Cell>
    <Cell><Data ss:Type="Number">15620357</Data><NamedCell ss:Name="Print_Area"/></Cell>
   </Row>
   <Row>
    <Cell><Data ss:Type="String">YBL016W</Data><NamedCell ss:Name="Print_Area"/></Cell>
    <Cell><Data ss:Type="String">YBR083W</Data><NamedCell ss:Name="Print_Area"/></Cell>
    <Cell><Data ss:Type="String">biochemicalactivity</Data><NamedCell
      ss:Name="Print_Area"/></Cell>
    <Cell><Data ss:Type="Number">15558284</Data><NamedCell ss:Name="Print_Area"/></Cell>
   </Row>
   <Row>
    <Cell><Data ss:Type="String">YBL016W</Data><NamedCell ss:Name="Print_Area"/></Cell>
    <Cell><Data ss:Type="String">YDL159W</Data><NamedCell ss:Name="Print_Area"/></Cell>
    <Cell><Data ss:Type="String">twohybrid</Data><NamedCell ss:Name="Print_Area"/></Cell>
    <Cell><Data ss:Type="Number">8052657</Data><NamedCell ss:Name="Print_Area"/></Cell>
   </Row>
   <Row>
    <Cell><Data ss:Type="String">YBL016W</Data><NamedCell ss:Name="Print_Area"/></Cell>
    <Cell><Data ss:Type="String">YDL159W</Data><NamedCell ss:Name="Print_Area"/></Cell>
    <Cell><Data ss:Type="String">affinitycapturewestern</Data><NamedCell
      ss:Name="Print_Area"/></Cell>
    <Cell><Data ss:Type="Number">8668180</Data><NamedCell ss:Name="Print_Area"/></Cell>
   </Row>
   <Row>
    <Cell><Data ss:Type="String">YBL016W</Data><NamedCell ss:Name="Print_Area"/></Cell>
    <Cell><Data ss:Type="String">YDL159W</Data><NamedCell ss:Name="Print_Area"/></Cell>
    <Cell><Data ss:Type="String">twohybrid</Data><NamedCell ss:Name="Print_Area"/></Cell>
    <Cell><Data ss:Type="Number">11921098</Data><NamedCell ss:Name="Print_Area"/></Cell>
   </Row>
   <Row>
    <Cell><Data ss:Type="String">YBL016W</Data><NamedCell ss:Name="Print_Area"/></Cell>
    <Cell><Data ss:Type="String">YDL159W</Data><NamedCell ss:Name="Print_Area"/></Cell>
    <Cell><Data ss:Type="String">biochemicalactivity</Data><NamedCell
      ss:Name="Print_Area"/></Cell>
    <Cell><Data ss:Type="Number">15456892</Data><NamedCell ss:Name="Print_Area"/></Cell>
   </Row>
   <Row>
    <Cell><Data ss:Type="String">YBL016W</Data><NamedCell ss:Name="Print_Area"/></Cell>
    <Cell><Data ss:Type="String">YDL159W</Data><NamedCell ss:Name="Print_Area"/></Cell>
    <Cell><Data ss:Type="String">reconstitutedcomplex</Data><NamedCell
      ss:Name="Print_Area"/></Cell>
    <Cell><Data ss:Type="Number">14734536</Data><NamedCell ss:Name="Print_Area"/></Cell>
   </Row>
   <Row>
    <Cell><Data ss:Type="String">YBL016W</Data><NamedCell ss:Name="Print_Area"/></Cell>
    <Cell><Data ss:Type="String">YDL159W</Data><NamedCell ss:Name="Print_Area"/></Cell>
    <Cell><Data ss:Type="String">unknown</Data><NamedCell ss:Name="Print_Area"/></Cell>
    <Cell><Data ss:Type="Number">7851759</Data><NamedCell ss:Name="Print_Area"/></Cell>
   </Row>
   <Row>
    <Cell><Data ss:Type="String">YBL016W</Data><NamedCell ss:Name="Print_Area"/></Cell>
    <Cell><Data ss:Type="String">YDL159W</Data><NamedCell ss:Name="Print_Area"/></Cell>
    <Cell><Data ss:Type="String">reconstitutedcomplex</Data><NamedCell
      ss:Name="Print_Area"/></Cell>
    <Cell><Data ss:Type="Number">11525741</Data><NamedCell ss:Name="Print_Area"/></Cell>
   </Row>
   <Row>
    <Cell><Data ss:Type="String">YBL016W</Data><NamedCell ss:Name="Print_Area"/></Cell>
    <Cell><Data ss:Type="String">YDL159W</Data><NamedCell ss:Name="Print_Area"/></Cell>
    <Cell><Data ss:Type="String">biochemicalactivity</Data><NamedCell
      ss:Name="Print_Area"/></Cell>
    <Cell><Data ss:Type="Number">8384702</Data><NamedCell ss:Name="Print_Area"/></Cell>
   </Row>
   <Row>
    <Cell><Data ss:Type="String">YBL016W</Data><NamedCell ss:Name="Print_Area"/></Cell>
    <Cell><Data ss:Type="String">YDL159W</Data><NamedCell ss:Name="Print_Area"/></Cell>
    <Cell><Data ss:Type="String">twohybrid</Data><NamedCell ss:Name="Print_Area"/></Cell>
    <Cell><Data ss:Type="Number">7851759</Data><NamedCell ss:Name="Print_Area"/></Cell>
   </Row>
   <Row>
    <Cell><Data ss:Type="String">YBL016W</Data><NamedCell ss:Name="Print_Area"/></Cell>
    <Cell><Data ss:Type="String">YDL159W</Data><NamedCell ss:Name="Print_Area"/></Cell>
    <Cell><Data ss:Type="String">biochemicalactivity</Data><NamedCell
      ss:Name="Print_Area"/></Cell>
    <Cell><Data ss:Type="Number">8159759</Data><NamedCell ss:Name="Print_Area"/></Cell>
   </Row>
   <Row>
    <Cell><Data ss:Type="String">YBL016W</Data><NamedCell ss:Name="Print_Area"/></Cell>
    <Cell><Data ss:Type="String">YDL159W</Data><NamedCell ss:Name="Print_Area"/></Cell>
    <Cell><Data ss:Type="String">twohybrid</Data><NamedCell ss:Name="Print_Area"/></Cell>
    <Cell><Data ss:Type="Number">15020407</Data><NamedCell ss:Name="Print_Area"/></Cell>
   </Row>
   <Row>
    <Cell><Data ss:Type="String">YBL016W</Data><NamedCell ss:Name="Print_Area"/></Cell>
    <Cell><Data ss:Type="String">YDL159W</Data><NamedCell ss:Name="Print_Area"/></Cell>
    <Cell><Data ss:Type="String">reconstitutedcomplex</Data><NamedCell
      ss:Name="Print_Area"/></Cell>
    <Cell><Data ss:Type="Number">15456892</Data><NamedCell ss:Name="Print_Area"/></Cell>
   </Row>
   <Row>
    <Cell><Data ss:Type="String">YBL016W</Data><NamedCell ss:Name="Print_Area"/></Cell>
    <Cell><Data ss:Type="String">YDL159W</Data><NamedCell ss:Name="Print_Area"/></Cell>
    <Cell><Data ss:Type="String">biochemicalactivity</Data><NamedCell
      ss:Name="Print_Area"/></Cell>
    <Cell><Data ss:Type="Number">8455599</Data><NamedCell ss:Name="Print_Area"/></Cell>
   </Row>
   <Row>
    <Cell><Data ss:Type="String">YBL016W</Data><NamedCell ss:Name="Print_Area"/></Cell>
    <Cell><Data ss:Type="String">YDL159W</Data><NamedCell ss:Name="Print_Area"/></Cell>
    <Cell><Data ss:Type="String">affinitycapturewestern</Data><NamedCell
      ss:Name="Print_Area"/></Cell>
    <Cell><Data ss:Type="Number">15456892</Data><NamedCell ss:Name="Print_Area"/></Cell>
   </Row>
   <Row>
    <Cell><Data ss:Type="String">YBL016W</Data><NamedCell ss:Name="Print_Area"/></Cell>
    <Cell><Data ss:Type="String">YDL159W</Data><NamedCell ss:Name="Print_Area"/></Cell>
    <Cell><Data ss:Type="String">reconstitutedcomplex</Data><NamedCell
      ss:Name="Print_Area"/></Cell>
    <Cell><Data ss:Type="Number">11134045</Data><NamedCell ss:Name="Print_Area"/></Cell>
   </Row>
   <Row>
    <Cell><Data ss:Type="String">YBL016W</Data><NamedCell ss:Name="Print_Area"/></Cell>
    <Cell><Data ss:Type="String">YDL159W</Data><NamedCell ss:Name="Print_Area"/></Cell>
    <Cell><Data ss:Type="String">reconstitutedcomplex</Data><NamedCell
      ss:Name="Print_Area"/></Cell>
    <Cell><Data ss:Type="Number">8668180</Data><NamedCell ss:Name="Print_Area"/></Cell>
   </Row>
   <Row>
    <Cell><Data ss:Type="String">YBL016W</Data><NamedCell ss:Name="Print_Area"/></Cell>
    <Cell><Data ss:Type="String">YDL159W</Data><NamedCell ss:Name="Print_Area"/></Cell>
    <Cell><Data ss:Type="String">unknown</Data><NamedCell ss:Name="Print_Area"/></Cell>
    <Cell><Data ss:Type="Number">8668180</Data><NamedCell ss:Name="Print_Area"/></Cell>
   </Row>
   <Row>
    <Cell><Data ss:Type="String">YBL016W</Data><NamedCell ss:Name="Print_Area"/></Cell>
    <Cell><Data ss:Type="String">YDR103W</Data><NamedCell ss:Name="Print_Area"/></Cell>
    <Cell><Data ss:Type="String">twohybrid</Data><NamedCell ss:Name="Print_Area"/></Cell>
    <Cell><Data ss:Type="Number">8052657</Data><NamedCell ss:Name="Print_Area"/></Cell>
   </Row>
   <Row>
    <Cell><Data ss:Type="String">YBL016W</Data><NamedCell ss:Name="Print_Area"/></Cell>
    <Cell><Data ss:Type="String">YDR103W</Data><NamedCell ss:Name="Print_Area"/></Cell>
    <Cell><Data ss:Type="String">copurification</Data><NamedCell
      ss:Name="Print_Area"/></Cell>
    <Cell><Data ss:Type="Number">8062390</Data><NamedCell ss:Name="Print_Area"/></Cell>
   </Row>
   <Row>
    <Cell><Data ss:Type="String">YBL016W</Data><NamedCell ss:Name="Print_Area"/></Cell>
    <Cell><Data ss:Type="String">YDR103W</Data><NamedCell ss:Name="Print_Area"/></Cell>
    <Cell><Data ss:Type="String">reconstitutedcomplex</Data><NamedCell
      ss:Name="Print_Area"/></Cell>
    <Cell><Data ss:Type="Number">15322134</Data><NamedCell ss:Name="Print_Area"/></Cell>
   </Row>
   <Row>
    <Cell><Data ss:Type="String">YBL016W</Data><NamedCell ss:Name="Print_Area"/></Cell>
    <Cell><Data ss:Type="String">YDR103W</Data><NamedCell ss:Name="Print_Area"/></Cell>
    <Cell><Data ss:Type="String">unknown</Data><NamedCell ss:Name="Print_Area"/></Cell>
    <Cell><Data ss:Type="Number">7851759</Data><NamedCell ss:Name="Print_Area"/></Cell>
   </Row>
   <Row>
    <Cell><Data ss:Type="String">YBL016W</Data><NamedCell ss:Name="Print_Area"/></Cell>
    <Cell><Data ss:Type="String">YDR103W</Data><NamedCell ss:Name="Print_Area"/></Cell>
    <Cell><Data ss:Type="String">affinitycapturewestern</Data><NamedCell
      ss:Name="Print_Area"/></Cell>
    <Cell><Data ss:Type="Number">12511654</Data><NamedCell ss:Name="Print_Area"/></Cell>
   </Row>
   <Row>
    <Cell><Data ss:Type="String">YBL016W</Data><NamedCell ss:Name="Print_Area"/></Cell>
    <Cell><Data ss:Type="String">YDR103W</Data><NamedCell ss:Name="Print_Area"/></Cell>
    <Cell><Data ss:Type="String">unknown</Data><NamedCell ss:Name="Print_Area"/></Cell>
    <Cell><Data ss:Type="Number">8314085</Data><NamedCell ss:Name="Print_Area"/></Cell>
   </Row>
   <Row>
    <Cell><Data ss:Type="String">YBL016W</Data><NamedCell ss:Name="Print_Area"/></Cell>
    <Cell><Data ss:Type="String">YDR103W</Data><NamedCell ss:Name="Print_Area"/></Cell>
    <Cell><Data ss:Type="String">reconstitutedcomplex</Data><NamedCell
      ss:Name="Print_Area"/></Cell>
    <Cell><Data ss:Type="Number">8314085</Data><NamedCell ss:Name="Print_Area"/></Cell>
   </Row>
   <Row>
    <Cell><Data ss:Type="String">YBL016W</Data><NamedCell ss:Name="Print_Area"/></Cell>
    <Cell><Data ss:Type="String">YDR103W</Data><NamedCell ss:Name="Print_Area"/></Cell>
    <Cell><Data ss:Type="String">affinitycapturewestern</Data><NamedCell
      ss:Name="Print_Area"/></Cell>
    <Cell><Data ss:Type="Number">11071925</Data><NamedCell ss:Name="Print_Area"/></Cell>
   </Row>
   <Row>
    <Cell><Data ss:Type="String">YBL016W</Data><NamedCell ss:Name="Print_Area"/></Cell>
    <Cell><Data ss:Type="String">YDR103W</Data><NamedCell ss:Name="Print_Area"/></Cell>
    <Cell><Data ss:Type="String">reconstitutedcomplex</Data><NamedCell
      ss:Name="Print_Area"/></Cell>
    <Cell><Data ss:Type="Number">14734536</Data><NamedCell ss:Name="Print_Area"/></Cell>
   </Row>
   <Row>
    <Cell><Data ss:Type="String">YBL016W</Data><NamedCell ss:Name="Print_Area"/></Cell>
    <Cell><Data ss:Type="String">YDR103W</Data><NamedCell ss:Name="Print_Area"/></Cell>
    <Cell><Data ss:Type="String">unknown</Data><NamedCell ss:Name="Print_Area"/></Cell>
    <Cell><Data ss:Type="Number">9335587</Data><NamedCell ss:Name="Print_Area"/></Cell>
   </Row>
   <Row>
    <Cell><Data ss:Type="String">YBL016W</Data><NamedCell ss:Name="Print_Area"/></Cell>
    <Cell><Data ss:Type="String">YDR103W</Data><NamedCell ss:Name="Print_Area"/></Cell>
    <Cell><Data ss:Type="String">twohybrid</Data><NamedCell ss:Name="Print_Area"/></Cell>
    <Cell><Data ss:Type="Number">8314085</Data><NamedCell ss:Name="Print_Area"/></Cell>
   </Row>
   <Row>
    <Cell><Data ss:Type="String">YBL016W</Data><NamedCell ss:Name="Print_Area"/></Cell>
    <Cell><Data ss:Type="String">YDR103W</Data><NamedCell ss:Name="Print_Area"/></Cell>
    <Cell><Data ss:Type="String">twohybrid</Data><NamedCell ss:Name="Print_Area"/></Cell>
    <Cell><Data ss:Type="Number">15020407</Data><NamedCell ss:Name="Print_Area"/></Cell>
   </Row>
   <Row>
    <Cell><Data ss:Type="String">YBL016W</Data><NamedCell ss:Name="Print_Area"/></Cell>
    <Cell><Data ss:Type="String">YDR103W</Data><NamedCell ss:Name="Print_Area"/></Cell>
    <Cell><Data ss:Type="String">affinitycapturewestern</Data><NamedCell
      ss:Name="Print_Area"/></Cell>
    <Cell><Data ss:Type="Number">10481914</Data><NamedCell ss:Name="Print_Area"/></Cell>
   </Row>
   <Row>
    <Cell><Data ss:Type="String">YBL016W</Data><NamedCell ss:Name="Print_Area"/></Cell>
    <Cell><Data ss:Type="String">YDR103W</Data><NamedCell ss:Name="Print_Area"/></Cell>
    <Cell><Data ss:Type="String">twohybrid</Data><NamedCell ss:Name="Print_Area"/></Cell>
    <Cell><Data ss:Type="Number">8062390</Data><NamedCell ss:Name="Print_Area"/></Cell>
   </Row>
   <Row>
    <Cell><Data ss:Type="String">YBL016W</Data><NamedCell ss:Name="Print_Area"/></Cell>
    <Cell><Data ss:Type="String">YDR103W</Data><NamedCell ss:Name="Print_Area"/></Cell>
    <Cell><Data ss:Type="String">twohybrid</Data><NamedCell ss:Name="Print_Area"/></Cell>
    <Cell><Data ss:Type="Number">10593609</Data><NamedCell ss:Name="Print_Area"/></Cell>
   </Row>
   <Row>
    <Cell><Data ss:Type="String">YBL016W</Data><NamedCell ss:Name="Print_Area"/></Cell>
    <Cell><Data ss:Type="String">YDR103W</Data><NamedCell ss:Name="Print_Area"/></Cell>
    <Cell><Data ss:Type="String">unknown</Data><NamedCell ss:Name="Print_Area"/></Cell>
    <Cell><Data ss:Type="Number">8062390</Data><NamedCell ss:Name="Print_Area"/></Cell>
   </Row>
   <Row>
    <Cell><Data ss:Type="String">YBL016W</Data><NamedCell ss:Name="Print_Area"/></Cell>
    <Cell><Data ss:Type="String">YDR103W</Data><NamedCell ss:Name="Print_Area"/></Cell>
    <Cell><Data ss:Type="String">affinitycapturewestern</Data><NamedCell
      ss:Name="Print_Area"/></Cell>
    <Cell><Data ss:Type="Number">8314085</Data><NamedCell ss:Name="Print_Area"/></Cell>
   </Row>
   <Row>
    <Cell><Data ss:Type="String">YBL016W</Data><NamedCell ss:Name="Print_Area"/></Cell>
    <Cell><Data ss:Type="String">YDR103W</Data><NamedCell ss:Name="Print_Area"/></Cell>
    <Cell><Data ss:Type="String">twohybrid</Data><NamedCell ss:Name="Print_Area"/></Cell>
    <Cell><Data ss:Type="Number">9311911</Data><NamedCell ss:Name="Print_Area"/></Cell>
   </Row>
   <Row>
    <Cell><Data ss:Type="String">YBL016W</Data><NamedCell ss:Name="Print_Area"/></Cell>
    <Cell><Data ss:Type="String">YDR103W</Data><NamedCell ss:Name="Print_Area"/></Cell>
    <Cell><Data ss:Type="String">affinitycapturewestern</Data><NamedCell
      ss:Name="Print_Area"/></Cell>
    <Cell><Data ss:Type="Number">9311911</Data><NamedCell ss:Name="Print_Area"/></Cell>
   </Row>
   <Row>
    <Cell><Data ss:Type="String">YBL016W</Data><NamedCell ss:Name="Print_Area"/></Cell>
    <Cell><Data ss:Type="String">YDR103W</Data><NamedCell ss:Name="Print_Area"/></Cell>
    <Cell><Data ss:Type="String">affinitycapturems</Data><NamedCell
      ss:Name="Print_Area"/></Cell>
    <Cell><Data ss:Type="Number">9501067</Data><NamedCell ss:Name="Print_Area"/></Cell>
   </Row>
   <Row>
    <Cell><Data ss:Type="String">YBL016W</Data><NamedCell ss:Name="Print_Area"/></Cell>
    <Cell><Data ss:Type="String">YDR103W</Data><NamedCell ss:Name="Print_Area"/></Cell>
    <Cell><Data ss:Type="String">biochemicalactivity</Data><NamedCell
      ss:Name="Print_Area"/></Cell>
    <Cell><Data ss:Type="Number">8314085</Data><NamedCell ss:Name="Print_Area"/></Cell>
   </Row>
   <Row>
    <Cell><Data ss:Type="String">YBL016W</Data><NamedCell ss:Name="Print_Area"/></Cell>
    <Cell><Data ss:Type="String">YDR103W</Data><NamedCell ss:Name="Print_Area"/></Cell>
    <Cell><Data ss:Type="String">reconstitutedcomplex</Data><NamedCell
      ss:Name="Print_Area"/></Cell>
    <Cell><Data ss:Type="Number">11525741</Data><NamedCell ss:Name="Print_Area"/></Cell>
   </Row>
   <Row>
    <Cell><Data ss:Type="String">YBL016W</Data><NamedCell ss:Name="Print_Area"/></Cell>
    <Cell><Data ss:Type="String">YDR103W</Data><NamedCell ss:Name="Print_Area"/></Cell>
    <Cell><Data ss:Type="String">biochemicalactivity</Data><NamedCell
      ss:Name="Print_Area"/></Cell>
    <Cell><Data ss:Type="Number">15322134</Data><NamedCell ss:Name="Print_Area"/></Cell>
   </Row>
   <Row>
    <Cell><Data ss:Type="String">YBL016W</Data><NamedCell ss:Name="Print_Area"/></Cell>
    <Cell><Data ss:Type="String">YDR103W</Data><NamedCell ss:Name="Print_Area"/></Cell>
    <Cell><Data ss:Type="String">affinitycapturewestern</Data><NamedCell
      ss:Name="Print_Area"/></Cell>
    <Cell><Data ss:Type="Number">9335587</Data><NamedCell ss:Name="Print_Area"/></Cell>
   </Row>
   <Row>
    <Cell><Data ss:Type="String">YBL016W</Data><NamedCell ss:Name="Print_Area"/></Cell>
    <Cell><Data ss:Type="String">YDR103W</Data><NamedCell ss:Name="Print_Area"/></Cell>
    <Cell><Data ss:Type="String">twohybrid</Data><NamedCell ss:Name="Print_Area"/></Cell>
    <Cell><Data ss:Type="Number">7851759</Data><NamedCell ss:Name="Print_Area"/></Cell>
   </Row>
   <Row>
    <Cell><Data ss:Type="String">YBL016W</Data><NamedCell ss:Name="Print_Area"/></Cell>
    <Cell><Data ss:Type="String">YDR388W</Data><NamedCell ss:Name="Print_Area"/></Cell>
    <Cell><Data ss:Type="String">biochemicalactivity</Data><NamedCell
      ss:Name="Print_Area"/></Cell>
    <Cell><Data ss:Type="Number">12857883</Data><NamedCell ss:Name="Print_Area"/></Cell>
   </Row>
   <Row>
    <Cell><Data ss:Type="String">YBL016W</Data><NamedCell ss:Name="Print_Area"/></Cell>
    <Cell><Data ss:Type="String">YDR388W</Data><NamedCell ss:Name="Print_Area"/></Cell>
    <Cell><Data ss:Type="String">reconstitutedcomplex</Data><NamedCell
      ss:Name="Print_Area"/></Cell>
    <Cell><Data ss:Type="Number">12857883</Data><NamedCell ss:Name="Print_Area"/></Cell>
   </Row>
   <Row>
    <Cell><Data ss:Type="String">YBL016W</Data><NamedCell ss:Name="Print_Area"/></Cell>
    <Cell><Data ss:Type="String">YDR480W</Data><NamedCell ss:Name="Print_Area"/></Cell>
    <Cell><Data ss:Type="String">unknown</Data><NamedCell ss:Name="Print_Area"/></Cell>
    <Cell><Data ss:Type="Number">9094309</Data><NamedCell ss:Name="Print_Area"/></Cell>
   </Row>
   <Row>
    <Cell><Data ss:Type="String">YBL016W</Data><NamedCell ss:Name="Print_Area"/></Cell>
    <Cell><Data ss:Type="String">YDR480W</Data><NamedCell ss:Name="Print_Area"/></Cell>
    <Cell><Data ss:Type="String">biochemicalactivity</Data><NamedCell
      ss:Name="Print_Area"/></Cell>
    <Cell><Data ss:Type="Number">9094309</Data><NamedCell ss:Name="Print_Area"/></Cell>
   </Row>
   <Row>
    <Cell><Data ss:Type="String">YBL016W</Data><NamedCell ss:Name="Print_Area"/></Cell>
    <Cell><Data ss:Type="String">YDR480W</Data><NamedCell ss:Name="Print_Area"/></Cell>
    <Cell><Data ss:Type="String">biochemicalactivity</Data><NamedCell
      ss:Name="Print_Area"/></Cell>
    <Cell><Data ss:Type="Number">11525741</Data><NamedCell ss:Name="Print_Area"/></Cell>
   </Row>
   <Row>
    <Cell><Data ss:Type="String">YBL016W</Data><NamedCell ss:Name="Print_Area"/></Cell>
    <Cell><Data ss:Type="String">YDR480W</Data><NamedCell ss:Name="Print_Area"/></Cell>
    <Cell><Data ss:Type="String">reconstitutedcomplex</Data><NamedCell
      ss:Name="Print_Area"/></Cell>
    <Cell><Data ss:Type="Number">9094309</Data><NamedCell ss:Name="Print_Area"/></Cell>
   </Row>
   <Row>
    <Cell><Data ss:Type="String">YBL016W</Data><NamedCell ss:Name="Print_Area"/></Cell>
    <Cell><Data ss:Type="String">YDR480W</Data><NamedCell ss:Name="Print_Area"/></Cell>
    <Cell><Data ss:Type="String">unknown</Data><NamedCell ss:Name="Print_Area"/></Cell>
    <Cell><Data ss:Type="Number">8918885</Data><NamedCell ss:Name="Print_Area"/></Cell>
   </Row>
   <Row>
    <Cell><Data ss:Type="String">YBL016W</Data><NamedCell ss:Name="Print_Area"/></Cell>
    <Cell><Data ss:Type="String">YDR480W</Data><NamedCell ss:Name="Print_Area"/></Cell>
    <Cell><Data ss:Type="String">affinitycapturewestern</Data><NamedCell
      ss:Name="Print_Area"/></Cell>
    <Cell><Data ss:Type="Number">9094309</Data><NamedCell ss:Name="Print_Area"/></Cell>
   </Row>
   <Row>
    <Cell><Data ss:Type="String">YBL016W</Data><NamedCell ss:Name="Print_Area"/></Cell>
    <Cell><Data ss:Type="String">YDR480W</Data><NamedCell ss:Name="Print_Area"/></Cell>
    <Cell><Data ss:Type="String">twohybrid</Data><NamedCell ss:Name="Print_Area"/></Cell>
    <Cell><Data ss:Type="Number">8918885</Data><NamedCell ss:Name="Print_Area"/></Cell>
   </Row>
   <Row>
    <Cell><Data ss:Type="String">YBL016W</Data><NamedCell ss:Name="Print_Area"/></Cell>
    <Cell><Data ss:Type="String">YDR480W</Data><NamedCell ss:Name="Print_Area"/></Cell>
    <Cell><Data ss:Type="String">reconstitutedcomplex</Data><NamedCell
      ss:Name="Print_Area"/></Cell>
    <Cell><Data ss:Type="Number">14734536</Data><NamedCell ss:Name="Print_Area"/></Cell>
   </Row>
   <Row>
    <Cell><Data ss:Type="String">YBL016W</Data><NamedCell ss:Name="Print_Area"/></Cell>
    <Cell><Data ss:Type="String">YDR480W</Data><NamedCell ss:Name="Print_Area"/></Cell>
    <Cell><Data ss:Type="String">twohybrid</Data><NamedCell ss:Name="Print_Area"/></Cell>
    <Cell><Data ss:Type="Number">9094309</Data><NamedCell ss:Name="Print_Area"/></Cell>
   </Row>
   <Row>
    <Cell><Data ss:Type="String">YBL016W</Data><NamedCell ss:Name="Print_Area"/></Cell>
    <Cell><Data ss:Type="String">YER075C</Data><NamedCell ss:Name="Print_Area"/></Cell>
    <Cell><Data ss:Type="String">reconstitutedcomplex</Data><NamedCell
      ss:Name="Print_Area"/></Cell>
    <Cell><Data ss:Type="Number">10557209</Data><NamedCell ss:Name="Print_Area"/></Cell>
   </Row>
   <Row>
    <Cell><Data ss:Type="String">YBL016W</Data><NamedCell ss:Name="Print_Area"/></Cell>
    <Cell><Data ss:Type="String">YER075C</Data><NamedCell ss:Name="Print_Area"/></Cell>
    <Cell><Data ss:Type="String">affinitycapturewestern</Data><NamedCell
      ss:Name="Print_Area"/></Cell>
    <Cell><Data ss:Type="Number">10557209</Data><NamedCell ss:Name="Print_Area"/></Cell>
   </Row>
   <Row>
    <Cell><Data ss:Type="String">YBL016W</Data><NamedCell ss:Name="Print_Area"/></Cell>
    <Cell><Data ss:Type="String">YER075C</Data><NamedCell ss:Name="Print_Area"/></Cell>
    <Cell><Data ss:Type="String">twohybrid</Data><NamedCell ss:Name="Print_Area"/></Cell>
    <Cell><Data ss:Type="Number">10557209</Data><NamedCell ss:Name="Print_Area"/></Cell>
   </Row>
   <Row>
    <Cell><Data ss:Type="String">YBL016W</Data><NamedCell ss:Name="Print_Area"/></Cell>
    <Cell><Data ss:Type="String">YER075C</Data><NamedCell ss:Name="Print_Area"/></Cell>
    <Cell><Data ss:Type="String">biochemicalactivity</Data><NamedCell
      ss:Name="Print_Area"/></Cell>
    <Cell><Data ss:Type="Number">10557209</Data><NamedCell ss:Name="Print_Area"/></Cell>
   </Row>
   <Row>
    <Cell><Data ss:Type="String">YBL016W</Data><NamedCell ss:Name="Print_Area"/></Cell>
    <Cell><Data ss:Type="String">YER075C</Data><NamedCell ss:Name="Print_Area"/></Cell>
    <Cell><Data ss:Type="String">copurification</Data><NamedCell
      ss:Name="Print_Area"/></Cell>
    <Cell><Data ss:Type="Number">10557209</Data><NamedCell ss:Name="Print_Area"/></Cell>
   </Row>
   <Row>
    <Cell><Data ss:Type="String">YBL016W</Data><NamedCell ss:Name="Print_Area"/></Cell>
    <Cell><Data ss:Type="String">YGL178W</Data><NamedCell ss:Name="Print_Area"/></Cell>
    <Cell><Data ss:Type="String">unknown</Data><NamedCell ss:Name="Print_Area"/></Cell>
    <Cell><Data ss:Type="Number">9154842</Data><NamedCell ss:Name="Print_Area"/></Cell>
   </Row>
   <Row>
    <Cell><Data ss:Type="String">YBL016W</Data><NamedCell ss:Name="Print_Area"/></Cell>
    <Cell><Data ss:Type="String">YGL178W</Data><NamedCell ss:Name="Print_Area"/></Cell>
    <Cell><Data ss:Type="String">twohybrid</Data><NamedCell ss:Name="Print_Area"/></Cell>
    <Cell><Data ss:Type="Number">9154842</Data><NamedCell ss:Name="Print_Area"/></Cell>
   </Row>
   <Row>
    <Cell><Data ss:Type="String">YBL016W</Data><NamedCell ss:Name="Print_Area"/></Cell>
    <Cell><Data ss:Type="String">YGL178W</Data><NamedCell ss:Name="Print_Area"/></Cell>
    <Cell><Data ss:Type="String">affinitycapturewestern</Data><NamedCell
      ss:Name="Print_Area"/></Cell>
    <Cell><Data ss:Type="Number">9154842</Data><NamedCell ss:Name="Print_Area"/></Cell>
   </Row>
   <Row>
    <Cell><Data ss:Type="String">YBL016W</Data><NamedCell ss:Name="Print_Area"/></Cell>
    <Cell><Data ss:Type="String">YHR005C</Data><NamedCell ss:Name="Print_Area"/></Cell>
    <Cell><Data ss:Type="String">reconstitutedcomplex</Data><NamedCell
      ss:Name="Print_Area"/></Cell>
    <Cell><Data ss:Type="Number">12029138</Data><NamedCell ss:Name="Print_Area"/></Cell>
   </Row>
   <Row>
    <Cell><Data ss:Type="String">YBL016W</Data><NamedCell ss:Name="Print_Area"/></Cell>
    <Cell><Data ss:Type="String">YHR005C</Data><NamedCell ss:Name="Print_Area"/></Cell>
    <Cell><Data ss:Type="String">affinitycapturewestern</Data><NamedCell
      ss:Name="Print_Area"/></Cell>
    <Cell><Data ss:Type="Number">12029138</Data><NamedCell ss:Name="Print_Area"/></Cell>
   </Row>
   <Row>
    <Cell><Data ss:Type="String">YBL016W</Data><NamedCell ss:Name="Print_Area"/></Cell>
    <Cell><Data ss:Type="String">YHR005C</Data><NamedCell ss:Name="Print_Area"/></Cell>
    <Cell><Data ss:Type="String">unknown</Data><NamedCell ss:Name="Print_Area"/></Cell>
    <Cell><Data ss:Type="Number">12029138</Data><NamedCell ss:Name="Print_Area"/></Cell>
   </Row>
   <Row>
    <Cell><Data ss:Type="String">YBL016W</Data><NamedCell ss:Name="Print_Area"/></Cell>
    <Cell><Data ss:Type="String">YHR084W</Data><NamedCell ss:Name="Print_Area"/></Cell>
    <Cell><Data ss:Type="String">biochemicalactivity</Data><NamedCell
      ss:Name="Print_Area"/></Cell>
    <Cell><Data ss:Type="Number">8334305</Data><NamedCell ss:Name="Print_Area"/></Cell>
   </Row>
   <Row>
    <Cell><Data ss:Type="String">YBL016W</Data><NamedCell ss:Name="Print_Area"/></Cell>
    <Cell><Data ss:Type="String">YHR084W</Data><NamedCell ss:Name="Print_Area"/></Cell>
    <Cell><Data ss:Type="String">unknown</Data><NamedCell ss:Name="Print_Area"/></Cell>
    <Cell><Data ss:Type="Number">8334305</Data><NamedCell ss:Name="Print_Area"/></Cell>
   </Row>
   <Row>
    <Cell><Data ss:Type="String">YBL016W</Data><NamedCell ss:Name="Print_Area"/></Cell>
    <Cell><Data ss:Type="String">YJL157C</Data><NamedCell ss:Name="Print_Area"/></Cell>
    <Cell><Data ss:Type="String">biochemicalactivity</Data><NamedCell
      ss:Name="Print_Area"/></Cell>
    <Cell><Data ss:Type="Number">8334305</Data><NamedCell ss:Name="Print_Area"/></Cell>
   </Row>
   <Row>
    <Cell><Data ss:Type="String">YBL016W</Data><NamedCell ss:Name="Print_Area"/></Cell>
    <Cell><Data ss:Type="String">YJL157C</Data><NamedCell ss:Name="Print_Area"/></Cell>
    <Cell><Data ss:Type="String">biochemicalactivity</Data><NamedCell
      ss:Name="Print_Area"/></Cell>
    <Cell><Data ss:Type="Number">8500168</Data><NamedCell ss:Name="Print_Area"/></Cell>
   </Row>
   <Row>
    <Cell><Data ss:Type="String">YBL016W</Data><NamedCell ss:Name="Print_Area"/></Cell>
    <Cell><Data ss:Type="String">YJL157C</Data><NamedCell ss:Name="Print_Area"/></Cell>
    <Cell><Data ss:Type="String">biochemicalactivity</Data><NamedCell
      ss:Name="Print_Area"/></Cell>
    <Cell><Data ss:Type="Number">11525741</Data><NamedCell ss:Name="Print_Area"/></Cell>
   </Row>
   <Row>
    <Cell><Data ss:Type="String">YBL016W</Data><NamedCell ss:Name="Print_Area"/></Cell>
    <Cell><Data ss:Type="String">YJL157C</Data><NamedCell ss:Name="Print_Area"/></Cell>
    <Cell><Data ss:Type="String">unknown</Data><NamedCell ss:Name="Print_Area"/></Cell>
    <Cell><Data ss:Type="Number">8334305</Data><NamedCell ss:Name="Print_Area"/></Cell>
   </Row>
   <Row>
    <Cell><Data ss:Type="String">YBL016W</Data><NamedCell ss:Name="Print_Area"/></Cell>
    <Cell><Data ss:Type="String">YJL157C</Data><NamedCell ss:Name="Print_Area"/></Cell>
    <Cell><Data ss:Type="String">twohybrid</Data><NamedCell ss:Name="Print_Area"/></Cell>
    <Cell><Data ss:Type="Number">8334305</Data><NamedCell ss:Name="Print_Area"/></Cell>
   </Row>
   <Row>
    <Cell><Data ss:Type="String">YBL016W</Data><NamedCell ss:Name="Print_Area"/></Cell>
    <Cell><Data ss:Type="String">YLR310C</Data><NamedCell ss:Name="Print_Area"/></Cell>
    <Cell><Data ss:Type="String">reconstitutedcomplex</Data><NamedCell
      ss:Name="Print_Area"/></Cell>
    <Cell><Data ss:Type="Number">12867033</Data><NamedCell ss:Name="Print_Area"/></Cell>
   </Row>
   <Row>
    <Cell><Data ss:Type="String">YBL016W</Data><NamedCell ss:Name="Print_Area"/></Cell>
    <Cell><Data ss:Type="String">YLR310C</Data><NamedCell ss:Name="Print_Area"/></Cell>
    <Cell><Data ss:Type="String">affinitycapturewestern</Data><NamedCell
      ss:Name="Print_Area"/></Cell>
    <Cell><Data ss:Type="Number">12867033</Data><NamedCell ss:Name="Print_Area"/></Cell>
   </Row>
   <Row>
    <Cell><Data ss:Type="String">YBL016W</Data><NamedCell ss:Name="Print_Area"/></Cell>
    <Cell><Data ss:Type="String">YLR310C</Data><NamedCell ss:Name="Print_Area"/></Cell>
    <Cell><Data ss:Type="String">biochemicalactivity</Data><NamedCell
      ss:Name="Print_Area"/></Cell>
    <Cell><Data ss:Type="Number">12867033</Data><NamedCell ss:Name="Print_Area"/></Cell>
   </Row>
   <Row>
    <Cell><Data ss:Type="String">YBL016W</Data><NamedCell ss:Name="Print_Area"/></Cell>
    <Cell><Data ss:Type="String">YLR362W</Data><NamedCell ss:Name="Print_Area"/></Cell>
    <Cell><Data ss:Type="String">cofractionation</Data><NamedCell
      ss:Name="Print_Area"/></Cell>
    <Cell><Data ss:Type="Number">8062390</Data><NamedCell ss:Name="Print_Area"/></Cell>
   </Row>
   <Row>
    <Cell><Data ss:Type="String">YBL016W</Data><NamedCell ss:Name="Print_Area"/></Cell>
    <Cell><Data ss:Type="String">YLR362W</Data><NamedCell ss:Name="Print_Area"/></Cell>
    <Cell><Data ss:Type="String">affinitycapturewestern</Data><NamedCell
      ss:Name="Print_Area"/></Cell>
    <Cell><Data ss:Type="Number">15713635</Data><NamedCell ss:Name="Print_Area"/></Cell>
   </Row>
   <Row>
    <Cell><Data ss:Type="String">YBL016W</Data><NamedCell ss:Name="Print_Area"/></Cell>
    <Cell><Data ss:Type="String">YLR362W</Data><NamedCell ss:Name="Print_Area"/></Cell>
    <Cell><Data ss:Type="String">twohybrid</Data><NamedCell ss:Name="Print_Area"/></Cell>
    <Cell><Data ss:Type="Number">7851759</Data><NamedCell ss:Name="Print_Area"/></Cell>
   </Row>
   <Row>
    <Cell><Data ss:Type="String">YBL016W</Data><NamedCell ss:Name="Print_Area"/></Cell>
    <Cell><Data ss:Type="String">YLR362W</Data><NamedCell ss:Name="Print_Area"/></Cell>
    <Cell><Data ss:Type="String">reconstitutedcomplex</Data><NamedCell
      ss:Name="Print_Area"/></Cell>
    <Cell><Data ss:Type="Number">11525741</Data><NamedCell ss:Name="Print_Area"/></Cell>
   </Row>
   <Row>
    <Cell><Data ss:Type="String">YBL016W</Data><NamedCell ss:Name="Print_Area"/></Cell>
    <Cell><Data ss:Type="String">YLR362W</Data><NamedCell ss:Name="Print_Area"/></Cell>
    <Cell><Data ss:Type="String">twohybrid</Data><NamedCell ss:Name="Print_Area"/></Cell>
    <Cell><Data ss:Type="Number">15020407</Data><NamedCell ss:Name="Print_Area"/></Cell>
   </Row>
   <Row>
    <Cell><Data ss:Type="String">YBL016W</Data><NamedCell ss:Name="Print_Area"/></Cell>
    <Cell><Data ss:Type="String">YLR362W</Data><NamedCell ss:Name="Print_Area"/></Cell>
    <Cell><Data ss:Type="String">unknown</Data><NamedCell ss:Name="Print_Area"/></Cell>
    <Cell><Data ss:Type="Number">7851759</Data><NamedCell ss:Name="Print_Area"/></Cell>
   </Row>
   <Row>
    <Cell><Data ss:Type="String">YBL016W</Data><NamedCell ss:Name="Print_Area"/></Cell>
    <Cell><Data ss:Type="String">YNL053W</Data><NamedCell ss:Name="Print_Area"/></Cell>
    <Cell><Data ss:Type="String">colocalization</Data><NamedCell
      ss:Name="Print_Area"/></Cell>
    <Cell><Data ss:Type="Number">12556475</Data><NamedCell ss:Name="Print_Area"/></Cell>
   </Row>
   <Row>
    <Cell><Data ss:Type="String">YBL016W</Data><NamedCell ss:Name="Print_Area"/></Cell>
    <Cell><Data ss:Type="String">YNL053W</Data><NamedCell ss:Name="Print_Area"/></Cell>
    <Cell><Data ss:Type="String">biochemicalactivity</Data><NamedCell
      ss:Name="Print_Area"/></Cell>
    <Cell><Data ss:Type="Number">8306972</Data><NamedCell ss:Name="Print_Area"/></Cell>
   </Row>
   <Row>
    <Cell><Data ss:Type="String">YBL016W</Data><NamedCell ss:Name="Print_Area"/></Cell>
    <Cell><Data ss:Type="String">YPL049C</Data><NamedCell ss:Name="Print_Area"/></Cell>
    <Cell><Data ss:Type="String">twohybrid</Data><NamedCell ss:Name="Print_Area"/></Cell>
    <Cell><Data ss:Type="Number">9094309</Data><NamedCell ss:Name="Print_Area"/></Cell>
   </Row>
   <Row>
    <Cell><Data ss:Type="String">YBL016W</Data><NamedCell ss:Name="Print_Area"/></Cell>
    <Cell><Data ss:Type="String">YPL049C</Data><NamedCell ss:Name="Print_Area"/></Cell>
    <Cell><Data ss:Type="String">biochemicalactivity</Data><NamedCell
      ss:Name="Print_Area"/></Cell>
    <Cell><Data ss:Type="Number">11525741</Data><NamedCell ss:Name="Print_Area"/></Cell>
   </Row>
   <Row>
    <Cell><Data ss:Type="String">YBL016W</Data><NamedCell ss:Name="Print_Area"/></Cell>
    <Cell><Data ss:Type="String">YPL049C</Data><NamedCell ss:Name="Print_Area"/></Cell>
    <Cell><Data ss:Type="String">twohybrid</Data><NamedCell ss:Name="Print_Area"/></Cell>
    <Cell><Data ss:Type="Number">8918885</Data><NamedCell ss:Name="Print_Area"/></Cell>
   </Row>
   <Row>
    <Cell><Data ss:Type="String">YBL016W</Data><NamedCell ss:Name="Print_Area"/></Cell>
    <Cell><Data ss:Type="String">YPL049C</Data><NamedCell ss:Name="Print_Area"/></Cell>
    <Cell><Data ss:Type="String">unknown</Data><NamedCell ss:Name="Print_Area"/></Cell>
    <Cell><Data ss:Type="Number">9094309</Data><NamedCell ss:Name="Print_Area"/></Cell>
   </Row>
   <Row>
    <Cell><Data ss:Type="String">YBL016W</Data><NamedCell ss:Name="Print_Area"/></Cell>
    <Cell><Data ss:Type="String">YPL049C</Data><NamedCell ss:Name="Print_Area"/></Cell>
    <Cell><Data ss:Type="String">unknown</Data><NamedCell ss:Name="Print_Area"/></Cell>
    <Cell><Data ss:Type="Number">8918885</Data><NamedCell ss:Name="Print_Area"/></Cell>
   </Row>
   <Row>
    <Cell><Data ss:Type="String">YBL016W</Data><NamedCell ss:Name="Print_Area"/></Cell>
    <Cell><Data ss:Type="String">YPL049C</Data><NamedCell ss:Name="Print_Area"/></Cell>
    <Cell><Data ss:Type="String">biochemicalactivity</Data><NamedCell
      ss:Name="Print_Area"/></Cell>
    <Cell><Data ss:Type="Number">9094309</Data><NamedCell ss:Name="Print_Area"/></Cell>
   </Row>
   <Row>
    <Cell><Data ss:Type="String">YBL016W</Data><NamedCell ss:Name="Print_Area"/></Cell>
    <Cell><Data ss:Type="String">YPL049C</Data><NamedCell ss:Name="Print_Area"/></Cell>
    <Cell><Data ss:Type="String">reconstitutedcomplex</Data><NamedCell
      ss:Name="Print_Area"/></Cell>
    <Cell><Data ss:Type="Number">9094309</Data><NamedCell ss:Name="Print_Area"/></Cell>
   </Row>
   <Row>
    <Cell><Data ss:Type="String">YBL016W</Data><NamedCell ss:Name="Print_Area"/></Cell>
    <Cell><Data ss:Type="String">YPL049C</Data><NamedCell ss:Name="Print_Area"/></Cell>
    <Cell><Data ss:Type="String">affinitycapturewestern</Data><NamedCell
      ss:Name="Print_Area"/></Cell>
    <Cell><Data ss:Type="Number">9094309</Data><NamedCell ss:Name="Print_Area"/></Cell>
   </Row>
   <Row>
    <Cell><Data ss:Type="String">YBL016W</Data><NamedCell ss:Name="Print_Area"/></Cell>
    <Cell><Data ss:Type="String">YPL049C</Data><NamedCell ss:Name="Print_Area"/></Cell>
    <Cell><Data ss:Type="String">reconstitutedcomplex</Data><NamedCell
      ss:Name="Print_Area"/></Cell>
    <Cell><Data ss:Type="Number">14734536</Data><NamedCell ss:Name="Print_Area"/></Cell>
   </Row>
   <Row>
    <Cell><Data ss:Type="String">YBL017C</Data><NamedCell ss:Name="Print_Area"/></Cell>
    <Cell><Data ss:Type="String">YJL029C</Data><NamedCell ss:Name="Print_Area"/></Cell>
    <Cell><Data ss:Type="String">affinitycapturewestern</Data><NamedCell
      ss:Name="Print_Area"/></Cell>
    <Cell><Data ss:Type="Number">10637310</Data><NamedCell ss:Name="Print_Area"/></Cell>
   </Row>
   <Row>
    <Cell><Data ss:Type="String">YBL017C</Data><NamedCell ss:Name="Print_Area"/></Cell>
    <Cell><Data ss:Type="String">YJL029C</Data><NamedCell ss:Name="Print_Area"/></Cell>
    <Cell><Data ss:Type="String">cofractionation</Data><NamedCell
      ss:Name="Print_Area"/></Cell>
    <Cell><Data ss:Type="Number">10637310</Data><NamedCell ss:Name="Print_Area"/></Cell>
   </Row>
   <Row>
    <Cell><Data ss:Type="String">YBL018C</Data><NamedCell ss:Name="Print_Area"/></Cell>
    <Cell><Data ss:Type="String">YHR041C</Data><NamedCell ss:Name="Print_Area"/></Cell>
    <Cell><Data ss:Type="String">twohybrid</Data><NamedCell ss:Name="Print_Area"/></Cell>
    <Cell><Data ss:Type="Number">10655498</Data><NamedCell ss:Name="Print_Area"/></Cell>
   </Row>
   <Row>
    <Cell><Data ss:Type="String">YBL018C</Data><NamedCell ss:Name="Print_Area"/></Cell>
    <Cell><Data ss:Type="String">YHR041C</Data><NamedCell ss:Name="Print_Area"/></Cell>
    <Cell><Data ss:Type="String">twohybrid</Data><NamedCell ss:Name="Print_Area"/></Cell>
    <Cell><Data ss:Type="Number">11283351</Data><NamedCell ss:Name="Print_Area"/></Cell>
   </Row>
   <Row>
    <Cell><Data ss:Type="String">YBL019W</Data><NamedCell ss:Name="Print_Area"/></Cell>
    <Cell><Data ss:Type="String">YBR088C</Data><NamedCell ss:Name="Print_Area"/></Cell>
    <Cell><Data ss:Type="String">copurification</Data><NamedCell
      ss:Name="Print_Area"/></Cell>
    <Cell><Data ss:Type="Number">12192046</Data><NamedCell ss:Name="Print_Area"/></Cell>
   </Row>
   <Row>
    <Cell><Data ss:Type="String">YBL019W</Data><NamedCell ss:Name="Print_Area"/></Cell>
    <Cell><Data ss:Type="String">YBR088C</Data><NamedCell ss:Name="Print_Area"/></Cell>
    <Cell><Data ss:Type="String">twohybrid</Data><NamedCell ss:Name="Print_Area"/></Cell>
    <Cell><Data ss:Type="Number">12192046</Data><NamedCell ss:Name="Print_Area"/></Cell>
   </Row>
   <Row>
    <Cell><Data ss:Type="String">YBL021C</Data><NamedCell ss:Name="Print_Area"/></Cell>
    <Cell><Data ss:Type="String">YGL237C</Data><NamedCell ss:Name="Print_Area"/></Cell>
    <Cell><Data ss:Type="String">reconstitutedcomplex</Data><NamedCell
      ss:Name="Print_Area"/></Cell>
    <Cell><Data ss:Type="Number">10972830</Data><NamedCell ss:Name="Print_Area"/></Cell>
   </Row>
   <Row>
    <Cell><Data ss:Type="String">YBL021C</Data><NamedCell ss:Name="Print_Area"/></Cell>
    <Cell><Data ss:Type="String">YGL237C</Data><NamedCell ss:Name="Print_Area"/></Cell>
    <Cell><Data ss:Type="String">unknown</Data><NamedCell ss:Name="Print_Area"/></Cell>
    <Cell><Data ss:Type="Number">7828851</Data><NamedCell ss:Name="Print_Area"/></Cell>
   </Row>
   <Row>
    <Cell><Data ss:Type="String">YBL021C</Data><NamedCell ss:Name="Print_Area"/></Cell>
    <Cell><Data ss:Type="String">YGL237C</Data><NamedCell ss:Name="Print_Area"/></Cell>
    <Cell><Data ss:Type="String">twohybrid</Data><NamedCell ss:Name="Print_Area"/></Cell>
    <Cell><Data ss:Type="Number">11283351</Data><NamedCell ss:Name="Print_Area"/></Cell>
   </Row>
   <Row>
    <Cell><Data ss:Type="String">YBL021C</Data><NamedCell ss:Name="Print_Area"/></Cell>
    <Cell><Data ss:Type="String">YGL237C</Data><NamedCell ss:Name="Print_Area"/></Cell>
    <Cell><Data ss:Type="String">unknown</Data><NamedCell ss:Name="Print_Area"/></Cell>
    <Cell><Data ss:Type="Number">9372932</Data><NamedCell ss:Name="Print_Area"/></Cell>
   </Row>
   <Row>
    <Cell><Data ss:Type="String">YBL021C</Data><NamedCell ss:Name="Print_Area"/></Cell>
    <Cell><Data ss:Type="String">YGL237C</Data><NamedCell ss:Name="Print_Area"/></Cell>
    <Cell><Data ss:Type="String">affinitycapturems</Data><NamedCell
      ss:Name="Print_Area"/></Cell>
    <Cell><Data ss:Type="Number">16554755</Data><NamedCell ss:Name="Print_Area"/></Cell>
   </Row>
   <Row>
    <Cell><Data ss:Type="String">YBL021C</Data><NamedCell ss:Name="Print_Area"/></Cell>
    <Cell><Data ss:Type="String">YHR187W</Data><NamedCell ss:Name="Print_Area"/></Cell>
    <Cell><Data ss:Type="String">affinitycapturems</Data><NamedCell
      ss:Name="Print_Area"/></Cell>
    <Cell><Data ss:Type="Number">16429126</Data><NamedCell ss:Name="Print_Area"/></Cell>
   </Row>
   <Row>
    <Cell><Data ss:Type="String">YBL021C</Data><NamedCell ss:Name="Print_Area"/></Cell>
    <Cell><Data ss:Type="String">YHR187W</Data><NamedCell ss:Name="Print_Area"/></Cell>
    <Cell><Data ss:Type="String">copurification</Data><NamedCell
      ss:Name="Print_Area"/></Cell>
    <Cell><Data ss:Type="Number">2832951</Data><NamedCell ss:Name="Print_Area"/></Cell>
   </Row>
   <Row>
    <Cell><Data ss:Type="String">YBL021C</Data><NamedCell ss:Name="Print_Area"/></Cell>
    <Cell><Data ss:Type="String">YHR187W</Data><NamedCell ss:Name="Print_Area"/></Cell>
    <Cell><Data ss:Type="String">reconstitutedcomplex</Data><NamedCell
      ss:Name="Print_Area"/></Cell>
    <Cell><Data ss:Type="Number">7828851</Data><NamedCell ss:Name="Print_Area"/></Cell>
   </Row>
   <Row>
    <Cell><Data ss:Type="String">YBL021C</Data><NamedCell ss:Name="Print_Area"/></Cell>
    <Cell><Data ss:Type="String">YKL109W</Data><NamedCell ss:Name="Print_Area"/></Cell>
    <Cell><Data ss:Type="String">unknown</Data><NamedCell ss:Name="Print_Area"/></Cell>
    <Cell><Data ss:Type="Number">7828851</Data><NamedCell ss:Name="Print_Area"/></Cell>
   </Row>
   <Row>
    <Cell><Data ss:Type="String">YBL021C</Data><NamedCell ss:Name="Print_Area"/></Cell>
    <Cell><Data ss:Type="String">YKL109W</Data><NamedCell ss:Name="Print_Area"/></Cell>
    <Cell><Data ss:Type="String">reconstitutedcomplex</Data><NamedCell
      ss:Name="Print_Area"/></Cell>
    <Cell><Data ss:Type="Number">9372932</Data><NamedCell ss:Name="Print_Area"/></Cell>
   </Row>
   <Row>
    <Cell><Data ss:Type="String">YBL021C</Data><NamedCell ss:Name="Print_Area"/></Cell>
    <Cell><Data ss:Type="String">YKL109W</Data><NamedCell ss:Name="Print_Area"/></Cell>
    <Cell><Data ss:Type="String">unknown</Data><NamedCell ss:Name="Print_Area"/></Cell>
    <Cell><Data ss:Type="Number">9372932</Data><NamedCell ss:Name="Print_Area"/></Cell>
   </Row>
   <Row>
    <Cell><Data ss:Type="String">YBL021C</Data><NamedCell ss:Name="Print_Area"/></Cell>
    <Cell><Data ss:Type="String">YOR358W</Data><NamedCell ss:Name="Print_Area"/></Cell>
    <Cell><Data ss:Type="String">affinitycapturems</Data><NamedCell
      ss:Name="Print_Area"/></Cell>
    <Cell><Data ss:Type="Number">16554755</Data><NamedCell ss:Name="Print_Area"/></Cell>
   </Row>
   <Row>
    <Cell><Data ss:Type="String">YBL021C</Data><NamedCell ss:Name="Print_Area"/></Cell>
    <Cell><Data ss:Type="String">YOR358W</Data><NamedCell ss:Name="Print_Area"/></Cell>
    <Cell><Data ss:Type="String">twohybrid</Data><NamedCell ss:Name="Print_Area"/></Cell>
    <Cell><Data ss:Type="Number">11283351</Data><NamedCell ss:Name="Print_Area"/></Cell>
   </Row>
   <Row>
    <Cell><Data ss:Type="String">YBL021C</Data><NamedCell ss:Name="Print_Area"/></Cell>
    <Cell><Data ss:Type="String">YOR358W</Data><NamedCell ss:Name="Print_Area"/></Cell>
    <Cell><Data ss:Type="String">reconstitutedcomplex</Data><NamedCell
      ss:Name="Print_Area"/></Cell>
    <Cell><Data ss:Type="Number">7828851</Data><NamedCell ss:Name="Print_Area"/></Cell>
   </Row>
   <Row>
    <Cell><Data ss:Type="String">YBL021C</Data><NamedCell ss:Name="Print_Area"/></Cell>
    <Cell><Data ss:Type="String">YOR358W</Data><NamedCell ss:Name="Print_Area"/></Cell>
    <Cell><Data ss:Type="String">unknown</Data><NamedCell ss:Name="Print_Area"/></Cell>
    <Cell><Data ss:Type="Number">7828851</Data><NamedCell ss:Name="Print_Area"/></Cell>
   </Row>
   <Row>
    <Cell><Data ss:Type="String">YBL021C</Data><NamedCell ss:Name="Print_Area"/></Cell>
    <Cell><Data ss:Type="String">YOR358W</Data><NamedCell ss:Name="Print_Area"/></Cell>
    <Cell><Data ss:Type="String">reconstitutedcomplex</Data><NamedCell
      ss:Name="Print_Area"/></Cell>
    <Cell><Data ss:Type="Number">10972830</Data><NamedCell ss:Name="Print_Area"/></Cell>
   </Row>
   <Row>
    <Cell><Data ss:Type="String">YBL021C</Data><NamedCell ss:Name="Print_Area"/></Cell>
    <Cell><Data ss:Type="String">YOR358W</Data><NamedCell ss:Name="Print_Area"/></Cell>
    <Cell><Data ss:Type="String">unknown</Data><NamedCell ss:Name="Print_Area"/></Cell>
    <Cell><Data ss:Type="Number">9372932</Data><NamedCell ss:Name="Print_Area"/></Cell>
   </Row>
   <Row>
    <Cell><Data ss:Type="String">YBL021C</Data><NamedCell ss:Name="Print_Area"/></Cell>
    <Cell><Data ss:Type="String">YOR358W</Data><NamedCell ss:Name="Print_Area"/></Cell>
    <Cell><Data ss:Type="String">twohybrid</Data><NamedCell ss:Name="Print_Area"/></Cell>
    <Cell><Data ss:Type="Number">7828851</Data><NamedCell ss:Name="Print_Area"/></Cell>
   </Row>
   <Row>
    <Cell><Data ss:Type="String">YBL023C</Data><NamedCell ss:Name="Print_Area"/></Cell>
    <Cell><Data ss:Type="String">YBR202W</Data><NamedCell ss:Name="Print_Area"/></Cell>
    <Cell><Data ss:Type="String">colocalization</Data><NamedCell
      ss:Name="Print_Area"/></Cell>
    <Cell><Data ss:Type="Number">16093348</Data><NamedCell ss:Name="Print_Area"/></Cell>
   </Row>
   <Row>
    <Cell><Data ss:Type="String">YBL023C</Data><NamedCell ss:Name="Print_Area"/></Cell>
    <Cell><Data ss:Type="String">YBR202W</Data><NamedCell ss:Name="Print_Area"/></Cell>
    <Cell><Data ss:Type="String">copurification</Data><NamedCell
      ss:Name="Print_Area"/></Cell>
    <Cell><Data ss:Type="Number">10567526</Data><NamedCell ss:Name="Print_Area"/></Cell>
   </Row>
   <Row>
    <Cell><Data ss:Type="String">YBL023C</Data><NamedCell ss:Name="Print_Area"/></Cell>
    <Cell><Data ss:Type="String">YBR202W</Data><NamedCell ss:Name="Print_Area"/></Cell>
    <Cell><Data ss:Type="String">cofractionation</Data><NamedCell
      ss:Name="Print_Area"/></Cell>
    <Cell><Data ss:Type="Number">12480933</Data><NamedCell ss:Name="Print_Area"/></Cell>
   </Row>
   <Row>
    <Cell><Data ss:Type="String">YBL023C</Data><NamedCell ss:Name="Print_Area"/></Cell>
    <Cell><Data ss:Type="String">YDL017W</Data><NamedCell ss:Name="Print_Area"/></Cell>
    <Cell><Data ss:Type="String">twohybrid</Data><NamedCell ss:Name="Print_Area"/></Cell>
    <Cell><Data ss:Type="Number">9407029</Data><NamedCell ss:Name="Print_Area"/></Cell>
   </Row>
   <Row>
    <Cell><Data ss:Type="String">YBL023C</Data><NamedCell ss:Name="Print_Area"/></Cell>
    <Cell><Data ss:Type="String">YDL017W</Data><NamedCell ss:Name="Print_Area"/></Cell>
    <Cell><Data ss:Type="String">unknown</Data><NamedCell ss:Name="Print_Area"/></Cell>
    <Cell><Data ss:Type="Number">9407029</Data><NamedCell ss:Name="Print_Area"/></Cell>
   </Row>
   <Row>
    <Cell><Data ss:Type="String">YBL023C</Data><NamedCell ss:Name="Print_Area"/></Cell>
    <Cell><Data ss:Type="String">YDL017W</Data><NamedCell ss:Name="Print_Area"/></Cell>
    <Cell><Data ss:Type="String">biochemicalactivity</Data><NamedCell
      ss:Name="Print_Area"/></Cell>
    <Cell><Data ss:Type="Number">10964916</Data><NamedCell ss:Name="Print_Area"/></Cell>
   </Row>
   <Row>
    <Cell><Data ss:Type="String">YBL023C</Data><NamedCell ss:Name="Print_Area"/></Cell>
    <Cell><Data ss:Type="String">YDL017W</Data><NamedCell ss:Name="Print_Area"/></Cell>
    <Cell><Data ss:Type="String">biochemicalactivity</Data><NamedCell
      ss:Name="Print_Area"/></Cell>
    <Cell><Data ss:Type="Number">10508166</Data><NamedCell ss:Name="Print_Area"/></Cell>
   </Row>
   <Row>
    <Cell><Data ss:Type="String">YBL023C</Data><NamedCell ss:Name="Print_Area"/></Cell>
    <Cell><Data ss:Type="String">YDL017W</Data><NamedCell ss:Name="Print_Area"/></Cell>
    <Cell><Data ss:Type="String">reconstitutedcomplex</Data><NamedCell
      ss:Name="Print_Area"/></Cell>
    <Cell><Data ss:Type="Number">10964916</Data><NamedCell ss:Name="Print_Area"/></Cell>
   </Row>
   <Row>
    <Cell><Data ss:Type="String">YBL023C</Data><NamedCell ss:Name="Print_Area"/></Cell>
    <Cell><Data ss:Type="String">YDL017W</Data><NamedCell ss:Name="Print_Area"/></Cell>
    <Cell><Data ss:Type="String">biochemicalactivity</Data><NamedCell
      ss:Name="Print_Area"/></Cell>
    <Cell><Data ss:Type="Number">9407029</Data><NamedCell ss:Name="Print_Area"/></Cell>
   </Row>
   <Row>
    <Cell><Data ss:Type="String">YBL023C</Data><NamedCell ss:Name="Print_Area"/></Cell>
    <Cell><Data ss:Type="String">YDL017W</Data><NamedCell ss:Name="Print_Area"/></Cell>
    <Cell><Data ss:Type="String">affinitycapturewestern</Data><NamedCell
      ss:Name="Print_Area"/></Cell>
    <Cell><Data ss:Type="Number">9407029</Data><NamedCell ss:Name="Print_Area"/></Cell>
   </Row>
   <Row>
    <Cell><Data ss:Type="String">YBL023C</Data><NamedCell ss:Name="Print_Area"/></Cell>
    <Cell><Data ss:Type="String">YDL017W</Data><NamedCell ss:Name="Print_Area"/></Cell>
    <Cell><Data ss:Type="String">biochemicalactivity</Data><NamedCell
      ss:Name="Print_Area"/></Cell>
    <Cell><Data ss:Type="Number">10373538</Data><NamedCell ss:Name="Print_Area"/></Cell>
   </Row>
   <Row>
    <Cell><Data ss:Type="String">YBL023C</Data><NamedCell ss:Name="Print_Area"/></Cell>
    <Cell><Data ss:Type="String">YDL017W</Data><NamedCell ss:Name="Print_Area"/></Cell>
    <Cell><Data ss:Type="String">reconstitutedcomplex</Data><NamedCell
      ss:Name="Print_Area"/></Cell>
    <Cell><Data ss:Type="Number">9407029</Data><NamedCell ss:Name="Print_Area"/></Cell>
   </Row>
   <Row>
    <Cell><Data ss:Type="String">YBL023C</Data><NamedCell ss:Name="Print_Area"/></Cell>
    <Cell><Data ss:Type="String">YDR052C</Data><NamedCell ss:Name="Print_Area"/></Cell>
    <Cell><Data ss:Type="String">affinitycapturewestern</Data><NamedCell
      ss:Name="Print_Area"/></Cell>
    <Cell><Data ss:Type="Number">9407029</Data><NamedCell ss:Name="Print_Area"/></Cell>
   </Row>
   <Row>
    <Cell><Data ss:Type="String">YBL023C</Data><NamedCell ss:Name="Print_Area"/></Cell>
    <Cell><Data ss:Type="String">YDR052C</Data><NamedCell ss:Name="Print_Area"/></Cell>
    <Cell><Data ss:Type="String">unknown</Data><NamedCell ss:Name="Print_Area"/></Cell>
    <Cell><Data ss:Type="Number">9407029</Data><NamedCell ss:Name="Print_Area"/></Cell>
   </Row>
   <Row>
    <Cell><Data ss:Type="String">YBL023C</Data><NamedCell ss:Name="Print_Area"/></Cell>
    <Cell><Data ss:Type="String">YDR052C</Data><NamedCell ss:Name="Print_Area"/></Cell>
    <Cell><Data ss:Type="String">twohybrid</Data><NamedCell ss:Name="Print_Area"/></Cell>
    <Cell><Data ss:Type="Number">9407029</Data><NamedCell ss:Name="Print_Area"/></Cell>
   </Row>
   <Row>
    <Cell><Data ss:Type="String">YBL023C</Data><NamedCell ss:Name="Print_Area"/></Cell>
    <Cell><Data ss:Type="String">YEL032W</Data><NamedCell ss:Name="Print_Area"/></Cell>
    <Cell><Data ss:Type="String">colocalization</Data><NamedCell
      ss:Name="Print_Area"/></Cell>
    <Cell><Data ss:Type="Number">16093348</Data><NamedCell ss:Name="Print_Area"/></Cell>
   </Row>
   <Row>
    <Cell><Data ss:Type="String">YBL023C</Data><NamedCell ss:Name="Print_Area"/></Cell>
    <Cell><Data ss:Type="String">YEL032W</Data><NamedCell ss:Name="Print_Area"/></Cell>
    <Cell><Data ss:Type="String">cofractionation</Data><NamedCell
      ss:Name="Print_Area"/></Cell>
    <Cell><Data ss:Type="Number">12480933</Data><NamedCell ss:Name="Print_Area"/></Cell>
   </Row>
   <Row>
    <Cell><Data ss:Type="String">YBL023C</Data><NamedCell ss:Name="Print_Area"/></Cell>
    <Cell><Data ss:Type="String">YEL032W</Data><NamedCell ss:Name="Print_Area"/></Cell>
    <Cell><Data ss:Type="String">reconstitutedcomplex</Data><NamedCell
      ss:Name="Print_Area"/></Cell>
    <Cell><Data ss:Type="Number">8756666</Data><NamedCell ss:Name="Print_Area"/></Cell>
   </Row>
   <Row>
    <Cell><Data ss:Type="String">YBL023C</Data><NamedCell ss:Name="Print_Area"/></Cell>
    <Cell><Data ss:Type="String">YEL032W</Data><NamedCell ss:Name="Print_Area"/></Cell>
    <Cell><Data ss:Type="String">twohybrid</Data><NamedCell ss:Name="Print_Area"/></Cell>
    <Cell><Data ss:Type="Number">8756666</Data><NamedCell ss:Name="Print_Area"/></Cell>
   </Row>
   <Row>
    <Cell><Data ss:Type="String">YBL023C</Data><NamedCell ss:Name="Print_Area"/></Cell>
    <Cell><Data ss:Type="String">YEL032W</Data><NamedCell ss:Name="Print_Area"/></Cell>
    <Cell><Data ss:Type="String">affinitycapturewestern</Data><NamedCell
      ss:Name="Print_Area"/></Cell>
    <Cell><Data ss:Type="Number">8756666</Data><NamedCell ss:Name="Print_Area"/></Cell>
   </Row>
   <Row>
    <Cell><Data ss:Type="String">YBL023C</Data><NamedCell ss:Name="Print_Area"/></Cell>
    <Cell><Data ss:Type="String">YEL032W</Data><NamedCell ss:Name="Print_Area"/></Cell>
    <Cell><Data ss:Type="String">affinitycapturewestern</Data><NamedCell
      ss:Name="Print_Area"/></Cell>
    <Cell><Data ss:Type="Number">12200430</Data><NamedCell ss:Name="Print_Area"/></Cell>
   </Row>
   <Row>
    <Cell><Data ss:Type="String">YBL023C</Data><NamedCell ss:Name="Print_Area"/></Cell>
    <Cell><Data ss:Type="String">YGL201C</Data><NamedCell ss:Name="Print_Area"/></Cell>
    <Cell><Data ss:Type="String">copurification</Data><NamedCell
      ss:Name="Print_Area"/></Cell>
    <Cell><Data ss:Type="Number">10567526</Data><NamedCell ss:Name="Print_Area"/></Cell>
   </Row>
   <Row>
    <Cell><Data ss:Type="String">YBL023C</Data><NamedCell ss:Name="Print_Area"/></Cell>
    <Cell><Data ss:Type="String">YGL201C</Data><NamedCell ss:Name="Print_Area"/></Cell>
    <Cell><Data ss:Type="String">colocalization</Data><NamedCell
      ss:Name="Print_Area"/></Cell>
    <Cell><Data ss:Type="Number">16093348</Data><NamedCell ss:Name="Print_Area"/></Cell>
   </Row>
   <Row>
    <Cell><Data ss:Type="String">YBL023C</Data><NamedCell ss:Name="Print_Area"/></Cell>
    <Cell><Data ss:Type="String">YGL201C</Data><NamedCell ss:Name="Print_Area"/></Cell>
    <Cell><Data ss:Type="String">cofractionation</Data><NamedCell
      ss:Name="Print_Area"/></Cell>
    <Cell><Data ss:Type="Number">12480933</Data><NamedCell ss:Name="Print_Area"/></Cell>
   </Row>
   <Row>
    <Cell><Data ss:Type="String">YBL023C</Data><NamedCell ss:Name="Print_Area"/></Cell>
    <Cell><Data ss:Type="String">YIL150C</Data><NamedCell ss:Name="Print_Area"/></Cell>
    <Cell><Data ss:Type="String">unknown</Data><NamedCell ss:Name="Print_Area"/></Cell>
    <Cell><Data ss:Type="Number">9154825</Data><NamedCell ss:Name="Print_Area"/></Cell>
   </Row>
   <Row>
    <Cell><Data ss:Type="String">YBL023C</Data><NamedCell ss:Name="Print_Area"/></Cell>
    <Cell><Data ss:Type="String">YIL150C</Data><NamedCell ss:Name="Print_Area"/></Cell>
    <Cell><Data ss:Type="String">twohybrid</Data><NamedCell ss:Name="Print_Area"/></Cell>
    <Cell><Data ss:Type="Number">9154825</Data><NamedCell ss:Name="Print_Area"/></Cell>
   </Row>
   <Row>
    <Cell><Data ss:Type="String">YBL023C</Data><NamedCell ss:Name="Print_Area"/></Cell>
    <Cell><Data ss:Type="String">YJL194W</Data><NamedCell ss:Name="Print_Area"/></Cell>
    <Cell><Data ss:Type="String">twohybrid</Data><NamedCell ss:Name="Print_Area"/></Cell>
    <Cell><Data ss:Type="Number">11237870</Data><NamedCell ss:Name="Print_Area"/></Cell>
   </Row>
   <Row>
    <Cell><Data ss:Type="String">YBL023C</Data><NamedCell ss:Name="Print_Area"/></Cell>
[truncated: 8,217,589 more chars]
