# Supplementary material for: Confirmation of Organized Modularity in the Yeast Interactome
Source: PLOS journal article supplement (doi:10.1371/journal.pbio.0050153), 2007-06-08

# Filtered-HC PCC thresholds sampling

PCC threshold 0.4

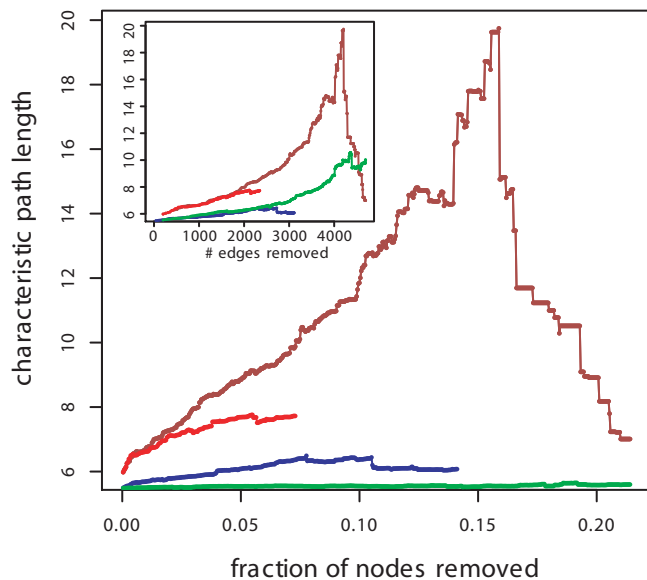

PCC threshold 0.45

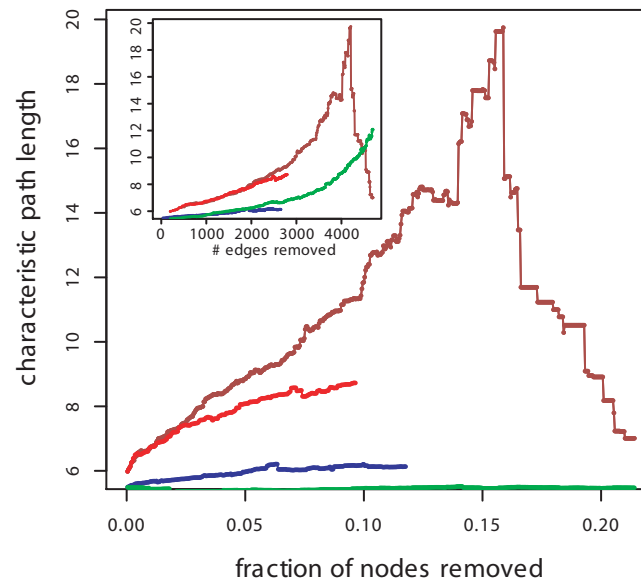

PCC threshold 0.5

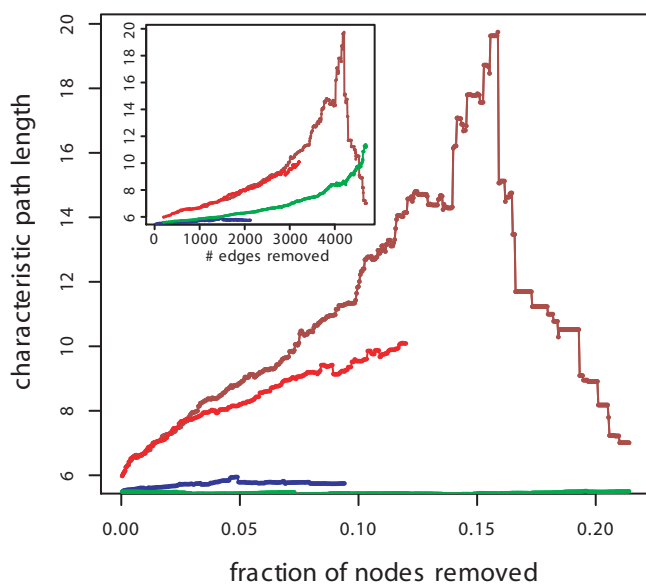

PCC threshold 0.55

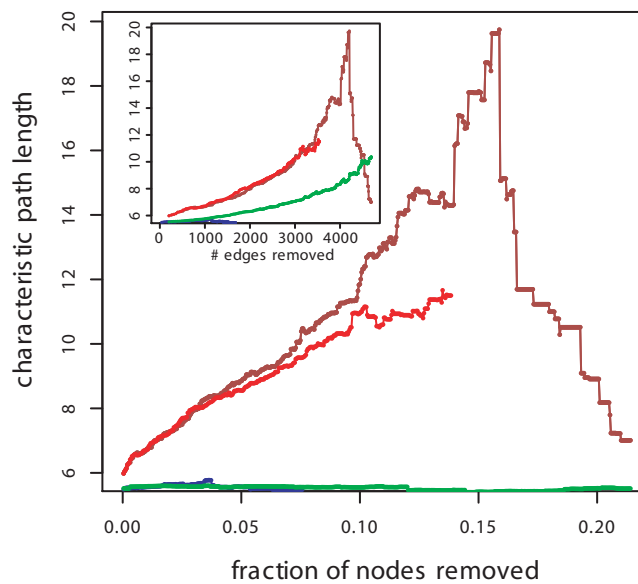

PCC threshold 0.6

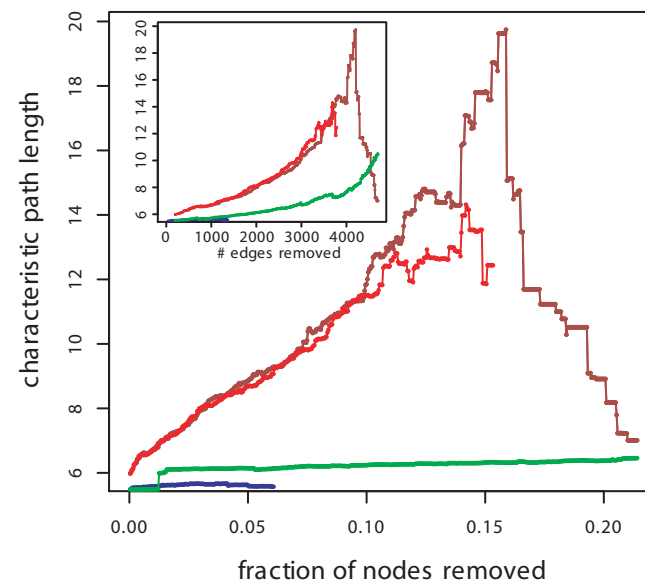

Supplement: S2 (10.1371/journal.pbio.0050153.s002) [file journal.pbio.0050153.s002]
